# Supplementary material for: Uncovering the Molecular Drivers of NHEJ DNA Repair-Implicated Missense Variants and Their Functional Consequences
Source: Genes (Basel). 2023 Sep 29;14(10):1890. doi: 10.3390/genes14101890 (PMC10606680; doi:10.3390/genes14101890)
Supplement: Supplementary file 1 [file genes-14-01890-s001.zip › NHEJ_Supplementary Data.xlsx]

## Sheet: DNA-PKCS_Sat_mut
gene	insight_class	consequence	Mutations	chrom	pos	protein_position	ref	alt	variants	mCSM_PPI	Distance_interface	Provean_scores	Provean_Predicted_Effect	MTR_scores	SNAP2_scores	polyphen2_class	polyphen2_Score1	polyphen2_Score2	Distance_lig	BIO_3D _fluc_calpha	BIO_3D _fluc_anm	BIO_3D _fluc_pfanm	BIO_3D _fluc_reach	BIO_3D _fluc_sdenm	identifier
DNA-PKCS	3	missense	A1008C	DNA-PKCS	1008	1008	A	C	Saturation-Mutagenesis	-1.354	58.4589	-2.485	Neutral	0.936699	25	neutral	-1.412	-2.066	28.074	0.685118	1.29083	19.9346	0.0749571	2.05127	DNA-PKCS_A1008C
DNA-PKCS	3	missense	A1008D	DNA-PKCS	1008	1008	A	D	Saturation-Mutagenesis	-1.743	58.4589	-3.396	Deleterious	0.936699	11	deleterious	-1.412	-3.962	28.074	0.685118	1.29083	19.9346	0.0749571	2.05127	DNA-PKCS_A1008D
DNA-PKCS	3	missense	A1008E	DNA-PKCS	1008	1008	A	E	Saturation-Mutagenesis	-1.821	58.4589	-2.773	Deleterious	0.936699	33	deleterious	-1.412	-4.215	28.074	0.685118	1.29083	19.9346	0.0749571	2.05127	DNA-PKCS_A1008E
DNA-PKCS	3	missense	A1008F	DNA-PKCS	1008	1008	A	F	Saturation-Mutagenesis	-0.668	58.4589	-3.657	Deleterious	0.936699	11	neutral	-2.379	-3.587	28.074	0.685118	1.29083	19.9346	0.0749571	2.05127	DNA-PKCS_A1008F
DNA-PKCS	3	missense	A1008G	DNA-PKCS	1008	1008	A	G	Saturation-Mutagenesis	-1.354	58.4589	-2.507	Deleterious	0.936699	41	neutral	-1.412	-2.052	28.074	0.685118	1.29083	19.9346	0.0749571	2.05127	DNA-PKCS_A1008G
DNA-PKCS	3	missense	A1008H	DNA-PKCS	1008	1008	A	H	Saturation-Mutagenesis	-1.432	58.4589	-3.455	Deleterious	0.936699	76	deleterious	-1.412	-3.502	28.074	0.685118	1.29083	19.9346	0.0749571	2.05127	DNA-PKCS_A1008H
DNA-PKCS	3	missense	A1008I	DNA-PKCS	1008	1008	A	I	Saturation-Mutagenesis	-1.074	58.4589	-2.81	Deleterious	0.936699	1	deleterious	-1.412	-3.963	28.074	0.685118	1.29083	19.9346	0.0749571	2.05127	DNA-PKCS_A1008I
DNA-PKCS	3	missense	A1008K	DNA-PKCS	1008	1008	A	K	Saturation-Mutagenesis	-1.62	58.4589	-2.773	Deleterious	0.936699	31	deleterious	-1.412	-3.385	28.074	0.685118	1.29083	19.9346	0.0749571	2.05127	DNA-PKCS_A1008K
DNA-PKCS	3	missense	A1008L	DNA-PKCS	1008	1008	A	L	Saturation-Mutagenesis	-1.21	58.4589	-2.777	Deleterious	0.936699	-15	neutral	-2.379	-3.759	28.074	0.685118	1.29083	19.9346	0.0749571	2.05127	DNA-PKCS_A1008L
DNA-PKCS	3	missense	A1008M	DNA-PKCS	1008	1008	A	M	Saturation-Mutagenesis	-1.933	58.4589	-2.708	Deleterious	0.936699	-4	neutral	-2.379	-2.064	28.074	0.685118	1.29083	19.9346	0.0749571	2.05127	DNA-PKCS_A1008M
DNA-PKCS	3	missense	A1008N	DNA-PKCS	1008	1008	A	N	Saturation-Mutagenesis	-1.199	58.4589	-2.937	Deleterious	0.936699	22	deleterious	-1.412	-4.004	28.074	0.685118	1.29083	19.9346	0.0749571	2.05127	DNA-PKCS_A1008N
DNA-PKCS	3	missense	A1008P	DNA-PKCS	1008	1008	A	P	Saturation-Mutagenesis	-1.168	58.4589	-3.008	Deleterious	0.936699	44	deleterious	-1.412	-4.053	28.074	0.685118	1.29083	19.9346	0.0749571	2.05127	DNA-PKCS_A1008P
DNA-PKCS	3	missense	A1008Q	DNA-PKCS	1008	1008	A	Q	Saturation-Mutagenesis	-1.199	58.4589	-2.64	Deleterious	0.936699	7	deleterious	-1.412	-2.977	28.074	0.685118	1.29083	19.9346	0.0749571	2.05127	DNA-PKCS_A1008Q
DNA-PKCS	3	missense	A1008R	DNA-PKCS	1008	1008	A	R	Saturation-Mutagenesis	-1.878	58.4589	-2.808	Deleterious	0.936699	50	deleterious	-1.412	-3.789	28.074	0.685118	1.29083	19.9346	0.0749571	2.05127	DNA-PKCS_A1008R
DNA-PKCS	3	missense	A1008S	DNA-PKCS	1008	1008	A	S	Saturation-Mutagenesis	-1.533	58.4589	-1.439	Neutral	0.936699	50	deleterious	-1.412	-4.663	28.074	0.685118	1.29083	19.9346	0.0749571	2.05127	DNA-PKCS_A1008S
DNA-PKCS	3	missense	A1008T	DNA-PKCS	1008	1008	A	T	Saturation-Mutagenesis	-0.777	58.4589	-1.639	Neutral	0.936699	28	deleterious	-1.412	-2.328	28.074	0.685118	1.29083	19.9346	0.0749571	2.05127	DNA-PKCS_A1008T
DNA-PKCS	3	missense	A1008V	DNA-PKCS	1008	1008	A	V	Saturation-Mutagenesis	-1.012	58.4589	-2.13	Neutral	0.936699	39	deleterious	-1.412	-3.696	28.074	0.685118	1.29083	19.9346	0.0749571	2.05127	DNA-PKCS_A1008V
DNA-PKCS	3	missense	A1008W	DNA-PKCS	1008	1008	A	W	Saturation-Mutagenesis	-1.152	58.4589	-4.381	Deleterious	0.936699	12	neutral	-2.379	-3.521	28.074	0.677035	1.3161	18.9305	0.0734038	2.10019	DNA-PKCS_A1008W
DNA-PKCS	3	missense	A1008Y	DNA-PKCS	1008	1008	A	Y	Saturation-Mutagenesis	-1.834	58.4589	-3.557	Deleterious	0.936699	12	neutral	-2.379	-3.75	28.074	0.677035	1.3161	18.9305	0.0734038	2.10019	DNA-PKCS_A1008Y
DNA-PKCS	3	missense	A1012C	DNA-PKCS	1012	1012	A	C	Saturation-Mutagenesis	-1.378	58.7778	-1.96	Neutral	0.942586	38	deleterious	-2.191	-4.206	31.1159	0.509738	0.966879	13.5737	0.0531252	1.56629	DNA-PKCS_A1012C
DNA-PKCS	3	missense	A1012D	DNA-PKCS	1012	1012	A	D	Saturation-Mutagenesis	-1.719	58.7778	-3.907	Deleterious	0.942586	13	neutral	-2.191	-2.283	31.1159	0.509738	0.966879	13.5737	0.0531252	1.56629	DNA-PKCS_A1012D
DNA-PKCS	3	missense	A1012E	DNA-PKCS	1012	1012	A	E	Saturation-Mutagenesis	-1.801	58.7778	-3.378	Deleterious	0.942586	28	neutral	-2.191	-3.063	31.1159	0.509738	0.966879	13.5737	0.0531252	1.56629	DNA-PKCS_A1012E
DNA-PKCS	3	missense	A1012F	DNA-PKCS	1012	1012	A	F	Saturation-Mutagenesis	-0.889	58.7778	-4.032	Deleterious	0.942586	-76	deleterious	-1.141	-3.563	31.1159	0.509738	0.966879	13.5737	0.0531252	1.56629	DNA-PKCS_A1012F
DNA-PKCS	3	missense	A1012G	DNA-PKCS	1012	1012	A	G	Saturation-Mutagenesis	-1.378	58.7778	-2.846	Deleterious	0.942586	9	deleterious	-1.141	-4.027	31.1159	0.509738	0.966879	13.5737	0.0531252	1.56629	DNA-PKCS_A1012G
DNA-PKCS	3	missense	A1012H	DNA-PKCS	1012	1012	A	H	Saturation-Mutagenesis	-1.393	58.7778	-4.062	Deleterious	0.942586	65	deleterious	-2.191	-4.91	31.1159	0.509738	0.966879	13.5737	0.0531252	1.56629	DNA-PKCS_A1012H
DNA-PKCS	3	missense	A1012I	DNA-PKCS	1012	1012	A	I	Saturation-Mutagenesis	-1.011	58.7778	-3.252	Deleterious	0.942586	49	deleterious	-1.141	-3.836	31.1159	0.509738	0.966879	13.5737	0.0531252	1.56629	DNA-PKCS_A1012I
DNA-PKCS	3	missense	A1012K	DNA-PKCS	1012	1012	A	K	Saturation-Mutagenesis	-1.583	58.7778	-3.305	Deleterious	0.942586	35	neutral	-2.191	-2.615	31.1159	0.509738	0.966879	13.5737	0.0531252	1.56629	DNA-PKCS_A1012K
DNA-PKCS	3	missense	A1012L	DNA-PKCS	1012	1012	A	L	Saturation-Mutagenesis	-1.124	58.7778	-3.25	Deleterious	0.942586	24	deleterious	-1.141	-3.759	31.1159	0.509738	0.966879	13.5737	0.0531252	1.56629	DNA-PKCS_A1012L
DNA-PKCS	3	missense	A1012M	DNA-PKCS	1012	1012	A	M	Saturation-Mutagenesis	-1.71	58.7778	-3.215	Deleterious	0.942586	-52	deleterious	-1.141	-3.527	31.1159	0.509738	0.966879	13.5737	0.0531252	1.56629	DNA-PKCS_A1012M
DNA-PKCS	3	missense	A1012N	DNA-PKCS	1012	1012	A	N	Saturation-Mutagenesis	-1.227	58.7778	-3.751	Deleterious	0.942586	30	neutral	-2.191	-3.082	31.1159	0.509738	0.966879	13.5737	0.0531252	1.56629	DNA-PKCS_A1012N
DNA-PKCS	3	missense	A1012P	DNA-PKCS	1012	1012	A	P	Saturation-Mutagenesis	-1.196	58.7778	-3.348	Deleterious	0.942586	3	deleterious	-1.141	-4.202	31.1159	0.509738	0.966879	13.5737	0.0531252	1.56629	DNA-PKCS_A1012P
DNA-PKCS	3	missense	A1012Q	DNA-PKCS	1012	1012	A	Q	Saturation-Mutagenesis	-1.227	58.7778	-3.312	Deleterious	0.942586	-4	neutral	-2.191	-4.082	31.1159	0.509738	0.966879	13.5737	0.0531252	1.56629	DNA-PKCS_A1012Q
DNA-PKCS	3	missense	A1012R	DNA-PKCS	1012	1012	A	R	Saturation-Mutagenesis	-1.855	58.7778	-3.343	Deleterious	0.942586	4	neutral	-2.191	-3.944	31.1159	0.509738	0.966879	13.5737	0.0531252	1.56629	DNA-PKCS_A1012R
DNA-PKCS	3	missense	A1012S	DNA-PKCS	1012	1012	A	S	Saturation-Mutagenesis	-1.526	58.7778	-1.62	Neutral	0.942586	66	neutral	-2.191	-2.701	31.1159	0.509738	0.966879	13.5737	0.0531252	1.56629	DNA-PKCS_A1012S
DNA-PKCS	3	missense	A1012T	DNA-PKCS	1012	1012	A	T	Saturation-Mutagenesis	-0.818	58.7778	-1.829	Neutral	0.942586	28	neutral	-2.191	-2.305	31.1159	0.509738	0.966879	13.5737	0.0531252	1.56629	DNA-PKCS_A1012T
DNA-PKCS	3	missense	A1012V	DNA-PKCS	1012	1012	A	V	Saturation-Mutagenesis	-0.957	58.7778	-2.537	Deleterious	0.942586	60	deleterious	-1.141	-3.776	31.1159	0.509738	0.966879	13.5737	0.0531252	1.56629	DNA-PKCS_A1012V
DNA-PKCS	3	missense	A1012W	DNA-PKCS	1012	1012	A	W	Saturation-Mutagenesis	-1.049	58.7778	-4.657	Deleterious	0.942586	-8	deleterious	-1.141	-4.162	31.1159	0.509738	0.966879	13.5737	0.0531252	1.56629	DNA-PKCS_A1012W
DNA-PKCS	3	missense	A1012Y	DNA-PKCS	1012	1012	A	Y	Saturation-Mutagenesis	-1.649	58.7778	-4.03	Deleterious	0.942586	-70	deleterious	-1.141	-3.992	31.1159	0.509738	0.966879	13.5737	0.0531252	1.56629	DNA-PKCS_A1012Y
DNA-PKCS	3	missense	A101C	DNA-PKCS	101	101	A	C	Saturation-Mutagenesis	-0.67	3.60388	-0.728	Neutral	0.936956	-78	deleterious	-1.076	-3.495	90.0678	0.479881	1.13248	14.0321	0.0527893	1.79807	DNA-PKCS_A101C
DNA-PKCS	3	missense	A101D	DNA-PKCS	101	101	A	D	Saturation-Mutagenesis	-0.756	3.60388	-0.468	Neutral	0.936956	5	neutral	-2.742	-4.167	90.0678	0.479881	1.13248	14.0321	0.0527893	1.79807	DNA-PKCS_A101D
DNA-PKCS	3	missense	A101E	DNA-PKCS	101	101	A	E	Saturation-Mutagenesis	-0.509	3.60388	-0.147	Neutral	0.936956	-5	deleterious	-1.593	-3.333	90.0678	0.479881	1.13248	14.0321	0.0527893	1.79807	DNA-PKCS_A101E
DNA-PKCS	3	missense	A101F	DNA-PKCS	101	101	A	F	Saturation-Mutagenesis	-0.063	3.60388	-0.625	Neutral	0.936956	-64	neutral	-1.886	-3.209	90.0678	0.479881	1.13248	14.0321	0.0527893	1.79807	DNA-PKCS_A101F
DNA-PKCS	3	missense	A101G	DNA-PKCS	101	101	A	G	Saturation-Mutagenesis	-0.765	3.60388	-1.125	Neutral	0.936956	-76	neutral	-2.279	-3.05	90.0678	0.479881	1.13248	14.0321	0.0527893	1.79807	DNA-PKCS_A101G
DNA-PKCS	3	missense	A101H	DNA-PKCS	101	101	A	H	Saturation-Mutagenesis	-0.947	3.60388	-0.436	Neutral	0.936956	-8	neutral	-1.736	-2.858	90.0678	0.479881	1.13248	14.0321	0.0527893	1.79807	DNA-PKCS_A101H
DNA-PKCS	3	missense	A101I	DNA-PKCS	101	101	A	I	Saturation-Mutagenesis	-0.803	3.60388	-0.004	Neutral	0.936956	43	deleterious	-1.303	-2.385	90.0678	0.479881	1.13248	14.0321	0.0527893	1.79807	DNA-PKCS_A101I
DNA-PKCS	3	missense	A101K	DNA-PKCS	101	101	A	K	Saturation-Mutagenesis	-0.638	3.60388	0.124	Neutral	0.936956	32	deleterious	-1.331	-3.073	90.0678	0.479881	1.13248	14.0321	0.0527893	1.79807	DNA-PKCS_A101K
DNA-PKCS	3	missense	A101L	DNA-PKCS	101	101	A	L	Saturation-Mutagenesis	-0.539	3.60388	0.288	Neutral	0.936956	-57	neutral	-1.804	-3.012	90.0678	0.479881	1.13248	14.0321	0.0527893	1.79807	DNA-PKCS_A101L
DNA-PKCS	3	missense	A101M	DNA-PKCS	101	101	A	M	Saturation-Mutagenesis	-0.068	3.60388	0.516	Neutral	0.936956	-51	deleterious	-1.792	-3.318	90.0678	0.479881	1.13248	14.0321	0.0527893	1.79807	DNA-PKCS_A101M
DNA-PKCS	3	missense	A101N	DNA-PKCS	101	101	A	N	Saturation-Mutagenesis	-0.761	3.60388	-0.273	Neutral	0.936956	18	neutral	-2.306	-2.544	90.0678	0.479881	1.13248	14.0321	0.0527893	1.79807	DNA-PKCS_A101N
DNA-PKCS	3	missense	A101P	DNA-PKCS	101	101	A	P	Saturation-Mutagenesis	-0.765	3.60388	-0.776	Neutral	0.936956	-19	neutral	-1.905	-1.586	90.0678	0.479881	1.13248	14.0321	0.0527893	1.79807	DNA-PKCS_A101P
DNA-PKCS	3	missense	A101Q	DNA-PKCS	101	101	A	Q	Saturation-Mutagenesis	-0.502	3.60388	0.141	Neutral	0.936956	-58	deleterious	-1.762	-3.455	90.0678	0.479881	1.13248	14.0321	0.0527893	1.79807	DNA-PKCS_A101Q
DNA-PKCS	3	missense	A101R	DNA-PKCS	101	101	A	R	Saturation-Mutagenesis	0.17	3.60388	0.052	Neutral	0.936956	25	deleterious	-1.74	-3.803	90.0678	0.479881	1.13248	14.0321	0.0527893	1.79807	DNA-PKCS_A101R
DNA-PKCS	3	missense	A101S	DNA-PKCS	101	101	A	S	Saturation-Mutagenesis	-0.603	3.60388	0.137	Neutral	0.936956	55	deleterious	-1.591	-5.337	90.0678	0.479881	1.13248	14.0321	0.0527893	1.79807	DNA-PKCS_A101S
DNA-PKCS	2	missense	A101T	DNA-PKCS	101	101	A	T	Non-Pathogenic	-0.803	3.60388	0.274	Neutral	0.936956	39	deleterious	-1.591	-3.153	90.0678	0.479881	1.13248	14.0321	0.0527893	1.79807	DNA-PKCS_A101T
DNA-PKCS	3	missense	A101V	DNA-PKCS	101	101	A	V	Saturation-Mutagenesis	-0.803	3.60388	0.098	Neutral	0.936956	-17	deleterious	-1.303	-4.422	90.0678	0.479881	1.13248	14.0321	0.0527893	1.79807	DNA-PKCS_A101V
DNA-PKCS	3	missense	A101W	DNA-PKCS	101	101	A	W	Saturation-Mutagenesis	-0.923	3.60388	-0.843	Neutral	0.936956	-47	deleterious	-1.212	-4.244	90.0678	0.479881	1.13248	14.0321	0.0527893	1.79807	DNA-PKCS_A101W
DNA-PKCS	3	missense	A101Y	DNA-PKCS	101	101	A	Y	Saturation-Mutagenesis	-0.025	3.60388	-0.599	Neutral	0.936956	-53	deleterious	-1.212	-3.876	90.0678	0.479881	1.13248	14.0321	0.0527893	1.79807	DNA-PKCS_A101Y
DNA-PKCS	3	missense	A1067C	DNA-PKCS	1067	1067	A	C	Saturation-Mutagenesis	-1.071	67.1548	-3.127	Deleterious	0.768264	-24	deleterious	-0.879	-3.458	36.4906	0.635157	1.4596	14.9597	0.0589031	1.97963	DNA-PKCS_A1067C
DNA-PKCS	3	missense	A1067D	DNA-PKCS	1067	1067	A	D	Saturation-Mutagenesis	-1.337	67.1548	-4.524	Deleterious	0.768264	-20	deleterious	-0.879	-3.774	36.4906	0.635157	1.4596	14.9597	0.0589031	1.97963	DNA-PKCS_A1067D
DNA-PKCS	3	missense	A1067E	DNA-PKCS	1067	1067	A	E	Saturation-Mutagenesis	-1.372	67.1548	-3.875	Deleterious	0.768264	-14	deleterious	-0.879	-4.962	36.4906	0.635157	1.4596	14.9597	0.0589031	1.97963	DNA-PKCS_A1067E
DNA-PKCS	3	missense	A1067F	DNA-PKCS	1067	1067	A	F	Saturation-Mutagenesis	0.195	67.1548	-4.657	Deleterious	0.768264	-5	deleterious	-1.219	-3.793	36.4906	0.635157	1.4596	14.9597	0.0589031	1.97963	DNA-PKCS_A1067F
DNA-PKCS	3	missense	A1067G	DNA-PKCS	1067	1067	A	G	Saturation-Mutagenesis	-1.071	67.1548	-3.16	Deleterious	0.768264	-10	deleterious	-0.879	-4.58	36.4906	0.635157	1.4596	14.9597	0.0589031	1.97963	DNA-PKCS_A1067G
DNA-PKCS	3	missense	A1067H	DNA-PKCS	1067	1067	A	H	Saturation-Mutagenesis	-0.965	67.1548	-4.69	Deleterious	0.768264	28	deleterious	-0.879	-3.296	36.4906	0.635157	1.4596	14.9597	0.0589031	1.97963	DNA-PKCS_A1067H
DNA-PKCS	3	missense	A1067I	DNA-PKCS	1067	1067	A	I	Saturation-Mutagenesis	-0.782	67.1548	-3.842	Deleterious	0.768264	-13	deleterious	-1.219	-3.942	36.4906	0.635157	1.4596	14.9597	0.0589031	1.97963	DNA-PKCS_A1067I
DNA-PKCS	3	missense	A1067K	DNA-PKCS	1067	1067	A	K	Saturation-Mutagenesis	-1.15	67.1548	-3.842	Deleterious	0.768264	-6	deleterious	-0.879	-3.773	36.4906	0.635157	1.4596	14.9597	0.0589031	1.97963	DNA-PKCS_A1067K
DNA-PKCS	3	missense	A1067L	DNA-PKCS	1067	1067	A	L	Saturation-Mutagenesis	-0.881	67.1548	-3.775	Deleterious	0.768264	-26	deleterious	-1.219	-4.779	36.4906	0.635157	1.4596	14.9597	0.0589031	1.97963	DNA-PKCS_A1067L
DNA-PKCS	3	missense	A1067M	DNA-PKCS	1067	1067	A	M	Saturation-Mutagenesis	-0.838	67.1548	-3.775	Deleterious	0.768264	-16	deleterious	-1.219	-3.556	36.4906	0.635157	1.4596	14.9597	0.0589031	1.97963	DNA-PKCS_A1067M
DNA-PKCS	3	missense	A1067N	DNA-PKCS	1067	1067	A	N	Saturation-Mutagenesis	-0.932	67.1548	-4.557	Deleterious	0.768264	-33	deleterious	-0.879	-3.404	36.4906	0.635157	1.4596	14.9597	0.0589031	1.97963	DNA-PKCS_A1067N
DNA-PKCS	3	missense	A1067P	DNA-PKCS	1067	1067	A	P	Saturation-Mutagenesis	-0.974	67.1548	-3.942	Deleterious	0.768264	-8	deleterious	-0.879	-4.392	36.4906	0.635157	1.4596	14.9597	0.0589031	1.97963	DNA-PKCS_A1067P
DNA-PKCS	3	missense	A1067Q	DNA-PKCS	1067	1067	A	Q	Saturation-Mutagenesis	-0.932	67.1548	-3.842	Deleterious	0.768264	-25	deleterious	-0.879	-3.885	36.4906	0.635157	1.4596	14.9597	0.0589031	1.97963	DNA-PKCS_A1067Q
DNA-PKCS	3	missense	A1067R	DNA-PKCS	1067	1067	A	R	Saturation-Mutagenesis	-1.22	67.1548	-3.909	Deleterious	0.768264	-25	deleterious	-0.879	-3.261	36.4906	0.635157	1.4596	14.9597	0.0589031	1.97963	DNA-PKCS_A1067R
DNA-PKCS	3	missense	A1067S	DNA-PKCS	1067	1067	A	S	Saturation-Mutagenesis	-1.153	67.1548	-2.079	Neutral	0.768264	-51	deleterious	-0.879	-3.233	36.4906	0.635157	1.4596	14.9597	0.0589031	1.97963	DNA-PKCS_A1067S
DNA-PKCS	3	missense	A1067T	DNA-PKCS	1067	1067	A	T	Saturation-Mutagenesis	-0.547	67.1548	-2.994	Deleterious	0.768264	-25	deleterious	-0.879	-2.953	36.4906	0.635157	1.4596	14.9597	0.0589031	1.97963	DNA-PKCS_A1067T
DNA-PKCS	3	missense	A1067V	DNA-PKCS	1067	1067	A	V	Saturation-Mutagenesis	-0.72	67.1548	-3.127	Deleterious	0.768264	-15	deleterious	-0.879	-4.262	36.4906	0.635157	1.4596	14.9597	0.0589031	1.97963	DNA-PKCS_A1067V
DNA-PKCS	3	missense	A1067W	DNA-PKCS	1067	1067	A	W	Saturation-Mutagenesis	-0.107	67.1548	-5.539	Deleterious	0.757985	0	deleterious	-1.219	-3.292	36.4906	0.58234	1.11019	13.7401	0.0562946	1.84889	DNA-PKCS_A1067W
DNA-PKCS	3	missense	A1067Y	DNA-PKCS	1067	1067	A	Y	Saturation-Mutagenesis	-0.566	67.1548	-4.69	Deleterious	0.768264	-4	deleterious	-1.219	-3.539	36.4906	0.58234	1.11019	13.7401	0.0562946	1.84889	DNA-PKCS_A1067Y
DNA-PKCS	3	missense	A1072C	DNA-PKCS	1072	1072	A	C	Saturation-Mutagenesis	-0.176	70.4696	-2.79	Deleterious	0.766362	18	deleterious	-1.038	-3.664	33.4751	0.474312	1.18727	13.9545	0.0532323	1.57911	DNA-PKCS_A1072C
DNA-PKCS	3	missense	A1072D	DNA-PKCS	1072	1072	A	D	Saturation-Mutagenesis	-0.367	70.4696	-3.514	Deleterious	0.766362	-3	deleterious	-0.941	-2.953	33.4751	0.474312	1.18727	13.9545	0.0532323	1.57911	DNA-PKCS_A1072D
DNA-PKCS	3	missense	A1072E	DNA-PKCS	1072	1072	A	E	Saturation-Mutagenesis	-0.54	70.4696	-3.001	Deleterious	0.766362	19	deleterious	-0.941	-2.729	33.4751	0.474312	1.18727	13.9545	0.0532323	1.57911	DNA-PKCS_A1072E
DNA-PKCS	3	missense	A1072F	DNA-PKCS	1072	1072	A	F	Saturation-Mutagenesis	-0.028	70.4696	-4.086	Deleterious	0.766362	-76	deleterious	-1.038	-3.711	33.4751	0.474312	1.18727	13.9545	0.0532323	1.57911	DNA-PKCS_A1072F
DNA-PKCS	3	missense	A1072G	DNA-PKCS	1072	1072	A	G	Saturation-Mutagenesis	-0.176	70.4696	-2.122	Neutral	0.766362	-14	deleterious	-1.038	-4.597	33.4751	0.474312	1.18727	13.9545	0.0532323	1.57911	DNA-PKCS_A1072G
DNA-PKCS	3	missense	A1072H	DNA-PKCS	1072	1072	A	H	Saturation-Mutagenesis	-0.056	70.4696	-3.783	Deleterious	0.766362	-4	deleterious	-0.941	-3.683	33.4751	0.474312	1.18727	13.9545	0.0532323	1.57911	DNA-PKCS_A1072H
DNA-PKCS	3	missense	A1072I	DNA-PKCS	1072	1072	A	I	Saturation-Mutagenesis	-0.107	70.4696	-3.304	Deleterious	0.766362	34	deleterious	-1.038	-3.396	33.4751	0.474312	1.18727	13.9545	0.0532323	1.57911	DNA-PKCS_A1072I
DNA-PKCS	3	missense	A1072K	DNA-PKCS	1072	1072	A	K	Saturation-Mutagenesis	-0.22	70.4696	-3.001	Deleterious	0.766362	26	deleterious	-0.941	-3.98	33.4751	0.474312	1.18727	13.9545	0.0532323	1.57911	DNA-PKCS_A1072K
DNA-PKCS	3	missense	A1072L	DNA-PKCS	1072	1072	A	L	Saturation-Mutagenesis	-0.582	70.4696	-3.371	Deleterious	0.766362	10	deleterious	-1.038	-2.892	33.4751	0.474312	1.18727	13.9545	0.0532323	1.57911	DNA-PKCS_A1072L
DNA-PKCS	3	missense	A1072M	DNA-PKCS	1072	1072	A	M	Saturation-Mutagenesis	-0.799	70.4696	-3.136	Deleterious	0.766362	-61	deleterious	-1.038	-3.185	33.4751	0.474312	1.18727	13.9545	0.0532323	1.57911	DNA-PKCS_A1072M
DNA-PKCS	3	missense	A1072N	DNA-PKCS	1072	1072	A	N	Saturation-Mutagenesis	-0.049	70.4696	-3.516	Deleterious	0.766362	11	deleterious	-0.941	-3.492	33.4751	0.474312	1.18727	13.9545	0.0532323	1.57911	DNA-PKCS_A1072N
DNA-PKCS	3	missense	A1072P	DNA-PKCS	1072	1072	A	P	Saturation-Mutagenesis	-0.489	70.4696	-1.955	Neutral	0.766362	-21	deleterious	-1.038	-3.413	33.4751	0.474312	1.18727	13.9545	0.0532323	1.57911	DNA-PKCS_A1072P
DNA-PKCS	3	missense	A1072Q	DNA-PKCS	1072	1072	A	Q	Saturation-Mutagenesis	-0.049	70.4696	-3.001	Deleterious	0.766362	-22	deleterious	-0.941	-3.812	33.4751	0.474312	1.18727	13.9545	0.0532323	1.57911	DNA-PKCS_A1072Q
DNA-PKCS	3	missense	A1072R	DNA-PKCS	1072	1072	A	R	Saturation-Mutagenesis	-1.245	70.4696	-3.202	Deleterious	0.766362	-45	deleterious	-0.941	-4.512	33.4751	0.474312	1.18727	13.9545	0.0532323	1.57911	DNA-PKCS_A1072R
DNA-PKCS	3	missense	A1072S	DNA-PKCS	1072	1072	A	S	Saturation-Mutagenesis	-0.929	70.4696	-1.574	Neutral	0.766362	50	deleterious	-0.941	-2.76	33.4751	0.474312	1.18727	13.9545	0.0532323	1.57911	DNA-PKCS_A1072S
DNA-PKCS	3	missense	A1072T	DNA-PKCS	1072	1072	A	T	Saturation-Mutagenesis	0.273	70.4696	-2.154	Neutral	0.766362	6	deleterious	-0.941	-3.68	33.4751	0.474312	1.18727	13.9545	0.0532323	1.57911	DNA-PKCS_A1072T
DNA-PKCS	3	missense	A1072V	DNA-PKCS	1072	1072	A	V	Saturation-Mutagenesis	-0.143	70.4696	-2.489	Neutral	0.766362	48	deleterious	-1.038	-3.563	33.4751	0.474312	1.18727	13.9545	0.0532323	1.57911	DNA-PKCS_A1072V
DNA-PKCS	3	missense	A1072W	DNA-PKCS	1072	1072	A	W	Saturation-Mutagenesis	-0.645	70.4696	-4.666	Deleterious	0.766362	-21	deleterious	-1.038	-4.428	33.4751	0.474312	1.18727	13.9545	0.0532323	1.57911	DNA-PKCS_A1072W
DNA-PKCS	3	missense	A1072Y	DNA-PKCS	1072	1072	A	Y	Saturation-Mutagenesis	-0.919	70.4696	-3.951	Deleterious	0.766362	-79	deleterious	-1.038	-3.856	33.4751	0.474312	1.18727	13.9545	0.0532323	1.57911	DNA-PKCS_A1072Y
DNA-PKCS	3	missense	A1078C	DNA-PKCS	1078	1078	A	C	Saturation-Mutagenesis	-1.343	60.4466	-3.394	Deleterious	0.770507	17	deleterious	-1.004	-3.071	35.4158	0.355702	0.783445	11.4731	0.0441569	1.15629	DNA-PKCS_A1078C
DNA-PKCS	3	missense	A1078D	DNA-PKCS	1078	1078	A	D	Saturation-Mutagenesis	-1.563	60.4466	-5.09	Deleterious	0.770507	-37	deleterious	-1.004	-4.033	35.4158	0.355702	0.783445	11.4731	0.0441569	1.15629	DNA-PKCS_A1078D
DNA-PKCS	3	missense	A1078E	DNA-PKCS	1078	1078	A	E	Saturation-Mutagenesis	-1.702	60.4466	-4.242	Deleterious	0.770507	-15	deleterious	-1.004	-4.78	35.4158	0.355702	0.783445	11.4731	0.0441569	1.15629	DNA-PKCS_A1078E
DNA-PKCS	3	missense	A1078F	DNA-PKCS	1078	1078	A	F	Saturation-Mutagenesis	0.236	60.4466	-5.09	Deleterious	0.770507	7	deleterious	-1.004	-2.535	35.4158	0.355702	0.783445	11.4731	0.0441569	1.15629	DNA-PKCS_A1078F
DNA-PKCS	3	missense	A1078G	DNA-PKCS	1078	1078	A	G	Saturation-Mutagenesis	-1.343	60.4466	-3.394	Deleterious	0.770507	14	deleterious	-1.004	-3.998	35.4158	0.355702	0.783445	11.4731	0.0441569	1.15629	DNA-PKCS_A1078G
DNA-PKCS	3	missense	A1078H	DNA-PKCS	1078	1078	A	H	Saturation-Mutagenesis	-1.237	60.4466	-5.09	Deleterious	0.770507	-30	deleterious	-1.229	-4.209	35.4158	0.355702	0.783445	11.4731	0.0441569	1.15629	DNA-PKCS_A1078H
DNA-PKCS	3	missense	A1078I	DNA-PKCS	1078	1078	A	I	Saturation-Mutagenesis	-1.222	60.4466	-4.242	Deleterious	0.770507	21	deleterious	-1.004	-3.458	35.4158	0.355702	0.783445	11.4731	0.0441569	1.15629	DNA-PKCS_A1078I
DNA-PKCS	3	missense	A1078K	DNA-PKCS	1078	1078	A	K	Saturation-Mutagenesis	-1.468	60.4466	-4.242	Deleterious	0.770507	-33	deleterious	-1.229	-3.894	35.4158	0.355702	0.783445	11.4731	0.0441569	1.15629	DNA-PKCS_A1078K
DNA-PKCS	3	missense	A1078L	DNA-PKCS	1078	1078	A	L	Saturation-Mutagenesis	-1.436	60.4466	-4.242	Deleterious	0.770507	4	deleterious	-1.004	-3.755	35.4158	0.355702	0.783445	11.4731	0.0441569	1.15629	DNA-PKCS_A1078L
DNA-PKCS	3	missense	A1078M	DNA-PKCS	1078	1078	A	M	Saturation-Mutagenesis	-0.867	60.4466	-4.242	Deleterious	0.770507	45	deleterious	-1.004	-2.728	35.4158	0.355702	0.783445	11.4731	0.0441569	1.15629	DNA-PKCS_A1078M
DNA-PKCS	3	missense	A1078N	DNA-PKCS	1078	1078	A	N	Saturation-Mutagenesis	-1.164	60.4466	-5.09	Deleterious	0.770507	15	deleterious	-1.004	-3.54	35.4158	0.355702	0.783445	11.4731	0.0441569	1.15629	DNA-PKCS_A1078N
DNA-PKCS	3	missense	A1078P	DNA-PKCS	1078	1078	A	P	Saturation-Mutagenesis	-1.386	60.4466	-4.242	Deleterious	0.770507	15	deleterious	-1.004	-3.999	35.4158	0.355702	0.783445	11.4731	0.0441569	1.15629	DNA-PKCS_A1078P
DNA-PKCS	3	missense	A1078Q	DNA-PKCS	1078	1078	A	Q	Saturation-Mutagenesis	-1.164	60.4466	-4.242	Deleterious	0.770507	24	deleterious	-1.004	-3.486	35.4158	0.355702	0.783445	11.4731	0.0441569	1.15629	DNA-PKCS_A1078Q
DNA-PKCS	3	missense	A1078R	DNA-PKCS	1078	1078	A	R	Saturation-Mutagenesis	-1.65	60.4466	-4.242	Deleterious	0.770507	18	deleterious	-1.229	-4.211	35.4158	0.355702	0.783445	11.4731	0.0441569	1.15629	DNA-PKCS_A1078R
DNA-PKCS	3	missense	A1078S	DNA-PKCS	1078	1078	A	S	Saturation-Mutagenesis	-1.704	60.4466	-2.545	Deleterious	0.770507	22	deleterious	-1.004	-3.557	35.4158	0.355702	0.783445	11.4731	0.0441569	1.15629	DNA-PKCS_A1078S
DNA-PKCS	3	missense	A1078T	DNA-PKCS	1078	1078	A	T	Saturation-Mutagenesis	-0.657	60.4466	-3.394	Deleterious	0.770507	11	deleterious	-1.004	-3.794	35.4158	0.355702	0.783445	11.4731	0.0441569	1.15629	DNA-PKCS_A1078T
DNA-PKCS	3	missense	A1078V	DNA-PKCS	1078	1078	A	V	Saturation-Mutagenesis	-1.173	60.4466	-3.394	Deleterious	0.770507	17	deleterious	-1.004	-4.512	35.4158	0.355702	0.783445	11.4731	0.0441569	1.15629	DNA-PKCS_A1078V
DNA-PKCS	3	missense	A1078W	DNA-PKCS	1078	1078	A	W	Saturation-Mutagenesis	-0.408	60.4466	-5.939	Deleterious	0.770507	1	deleterious	-1.004	-3.905	35.4158	0.270167	0.702745	10.1027	0.0350466	0.935983	DNA-PKCS_A1078W
DNA-PKCS	3	missense	A1078Y	DNA-PKCS	1078	1078	A	Y	Saturation-Mutagenesis	-0.997	60.4466	-5.09	Deleterious	0.770507	-20	deleterious	-1.004	-2.558	35.4158	0.270167	0.702745	10.1027	0.0350466	0.935983	DNA-PKCS_A1078Y
DNA-PKCS	3	missense	A1081C	DNA-PKCS	1081	1081	A	C	Saturation-Mutagenesis	-1.22	57.4398	-3.26	Deleterious	0.764067	-17	deleterious	-1.119	-3.233	40.3615	0.270167	0.702745	10.1027	0.0350466	0.935983	DNA-PKCS_A1081C
DNA-PKCS	3	missense	A1081D	DNA-PKCS	1081	1081	A	D	Saturation-Mutagenesis	-1.558	57.4398	-4.757	Deleterious	0.764067	-28	deleterious	-1.119	-3.119	40.3615	0.270167	0.702745	10.1027	0.0350466	0.935983	DNA-PKCS_A1081D
DNA-PKCS	3	missense	A1081E	DNA-PKCS	1081	1081	A	E	Saturation-Mutagenesis	-1.681	57.4398	-3.975	Deleterious	0.764067	-22	deleterious	-1.119	-2.64	40.3615	0.270167	0.702745	10.1027	0.0350466	0.935983	DNA-PKCS_A1081E
DNA-PKCS	3	missense	A1081F	DNA-PKCS	1081	1081	A	F	Saturation-Mutagenesis	-0.481	57.4398	-4.89	Deleterious	0.764067	-16	deleterious	-1.119	-4.167	40.3615	0.270167	0.702745	10.1027	0.0350466	0.935983	DNA-PKCS_A1081F
DNA-PKCS	3	missense	A1081G	DNA-PKCS	1081	1081	A	G	Saturation-Mutagenesis	-1.22	57.4398	-3.194	Deleterious	0.764067	-9	deleterious	-1.119	-3.53	40.3615	0.270167	0.702745	10.1027	0.0350466	0.935983	DNA-PKCS_A1081G
DNA-PKCS	3	missense	A1081H	DNA-PKCS	1081	1081	A	H	Saturation-Mutagenesis	-1.178	57.4398	-4.824	Deleterious	0.764067	-22	deleterious	-1.119	-4.105	40.3615	0.270167	0.702745	10.1027	0.0350466	0.935983	DNA-PKCS_A1081H
DNA-PKCS	3	missense	A1081I	DNA-PKCS	1081	1081	A	I	Saturation-Mutagenesis	-0.866	57.4398	-4.109	Deleterious	0.764067	5	deleterious	-1.119	-3.885	40.3615	0.270167	0.702745	10.1027	0.0350466	0.935983	DNA-PKCS_A1081I
DNA-PKCS	3	missense	A1081K	DNA-PKCS	1081	1081	A	K	Saturation-Mutagenesis	-1.376	57.4398	-3.975	Deleterious	0.764067	-32	deleterious	-1.119	-2.882	40.3615	0.270167	0.702745	10.1027	0.0350466	0.935983	DNA-PKCS_A1081K
DNA-PKCS	3	missense	A1081L	DNA-PKCS	1081	1081	A	L	Saturation-Mutagenesis	-1.066	57.4398	-4.109	Deleterious	0.764067	-5	deleterious	-1.119	-3.233	40.3615	0.270167	0.702745	10.1027	0.0350466	0.935983	DNA-PKCS_A1081L
DNA-PKCS	3	missense	A1081M	DNA-PKCS	1081	1081	A	M	Saturation-Mutagenesis	-1.38	57.4398	-4.042	Deleterious	0.764067	43	deleterious	-1.119	-4.13	40.3615	0.270167	0.702745	10.1027	0.0350466	0.935983	DNA-PKCS_A1081M
DNA-PKCS	3	missense	A1081N	DNA-PKCS	1081	1081	A	N	Saturation-Mutagenesis	-1.066	57.4398	-4.69	Deleterious	0.764067	-14	deleterious	-1.119	-3.323	40.3615	0.270167	0.702745	10.1027	0.0350466	0.935983	DNA-PKCS_A1081N
DNA-PKCS	3	missense	A1081P	DNA-PKCS	1081	1081	A	P	Saturation-Mutagenesis	-1.246	57.4398	-4.042	Deleterious	0.764067	1	deleterious	-1.119	-2.953	40.3615	0.270167	0.702745	10.1027	0.0350466	0.935983	DNA-PKCS_A1081P
DNA-PKCS	3	missense	A1081Q	DNA-PKCS	1081	1081	A	Q	Saturation-Mutagenesis	-1.066	57.4398	-3.975	Deleterious	0.764067	-12	deleterious	-1.119	-4.962	40.3615	0.270167	0.702745	10.1027	0.0350466	0.935983	DNA-PKCS_A1081Q
DNA-PKCS	3	missense	A1081R	DNA-PKCS	1081	1081	A	R	Saturation-Mutagenesis	-2.052	57.4398	-4.042	Deleterious	0.764067	-42	deleterious	-1.119	-3.133	40.3615	0.270167	0.702745	10.1027	0.0350466	0.935983	DNA-PKCS_A1081R
DNA-PKCS	3	missense	A1081S	DNA-PKCS	1081	1081	A	S	Saturation-Mutagenesis	-1.602	57.4398	-2.145	Neutral	0.764067	-5	deleterious	-1.119	-3.036	40.3615	0.270167	0.702745	10.1027	0.0350466	0.935983	DNA-PKCS_A1081S
DNA-PKCS	3	missense	A1081T	DNA-PKCS	1081	1081	A	T	Saturation-Mutagenesis	-0.653	57.4398	-3.127	Deleterious	0.764067	-8	deleterious	-1.119	-3.296	40.3615	0.270167	0.702745	10.1027	0.0350466	0.935983	DNA-PKCS_A1081T
DNA-PKCS	3	missense	A1081V	DNA-PKCS	1081	1081	A	V	Saturation-Mutagenesis	-0.853	57.4398	-3.327	Deleterious	0.764067	-1	deleterious	-1.119	-3.404	40.3615	0.270167	0.702745	10.1027	0.0350466	0.935983	DNA-PKCS_A1081V
DNA-PKCS	3	missense	A1081W	DNA-PKCS	1081	1081	A	W	Saturation-Mutagenesis	-1.129	57.4398	-5.739	Deleterious	0.764067	-40	deleterious	-0.941	-3.808	40.3615	0.388042	0.807981	10.6748	0.0440792	1.15759	DNA-PKCS_A1081W
DNA-PKCS	3	missense	A1081Y	DNA-PKCS	1081	1081	A	Y	Saturation-Mutagenesis	-1.245	57.4398	-4.89	Deleterious	0.764067	-45	deleterious	-1.119	-3.812	40.3615	0.388042	0.807981	10.6748	0.0440792	1.15759	DNA-PKCS_A1081Y
DNA-PKCS	3	missense	A1103C	DNA-PKCS	1103	1103	A	C	Saturation-Mutagenesis	-1.222	69.908	-1.394	Neutral	0.710367	45	deleterious	-1.015	-3.571	46.7448	0.330065	0.895293	12.486	0.0450063	1.02052	DNA-PKCS_A1103C
DNA-PKCS	3	missense	A1103D	DNA-PKCS	1103	1103	A	D	Saturation-Mutagenesis	-1.592	69.908	-3.224	Deleterious	0.710367	6	deleterious	-1.015	-3.077	46.7448	0.330065	0.895293	12.486	0.0450063	1.02052	DNA-PKCS_A1103D
DNA-PKCS	3	missense	A1103E	DNA-PKCS	1103	1103	A	E	Saturation-Mutagenesis	-1.774	69.908	-2.609	Deleterious	0.710367	10	deleterious	-1.015	-3.338	46.7448	0.330065	0.895293	12.486	0.0450063	1.02052	DNA-PKCS_A1103E
DNA-PKCS	3	missense	A1103F	DNA-PKCS	1103	1103	A	F	Saturation-Mutagenesis	-0.018	69.908	-1.624	Neutral	0.710367	-59	deleterious	-1.015	-4.257	46.7448	0.330065	0.895293	12.486	0.0450063	1.02052	DNA-PKCS_A1103F
DNA-PKCS	3	missense	A1103G	DNA-PKCS	1103	1103	A	G	Saturation-Mutagenesis	-1.222	69.908	-2.827	Deleterious	0.710367	54	deleterious	-1.015	-3.172	46.7448	0.330065	0.895293	12.486	0.0450063	1.02052	DNA-PKCS_A1103G
DNA-PKCS	3	missense	A1103H	DNA-PKCS	1103	1103	A	H	Saturation-Mutagenesis	-1.368	69.908	-3.057	Deleterious	0.710367	31	deleterious	-1.015	-3.27	46.7448	0.330065	0.895293	12.486	0.0450063	1.02052	DNA-PKCS_A1103H
DNA-PKCS	3	missense	A1103I	DNA-PKCS	1103	1103	A	I	Saturation-Mutagenesis	-1.495	69.908	0.458	Neutral	0.710367	64	deleterious	-1.015	-3.678	46.7448	0.330065	0.895293	12.486	0.0450063	1.02052	DNA-PKCS_A1103I
DNA-PKCS	3	missense	A1103K	DNA-PKCS	1103	1103	A	K	Saturation-Mutagenesis	-1.579	69.908	-2.442	Neutral	0.710367	-10	deleterious	-1.015	-2.018	46.7448	0.330065	0.895293	12.486	0.0450063	1.02052	DNA-PKCS_A1103K
DNA-PKCS	3	missense	A1103L	DNA-PKCS	1103	1103	A	L	Saturation-Mutagenesis	-1.892	69.908	0.025	Neutral	0.710367	57	deleterious	-1.015	-4.799	46.7448	0.330065	0.895293	12.486	0.0450063	1.02052	DNA-PKCS_A1103L
DNA-PKCS	3	missense	A1103M	DNA-PKCS	1103	1103	A	M	Saturation-Mutagenesis	-0.959	69.908	-0.375	Neutral	0.710367	82	deleterious	-1.015	-4.209	46.7448	0.330065	0.895293	12.486	0.0450063	1.02052	DNA-PKCS_A1103M
DNA-PKCS	3	missense	A1103N	DNA-PKCS	1103	1103	A	N	Saturation-Mutagenesis	-1.054	69.908	-3.057	Deleterious	0.710367	44	deleterious	-1.015	-5.044	46.7448	0.330065	0.895293	12.486	0.0450063	1.02052	DNA-PKCS_A1103N
DNA-PKCS	3	missense	A1103P	DNA-PKCS	1103	1103	A	P	Saturation-Mutagenesis	-1.655	69.908	-2.609	Deleterious	0.710367	58	deleterious	-1.015	-3.623	46.7448	0.330065	0.895293	12.486	0.0450063	1.02052	DNA-PKCS_A1103P
DNA-PKCS	3	missense	A1103Q	DNA-PKCS	1103	1103	A	Q	Saturation-Mutagenesis	-1.054	69.908	-2.409	Neutral	0.710367	15	deleterious	-1.015	-3.09	46.7448	0.330065	0.895293	12.486	0.0450063	1.02052	DNA-PKCS_A1103Q
DNA-PKCS	3	missense	A1103R	DNA-PKCS	1103	1103	A	R	Saturation-Mutagenesis	-1.821	69.908	-2.575	Deleterious	0.710367	38	deleterious	-1.015	-4.324	46.7448	0.330065	0.895293	12.486	0.0450063	1.02052	DNA-PKCS_A1103R
DNA-PKCS	3	missense	A1103S	DNA-PKCS	1103	1103	A	S	Saturation-Mutagenesis	-2.11	69.908	-1.579	Neutral	0.710367	18	deleterious	-1.015	-3.179	46.7448	0.330065	0.895293	12.486	0.0450063	1.02052	DNA-PKCS_A1103S
DNA-PKCS	2	missense	A1103T	DNA-PKCS	1103	1103	A	T	Non-Pathogenic	-0.598	69.908	-1.26	Neutral	0.710367	36	deleterious	-1.015	-3.487	46.7448	0.330065	0.895293	12.486	0.0450063	1.02052	DNA-PKCS_A1103T
DNA-PKCS	2	missense	A1103V	DNA-PKCS	1103	1103	A	V	Non-Pathogenic	-1.432	69.908	0.54	Neutral	0.710367	55	deleterious	-1.015	-3.927	46.7448	0.330065	0.895293	12.486	0.0450063	1.02052	DNA-PKCS_A1103V
DNA-PKCS	3	missense	A1103W	DNA-PKCS	1103	1103	A	W	Saturation-Mutagenesis	-0.921	69.908	-3.206	Deleterious	0.711058	-62	deleterious	-0.966	-4.555	46.7448	0.330065	0.895293	12.486	0.0450063	1.02052	DNA-PKCS_A1103W
DNA-PKCS	3	missense	A1103Y	DNA-PKCS	1103	1103	A	Y	Saturation-Mutagenesis	-0.904	69.908	-2.024	Neutral	0.710367	-62	deleterious	-0.966	-3.583	46.7448	0.330065	0.895293	12.486	0.0450063	1.02052	DNA-PKCS_A1103Y
DNA-PKCS	3	missense	A1112C	DNA-PKCS	1112	1112	A	C	Saturation-Mutagenesis	-0.897	70.5371	-2.794	Deleterious	0.701613	-4	deleterious	-1.262	-3.89	41.5369	0.244433	0.559864	9.78409	0.0360783	0.767103	DNA-PKCS_A1112C
DNA-PKCS	3	missense	A1112D	DNA-PKCS	1112	1112	A	D	Saturation-Mutagenesis	-1.242	70.5371	-3.657	Deleterious	0.701613	-50	deleterious	-1.262	-4.017	41.5369	0.244433	0.559864	9.78409	0.0360783	0.767103	DNA-PKCS_A1112D
DNA-PKCS	3	missense	A1112E	DNA-PKCS	1112	1112	A	E	Saturation-Mutagenesis	-1.426	70.5371	-2.742	Deleterious	0.701613	-36	deleterious	-1.262	-2.99	41.5369	0.244433	0.559864	9.78409	0.0360783	0.767103	DNA-PKCS_A1112E
DNA-PKCS	3	missense	A1112F	DNA-PKCS	1112	1112	A	F	Saturation-Mutagenesis	-0.111	70.5371	-3.957	Deleterious	0.701613	1	deleterious	-1.166	-3.36	41.5369	0.244433	0.559864	9.78409	0.0360783	0.767103	DNA-PKCS_A1112F
DNA-PKCS	3	missense	A1112G	DNA-PKCS	1112	1112	A	G	Saturation-Mutagenesis	-0.897	70.5371	-2.627	Deleterious	0.701613	-13	deleterious	-1.166	-3.788	41.5369	0.244433	0.559864	9.78409	0.0360783	0.767103	DNA-PKCS_A1112G
DNA-PKCS	3	missense	A1112H	DNA-PKCS	1112	1112	A	H	Saturation-Mutagenesis	-0.9	70.5371	-3.524	Deleterious	0.701613	-25	deleterious	-1.262	-4.589	41.5369	0.244433	0.559864	9.78409	0.0360783	0.767103	DNA-PKCS_A1112H
DNA-PKCS	3	missense	A1112I	DNA-PKCS	1112	1112	A	I	Saturation-Mutagenesis	-0.544	70.5371	-3.109	Deleterious	0.701613	26	deleterious	-1.166	-3.999	41.5369	0.244433	0.559864	9.78409	0.0360783	0.767103	DNA-PKCS_A1112I
DNA-PKCS	3	missense	A1112K	DNA-PKCS	1112	1112	A	K	Saturation-Mutagenesis	-1.063	70.5371	-2.375	Neutral	0.701613	-62	deleterious	-1.262	-3.721	41.5369	0.244433	0.559864	9.78409	0.0360783	0.767103	DNA-PKCS_A1112K
DNA-PKCS	3	missense	A1112L	DNA-PKCS	1112	1112	A	L	Saturation-Mutagenesis	-0.864	70.5371	-3.042	Deleterious	0.701613	2	deleterious	-1.166	-3.745	41.5369	0.244433	0.559864	9.78409	0.0360783	0.767103	DNA-PKCS_A1112L
DNA-PKCS	3	missense	A1112M	DNA-PKCS	1112	1112	A	M	Saturation-Mutagenesis	-1.29	70.5371	-2.809	Deleterious	0.701613	67	deleterious	-1.166	-3.466	41.5369	0.244433	0.559864	9.78409	0.0360783	0.767103	DNA-PKCS_A1112M
DNA-PKCS	3	missense	A1112N	DNA-PKCS	1112	1112	A	N	Saturation-Mutagenesis	-0.77	70.5371	-3.457	Deleterious	0.701613	-3	deleterious	-1.262	-3.942	41.5369	0.244433	0.559864	9.78409	0.0360783	0.767103	DNA-PKCS_A1112N
DNA-PKCS	3	missense	A1112P	DNA-PKCS	1112	1112	A	P	Saturation-Mutagenesis	-1.298	70.5371	-3.175	Deleterious	0.701613	17	deleterious	-1.166	-4.76	41.5369	0.244433	0.559864	9.78409	0.0360783	0.767103	DNA-PKCS_A1112P
DNA-PKCS	3	missense	A1112Q	DNA-PKCS	1112	1112	A	Q	Saturation-Mutagenesis	-0.77	70.5371	-2.509	Deleterious	0.701613	-38	deleterious	-1.262	-3.602	41.5369	0.244433	0.559864	9.78409	0.0360783	0.767103	DNA-PKCS_A1112Q
DNA-PKCS	3	missense	A1112R	DNA-PKCS	1112	1112	A	R	Saturation-Mutagenesis	-2.286	70.5371	-2.142	Neutral	0.701613	-14	deleterious	-1.262	-4.223	41.5369	0.244433	0.559864	9.78409	0.0360783	0.767103	DNA-PKCS_A1112R
DNA-PKCS	3	missense	A1112S	DNA-PKCS	1112	1112	A	S	Saturation-Mutagenesis	-1.714	70.5371	-1.812	Neutral	0.701613	-18	deleterious	-1.262	-1.962	41.5369	0.244433	0.559864	9.78409	0.0360783	0.767103	DNA-PKCS_A1112S
DNA-PKCS	3	missense	A1112T	DNA-PKCS	1112	1112	A	T	Saturation-Mutagenesis	-0.454	70.5371	-2.327	Neutral	0.701613	-24	deleterious	-1.262	-1.948	41.5369	0.244433	0.559864	9.78409	0.0360783	0.767103	DNA-PKCS_A1112T
DNA-PKCS	3	missense	A1112V	DNA-PKCS	1112	1112	A	V	Saturation-Mutagenesis	-0.599	70.5371	-2.394	Neutral	0.701613	13	deleterious	-1.166	-3.537	41.5369	0.244433	0.559864	9.78409	0.0360783	0.767103	DNA-PKCS_A1112V
DNA-PKCS	3	missense	A1112W	DNA-PKCS	1112	1112	A	W	Saturation-Mutagenesis	-0.588	70.5371	-4.639	Deleterious	0.701613	-11	deleterious	-1.166	-3.884	41.5369	0.26181	0.607225	9.91769	0.0364803	0.839075	DNA-PKCS_A1112W
DNA-PKCS	3	missense	A1112Y	DNA-PKCS	1112	1112	A	Y	Saturation-Mutagenesis	-0.975	70.5371	-3.724	Deleterious	0.701613	-1	deleterious	-1.166	-3.978	41.5369	0.26181	0.607225	9.91769	0.0364803	0.839075	DNA-PKCS_A1112Y
DNA-PKCS	3	missense	A1114C	DNA-PKCS	1114	1114	A	C	Saturation-Mutagenesis	-1.231	71.1047	-2.884	Deleterious	0.709239	-50	deleterious	-0.927	-4.469	45.1244	0.273301	0.627967	10.2287	0.0380957	0.873285	DNA-PKCS_A1114C
DNA-PKCS	3	missense	A1114D	DNA-PKCS	1114	1114	A	D	Saturation-Mutagenesis	-1.715	71.1047	-3.363	Deleterious	0.709239	-79	deleterious	-1.298	-3.796	45.1244	0.273301	0.627967	10.2287	0.0380957	0.873285	DNA-PKCS_A1114D
DNA-PKCS	3	missense	A1114E	DNA-PKCS	1114	1114	A	E	Saturation-Mutagenesis	-1.873	71.1047	-2.974	Deleterious	0.709239	-63	deleterious	-1.298	-3.467	45.1244	0.273301	0.627967	10.2287	0.0380957	0.873285	DNA-PKCS_A1114E
DNA-PKCS	3	missense	A1114F	DNA-PKCS	1114	1114	A	F	Saturation-Mutagenesis	-1.425	71.1047	-4.256	Deleterious	0.709239	-6	deleterious	-0.927	-3.76	45.1244	0.273301	0.627967	10.2287	0.0380957	0.873285	DNA-PKCS_A1114F
DNA-PKCS	3	missense	A1114G	DNA-PKCS	1114	1114	A	G	Saturation-Mutagenesis	-1.231	71.1047	-2.176	Neutral	0.709239	-47	deleterious	-0.927	-3.4	45.1244	0.273301	0.627967	10.2287	0.0380957	0.873285	DNA-PKCS_A1114G
DNA-PKCS	3	missense	A1114H	DNA-PKCS	1114	1114	A	H	Saturation-Mutagenesis	-1.403	71.1047	-3.889	Deleterious	0.709239	-48	neutral	-1.298	-2.23	45.1244	0.273301	0.627967	10.2287	0.0380957	0.873285	DNA-PKCS_A1114H
DNA-PKCS	3	missense	A1114I	DNA-PKCS	1114	1114	A	I	Saturation-Mutagenesis	-1.115	71.1047	-3.607	Deleterious	0.709239	-6	deleterious	-0.927	-3.062	45.1244	0.273301	0.627967	10.2287	0.0380957	0.873285	DNA-PKCS_A1114I
DNA-PKCS	3	missense	A1114K	DNA-PKCS	1114	1114	A	K	Saturation-Mutagenesis	-1.614	71.1047	-3.107	Deleterious	0.709239	-82	deleterious	-1.298	-3.447	45.1244	0.273301	0.627967	10.2287	0.0380957	0.873285	DNA-PKCS_A1114K
DNA-PKCS	3	missense	A1114L	DNA-PKCS	1114	1114	A	L	Saturation-Mutagenesis	-0.817	71.1047	-3.607	Deleterious	0.709239	-25	deleterious	-0.927	-3.496	45.1244	0.273301	0.627967	10.2287	0.0380957	0.873285	DNA-PKCS_A1114L
DNA-PKCS	3	missense	A1114M	DNA-PKCS	1114	1114	A	M	Saturation-Mutagenesis	-1.781	71.1047	-3.407	Deleterious	0.709239	47	deleterious	-0.927	-3.349	45.1244	0.273301	0.627967	10.2287	0.0380957	0.873285	DNA-PKCS_A1114M
DNA-PKCS	3	missense	A1114N	DNA-PKCS	1114	1114	A	N	Saturation-Mutagenesis	-1.063	71.1047	-3.171	Deleterious	0.709239	-72	deleterious	-1.298	-4.253	45.1244	0.273301	0.627967	10.2287	0.0380957	0.873285	DNA-PKCS_A1114N
DNA-PKCS	3	missense	A1114P	DNA-PKCS	1114	1114	A	P	Saturation-Mutagenesis	-1.466	71.1047	-3.374	Deleterious	0.709239	-33	deleterious	-0.927	-3.187	45.1244	0.273301	0.627967	10.2287	0.0380957	0.873285	DNA-PKCS_A1114P
DNA-PKCS	3	missense	A1114Q	DNA-PKCS	1114	1114	A	Q	Saturation-Mutagenesis	-1.063	71.1047	-3.074	Deleterious	0.709239	-47	deleterious	-0.927	-3.722	45.1244	0.273301	0.627967	10.2287	0.0380957	0.873285	DNA-PKCS_A1114Q
DNA-PKCS	3	missense	A1114R	DNA-PKCS	1114	1114	A	R	Saturation-Mutagenesis	-2.124	71.1047	-3.274	Deleterious	0.709239	-30	deleterious	-1.298	-3.626	45.1244	0.273301	0.627967	10.2287	0.0380957	0.873285	DNA-PKCS_A1114R
DNA-PKCS	3	missense	A1114S	DNA-PKCS	1114	1114	A	S	Saturation-Mutagenesis	-1.995	71.1047	-1.277	Neutral	0.709239	-60	deleterious	-1.298	-4.677	45.1244	0.273301	0.627967	10.2287	0.0380957	0.873285	DNA-PKCS_A1114S
DNA-PKCS	3	missense	A1114T	DNA-PKCS	1114	1114	A	T	Saturation-Mutagenesis	-0.612	71.1047	-2.032	Neutral	0.709239	-55	deleterious	-1.298	-4.158	45.1244	0.273301	0.627967	10.2287	0.0380957	0.873285	DNA-PKCS_A1114T
DNA-PKCS	3	missense	A1114V	DNA-PKCS	1114	1114	A	V	Saturation-Mutagenesis	-1.079	71.1047	-2.925	Deleterious	0.709239	-44	deleterious	-0.927	-2.259	45.1244	0.273301	0.627967	10.2287	0.0380957	0.873285	DNA-PKCS_A1114V
DNA-PKCS	3	missense	A1114W	DNA-PKCS	1114	1114	A	W	Saturation-Mutagenesis	-0.983	71.1047	-4.912	Deleterious	0.709239	-8	deleterious	-0.927	-3.729	45.1244	0.310471	0.698828	10.9056	0.042015	0.965156	DNA-PKCS_A1114W
DNA-PKCS	3	missense	A1114Y	DNA-PKCS	1114	1114	A	Y	Saturation-Mutagenesis	-0.892	71.1047	-4.189	Deleterious	0.709239	-31	deleterious	-0.927	-5.031	45.1244	0.310471	0.698828	10.9056	0.042015	0.965156	DNA-PKCS_A1114Y
DNA-PKCS	3	missense	A1116C	DNA-PKCS	1116	1116	A	C	Saturation-Mutagenesis	-0.858	72.5251	-2.005	Neutral	0.709239	-4	deleterious	-1.229	-3.893	43.466	0.310471	0.698828	10.9056	0.042015	0.965156	DNA-PKCS_A1116C
DNA-PKCS	3	missense	A1116D	DNA-PKCS	1116	1116	A	D	Saturation-Mutagenesis	-1.399	72.5251	-0.803	Neutral	0.709239	-31	deleterious	-1.578	-4.059	43.466	0.310471	0.698828	10.9056	0.042015	0.965156	DNA-PKCS_A1116D
DNA-PKCS	3	missense	A1116E	DNA-PKCS	1116	1116	A	E	Saturation-Mutagenesis	-1.543	72.5251	-0.679	Neutral	0.709239	16	deleterious	-1.578	-3.732	43.466	0.310471	0.698828	10.9056	0.042015	0.965156	DNA-PKCS_A1116E
DNA-PKCS	3	missense	A1116F	DNA-PKCS	1116	1116	A	F	Saturation-Mutagenesis	0.666	72.5251	-2.443	Neutral	0.709239	-29	deleterious	-1.229	-3.594	43.466	0.310471	0.698828	10.9056	0.042015	0.965156	DNA-PKCS_A1116F
DNA-PKCS	3	missense	A1116G	DNA-PKCS	1116	1116	A	G	Saturation-Mutagenesis	-0.858	72.5251	-1.23	Neutral	0.709239	-74	deleterious	-1.229	-3.676	43.466	0.310471	0.698828	10.9056	0.042015	0.965156	DNA-PKCS_A1116G
DNA-PKCS	3	missense	A1116H	DNA-PKCS	1116	1116	A	H	Saturation-Mutagenesis	-1.034	72.5251	-1.522	Neutral	0.709239	6	neutral	-1.578	-1.755	43.466	0.310471	0.698828	10.9056	0.042015	0.965156	DNA-PKCS_A1116H
DNA-PKCS	3	missense	A1116I	DNA-PKCS	1116	1116	A	I	Saturation-Mutagenesis	-0.676	72.5251	-2.268	Neutral	0.709239	-41	deleterious	-1.229	-4.062	43.466	0.310471	0.698828	10.9056	0.042015	0.965156	DNA-PKCS_A1116I
DNA-PKCS	3	missense	A1116K	DNA-PKCS	1116	1116	A	K	Saturation-Mutagenesis	-1.213	72.5251	-1.073	Neutral	0.709239	6	neutral	-1.578	-2.084	43.466	0.310471	0.698828	10.9056	0.042015	0.965156	DNA-PKCS_A1116K
DNA-PKCS	3	missense	A1116L	DNA-PKCS	1116	1116	A	L	Saturation-Mutagenesis	-1.006	72.5251	-2.235	Neutral	0.709239	-36	deleterious	-1.229	-4.098	43.466	0.310471	0.698828	10.9056	0.042015	0.965156	DNA-PKCS_A1116L
DNA-PKCS	3	missense	A1116M	DNA-PKCS	1116	1116	A	M	Saturation-Mutagenesis	0.109	72.5251	-1.861	Neutral	0.709239	34	deleterious	-1.229	-4.576	43.466	0.310471	0.698828	10.9056	0.042015	0.965156	DNA-PKCS_A1116M
DNA-PKCS	3	missense	A1116N	DNA-PKCS	1116	1116	A	N	Saturation-Mutagenesis	-0.711	72.5251	-0.845	Neutral	0.709239	44	deleterious	-1.229	-4.844	43.466	0.310471	0.698828	10.9056	0.042015	0.965156	DNA-PKCS_A1116N
DNA-PKCS	3	missense	A1116P	DNA-PKCS	1116	1116	A	P	Saturation-Mutagenesis	-1.129	72.5251	-1.854	Neutral	0.709239	-85	deleterious	-1.229	-3.549	43.466	0.310471	0.698828	10.9056	0.042015	0.965156	DNA-PKCS_A1116P
DNA-PKCS	3	missense	A1116Q	DNA-PKCS	1116	1116	A	Q	Saturation-Mutagenesis	-0.711	72.5251	-1.1	Neutral	0.709239	25	deleterious	-1.229	-3.656	43.466	0.310471	0.698828	10.9056	0.042015	0.965156	DNA-PKCS_A1116Q
DNA-PKCS	3	missense	A1116R	DNA-PKCS	1116	1116	A	R	Saturation-Mutagenesis	-2.128	72.5251	-1.28	Neutral	0.709239	51	deleterious	-1.578	-2.957	43.466	0.310471	0.698828	10.9056	0.042015	0.965156	DNA-PKCS_A1116R
DNA-PKCS	3	missense	A1116S	DNA-PKCS	1116	1116	A	S	Saturation-Mutagenesis	-1.642	72.5251	0.102	Neutral	0.709239	-18	deleterious	-1.578	-3.97	43.466	0.310471	0.698828	10.9056	0.042015	0.965156	DNA-PKCS_A1116S
DNA-PKCS	3	missense	A1116T	DNA-PKCS	1116	1116	A	T	Saturation-Mutagenesis	-0.335	72.5251	-0.155	Neutral	0.709239	-29	deleterious	-1.229	-4.054	43.466	0.310471	0.698828	10.9056	0.042015	0.965156	DNA-PKCS_A1116T
DNA-PKCS	3	missense	A1116V	DNA-PKCS	1116	1116	A	V	Saturation-Mutagenesis	-0.686	72.5251	-1.753	Neutral	0.709239	-85	deleterious	-1.229	-3.207	43.466	0.310471	0.698828	10.9056	0.042015	0.965156	DNA-PKCS_A1116V
DNA-PKCS	3	missense	A1116W	DNA-PKCS	1116	1116	A	W	Saturation-Mutagenesis	-0.47	72.5251	-3.046	Deleterious	0.710737	-35	deleterious	-1.229	-2.863	43.466	0.333762	0.732736	11.6103	0.0430334	1.00914	DNA-PKCS_A1116W
DNA-PKCS	3	missense	A1116Y	DNA-PKCS	1116	1116	A	Y	Saturation-Mutagenesis	0.135	72.5251	-2.236	Neutral	0.709239	-41	deleterious	-1.229	-3.89	43.466	0.333762	0.732736	11.6103	0.0430334	1.00914	DNA-PKCS_A1116Y
DNA-PKCS	3	missense	A1130C	DNA-PKCS	1130	1130	A	C	Saturation-Mutagenesis	-1.428	60.5266	-2.457	Neutral	0.728417	-6	deleterious	-1.372	-4.137	53.6305	0.242901	0.589825	10.2524	0.0367236	0.846679	DNA-PKCS_A1130C
DNA-PKCS	3	missense	A1130D	DNA-PKCS	1130	1130	A	D	Saturation-Mutagenesis	-1.934	60.5266	-3.548	Deleterious	0.728417	-36	deleterious	-1.372	-2.811	53.6305	0.242901	0.589825	10.2524	0.0367236	0.846679	DNA-PKCS_A1130D
DNA-PKCS	3	missense	A1130E	DNA-PKCS	1130	1130	A	E	Saturation-Mutagenesis	-2.061	60.5266	-2.802	Deleterious	0.728417	5	deleterious	-1.372	-3.345	53.6305	0.242901	0.589825	10.2524	0.0367236	0.846679	DNA-PKCS_A1130E
DNA-PKCS	3	missense	A1130F	DNA-PKCS	1130	1130	A	F	Saturation-Mutagenesis	-1.083	60.5266	-3.519	Deleterious	0.728417	17	deleterious	-1.573	-3.261	53.6305	0.242901	0.589825	10.2524	0.0367236	0.846679	DNA-PKCS_A1130F
DNA-PKCS	3	missense	A1130G	DNA-PKCS	1130	1130	A	G	Saturation-Mutagenesis	-1.428	60.5266	-2.455	Neutral	0.728417	-68	deleterious	-1.573	-4.029	53.6305	0.242901	0.589825	10.2524	0.0367236	0.846679	DNA-PKCS_A1130G
DNA-PKCS	3	missense	A1130H	DNA-PKCS	1130	1130	A	H	Saturation-Mutagenesis	-1.702	60.5266	-3.683	Deleterious	0.728417	-12	deleterious	-1.372	-3.287	53.6305	0.242901	0.589825	10.2524	0.0367236	0.846679	DNA-PKCS_A1130H
DNA-PKCS	3	missense	A1130I	DNA-PKCS	1130	1130	A	I	Saturation-Mutagenesis	-1.287	60.5266	-2.239	Neutral	0.728417	-36	deleterious	-1.573	-3.797	53.6305	0.242901	0.589825	10.2524	0.0367236	0.846679	DNA-PKCS_A1130I
DNA-PKCS	3	missense	A1130K	DNA-PKCS	1130	1130	A	K	Saturation-Mutagenesis	-1.896	60.5266	-2.402	Neutral	0.728417	-2	deleterious	-1.372	-3.864	53.6305	0.242901	0.589825	10.2524	0.0367236	0.846679	DNA-PKCS_A1130K
DNA-PKCS	3	missense	A1130L	DNA-PKCS	1130	1130	A	L	Saturation-Mutagenesis	-1.49	60.5266	-2.605	Deleterious	0.728417	-24	deleterious	-1.573	-3.682	53.6305	0.242901	0.589825	10.2524	0.0367236	0.846679	DNA-PKCS_A1130L
DNA-PKCS	3	missense	A1130M	DNA-PKCS	1130	1130	A	M	Saturation-Mutagenesis	-2.214	60.5266	-2.47	Neutral	0.728417	27	neutral	-1.573	-2.49	53.6305	0.242901	0.589825	10.2524	0.0367236	0.846679	DNA-PKCS_A1130M
DNA-PKCS	3	missense	A1130N	DNA-PKCS	1130	1130	A	N	Saturation-Mutagenesis	-1.272	60.5266	-3.28	Deleterious	0.728417	37	deleterious	-1.372	-4.483	53.6305	0.242901	0.589825	10.2524	0.0367236	0.846679	DNA-PKCS_A1130N
DNA-PKCS	3	missense	A1130P	DNA-PKCS	1130	1130	A	P	Saturation-Mutagenesis	-1.487	60.5266	-3.003	Deleterious	0.728417	-81	deleterious	-1.573	-4.808	53.6305	0.242901	0.589825	10.2524	0.0367236	0.846679	DNA-PKCS_A1130P
DNA-PKCS	3	missense	A1130Q	DNA-PKCS	1130	1130	A	Q	Saturation-Mutagenesis	-1.272	60.5266	-2.802	Deleterious	0.728417	15	deleterious	-1.372	-4.041	53.6305	0.242901	0.589825	10.2524	0.0367236	0.846679	DNA-PKCS_A1130Q
DNA-PKCS	3	missense	A1130R	DNA-PKCS	1130	1130	A	R	Saturation-Mutagenesis	-2.087	60.5266	-2.903	Deleterious	0.728417	41	deleterious	-1.372	-4.001	53.6305	0.242901	0.589825	10.2524	0.0367236	0.846679	DNA-PKCS_A1130R
DNA-PKCS	2	missense	A1130S	DNA-PKCS	1130	1130	A	S	Non-Pathogenic	-2.033	60.5266	-1.501	Neutral	0.728417	-29	deleterious	-1.372	-3.601	53.6305	0.242901	0.589825	10.2524	0.0367236	0.846679	DNA-PKCS_A1130S
DNA-PKCS	3	missense	A1130T	DNA-PKCS	1130	1130	A	T	Saturation-Mutagenesis	-0.848	60.5266	-1.753	Neutral	0.728417	-36	deleterious	-1.372	-3.199	53.6305	0.242901	0.589825	10.2524	0.0367236	0.846679	DNA-PKCS_A1130T
DNA-PKCS	3	missense	A1130V	DNA-PKCS	1130	1130	A	V	Saturation-Mutagenesis	-1.223	60.5266	-1.459	Neutral	0.728417	-83	deleterious	-1.573	-3.67	53.6305	0.242901	0.589825	10.2524	0.0367236	0.846679	DNA-PKCS_A1130V
DNA-PKCS	3	missense	A1130W	DNA-PKCS	1130	1130	A	W	Saturation-Mutagenesis	-1.404	60.5266	-4.434	Deleterious	0.728417	13	deleterious	-1.573	-4.112	53.6305	0.259341	0.835488	11.1885	0.035713	0.79967	DNA-PKCS_A1130W
DNA-PKCS	3	missense	A1130Y	DNA-PKCS	1130	1130	A	Y	Saturation-Mutagenesis	-2.109	60.5266	-3.452	Deleterious	0.728417	-12	deleterious	-1.573	-3.916	53.6305	0.259341	0.835488	11.1885	0.035713	0.79967	DNA-PKCS_A1130Y
DNA-PKCS	3	missense	A1148C	DNA-PKCS	1148	1148	A	C	Saturation-Mutagenesis	-1.036	79.126	-2.068	Neutral	0.745954	-44	deleterious	-1.445	-3.434	60.6626	0.169877	0.523123	9.35838	0.0314674	0.485483	DNA-PKCS_A1148C
DNA-PKCS	3	missense	A1148D	DNA-PKCS	1148	1148	A	D	Saturation-Mutagenesis	-1.4	79.126	-0.769	Neutral	0.745954	-42	deleterious	-1.445	-5.137	60.6626	0.169877	0.523123	9.35838	0.0314674	0.485483	DNA-PKCS_A1148D
DNA-PKCS	3	missense	A1148E	DNA-PKCS	1148	1148	A	E	Saturation-Mutagenesis	-1.525	79.126	-0.156	Neutral	0.745954	-45	deleterious	-1.445	-3.305	60.6626	0.169877	0.523123	9.35838	0.0314674	0.485483	DNA-PKCS_A1148E
DNA-PKCS	3	missense	A1148F	DNA-PKCS	1148	1148	A	F	Saturation-Mutagenesis	-0.08	79.126	-2.414	Neutral	0.745954	-6	deleterious	-1.294	-3.31	60.6626	0.228343	0.615131	10.326	0.0360076	0.662299	DNA-PKCS_A1148F
DNA-PKCS	3	missense	A1148G	DNA-PKCS	1148	1148	A	G	Saturation-Mutagenesis	-1.036	79.126	-1.469	Neutral	0.745954	-34	deleterious	-1.445	-4.524	60.6626	0.228343	0.615131	10.326	0.0360076	0.662299	DNA-PKCS_A1148G
DNA-PKCS	3	missense	A1148H	DNA-PKCS	1148	1148	A	H	Saturation-Mutagenesis	-1	79.126	-1.309	Neutral	0.745954	-43	neutral	-1.445	-2.492	60.6626	0.169877	0.523123	9.35838	0.0314674	0.485483	DNA-PKCS_A1148H
DNA-PKCS	3	missense	A1148I	DNA-PKCS	1148	1148	A	I	Saturation-Mutagenesis	-0.693	79.126	-2.125	Neutral	0.745954	-19	deleterious	-1.294	-3.711	60.6626	0.228343	0.615131	10.326	0.0360076	0.662299	DNA-PKCS_A1148I
DNA-PKCS	3	missense	A1148K	DNA-PKCS	1148	1148	A	K	Saturation-Mutagenesis	-1.199	79.126	-1.129	Neutral	0.745954	-50	deleterious	-1.445	-2.55	60.6626	0.169877	0.523123	9.35838	0.0314674	0.485483	DNA-PKCS_A1148K
DNA-PKCS	3	missense	A1148L	DNA-PKCS	1148	1148	A	L	Saturation-Mutagenesis	-0.921	79.126	-2.232	Neutral	0.745954	-25	deleterious	-1.294	-4.496	60.6626	0.228343	0.615131	10.326	0.0360076	0.662299	DNA-PKCS_A1148L
DNA-PKCS	3	missense	A1148M	DNA-PKCS	1148	1148	A	M	Saturation-Mutagenesis	-0.671	79.126	-1.794	Neutral	0.745954	28	deleterious	-1.294	-3.273	60.6626	0.228343	0.615131	10.326	0.0360076	0.662299	DNA-PKCS_A1148M
DNA-PKCS	3	missense	A1148N	DNA-PKCS	1148	1148	A	N	Saturation-Mutagenesis	-0.877	79.126	-0.609	Neutral	0.745954	-32	deleterious	-1.445	-3.592	60.6626	0.169877	0.523123	9.35838	0.0314674	0.485483	DNA-PKCS_A1148N
DNA-PKCS	3	missense	A1148P	DNA-PKCS	1148	1148	A	P	Saturation-Mutagenesis	-1.043	79.126	-0.639	Neutral	0.745954	-25	deleterious	-1.445	-4.305	60.6626	0.228343	0.615131	10.326	0.0360076	0.662299	DNA-PKCS_A1148P
DNA-PKCS	3	missense	A1148Q	DNA-PKCS	1148	1148	A	Q	Saturation-Mutagenesis	-0.877	79.126	-0.727	Neutral	0.745954	-32	deleterious	-1.445	-4.023	60.6626	0.169877	0.523123	9.35838	0.0314674	0.485483	DNA-PKCS_A1148Q
DNA-PKCS	3	missense	A1148R	DNA-PKCS	1148	1148	A	R	Saturation-Mutagenesis	-1.963	79.126	-1.504	Neutral	0.745954	-64	deleterious	-1.445	-3.405	60.6626	0.169877	0.523123	9.35838	0.0314674	0.485483	DNA-PKCS_A1148R
DNA-PKCS	3	missense	A1148S	DNA-PKCS	1148	1148	A	S	Saturation-Mutagenesis	-1.429	79.126	0.113	Neutral	0.745954	-31	deleterious	-1.445	-3.718	60.6626	0.169877	0.523123	9.35838	0.0314674	0.485483	DNA-PKCS_A1148S
DNA-PKCS	3	missense	A1148T	DNA-PKCS	1148	1148	A	T	Saturation-Mutagenesis	-0.458	79.126	-0.654	Neutral	0.745954	-26	deleterious	-1.445	-3.115	60.6626	0.169877	0.523123	9.35838	0.0314674	0.485483	DNA-PKCS_A1148T
DNA-PKCS	3	missense	A1148V	DNA-PKCS	1148	1148	A	V	Saturation-Mutagenesis	-0.676	79.126	-1.612	Neutral	0.745954	-25	deleterious	-1.445	-4.146	60.6626	0.228343	0.615131	10.326	0.0360076	0.662299	DNA-PKCS_A1148V
DNA-PKCS	3	missense	A1148W	DNA-PKCS	1148	1148	A	W	Saturation-Mutagenesis	-0.181	79.126	-3.192	Deleterious	0.745954	-14	deleterious	-1.294	-2.159	60.6626	0.228343	0.615131	10.326	0.0360076	0.662299	DNA-PKCS_A1148W
DNA-PKCS	3	missense	A1148Y	DNA-PKCS	1148	1148	A	Y	Saturation-Mutagenesis	-0.118	79.126	-2.175	Neutral	0.745954	-20	deleterious	-1.294	-3.256	60.6626	0.228343	0.615131	10.326	0.0360076	0.662299	DNA-PKCS_A1148Y
DNA-PKCS	3	missense	A1161C	DNA-PKCS	1161	1161	A	C	Saturation-Mutagenesis	-0.949	80.4998	-1.075	Neutral	0.815534	-41	deleterious	-0.974	-2.817	49.3614	0.791862	1.89099	20.1265	0.0708309	2.60168	DNA-PKCS_A1161C
DNA-PKCS	3	missense	A1161D	DNA-PKCS	1161	1161	A	D	Saturation-Mutagenesis	-0.666	80.4998	-0.661	Neutral	0.815534	18	deleterious	-0.974	-3.153	49.3614	0.791862	1.89099	20.1265	0.0708309	2.60168	DNA-PKCS_A1161D
DNA-PKCS	3	missense	A1161E	DNA-PKCS	1161	1161	A	E	Saturation-Mutagenesis	-0.668	80.4998	-0.201	Neutral	0.815534	-6	deleterious	-0.974	-3.124	49.3614	0.791862	1.89099	20.1265	0.0708309	2.60168	DNA-PKCS_A1161E
DNA-PKCS	3	missense	A1161F	DNA-PKCS	1161	1161	A	F	Saturation-Mutagenesis	0.427	80.4998	-1.504	Neutral	0.815534	-64	deleterious	-0.974	-3.976	49.3614	1.2333	2.48141	23.6455	0.0949351	3.46196	DNA-PKCS_A1161F
DNA-PKCS	3	missense	A1161G	DNA-PKCS	1161	1161	A	G	Saturation-Mutagenesis	-0.949	80.4998	-0.617	Neutral	0.815534	22	deleterious	-0.974	-3.564	49.3614	1.2333	2.48141	23.6455	0.0949351	3.46196	DNA-PKCS_A1161G
DNA-PKCS	3	missense	A1161H	DNA-PKCS	1161	1161	A	H	Saturation-Mutagenesis	-0.405	80.4998	-1.311	Neutral	0.815534	-30	deleterious	-0.974	-4.364	49.3614	0.791862	1.89099	20.1265	0.0708309	2.60168	DNA-PKCS_A1161H
DNA-PKCS	3	missense	A1161I	DNA-PKCS	1161	1161	A	I	Saturation-Mutagenesis	-0.494	80.4998	-1.593	Neutral	0.815534	-64	deleterious	-0.974	-3.694	49.3614	1.2333	2.48141	23.6455	0.0949351	3.46196	DNA-PKCS_A1161I
DNA-PKCS	3	missense	A1161K	DNA-PKCS	1161	1161	A	K	Saturation-Mutagenesis	-0.526	80.4998	-0.45	Neutral	0.815534	39	deleterious	-0.974	-3.141	49.3614	0.791862	1.89099	20.1265	0.0708309	2.60168	DNA-PKCS_A1161K
DNA-PKCS	3	missense	A1161L	DNA-PKCS	1161	1161	A	L	Saturation-Mutagenesis	-0.48	80.4998	-1.354	Neutral	0.815534	-40	deleterious	-0.974	-3.267	49.3614	1.2333	2.48141	23.6455	0.0949351	3.46196	DNA-PKCS_A1161L
DNA-PKCS	3	missense	A1161M	DNA-PKCS	1161	1161	A	M	Saturation-Mutagenesis	-0.063	80.4998	-0.966	Neutral	0.815534	-62	deleterious	-0.974	-4.389	49.3614	1.2333	2.48141	23.6455	0.0949351	3.46196	DNA-PKCS_A1161M
DNA-PKCS	3	missense	A1161N	DNA-PKCS	1161	1161	A	N	Saturation-Mutagenesis	-0.878	80.4998	-0.969	Neutral	0.815534	-87	deleterious	-0.974	-3.583	49.3614	0.791862	1.89099	20.1265	0.0708309	2.60168	DNA-PKCS_A1161N
DNA-PKCS	3	missense	A1161P	DNA-PKCS	1161	1161	A	P	Saturation-Mutagenesis	-0.835	80.4998	-1.58	Neutral	0.815534	-59	deleterious	-0.974	-2.537	49.3614	1.2333	2.48141	23.6455	0.0949351	3.46196	DNA-PKCS_A1161P
DNA-PKCS	3	missense	A1161Q	DNA-PKCS	1161	1161	A	Q	Saturation-Mutagenesis	-0.878	80.4998	-0.43	Neutral	0.815534	-47	deleterious	-0.974	-4.546	49.3614	0.791862	1.89099	20.1265	0.0708309	2.60168	DNA-PKCS_A1161Q
DNA-PKCS	3	missense	A1161R	DNA-PKCS	1161	1161	A	R	Saturation-Mutagenesis	-0.268	80.4998	-0.951	Neutral	0.815534	-26	deleterious	-0.974	-3.617	49.3614	0.791862	1.89099	20.1265	0.0708309	2.60168	DNA-PKCS_A1161R
DNA-PKCS	2	missense	A1161S	DNA-PKCS	1161	1161	A	S	Non-Pathogenic	-0.538	80.4998	-0.103	Neutral	0.815534	-70	deleterious	-0.974	-2.88	49.3614	0.791862	1.89099	20.1265	0.0708309	2.60168	DNA-PKCS_A1161S
DNA-PKCS	2	missense	A1161T	DNA-PKCS	1161	1161	A	T	Non-Pathogenic	-0.672	80.4998	-0.324	Neutral	0.815534	-86	deleterious	-0.974	-3.132	49.3614	0.791862	1.89099	20.1265	0.0708309	2.60168	DNA-PKCS_A1161T
DNA-PKCS	3	missense	A1161V	DNA-PKCS	1161	1161	A	V	Saturation-Mutagenesis	-0.513	80.4998	-1.191	Neutral	0.815534	-65	deleterious	-0.974	-3.438	49.3614	1.2333	2.48141	23.6455	0.0949351	3.46196	DNA-PKCS_A1161V
DNA-PKCS	3	missense	A1161W	DNA-PKCS	1161	1161	A	W	Saturation-Mutagenesis	-0.455	80.4998	-0.81	Neutral	0.795796	-57	deleterious	-1.16	-3.952	49.3614	1.2333	2.48141	23.6455	0.0949351	3.46196	DNA-PKCS_A1161W
DNA-PKCS	3	missense	A1161Y	DNA-PKCS	1161	1161	A	Y	Saturation-Mutagenesis	-0.445	80.4998	-1.405	Neutral	0.815534	-64	deleterious	-0.974	-4.072	49.3614	1.2333	2.48141	23.6455	0.0949351	3.46196	DNA-PKCS_A1161Y
DNA-PKCS	3	missense	A1174C	DNA-PKCS	1174	1174	A	C	Saturation-Mutagenesis	-0.529	75.5487	-2.265	Neutral	0.809331	4	neutral	-1.988	-3.345	44.8884	0.258497	0.580877	10.446	0.0378422	0.894884	DNA-PKCS_A1174C
DNA-PKCS	2	missense	A1174D	DNA-PKCS	1174	1174	A	D	Non-Pathogenic	-0.571	75.5487	-1.982	Neutral	0.809331	-24	deleterious	-0.87	-3.976	44.8884	0.258497	0.580877	10.446	0.0378422	0.894884	DNA-PKCS_A1174D
DNA-PKCS	3	missense	A1174E	DNA-PKCS	1174	1174	A	E	Saturation-Mutagenesis	-0.542	75.5487	-0.857	Neutral	0.809331	-28	deleterious	-0.87	-4.072	44.8884	0.258497	0.580877	10.446	0.0378422	0.894884	DNA-PKCS_A1174E
DNA-PKCS	3	missense	A1174F	DNA-PKCS	1174	1174	A	F	Saturation-Mutagenesis	-0.91	75.5487	-2.972	Deleterious	0.809331	30	neutral	-1.988	-1.015	44.8884	0.294138	0.734254	11.1501	0.0418388	1.02825	DNA-PKCS_A1174F
DNA-PKCS	3	missense	A1174G	DNA-PKCS	1174	1174	A	G	Saturation-Mutagenesis	-0.529	75.5487	-1.804	Neutral	0.809331	65	neutral	-1.988	-3.102	44.8884	0.294138	0.734254	11.1501	0.0418388	1.02825	DNA-PKCS_A1174G
DNA-PKCS	3	missense	A1174H	DNA-PKCS	1174	1174	A	H	Saturation-Mutagenesis	-0.168	75.5487	-2.137	Neutral	0.809331	-30	deleterious	-0.87	-3.042	44.8884	0.258497	0.580877	10.446	0.0378422	0.894884	DNA-PKCS_A1174H
DNA-PKCS	3	missense	A1174I	DNA-PKCS	1174	1174	A	I	Saturation-Mutagenesis	0.137	75.5487	-2.293	Neutral	0.809331	28	deleterious	-1.988	-4.422	44.8884	0.294138	0.734254	11.1501	0.0418388	1.02825	DNA-PKCS_A1174I
DNA-PKCS	3	missense	A1174K	DNA-PKCS	1174	1174	A	K	Saturation-Mutagenesis	-0.278	75.5487	-0.89	Neutral	0.809331	-60	deleterious	-0.87	-4.389	44.8884	0.258497	0.580877	10.446	0.0378422	0.894884	DNA-PKCS_A1174K
DNA-PKCS	3	missense	A1174L	DNA-PKCS	1174	1174	A	L	Saturation-Mutagenesis	0.078	75.5487	-2.226	Neutral	0.809331	66	neutral	-1.988	-2.87	44.8884	0.294138	0.734254	11.1501	0.0418388	1.02825	DNA-PKCS_A1174L
DNA-PKCS	3	missense	A1174M	DNA-PKCS	1174	1174	A	M	Saturation-Mutagenesis	-1.135	75.5487	-1.858	Neutral	0.809331	28	deleterious	-1.988	-3.617	44.8884	0.294138	0.734254	11.1501	0.0418388	1.02825	DNA-PKCS_A1174M
DNA-PKCS	3	missense	A1174N	DNA-PKCS	1174	1174	A	N	Saturation-Mutagenesis	-0.453	75.5487	-1.66	Neutral	0.809331	-24	neutral	-1.988	-3.362	44.8884	0.258497	0.580877	10.446	0.0378422	0.894884	DNA-PKCS_A1174N
DNA-PKCS	2	missense	A1174P	DNA-PKCS	1174	1174	A	P	Non-Pathogenic	-0.262	75.5487	-2.023	Neutral	0.809331	35	deleterious	-1.988	-3.659	44.8884	0.294138	0.734254	11.1501	0.0418388	1.02825	DNA-PKCS_A1174P
DNA-PKCS	3	missense	A1174Q	DNA-PKCS	1174	1174	A	Q	Saturation-Mutagenesis	-0.453	75.5487	-0.89	Neutral	0.809331	21	deleterious	-1.988	-3.532	44.8884	0.258497	0.580877	10.446	0.0378422	0.894884	DNA-PKCS_A1174Q
DNA-PKCS	3	missense	A1174R	DNA-PKCS	1174	1174	A	R	Saturation-Mutagenesis	-0.829	75.5487	-0.923	Neutral	0.809331	-42	deleterious	-0.87	-3.469	44.8884	0.258497	0.580877	10.446	0.0378422	0.894884	DNA-PKCS_A1174R
DNA-PKCS	3	missense	A1174S	DNA-PKCS	1174	1174	A	S	Saturation-Mutagenesis	-0.163	75.5487	-0.726	Neutral	0.809331	-26	deleterious	-1.988	-3.67	44.8884	0.258497	0.580877	10.446	0.0378422	0.894884	DNA-PKCS_A1174S
DNA-PKCS	3	missense	A1174T	DNA-PKCS	1174	1174	A	T	Saturation-Mutagenesis	-0.274	75.5487	-0.776	Neutral	0.809331	-2	deleterious	-1.988	-4.585	44.8884	0.258497	0.580877	10.446	0.0378422	0.894884	DNA-PKCS_A1174T
DNA-PKCS	2	missense	A1174V	DNA-PKCS	1174	1174	A	V	Non-Pathogenic	0.123	75.5487	-1.545	Neutral	0.809331	13	deleterious	-1.988	-3.805	44.8884	0.294138	0.734254	11.1501	0.0418388	1.02825	DNA-PKCS_A1174V
DNA-PKCS	3	missense	A1174W	DNA-PKCS	1174	1174	A	W	Saturation-Mutagenesis	-0.826	75.5487	-3.197	Deleterious	0.809331	38	neutral	-1.988	-3.57	44.8884	0.294138	0.734254	11.1501	0.0418388	1.02825	DNA-PKCS_A1174W
DNA-PKCS	3	missense	A1174Y	DNA-PKCS	1174	1174	A	Y	Saturation-Mutagenesis	-0.753	75.5487	-2.638	Deleterious	0.809331	-4	neutral	-1.988	-3.128	44.8884	0.294138	0.734254	11.1501	0.0418388	1.02825	DNA-PKCS_A1174Y
DNA-PKCS	3	missense	A120C	DNA-PKCS	120	120	A	C	Saturation-Mutagenesis	-0.01	6.04742	-1.532	Neutral	0.982885	-74	deleterious	-1.579	-3.933	106.86	0.341191	0.870675	12.8797	0.0488333	1.10465	DNA-PKCS_A120C
DNA-PKCS	3	missense	A120D	DNA-PKCS	120	120	A	D	Saturation-Mutagenesis	0.803	6.04742	-1.954	Neutral	0.982885	4	neutral	-1.579	-2.552	106.86	0.341191	0.870675	12.8797	0.0488333	1.10465	DNA-PKCS_A120D
DNA-PKCS	3	missense	A120E	DNA-PKCS	120	120	A	E	Saturation-Mutagenesis	0.413	6.04742	-1.36	Neutral	0.982885	-6	deleterious	-1.579	-5.049	106.86	0.341191	0.870675	12.8797	0.0488333	1.10465	DNA-PKCS_A120E
DNA-PKCS	3	missense	A120F	DNA-PKCS	120	120	A	F	Saturation-Mutagenesis	1.126	6.04742	-2.041	Neutral	0.982885	41	neutral	-1.896	-2.169	106.86	0.341191	0.870675	12.8797	0.0488333	1.10465	DNA-PKCS_A120F
DNA-PKCS	3	missense	A120G	DNA-PKCS	120	120	A	G	Saturation-Mutagenesis	0.248	6.04742	-1.586	Neutral	0.982885	-75	deleterious	-1.579	-3.359	106.86	0.341191	0.870675	12.8797	0.0488333	1.10465	DNA-PKCS_A120G
DNA-PKCS	3	missense	A120H	DNA-PKCS	120	120	A	H	Saturation-Mutagenesis	0.534	6.04742	-1.875	Neutral	0.982885	-7	deleterious	-1.579	-3.484	106.86	0.341191	0.870675	12.8797	0.0488333	1.10465	DNA-PKCS_A120H
DNA-PKCS	3	missense	A120I	DNA-PKCS	120	120	A	I	Saturation-Mutagenesis	0.325	6.04742	-1.66	Neutral	0.982885	48	neutral	-1.579	-2.566	106.86	0.341191	0.870675	12.8797	0.0488333	1.10465	DNA-PKCS_A120I
DNA-PKCS	3	missense	A120K	DNA-PKCS	120	120	A	K	Saturation-Mutagenesis	0.821	6.04742	-1.326	Neutral	0.982885	33	deleterious	-1.579	-3.44	106.86	0.341191	0.870675	12.8797	0.0488333	1.10465	DNA-PKCS_A120K
DNA-PKCS	3	missense	A120L	DNA-PKCS	120	120	A	L	Saturation-Mutagenesis	0.762	6.04742	-1.593	Neutral	0.982885	39	deleterious	-1.24	-3.114	106.86	0.341191	0.870675	12.8797	0.0488333	1.10465	DNA-PKCS_A120L
DNA-PKCS	3	missense	A120M	DNA-PKCS	120	120	A	M	Saturation-Mutagenesis	1.102	6.04742	-1.393	Neutral	0.982885	28	deleterious	-1.172	-3.8	106.86	0.341191	0.870675	12.8797	0.0488333	1.10465	DNA-PKCS_A120M
DNA-PKCS	3	missense	A120N	DNA-PKCS	120	120	A	N	Saturation-Mutagenesis	0.631	6.04742	-1.633	Neutral	0.982885	21	deleterious	-1.579	-3.141	106.86	0.341191	0.870675	12.8797	0.0488333	1.10465	DNA-PKCS_A120N
DNA-PKCS	3	missense	A120P	DNA-PKCS	120	120	A	P	Saturation-Mutagenesis	0.248	6.04742	-1.86	Neutral	0.982885	-20	deleterious	-1.579	-4.481	106.86	0.341191	0.870675	12.8797	0.0488333	1.10465	DNA-PKCS_A120P
DNA-PKCS	3	missense	A120Q	DNA-PKCS	120	120	A	Q	Saturation-Mutagenesis	0.921	6.04742	-1.293	Neutral	0.982885	-50	deleterious	-1.579	-3.557	106.86	0.341191	0.870675	12.8797	0.0488333	1.10465	DNA-PKCS_A120Q
DNA-PKCS	3	missense	A120R	DNA-PKCS	120	120	A	R	Saturation-Mutagenesis	0.947	6.04742	-1.326	Neutral	0.982885	27	deleterious	-1.579	-3.276	106.86	0.341191	0.870675	12.8797	0.0488333	1.10465	DNA-PKCS_A120R
DNA-PKCS	3	missense	A120S	DNA-PKCS	120	120	A	S	Saturation-Mutagenesis	0.456	6.04742	-0.363	Neutral	0.982885	58	deleterious	-1.579	-3.38	106.86	0.341191	0.870675	12.8797	0.0488333	1.10465	DNA-PKCS_A120S
DNA-PKCS	3	missense	A120T	DNA-PKCS	120	120	A	T	Saturation-Mutagenesis	0.414	6.04742	-0.775	Neutral	0.982885	44	deleterious	-1.579	-3.77	106.86	0.341191	0.870675	12.8797	0.0488333	1.10465	DNA-PKCS_A120T
DNA-PKCS	3	missense	A120V	DNA-PKCS	120	120	A	V	Saturation-Mutagenesis	0.325	6.04742	-1.345	Neutral	0.982885	-15	deleterious	-1.579	-3.889	106.86	0.341191	0.870675	12.8797	0.0488333	1.10465	DNA-PKCS_A120V
DNA-PKCS	3	missense	A120W	DNA-PKCS	120	120	A	W	Saturation-Mutagenesis	-0.265	6.04742	-2.602	Deleterious	0.982885	31	deleterious	-0.941	-3.808	106.86	0.341191	0.870675	12.8797	0.0488333	1.10465	DNA-PKCS_A120W
DNA-PKCS	3	missense	A120Y	DNA-PKCS	120	120	A	Y	Saturation-Mutagenesis	1.199	6.04742	-1.875	Neutral	0.982885	38	neutral	-1.833	-2.584	106.86	0.341191	0.870675	12.8797	0.0488333	1.10465	DNA-PKCS_A120Y
DNA-PKCS	3	missense	A121C	DNA-PKCS	121	121	A	C	Saturation-Mutagenesis	-0.318	2.93251	-2.127	Neutral	0.982885	58	deleterious	-0.941	-3.683	106.767	0.320002	0.689863	12.6011	0.0474327	1.00217	DNA-PKCS_A121C
DNA-PKCS	3	missense	A121D	DNA-PKCS	121	121	A	D	Saturation-Mutagenesis	0.346	2.93251	-2.824	Deleterious	0.982885	18	deleterious	-0.941	-3.765	106.767	0.320002	0.689863	12.6011	0.0474327	1.00217	DNA-PKCS_A121D
DNA-PKCS	3	missense	A121E	DNA-PKCS	121	121	A	E	Saturation-Mutagenesis	0.163	2.93251	-2.342	Neutral	0.982885	36	deleterious	-0.941	-3.486	106.767	0.320002	0.689863	12.6011	0.0474327	1.00217	DNA-PKCS_A121E
DNA-PKCS	3	missense	A121F	DNA-PKCS	121	121	A	F	Saturation-Mutagenesis	0.865	2.93251	-3.057	Deleterious	0.982885	-62	deleterious	-0.941	-3.812	106.767	0.320002	0.689863	12.6011	0.0474327	1.00217	DNA-PKCS_A121F
DNA-PKCS	3	missense	A121G	DNA-PKCS	121	121	A	G	Saturation-Mutagenesis	-0.146	2.93251	-1.927	Neutral	0.982885	55	deleterious	-0.941	-3.98	106.767	0.320002	0.689863	12.6011	0.0474327	1.00217	DNA-PKCS_A121G
DNA-PKCS	3	missense	A121H	DNA-PKCS	121	121	A	H	Saturation-Mutagenesis	0.107	2.93251	-2.59	Deleterious	0.982885	6	deleterious	-0.941	-3.557	106.767	0.320002	0.689863	12.6011	0.0474327	1.00217	DNA-PKCS_A121H
DNA-PKCS	3	missense	A121I	DNA-PKCS	121	121	A	I	Saturation-Mutagenesis	-0.096	2.93251	-2.575	Deleterious	0.982885	82	deleterious	-0.941	-2.76	106.767	0.320002	0.689863	12.6011	0.0474327	1.00217	DNA-PKCS_A121I
DNA-PKCS	3	missense	A121K	DNA-PKCS	121	121	A	K	Saturation-Mutagenesis	0.398	2.93251	-2.342	Neutral	0.982885	10	deleterious	-0.941	-4.019	106.767	0.320002	0.689863	12.6011	0.0474327	1.00217	DNA-PKCS_A121K
DNA-PKCS	3	missense	A121L	DNA-PKCS	121	121	A	L	Saturation-Mutagenesis	0.231	2.93251	-2.475	Neutral	0.982885	-59	deleterious	-0.941	-3.68	106.767	0.320002	0.689863	12.6011	0.0474327	1.00217	DNA-PKCS_A121L
DNA-PKCS	3	missense	A121M	DNA-PKCS	121	121	A	M	Saturation-Mutagenesis	0.807	2.93251	-2.442	Neutral	0.982885	-62	deleterious	-0.941	-3.492	106.767	0.320002	0.689863	12.6011	0.0474327	1.00217	DNA-PKCS_A121M
DNA-PKCS	3	missense	A121N	DNA-PKCS	121	121	A	N	Saturation-Mutagenesis	0.229	2.93251	-2.524	Deleterious	0.982885	45	deleterious	-0.941	-3.999	106.767	0.320002	0.689863	12.6011	0.0474327	1.00217	DNA-PKCS_A121N
DNA-PKCS	3	missense	A121P	DNA-PKCS	121	121	A	P	Saturation-Mutagenesis	-0.146	2.93251	-2.542	Deleterious	0.982885	64	deleterious	-0.941	-2.953	106.767	0.320002	0.689863	12.6011	0.0474327	1.00217	DNA-PKCS_A121P
DNA-PKCS	3	missense	A121Q	DNA-PKCS	121	121	A	Q	Saturation-Mutagenesis	0.445	2.93251	-2.342	Neutral	0.982885	54	deleterious	-0.941	-4.512	106.767	0.320002	0.689863	12.6011	0.0474327	1.00217	DNA-PKCS_A121Q
DNA-PKCS	3	missense	A121R	DNA-PKCS	121	121	A	R	Saturation-Mutagenesis	0.749	2.93251	-2.409	Neutral	0.982885	-10	deleterious	-0.941	-4.78	106.767	0.320002	0.689863	12.6011	0.0474327	1.00217	DNA-PKCS_A121R
DNA-PKCS	3	missense	A121S	DNA-PKCS	121	121	A	S	Saturation-Mutagenesis	0.166	2.93251	-1.079	Neutral	0.982885	44	deleterious	-0.941	-3.296	106.767	0.320002	0.689863	12.6011	0.0474327	1.00217	DNA-PKCS_A121S
DNA-PKCS	3	missense	A121T	DNA-PKCS	121	121	A	T	Saturation-Mutagenesis	0.104	2.93251	-1.86	Neutral	0.982885	15	deleterious	-0.941	-3.998	106.767	0.320002	0.689863	12.6011	0.0474327	1.00217	DNA-PKCS_A121T
DNA-PKCS	3	missense	A121V	DNA-PKCS	121	121	A	V	Saturation-Mutagenesis	-0.096	2.93251	-2.127	Neutral	0.982885	57	deleterious	-0.941	-2.729	106.767	0.320002	0.689863	12.6011	0.0474327	1.00217	DNA-PKCS_A121V
DNA-PKCS	3	missense	A121W	DNA-PKCS	121	121	A	W	Saturation-Mutagenesis	-0.24	2.93251	-3.706	Deleterious	1.02734	-61	neutral	-1.76	-1.664	106.767	0.320002	0.689863	12.6011	0.0474327	1.00217	DNA-PKCS_A121W
DNA-PKCS	3	missense	A121Y	DNA-PKCS	121	121	A	Y	Saturation-Mutagenesis	0.975	2.93251	-2.957	Deleterious	0.982885	-39	deleterious	-1.545	-3.466	106.767	0.320002	0.689863	12.6011	0.0474327	1.00217	DNA-PKCS_A121Y
DNA-PKCS	3	missense	A1237C	DNA-PKCS	1237	1237	A	C	Saturation-Mutagenesis	-0.638	92.6813	-2.179	Neutral	0.869584	-58	deleterious	-0.89	-2.794	61.9793	0.465591	1.00412	12.8127	0.0529891	1.65413	DNA-PKCS_A1237C
DNA-PKCS	3	missense	A1237D	DNA-PKCS	1237	1237	A	D	Saturation-Mutagenesis	-0.434	92.6813	-1.972	Neutral	0.869584	56	deleterious	-0.89	-4.033	61.9793	0.465591	1.00412	12.8127	0.0529891	1.65413	DNA-PKCS_A1237D
DNA-PKCS	3	missense	A1237E	DNA-PKCS	1237	1237	A	E	Saturation-Mutagenesis	-0.359	92.6813	-1.492	Neutral	0.869584	35	deleterious	-0.89	-4.546	61.9793	0.465591	1.00412	12.8127	0.0529891	1.65413	DNA-PKCS_A1237E
DNA-PKCS	3	missense	A1237F	DNA-PKCS	1237	1237	A	F	Saturation-Mutagenesis	-0.604	92.6813	-3.034	Deleterious	0.869584	-68	deleterious	-1.272	-3.612	61.9793	0.572107	1.31604	15.0519	0.0626852	2.0286	DNA-PKCS_A1237F
DNA-PKCS	3	missense	A1237G	DNA-PKCS	1237	1237	A	G	Saturation-Mutagenesis	-0.638	92.6813	-1.554	Neutral	0.869584	-16	deleterious	-0.89	-3.714	61.9793	0.572107	1.31604	15.0519	0.0626852	2.0286	DNA-PKCS_A1237G
DNA-PKCS	3	missense	A1237H	DNA-PKCS	1237	1237	A	H	Saturation-Mutagenesis	-0.193	92.6813	-2.107	Neutral	0.869584	-25	deleterious	-0.89	-3.33	61.9793	0.465591	1.00412	12.8127	0.0529891	1.65413	DNA-PKCS_A1237H
DNA-PKCS	3	missense	A1237I	DNA-PKCS	1237	1237	A	I	Saturation-Mutagenesis	-0.286	92.6813	-2.476	Neutral	0.869584	-46	deleterious	-1.272	-2.528	61.9793	0.572107	1.31604	15.0519	0.0626852	2.0286	DNA-PKCS_A1237I
DNA-PKCS	3	missense	A1237K	DNA-PKCS	1237	1237	A	K	Saturation-Mutagenesis	-0.255	92.6813	-1.159	Neutral	0.869584	66	deleterious	-0.89	-4.032	61.9793	0.465591	1.00412	12.8127	0.0529891	1.65413	DNA-PKCS_A1237K
DNA-PKCS	3	missense	A1237L	DNA-PKCS	1237	1237	A	L	Saturation-Mutagenesis	-0.374	92.6813	-2.416	Neutral	0.869584	-36	deleterious	-1.272	-4.564	61.9793	0.572107	1.31604	15.0519	0.0626852	2.0286	DNA-PKCS_A1237L
DNA-PKCS	3	missense	A1237M	DNA-PKCS	1237	1237	A	M	Saturation-Mutagenesis	-0.455	92.6813	-2.083	Neutral	0.869584	-40	deleterious	-1.272	-3.289	61.9793	0.572107	1.31604	15.0519	0.0626852	2.0286	DNA-PKCS_A1237M
DNA-PKCS	3	missense	A1237N	DNA-PKCS	1237	1237	A	N	Saturation-Mutagenesis	-0.61	92.6813	-1.337	Neutral	0.869584	-38	deleterious	-0.89	-2.987	61.9793	0.465591	1.00412	12.8127	0.0529891	1.65413	DNA-PKCS_A1237N
DNA-PKCS	3	missense	A1237P	DNA-PKCS	1237	1237	A	P	Saturation-Mutagenesis	-0.184	92.6813	-2.059	Neutral	0.869584	-36	deleterious	-0.89	-3.526	61.9793	0.572107	1.31604	15.0519	0.0626852	2.0286	DNA-PKCS_A1237P
DNA-PKCS	3	missense	A1237Q	DNA-PKCS	1237	1237	A	Q	Saturation-Mutagenesis	-0.61	92.6813	-1.492	Neutral	0.869584	-47	deleterious	-0.89	-2.763	61.9793	0.465591	1.00412	12.8127	0.0529891	1.65413	DNA-PKCS_A1237Q
DNA-PKCS	3	missense	A1237R	DNA-PKCS	1237	1237	A	R	Saturation-Mutagenesis	-0.339	92.6813	-1.662	Neutral	0.869584	-2	deleterious	-0.89	-3.52	61.9793	0.465591	1.00412	12.8127	0.0529891	1.65413	DNA-PKCS_A1237R
DNA-PKCS	3	missense	A1237S	DNA-PKCS	1237	1237	A	S	Saturation-Mutagenesis	-0.054	92.6813	-0.068	Neutral	0.869584	-20	deleterious	-0.89	-3.717	61.9793	0.465591	1.00412	12.8127	0.0529891	1.65413	DNA-PKCS_A1237S
DNA-PKCS	2	missense	A1237T	DNA-PKCS	1237	1237	A	T	Non-Pathogenic	-0.529	92.6813	-1.065	Neutral	0.869584	-39	deleterious	-0.89	-4.014	61.9793	0.465591	1.00412	12.8127	0.0529891	1.65413	DNA-PKCS_A1237T
DNA-PKCS	3	missense	A1237V	DNA-PKCS	1237	1237	A	V	Saturation-Mutagenesis	-0.301	92.6813	-2.028	Neutral	0.869584	-40	deleterious	-0.89	-3.847	61.9793	0.572107	1.31604	15.0519	0.0626852	2.0286	DNA-PKCS_A1237V
DNA-PKCS	3	missense	A1237W	DNA-PKCS	1237	1237	A	W	Saturation-Mutagenesis	-0.061	92.6813	-3.751	Deleterious	0.869584	-35	deleterious	-1.272	-2.294	61.9793	0.572107	1.31604	15.0519	0.0626852	2.0286	DNA-PKCS_A1237W
DNA-PKCS	3	missense	A1237Y	DNA-PKCS	1237	1237	A	Y	Saturation-Mutagenesis	-0.527	92.6813	-2.834	Deleterious	0.869584	-66	deleterious	-1.272	-3.367	61.9793	0.572107	1.31604	15.0519	0.0626852	2.0286	DNA-PKCS_A1237Y
DNA-PKCS	3	missense	A1252C	DNA-PKCS	1252	1252	A	C	Saturation-Mutagenesis	-1.372	83.8705	-1.962	Neutral	0.830247	10	deleterious	-1.372	-3.95	57.4882	0.437184	1.14732	12.0716	0.035049	1.85431	DNA-PKCS_A1252C
DNA-PKCS	3	missense	A1252D	DNA-PKCS	1252	1252	A	D	Saturation-Mutagenesis	-1.588	83.8705	-1.889	Neutral	0.830247	-6	deleterious	-1.372	-3.715	57.4882	0.437184	1.14732	12.0716	0.035049	1.85431	DNA-PKCS_A1252D
DNA-PKCS	3	missense	A1252E	DNA-PKCS	1252	1252	A	E	Saturation-Mutagenesis	-1.688	83.8705	-1.326	Neutral	0.830247	-15	deleterious	-1.372	-3.316	57.4882	0.437184	1.14732	12.0716	0.035049	1.85431	DNA-PKCS_A1252E
DNA-PKCS	3	missense	A1252F	DNA-PKCS	1252	1252	A	F	Saturation-Mutagenesis	0.656	83.8705	-2.093	Neutral	0.830247	-65	deleterious	-1.372	-4.059	57.4882	0.437184	1.14732	12.0716	0.035049	1.85431	DNA-PKCS_A1252F
DNA-PKCS	3	missense	A1252G	DNA-PKCS	1252	1252	A	G	Saturation-Mutagenesis	-1.372	83.8705	-1.354	Neutral	0.830247	56	deleterious	-1.372	-2.863	57.4882	0.437184	1.14732	12.0716	0.035049	1.85431	DNA-PKCS_A1252G
DNA-PKCS	3	missense	A1252H	DNA-PKCS	1252	1252	A	H	Saturation-Mutagenesis	-1.152	83.8705	-2.388	Neutral	0.830247	-35	deleterious	-1.372	-2.407	57.4882	0.437184	1.14732	12.0716	0.035049	1.85431	DNA-PKCS_A1252H
DNA-PKCS	3	missense	A1252I	DNA-PKCS	1252	1252	A	I	Saturation-Mutagenesis	-1.342	83.8705	-1.51	Neutral	0.830247	-38	deleterious	-1.372	-2.203	57.4882	0.437184	1.14732	12.0716	0.035049	1.85431	DNA-PKCS_A1252I
DNA-PKCS	3	missense	A1252K	DNA-PKCS	1252	1252	A	K	Saturation-Mutagenesis	-1.383	83.8705	-1.826	Neutral	0.830247	-13	deleterious	-1.372	-3.796	57.4882	0.437184	1.14732	12.0716	0.035049	1.85431	DNA-PKCS_A1252K
DNA-PKCS	3	missense	A1252L	DNA-PKCS	1252	1252	A	L	Saturation-Mutagenesis	-1.605	83.8705	-1.758	Neutral	0.830247	-32	deleterious	-1.372	-4.265	57.4882	0.437184	1.14732	12.0716	0.035049	1.85431	DNA-PKCS_A1252L
DNA-PKCS	3	missense	A1252M	DNA-PKCS	1252	1252	A	M	Saturation-Mutagenesis	-0.727	83.8705	-1.706	Neutral	0.830247	-32	deleterious	-1.372	-3.944	57.4882	0.437184	1.14732	12.0716	0.035049	1.85431	DNA-PKCS_A1252M
DNA-PKCS	3	missense	A1252N	DNA-PKCS	1252	1252	A	N	Saturation-Mutagenesis	-1.179	83.8705	-1.757	Neutral	0.830247	-2	deleterious	-1.372	-4.029	57.4882	0.437184	1.14732	12.0716	0.035049	1.85431	DNA-PKCS_A1252N
DNA-PKCS	3	missense	A1252P	DNA-PKCS	1252	1252	A	P	Saturation-Mutagenesis	-1.364	83.8705	-1.859	Neutral	0.830247	-26	deleterious	-1.372	-3.181	57.4882	0.437184	1.14732	12.0716	0.035049	1.85431	DNA-PKCS_A1252P
DNA-PKCS	3	missense	A1252Q	DNA-PKCS	1252	1252	A	Q	Saturation-Mutagenesis	-1.179	83.8705	-1.726	Neutral	0.830247	14	deleterious	-1.372	-3.513	57.4882	0.437184	1.14732	12.0716	0.035049	1.85431	DNA-PKCS_A1252Q
DNA-PKCS	3	missense	A1252R	DNA-PKCS	1252	1252	A	R	Saturation-Mutagenesis	-1.818	83.8705	-2.05	Neutral	0.830247	-3	deleterious	-1.372	-4.75	57.4882	0.437184	1.14732	12.0716	0.035049	1.85431	DNA-PKCS_A1252R
DNA-PKCS	3	missense	A1252S	DNA-PKCS	1252	1252	A	S	Saturation-Mutagenesis	-1.534	83.8705	-0.81	Neutral	0.830247	-5	deleterious	-1.372	-3.36	57.4882	0.437184	1.14732	12.0716	0.035049	1.85431	DNA-PKCS_A1252S
DNA-PKCS	2	missense	A1252T	DNA-PKCS	1252	1252	A	T	Non-Pathogenic	-0.647	83.8705	-1.004	Neutral	0.830247	4	deleterious	-1.372	-3.908	57.4882	0.437184	1.14732	12.0716	0.035049	1.85431	DNA-PKCS_A1252T
DNA-PKCS	3	missense	A1252V	DNA-PKCS	1252	1252	A	V	Saturation-Mutagenesis	-1.29	83.8705	-1.028	Neutral	0.830247	-33	deleterious	-1.372	-3.4	57.4882	0.437184	1.14732	12.0716	0.035049	1.85431	DNA-PKCS_A1252V
DNA-PKCS	3	missense	A1252W	DNA-PKCS	1252	1252	A	W	Saturation-Mutagenesis	-0.03	83.8705	-3.114	Deleterious	0.830247	-28	deleterious	-1.943	-3.851	57.4882	0.437184	1.14732	12.0716	0.035049	1.85431	DNA-PKCS_A1252W
DNA-PKCS	3	missense	A1252Y	DNA-PKCS	1252	1252	A	Y	Saturation-Mutagenesis	-0.586	83.8705	-2.326	Neutral	0.830247	-63	deleterious	-1.943	-5.144	57.4882	0.437184	1.14732	12.0716	0.035049	1.85431	DNA-PKCS_A1252Y
DNA-PKCS	3	missense	A1262C	DNA-PKCS	1262	1262	A	C	Saturation-Mutagenesis	-1.413	84.9299	-3.027	Deleterious	0.848214	-6	deleterious	-1.332	-3.943	44.2334	0.503431	1.12144	13.0125	0.051173	1.98011	DNA-PKCS_A1262C
DNA-PKCS	3	missense	A1262D	DNA-PKCS	1262	1262	A	D	Saturation-Mutagenesis	-1.692	84.9299	-4.424	Deleterious	0.848214	-13	deleterious	-1.257	-2.456	44.2334	0.503431	1.12144	13.0125	0.051173	1.98011	DNA-PKCS_A1262D
DNA-PKCS	3	missense	A1262E	DNA-PKCS	1262	1262	A	E	Saturation-Mutagenesis	-1.834	84.9299	-3.709	Deleterious	0.848214	-26	deleterious	-1.257	-2.511	44.2334	0.503431	1.12144	13.0125	0.051173	1.98011	DNA-PKCS_A1262E
DNA-PKCS	3	missense	A1262F	DNA-PKCS	1262	1262	A	F	Saturation-Mutagenesis	-0.89	84.9299	-4.59	Deleterious	0.848214	-36	deleterious	-1.332	-2.455	44.2334	0.453645	1.13409	12.9121	0.0446542	1.91424	DNA-PKCS_A1262F
DNA-PKCS	3	missense	A1262G	DNA-PKCS	1262	1262	A	G	Saturation-Mutagenesis	-1.413	84.9299	-3.094	Deleterious	0.848214	42	deleterious	-1.332	-4.619	44.2334	0.453645	1.13409	12.9121	0.0446542	1.91424	DNA-PKCS_A1262G
DNA-PKCS	3	missense	A1262H	DNA-PKCS	1262	1262	A	H	Saturation-Mutagenesis	-1.3	84.9299	-4.557	Deleterious	0.848214	-8	deleterious	-1.257	-3.894	44.2334	0.503431	1.12144	13.0125	0.051173	1.98011	DNA-PKCS_A1262H
DNA-PKCS	3	missense	A1262I	DNA-PKCS	1262	1262	A	I	Saturation-Mutagenesis	-1.185	84.9299	-3.775	Deleterious	0.848214	-13	deleterious	-1.332	-3.638	44.2334	0.453645	1.13409	12.9121	0.0446542	1.91424	DNA-PKCS_A1262I
DNA-PKCS	3	missense	A1262K	DNA-PKCS	1262	1262	A	K	Saturation-Mutagenesis	-1.516	84.9299	-3.709	Deleterious	0.848214	-15	deleterious	-1.257	-2.979	44.2334	0.503431	1.12144	13.0125	0.051173	1.98011	DNA-PKCS_A1262K
DNA-PKCS	3	missense	A1262L	DNA-PKCS	1262	1262	A	L	Saturation-Mutagenesis	-1.431	84.9299	-3.775	Deleterious	0.848214	17	deleterious	-1.332	-3.396	44.2334	0.453645	1.13409	12.9121	0.0446542	1.91424	DNA-PKCS_A1262L
DNA-PKCS	3	missense	A1262M	DNA-PKCS	1262	1262	A	M	Saturation-Mutagenesis	-2.421	84.9299	-3.742	Deleterious	0.848214	-18	deleterious	-1.332	-3.277	44.2334	0.453645	1.13409	12.9121	0.0446542	1.91424	DNA-PKCS_A1262M
DNA-PKCS	3	missense	A1262N	DNA-PKCS	1262	1262	A	N	Saturation-Mutagenesis	-1.242	84.9299	-4.29	Deleterious	0.848214	-4	deleterious	-1.257	-3.881	44.2334	0.503431	1.12144	13.0125	0.051173	1.98011	DNA-PKCS_A1262N
DNA-PKCS	3	missense	A1262P	DNA-PKCS	1262	1262	A	P	Saturation-Mutagenesis	-1.506	84.9299	-3.742	Deleterious	0.848214	-10	deleterious	-1.332	-3.655	44.2334	0.453645	1.13409	12.9121	0.0446542	1.91424	DNA-PKCS_A1262P
DNA-PKCS	3	missense	A1262Q	DNA-PKCS	1262	1262	A	Q	Saturation-Mutagenesis	-1.242	84.9299	-3.709	Deleterious	0.848214	0	deleterious	-1.332	-5.296	44.2334	0.503431	1.12144	13.0125	0.051173	1.98011	DNA-PKCS_A1262Q
DNA-PKCS	3	missense	A1262R	DNA-PKCS	1262	1262	A	R	Saturation-Mutagenesis	-2.161	84.9299	-3.742	Deleterious	0.848214	-10	deleterious	-1.257	-3.597	44.2334	0.503431	1.12144	13.0125	0.051173	1.98011	DNA-PKCS_A1262R
DNA-PKCS	3	missense	A1262S	DNA-PKCS	1262	1262	A	S	Saturation-Mutagenesis	-1.804	84.9299	-1.945	Neutral	0.848214	-16	deleterious	-1.257	-4.039	44.2334	0.503431	1.12144	13.0125	0.051173	1.98011	DNA-PKCS_A1262S
DNA-PKCS	3	missense	A1262T	DNA-PKCS	1262	1262	A	T	Saturation-Mutagenesis	-0.776	84.9299	-2.36	Neutral	0.848214	-5	deleterious	-1.257	-3.626	44.2334	0.503431	1.12144	13.0125	0.051173	1.98011	DNA-PKCS_A1262T
DNA-PKCS	1	missense	A1262V	DNA-PKCS	1262	1262	A	V	Pathogenic	-1.158	84.9299	-2.96	Deleterious	0.848214	-33	deleterious	-1.332	-3.633	44.2334	0.453645	1.13409	12.9121	0.0446542	1.91424	DNA-PKCS_A1262V
DNA-PKCS	3	missense	A1262W	DNA-PKCS	1262	1262	A	W	Saturation-Mutagenesis	-1.798	84.9299	-5.339	Deleterious	0.881274	-13	deleterious	-1.332	-4.64	44.2334	0.453645	1.13409	12.9121	0.0446542	1.91424	DNA-PKCS_A1262W
DNA-PKCS	3	missense	A1262Y	DNA-PKCS	1262	1262	A	Y	Saturation-Mutagenesis	-2.294	84.9299	-4.59	Deleterious	0.848214	-47	deleterious	-1.332	-4.098	44.2334	0.453645	1.13409	12.9121	0.0446542	1.91424	DNA-PKCS_A1262Y
DNA-PKCS	3	missense	A1263C	DNA-PKCS	1263	1263	A	C	Saturation-Mutagenesis	-1.365	81.4201	-2.757	Deleterious	0.881274	-33	deleterious	-1.934	-4.366	46.2045	0.453645	1.13409	12.9121	0.0446542	1.91424	DNA-PKCS_A1263C
DNA-PKCS	3	missense	A1263D	DNA-PKCS	1263	1263	A	D	Saturation-Mutagenesis	-1.674	81.4201	-3.683	Deleterious	0.881274	-3	deleterious	-1.332	-1.987	46.2045	0.453645	1.13409	12.9121	0.0446542	1.91424	DNA-PKCS_A1263D
DNA-PKCS	3	missense	A1263E	DNA-PKCS	1263	1263	A	E	Saturation-Mutagenesis	-1.817	81.4201	-3.102	Deleterious	0.881274	-3	deleterious	-1.332	-2.561	46.2045	0.453645	1.13409	12.9121	0.0446542	1.91424	DNA-PKCS_A1263E
DNA-PKCS	3	missense	A1263F	DNA-PKCS	1263	1263	A	F	Saturation-Mutagenesis	0.238	81.4201	-4.163	Deleterious	0.881274	-4	deleterious	-1.934	-5.086	46.2045	0.453645	1.13409	12.9121	0.0446542	1.91424	DNA-PKCS_A1263F
DNA-PKCS	3	missense	A1263G	DNA-PKCS	1263	1263	A	G	Saturation-Mutagenesis	-1.365	81.4201	-2.644	Deleterious	0.881274	12	neutral	-1.934	-1.816	46.2045	0.453645	1.13409	12.9121	0.0446542	1.91424	DNA-PKCS_A1263G
DNA-PKCS	3	missense	A1263H	DNA-PKCS	1263	1263	A	H	Saturation-Mutagenesis	-1.286	81.4201	-3.951	Deleterious	0.881274	-42	deleterious	-1.332	-3.96	46.2045	0.453645	1.13409	12.9121	0.0446542	1.91424	DNA-PKCS_A1263H
DNA-PKCS	3	missense	A1263I	DNA-PKCS	1263	1263	A	I	Saturation-Mutagenesis	-1.279	81.4201	-3.45	Deleterious	0.881274	-4	deleterious	-1.934	-3.41	46.2045	0.453645	1.13409	12.9121	0.0446542	1.91424	DNA-PKCS_A1263I
DNA-PKCS	3	missense	A1263K	DNA-PKCS	1263	1263	A	K	Saturation-Mutagenesis	-1.517	81.4201	-3.102	Deleterious	0.881274	21	deleterious	-1.332	-3.008	46.2045	0.453645	1.13409	12.9121	0.0446542	1.91424	DNA-PKCS_A1263K
DNA-PKCS	3	missense	A1263L	DNA-PKCS	1263	1263	A	L	Saturation-Mutagenesis	-1.565	81.4201	-3.472	Deleterious	0.881274	35	neutral	-1.934	-2.515	46.2045	0.453645	1.13409	12.9121	0.0446542	1.91424	DNA-PKCS_A1263L
DNA-PKCS	3	missense	A1263M	DNA-PKCS	1263	1263	A	M	Saturation-Mutagenesis	-0.887	81.4201	-3.271	Deleterious	0.881274	-10	neutral	-1.934	-2.594	46.2045	0.453645	1.13409	12.9121	0.0446542	1.91424	DNA-PKCS_A1263M
DNA-PKCS	3	missense	A1263N	DNA-PKCS	1263	1263	A	N	Saturation-Mutagenesis	-1.18	81.4201	-3.481	Deleterious	0.881274	-84	deleterious	-1.332	-3.912	46.2045	0.453645	1.13409	12.9121	0.0446542	1.91424	DNA-PKCS_A1263N
DNA-PKCS	3	missense	A1263P	DNA-PKCS	1263	1263	A	P	Saturation-Mutagenesis	-1.488	81.4201	-3.004	Deleterious	0.881274	4	neutral	-1.934	-2.376	46.2045	0.453645	1.13409	12.9121	0.0446542	1.91424	DNA-PKCS_A1263P
DNA-PKCS	3	missense	A1263Q	DNA-PKCS	1263	1263	A	Q	Saturation-Mutagenesis	-1.18	81.4201	-3.102	Deleterious	0.881274	-54	deleterious	-1.934	-3.409	46.2045	0.453645	1.13409	12.9121	0.0446542	1.91424	DNA-PKCS_A1263Q
DNA-PKCS	3	missense	A1263R	DNA-PKCS	1263	1263	A	R	Saturation-Mutagenesis	-2.002	81.4201	-3.315	Deleterious	0.881274	-39	deleterious	-1.332	-3.488	46.2045	0.453645	1.13409	12.9121	0.0446542	1.91424	DNA-PKCS_A1263R
DNA-PKCS	3	missense	A1263S	DNA-PKCS	1263	1263	A	S	Saturation-Mutagenesis	-1.816	81.4201	-1.158	Neutral	0.881274	-88	deleterious	-1.332	-4.057	46.2045	0.453645	1.13409	12.9121	0.0446542	1.91424	DNA-PKCS_A1263S
DNA-PKCS	2	missense	A1263T	DNA-PKCS	1263	1263	A	T	Non-Pathogenic	-0.672	81.4201	-1.943	Neutral	0.881274	-90	deleterious	-1.332	-3.683	46.2045	0.453645	1.13409	12.9121	0.0446542	1.91424	DNA-PKCS_A1263T
DNA-PKCS	2	missense	A1263V	DNA-PKCS	1263	1263	A	V	Non-Pathogenic	-1.238	81.4201	-2.77	Deleterious	0.881274	-28	deleterious	-1.934	-3.192	46.2045	0.453645	1.13409	12.9121	0.0446542	1.91424	DNA-PKCS_A1263V
DNA-PKCS	3	missense	A1263W	DNA-PKCS	1263	1263	A	W	Saturation-Mutagenesis	-0.343	81.4201	-4.923	Deleterious	0.881274	3	deleterious	-1.934	-3.742	46.2045	0.453645	1.13409	12.9121	0.0446542	1.91424	DNA-PKCS_A1263W
DNA-PKCS	3	missense	A1263Y	DNA-PKCS	1263	1263	A	Y	Saturation-Mutagenesis	-0.567	81.4201	-4.13	Deleterious	0.881274	-39	deleterious	-1.934	-3.324	46.2045	0.453645	1.13409	12.9121	0.0446542	1.91424	DNA-PKCS_A1263Y
DNA-PKCS	3	missense	A1278C	DNA-PKCS	1278	1278	A	C	Saturation-Mutagenesis	-0.927	92.9069	-2.022	Neutral	0.86909	-53	neutral	-1.835	-2.112	56.4584	0.610985	1.18496	16.4834	0.0532957	2.43782	DNA-PKCS_A1278C
DNA-PKCS	3	missense	A1278D	DNA-PKCS	1278	1278	A	D	Saturation-Mutagenesis	-0.848	92.9069	-1.68	Neutral	0.86909	-19	deleterious	-1.835	-3.794	56.4584	0.610985	1.18496	16.4834	0.0532957	2.43782	DNA-PKCS_A1278D
DNA-PKCS	3	missense	A1278E	DNA-PKCS	1278	1278	A	E	Saturation-Mutagenesis	-0.932	92.9069	-1.436	Neutral	0.86909	-17	deleterious	-1.835	-3.849	56.4584	0.610985	1.18496	16.4834	0.0532957	2.43782	DNA-PKCS_A1278E
DNA-PKCS	3	missense	A1278F	DNA-PKCS	1278	1278	A	F	Saturation-Mutagenesis	0.12	92.9069	-2.587	Deleterious	0.86909	-38	deleterious	-1.701	-3.406	56.4584	0.592475	1.14152	15.8828	0.0547707	2.45197	DNA-PKCS_A1278F
DNA-PKCS	3	missense	A1278G	DNA-PKCS	1278	1278	A	G	Saturation-Mutagenesis	-0.927	92.9069	-1.432	Neutral	0.86909	-47	deleterious	-1.835	-3.037	56.4584	0.592475	1.14152	15.8828	0.0547707	2.45197	DNA-PKCS_A1278G
DNA-PKCS	3	missense	A1278H	DNA-PKCS	1278	1278	A	H	Saturation-Mutagenesis	-0.378	92.9069	-1.931	Neutral	0.86909	-78	deleterious	-1.835	-3.379	56.4584	0.610985	1.18496	16.4834	0.0532957	2.43782	DNA-PKCS_A1278H
DNA-PKCS	3	missense	A1278I	DNA-PKCS	1278	1278	A	I	Saturation-Mutagenesis	-0.812	92.9069	-1.867	Neutral	0.86909	-46	deleterious	-1.835	-4.151	56.4584	0.592475	1.14152	15.8828	0.0547707	2.45197	DNA-PKCS_A1278I
DNA-PKCS	3	missense	A1278K	DNA-PKCS	1278	1278	A	K	Saturation-Mutagenesis	-0.588	92.9069	-1.391	Neutral	0.86909	-76	neutral	-1.835	-2.48	56.4584	0.610985	1.18496	16.4834	0.0532957	2.43782	DNA-PKCS_A1278K
DNA-PKCS	3	missense	A1278L	DNA-PKCS	1278	1278	A	L	Saturation-Mutagenesis	-1.049	92.9069	-1.872	Neutral	0.86909	-30	deleterious	-1.701	-4.359	56.4584	0.592475	1.14152	15.8828	0.0547707	2.45197	DNA-PKCS_A1278L
DNA-PKCS	3	missense	A1278M	DNA-PKCS	1278	1278	A	M	Saturation-Mutagenesis	-1.004	92.9069	-1.534	Neutral	0.86909	-62	neutral	-1.701	-2.317	56.4584	0.592475	1.14152	15.8828	0.0547707	2.45197	DNA-PKCS_A1278M
DNA-PKCS	3	missense	A1278N	DNA-PKCS	1278	1278	A	N	Saturation-Mutagenesis	-0.764	92.9069	-1.817	Neutral	0.86909	-51	deleterious	-1.835	-3.038	56.4584	0.610985	1.18496	16.4834	0.0532957	2.43782	DNA-PKCS_A1278N
DNA-PKCS	3	missense	A1278P	DNA-PKCS	1278	1278	A	P	Saturation-Mutagenesis	-0.898	92.9069	2.109	Neutral	0.86909	-77	deleterious	-1.835	-4.387	56.4584	0.592475	1.14152	15.8828	0.0547707	2.45197	DNA-PKCS_A1278P
DNA-PKCS	3	missense	A1278Q	DNA-PKCS	1278	1278	A	Q	Saturation-Mutagenesis	-0.764	92.9069	-1.358	Neutral	0.86909	-64	neutral	-1.835	-2.366	56.4584	0.610985	1.18496	16.4834	0.0532957	2.43782	DNA-PKCS_A1278Q
DNA-PKCS	3	missense	A1278R	DNA-PKCS	1278	1278	A	R	Saturation-Mutagenesis	-1.005	92.9069	-1.825	Neutral	0.86909	-58	neutral	-1.835	-2.531	56.4584	0.610985	1.18496	16.4834	0.0532957	2.43782	DNA-PKCS_A1278R
DNA-PKCS	3	missense	A1278S	DNA-PKCS	1278	1278	A	S	Saturation-Mutagenesis	-0.817	92.9069	-0.787	Neutral	0.86909	43	deleterious	-1.835	-4.887	56.4584	0.610985	1.18496	16.4834	0.0532957	2.43782	DNA-PKCS_A1278S
DNA-PKCS	2	missense	A1278T	DNA-PKCS	1278	1278	A	T	Non-Pathogenic	-0.31	92.9069	-0.892	Neutral	0.86909	-57	deleterious	-1.835	-3.492	56.4584	0.610985	1.18496	16.4834	0.0532957	2.43782	DNA-PKCS_A1278T
DNA-PKCS	2	missense	A1278V	DNA-PKCS	1278	1278	A	V	Non-Pathogenic	-0.792	92.9069	-1.278	Neutral	0.86909	-75	deleterious	-1.835	-4.076	56.4584	0.592475	1.14152	15.8828	0.0547707	2.45197	DNA-PKCS_A1278V
DNA-PKCS	3	missense	A1278W	DNA-PKCS	1278	1278	A	W	Saturation-Mutagenesis	-0.444	92.9069	-3.125	Deleterious	0.86909	-29	deleterious	-1.701	-3.276	56.4584	0.592475	1.14152	15.8828	0.0547707	2.45197	DNA-PKCS_A1278W
DNA-PKCS	3	missense	A1278Y	DNA-PKCS	1278	1278	A	Y	Saturation-Mutagenesis	-0.839	92.9069	-2.144	Neutral	0.86909	-56	neutral	-1.701	-2.381	56.4584	0.592475	1.14152	15.8828	0.0547707	2.45197	DNA-PKCS_A1278Y
DNA-PKCS	3	missense	A127C	DNA-PKCS	127	127	A	C	Saturation-Mutagenesis	-0.508	8.01947	-1.794	Neutral	1.02734	41	deleterious	-1.188	-3.811	98.0931	0.406154	0.903124	15.2326	0.0554482	1.18204	DNA-PKCS_A127C
DNA-PKCS	3	missense	A127D	DNA-PKCS	127	127	A	D	Saturation-Mutagenesis	-1.532	8.01947	-2.44	Neutral	1.02734	15	deleterious	-2.346	-4.254	98.0931	0.406154	0.903124	15.2326	0.0554482	1.18204	DNA-PKCS_A127D
DNA-PKCS	3	missense	A127E	DNA-PKCS	127	127	A	E	Saturation-Mutagenesis	-0.719	8.01947	-1.975	Neutral	1.02734	-19	neutral	-2.346	-4.032	98.0931	0.406154	0.903124	15.2326	0.0554482	1.18204	DNA-PKCS_A127E
DNA-PKCS	3	missense	A127F	DNA-PKCS	127	127	A	F	Saturation-Mutagenesis	-0.508	8.01947	-2.64	Deleterious	1.02734	-36	deleterious	-1.188	-3.975	98.0931	0.406154	0.903124	15.2326	0.0554482	1.18204	DNA-PKCS_A127F
DNA-PKCS	3	missense	A127G	DNA-PKCS	127	127	A	G	Saturation-Mutagenesis	-0.853	8.01947	-1.91	Neutral	1.02734	37	deleterious	-1.188	-3.421	98.0931	0.406154	0.903124	15.2326	0.0554482	1.18204	DNA-PKCS_A127G
DNA-PKCS	3	missense	A127H	DNA-PKCS	127	127	A	H	Saturation-Mutagenesis	-1.591	8.01947	-2.724	Deleterious	1.02734	-43	neutral	-2.346	-3.368	98.0931	0.406154	0.903124	15.2326	0.0554482	1.18204	DNA-PKCS_A127H
DNA-PKCS	3	missense	A127I	DNA-PKCS	127	127	A	I	Saturation-Mutagenesis	-0.982	8.01947	-1.842	Neutral	1.02734	78	deleterious	-1.188	-4.045	98.0931	0.406154	0.903124	15.2326	0.0554482	1.18204	DNA-PKCS_A127I
DNA-PKCS	3	missense	A127K	DNA-PKCS	127	127	A	K	Saturation-Mutagenesis	-1.354	8.01947	-2.042	Neutral	1.02734	-7	deleterious	-2.346	-4.392	98.0931	0.406154	0.903124	15.2326	0.0554482	1.18204	DNA-PKCS_A127K
DNA-PKCS	3	missense	A127L	DNA-PKCS	127	127	A	L	Saturation-Mutagenesis	-0.935	8.01947	-1.975	Neutral	1.02734	-27	neutral	-1.188	-2.397	98.0931	0.406154	0.903124	15.2326	0.0554482	1.18204	DNA-PKCS_A127L
DNA-PKCS	3	missense	A127M	DNA-PKCS	127	127	A	M	Saturation-Mutagenesis	-0.508	8.01947	-1.859	Neutral	1.02734	-27	deleterious	-1.188	-3.619	98.0931	0.406154	0.903124	15.2326	0.0554482	1.18204	DNA-PKCS_A127M
DNA-PKCS	3	missense	A127N	DNA-PKCS	127	127	A	N	Saturation-Mutagenesis	-1.205	8.01947	-2.29	Neutral	1.02734	22	deleterious	-1.188	-3.603	98.0931	0.406154	0.903124	15.2326	0.0554482	1.18204	DNA-PKCS_A127N
DNA-PKCS	3	missense	A127P	DNA-PKCS	127	127	A	P	Saturation-Mutagenesis	-0.853	8.01947	-2.092	Neutral	1.02734	47	deleterious	-1.188	-3.292	98.0931	0.406154	0.903124	15.2326	0.0554482	1.18204	DNA-PKCS_A127P
DNA-PKCS	3	missense	A127Q	DNA-PKCS	127	127	A	Q	Saturation-Mutagenesis	-1.121	8.01947	-1.875	Neutral	1.02734	15	deleterious	-1.188	-3.954	98.0931	0.406154	0.903124	15.2326	0.0554482	1.18204	DNA-PKCS_A127Q
DNA-PKCS	3	missense	A127R	DNA-PKCS	127	127	A	R	Saturation-Mutagenesis	-0.266	8.01947	-2.192	Neutral	1.02734	-50	neutral	-2.346	-3.972	98.0931	0.406154	0.903124	15.2326	0.0554482	1.18204	DNA-PKCS_A127R
DNA-PKCS	3	missense	A127S	DNA-PKCS	127	127	A	S	Saturation-Mutagenesis	-0.9	8.01947	-0.779	Neutral	1.02734	7	deleterious	-1.188	-3.854	98.0931	0.406154	0.903124	15.2326	0.0554482	1.18204	DNA-PKCS_A127S
DNA-PKCS	3	missense	A127T	DNA-PKCS	127	127	A	T	Saturation-Mutagenesis	-1.113	8.01947	-0.794	Neutral	1.02734	-14	deleterious	-1.188	-4.775	98.0931	0.406154	0.903124	15.2326	0.0554482	1.18204	DNA-PKCS_A127T
DNA-PKCS	3	missense	A127V	DNA-PKCS	127	127	A	V	Saturation-Mutagenesis	-0.982	8.01947	-1.41	Neutral	1.02734	30	deleterious	-1.188	-3.993	98.0931	0.406154	0.903124	15.2326	0.0554482	1.18204	DNA-PKCS_A127V
DNA-PKCS	3	missense	A127W	DNA-PKCS	127	127	A	W	Saturation-Mutagenesis	-0.727	8.01947	-3.256	Deleterious	1.02551	-22	deleterious	-1.188	-2.817	98.0931	0.406154	0.903124	15.2326	0.0554482	1.18204	DNA-PKCS_A127W
DNA-PKCS	3	missense	A127Y	DNA-PKCS	127	127	A	Y	Saturation-Mutagenesis	-0.669	8.01947	-2.74	Deleterious	1.02734	-20	deleterious	-1.188	-2.888	98.0931	0.406154	0.903124	15.2326	0.0554482	1.18204	DNA-PKCS_A127Y
DNA-PKCS	3	missense	A1286C	DNA-PKCS	1286	1286	A	C	Saturation-Mutagenesis	0.045	103.414	-1.265	Neutral	0.783451	-13	deleterious	-1.675	-3.574	63.5232	1.29941	2.754	32.1243	0.110323	5.14293	DNA-PKCS_A1286C
DNA-PKCS	3	missense	A1286D	DNA-PKCS	1286	1286	A	D	Saturation-Mutagenesis	0.199	103.414	-0.586	Neutral	0.783451	19	deleterious	-1.576	-3.372	63.5232	1.29941	2.754	32.1243	0.110323	5.14293	DNA-PKCS_A1286D
DNA-PKCS	3	missense	A1286E	DNA-PKCS	1286	1286	A	E	Saturation-Mutagenesis	0.363	103.414	0.171	Neutral	0.783451	4	deleterious	-1.576	-4.571	63.5232	1.29941	2.754	32.1243	0.110323	5.14293	DNA-PKCS_A1286E
DNA-PKCS	3	missense	A1286F	DNA-PKCS	1286	1286	A	F	Saturation-Mutagenesis	0.399	103.414	-1.362	Neutral	0.783451	-60	deleterious	-1.675	-4.68	63.5232	0.905463	1.67372	20.4558	0.0804898	3.50108	DNA-PKCS_A1286F
DNA-PKCS	3	missense	A1286G	DNA-PKCS	1286	1286	A	G	Saturation-Mutagenesis	0.045	103.414	-0.396	Neutral	0.783451	-28	deleterious	-1.675	-3.786	63.5232	0.905463	1.67372	20.4558	0.0804898	3.50108	DNA-PKCS_A1286G
DNA-PKCS	3	missense	A1286H	DNA-PKCS	1286	1286	A	H	Saturation-Mutagenesis	0.273	103.414	-0.885	Neutral	0.783451	-12	deleterious	-1.576	-3.435	63.5232	1.29941	2.754	32.1243	0.110323	5.14293	DNA-PKCS_A1286H
DNA-PKCS	3	missense	A1286I	DNA-PKCS	1286	1286	A	I	Saturation-Mutagenesis	0.902	103.414	-1.497	Neutral	0.783451	-47	deleterious	-1.675	-3.275	63.5232	0.905463	1.67372	20.4558	0.0804898	3.50108	DNA-PKCS_A1286I
DNA-PKCS	3	missense	A1286K	DNA-PKCS	1286	1286	A	K	Saturation-Mutagenesis	0.279	103.414	-0.145	Neutral	0.783451	-24	deleterious	-1.576	-3.819	63.5232	1.29941	2.754	32.1243	0.110323	5.14293	DNA-PKCS_A1286K
DNA-PKCS	3	missense	A1286L	DNA-PKCS	1286	1286	A	L	Saturation-Mutagenesis	0.976	103.414	-1.368	Neutral	0.783451	-42	deleterious	-1.675	-3.792	63.5232	0.905463	1.67372	20.4558	0.0804898	3.50108	DNA-PKCS_A1286L
DNA-PKCS	3	missense	A1286M	DNA-PKCS	1286	1286	A	M	Saturation-Mutagenesis	0.058	103.414	-0.998	Neutral	0.783451	-30	deleterious	-1.675	-3.979	63.5232	0.905463	1.67372	20.4558	0.0804898	3.50108	DNA-PKCS_A1286M
DNA-PKCS	3	missense	A1286N	DNA-PKCS	1286	1286	A	N	Saturation-Mutagenesis	-0.001	103.414	-0.521	Neutral	0.783451	-36	deleterious	-1.675	-3.902	63.5232	1.29941	2.754	32.1243	0.110323	5.14293	DNA-PKCS_A1286N
DNA-PKCS	3	missense	A1286P	DNA-PKCS	1286	1286	A	P	Saturation-Mutagenesis	0.48	103.414	-1.217	Neutral	0.783451	-74	deleterious	-1.675	-3.579	63.5232	0.905463	1.67372	20.4558	0.0804898	3.50108	DNA-PKCS_A1286P
DNA-PKCS	3	missense	A1286Q	DNA-PKCS	1286	1286	A	Q	Saturation-Mutagenesis	-0.001	103.414	-0.067	Neutral	0.783451	-27	neutral	-1.675	-2.792	63.5232	1.29941	2.754	32.1243	0.110323	5.14293	DNA-PKCS_A1286Q
DNA-PKCS	3	missense	A1286R	DNA-PKCS	1286	1286	A	R	Saturation-Mutagenesis	0.468	103.414	-0.703	Neutral	0.783451	-31	neutral	-1.576	-2.294	63.5232	1.29941	2.754	32.1243	0.110323	5.14293	DNA-PKCS_A1286R
DNA-PKCS	3	missense	A1286S	DNA-PKCS	1286	1286	A	S	Saturation-Mutagenesis	0.661	103.414	0.075	Neutral	0.783451	63	deleterious	-1.576	-4.18	63.5232	1.29941	2.754	32.1243	0.110323	5.14293	DNA-PKCS_A1286S
DNA-PKCS	3	missense	A1286T	DNA-PKCS	1286	1286	A	T	Saturation-Mutagenesis	-0.167	103.414	-0.162	Neutral	0.783451	-27	deleterious	-1.576	-4.212	63.5232	1.29941	2.754	32.1243	0.110323	5.14293	DNA-PKCS_A1286T
DNA-PKCS	3	missense	A1286V	DNA-PKCS	1286	1286	A	V	Saturation-Mutagenesis	0.876	103.414	-0.926	Neutral	0.783451	-71	neutral	-1.675	-2.514	63.5232	0.905463	1.67372	20.4558	0.0804898	3.50108	DNA-PKCS_A1286V
DNA-PKCS	3	missense	A1286W	DNA-PKCS	1286	1286	A	W	Saturation-Mutagenesis	0.381	103.414	-1.688	Neutral	0.823637	-28	deleterious	-1.675	-3.908	63.5232	0.905463	1.67372	20.4558	0.0804898	3.50108	DNA-PKCS_A1286W
DNA-PKCS	3	missense	A1286Y	DNA-PKCS	1286	1286	A	Y	Saturation-Mutagenesis	0.24	103.414	-0.873	Neutral	0.783451	-24	deleterious	-1.675	-3.488	63.5232	0.905463	1.67372	20.4558	0.0804898	3.50108	DNA-PKCS_A1286Y
DNA-PKCS	3	missense	A1293C	DNA-PKCS	1293	1293	A	C	Saturation-Mutagenesis	-0.882	97.1522	-2.379	Neutral	0.832729	49	deleterious	-2.477	-4.997	74.2133	0.410117	0.927931	13.1802	0.0468134	1.71999	DNA-PKCS_A1293C
DNA-PKCS	3	missense	A1293D	DNA-PKCS	1293	1293	A	D	Saturation-Mutagenesis	-0.958	97.1522	-2.538	Deleterious	0.832729	-13	neutral	-2.477	-2.764	74.2133	0.410117	0.927931	13.1802	0.0468134	1.71999	DNA-PKCS_A1293D
DNA-PKCS	3	missense	A1293E	DNA-PKCS	1293	1293	A	E	Saturation-Mutagenesis	-1.041	97.1522	-2.147	Neutral	0.832729	-5	neutral	-2.477	-2.688	74.2133	0.410117	0.927931	13.1802	0.0468134	1.71999	DNA-PKCS_A1293E
DNA-PKCS	3	missense	A1293F	DNA-PKCS	1293	1293	A	F	Saturation-Mutagenesis	-0.354	97.1522	-3.252	Deleterious	0.832729	51	neutral	-2.477	-2.834	74.2133	0.441297	0.991854	13.709	0.0513578	1.81523	DNA-PKCS_A1293F
DNA-PKCS	3	missense	A1293G	DNA-PKCS	1293	1293	A	G	Saturation-Mutagenesis	-0.882	97.1522	-1.922	Neutral	0.832729	13	neutral	-2.477	-3.505	74.2133	0.441297	0.991854	13.709	0.0513578	1.81523	DNA-PKCS_A1293G
DNA-PKCS	3	missense	A1293H	DNA-PKCS	1293	1293	A	H	Saturation-Mutagenesis	-0.553	97.1522	-2.862	Deleterious	0.832729	-72	neutral	-2.477	-2.855	74.2133	0.410117	0.927931	13.1802	0.0468134	1.71999	DNA-PKCS_A1293H
DNA-PKCS	3	missense	A1293I	DNA-PKCS	1293	1293	A	I	Saturation-Mutagenesis	-0.605	97.1522	-2.861	Deleterious	0.832729	24	neutral	-2.477	-2.707	74.2133	0.441297	0.991854	13.709	0.0513578	1.81523	DNA-PKCS_A1293I
DNA-PKCS	3	missense	A1293K	DNA-PKCS	1293	1293	A	K	Saturation-Mutagenesis	-0.731	97.1522	-2.18	Neutral	0.832729	-75	deleterious	-2.477	-4.527	74.2133	0.410117	0.927931	13.1802	0.0468134	1.71999	DNA-PKCS_A1293K
DNA-PKCS	3	missense	A1293L	DNA-PKCS	1293	1293	A	L	Saturation-Mutagenesis	-0.809	97.1522	-2.928	Deleterious	0.832729	-6	neutral	-2.477	-3.559	74.2133	0.441297	0.991854	13.709	0.0513578	1.81523	DNA-PKCS_A1293L
DNA-PKCS	3	missense	A1293M	DNA-PKCS	1293	1293	A	M	Saturation-Mutagenesis	-1.546	97.1522	-2.604	Deleterious	0.832729	-19	neutral	-2.477	-2.079	74.2133	0.441297	0.991854	13.709	0.0513578	1.81523	DNA-PKCS_A1293M
DNA-PKCS	3	missense	A1293N	DNA-PKCS	1293	1293	A	N	Saturation-Mutagenesis	-0.758	97.1522	-1.948	Neutral	0.832729	1	neutral	-2.477	-2.836	74.2133	0.410117	0.927931	13.1802	0.0468134	1.71999	DNA-PKCS_A1293N
DNA-PKCS	3	missense	A1293P	DNA-PKCS	1293	1293	A	P	Saturation-Mutagenesis	-0.883	97.1522	-2.404	Neutral	0.832729	2	neutral	-2.477	-3.954	74.2133	0.441297	0.991854	13.709	0.0513578	1.81523	DNA-PKCS_A1293P
DNA-PKCS	3	missense	A1293Q	DNA-PKCS	1293	1293	A	Q	Saturation-Mutagenesis	-0.758	97.1522	-2.047	Neutral	0.832729	9	neutral	-2.477	-2.649	74.2133	0.410117	0.927931	13.1802	0.0468134	1.71999	DNA-PKCS_A1293Q
DNA-PKCS	3	missense	A1293R	DNA-PKCS	1293	1293	A	R	Saturation-Mutagenesis	-1.248	97.1522	-2.504	Deleterious	0.832729	-54	deleterious	-1.281	-3.68	74.2133	0.410117	0.927931	13.1802	0.0468134	1.71999	DNA-PKCS_A1293R
DNA-PKCS	3	missense	A1293S	DNA-PKCS	1293	1293	A	S	Saturation-Mutagenesis	-1.016	97.1522	-0.069	Neutral	0.832729	50	neutral	-2.477	-2.728	74.2133	0.410117	0.927931	13.1802	0.0468134	1.71999	DNA-PKCS_A1293S
DNA-PKCS	3	missense	A1293T	DNA-PKCS	1293	1293	A	T	Saturation-Mutagenesis	-0.419	97.1522	-1.365	Neutral	0.832729	24	neutral	-2.477	-3.492	74.2133	0.410117	0.927931	13.1802	0.0468134	1.71999	DNA-PKCS_A1293T
DNA-PKCS	3	missense	A1293V	DNA-PKCS	1293	1293	A	V	Saturation-Mutagenesis	-0.595	97.1522	-2.47	Neutral	0.832729	-14	neutral	-2.477	-3.193	74.2133	0.441297	0.991854	13.709	0.0513578	1.81523	DNA-PKCS_A1293V
DNA-PKCS	3	missense	A1293W	DNA-PKCS	1293	1293	A	W	Saturation-Mutagenesis	-0.895	97.1522	-4.068	Deleterious	0.832729	16	neutral	-2.477	-2.981	74.2133	0.441297	0.991854	13.709	0.0513578	1.81523	DNA-PKCS_A1293W
DNA-PKCS	3	missense	A1293Y	DNA-PKCS	1293	1293	A	Y	Saturation-Mutagenesis	-1.461	97.1522	-3.286	Deleterious	0.832729	36	neutral	-2.477	-3.992	74.2133	0.441297	0.991854	13.709	0.0513578	1.81523	DNA-PKCS_A1293Y
DNA-PKCS	3	missense	A1295C	DNA-PKCS	1295	1295	A	C	Saturation-Mutagenesis	-1.349	93.2077	-1.972	Neutral	0.832729	27	deleterious	-1.228	-4.678	70.6299	0.443131	1.06946	13.9804	0.0515781	1.86278	DNA-PKCS_A1295C
DNA-PKCS	3	missense	A1295D	DNA-PKCS	1295	1295	A	D	Saturation-Mutagenesis	-1.636	93.2077	-1.03	Neutral	0.832729	41	deleterious	-1.228	-3.989	70.6299	0.443131	1.06946	13.9804	0.0515781	1.86278	DNA-PKCS_A1295D
DNA-PKCS	3	missense	A1295E	DNA-PKCS	1295	1295	A	E	Saturation-Mutagenesis	-1.736	93.2077	-0.659	Neutral	0.832729	27	deleterious	-1.228	-3.675	70.6299	0.443131	1.06946	13.9804	0.0515781	1.86278	DNA-PKCS_A1295E
DNA-PKCS	3	missense	A1295F	DNA-PKCS	1295	1295	A	F	Saturation-Mutagenesis	-0.254	93.2077	-1.731	Neutral	0.832729	38	deleterious	-1.228	-3.598	70.6299	0.38624	0.963533	12.3527	0.0449278	1.62621	DNA-PKCS_A1295F
DNA-PKCS	3	missense	A1295G	DNA-PKCS	1295	1295	A	G	Saturation-Mutagenesis	-1.349	93.2077	-1.234	Neutral	0.832729	24	deleterious	-1.228	-3.568	70.6299	0.38624	0.963533	12.3527	0.0449278	1.62621	DNA-PKCS_A1295G
DNA-PKCS	3	missense	A1295H	DNA-PKCS	1295	1295	A	H	Saturation-Mutagenesis	-1.285	93.2077	-0.528	Neutral	0.832729	36	deleterious	-1.228	-4.653	70.6299	0.443131	1.06946	13.9804	0.0515781	1.86278	DNA-PKCS_A1295H
DNA-PKCS	3	missense	A1295I	DNA-PKCS	1295	1295	A	I	Saturation-Mutagenesis	-1.137	93.2077	-1.776	Neutral	0.832729	-13	deleterious	-1.228	-3.021	70.6299	0.38624	0.963533	12.3527	0.0449278	1.62621	DNA-PKCS_A1295I
DNA-PKCS	3	missense	A1295K	DNA-PKCS	1295	1295	A	K	Saturation-Mutagenesis	-1.495	93.2077	-1.364	Neutral	0.832729	36	deleterious	-1.228	-3.424	70.6299	0.443131	1.06946	13.9804	0.0515781	1.86278	DNA-PKCS_A1295K
DNA-PKCS	3	missense	A1295L	DNA-PKCS	1295	1295	A	L	Saturation-Mutagenesis	-1.297	93.2077	-1.954	Neutral	0.832729	16	deleterious	-1.228	-3.089	70.6299	0.38624	0.963533	12.3527	0.0449278	1.62621	DNA-PKCS_A1295L
DNA-PKCS	3	missense	A1295M	DNA-PKCS	1295	1295	A	M	Saturation-Mutagenesis	-1.638	93.2077	-1.656	Neutral	0.832729	37	deleterious	-1.228	-3.929	70.6299	0.38624	0.963533	12.3527	0.0449278	1.62621	DNA-PKCS_A1295M
DNA-PKCS	3	missense	A1295N	DNA-PKCS	1295	1295	A	N	Saturation-Mutagenesis	-1.192	93.2077	-1.127	Neutral	0.832729	21	deleterious	-1.228	-3.938	70.6299	0.443131	1.06946	13.9804	0.0515781	1.86278	DNA-PKCS_A1295N
DNA-PKCS	3	missense	A1295P	DNA-PKCS	1295	1295	A	P	Saturation-Mutagenesis	-1.358	93.2077	-1.821	Neutral	0.832729	-18	deleterious	-1.228	-4.035	70.6299	0.38624	0.963533	12.3527	0.0449278	1.62621	DNA-PKCS_A1295P
DNA-PKCS	3	missense	A1295Q	DNA-PKCS	1295	1295	A	Q	Saturation-Mutagenesis	-1.192	93.2077	-0.87	Neutral	0.832729	25	deleterious	-1.228	-3.909	70.6299	0.443131	1.06946	13.9804	0.0515781	1.86278	DNA-PKCS_A1295Q
DNA-PKCS	3	missense	A1295R	DNA-PKCS	1295	1295	A	R	Saturation-Mutagenesis	-1.665	93.2077	-1.449	Neutral	0.832729	34	deleterious	-1.228	-2.489	70.6299	0.443131	1.06946	13.9804	0.0515781	1.86278	DNA-PKCS_A1295R
DNA-PKCS	3	missense	A1295S	DNA-PKCS	1295	1295	A	S	Saturation-Mutagenesis	-1.656	93.2077	-0.414	Neutral	0.832729	63	deleterious	-1.228	-3.541	70.6299	0.443131	1.06946	13.9804	0.0515781	1.86278	DNA-PKCS_A1295S
DNA-PKCS	3	missense	A1295T	DNA-PKCS	1295	1295	A	T	Saturation-Mutagenesis	-0.753	93.2077	-1.262	Neutral	0.832729	27	deleterious	-1.228	-3.395	70.6299	0.443131	1.06946	13.9804	0.0515781	1.86278	DNA-PKCS_A1295T
DNA-PKCS	2	missense	A1295V	DNA-PKCS	1295	1295	A	V	Non-Pathogenic	-1.079	93.2077	-1.502	Neutral	0.832729	-6	deleterious	-1.228	-3.081	70.6299	0.38624	0.963533	12.3527	0.0449278	1.62621	DNA-PKCS_A1295V
DNA-PKCS	3	missense	A1295W	DNA-PKCS	1295	1295	A	W	Saturation-Mutagenesis	-1.074	93.2077	-2.687	Deleterious	0.811081	48	deleterious	-1.374	-4.983	70.6299	0.38624	0.963533	12.3527	0.0449278	1.62621	DNA-PKCS_A1295W
DNA-PKCS	3	missense	A1295Y	DNA-PKCS	1295	1295	A	Y	Saturation-Mutagenesis	-1.578	93.2077	-1.409	Neutral	0.832729	10	deleterious	-1.228	-3.753	70.6299	0.38624	0.963533	12.3527	0.0449278	1.62621	DNA-PKCS_A1295Y
DNA-PKCS	3	missense	A1302C	DNA-PKCS	1302	1302	A	C	Saturation-Mutagenesis	-1.043	89.4272	-2.527	Deleterious	0.834418	63	deleterious	-1.19	-4.635	64.7839	1.05868	1.94592	16.1542	0.0647498	3.95788	DNA-PKCS_A1302C
DNA-PKCS	3	missense	A1302D	DNA-PKCS	1302	1302	A	D	Saturation-Mutagenesis	-1.179	89.4272	-3.79	Deleterious	0.834418	2	deleterious	-1.19	-4.932	64.7839	1.05868	1.94592	16.1542	0.0647498	3.95788	DNA-PKCS_A1302D
DNA-PKCS	3	missense	A1302E	DNA-PKCS	1302	1302	A	E	Saturation-Mutagenesis	-1.223	89.4272	-3.142	Deleterious	0.834418	7	deleterious	-1.19	-2.134	64.7839	1.05868	1.94592	16.1542	0.0647498	3.95788	DNA-PKCS_A1302E
DNA-PKCS	3	missense	A1302F	DNA-PKCS	1302	1302	A	F	Saturation-Mutagenesis	-0.677	89.4272	-4.024	Deleterious	0.834418	59	deleterious	-1.38	-2.837	64.7839	1.05868	1.94592	16.1542	0.0647498	3.95788	DNA-PKCS_A1302F
DNA-PKCS	1	missense	A1302G	DNA-PKCS	1302	1302	A	G	Pathogenic	-1.043	89.4272	-2.76	Deleterious	0.834418	29	deleterious	-1.19	-4.323	64.7839	1.05868	1.94592	16.1542	0.0647498	3.95788	DNA-PKCS_A1302G
DNA-PKCS	3	missense	A1302H	DNA-PKCS	1302	1302	A	H	Saturation-Mutagenesis	-0.75	89.4272	-3.89	Deleterious	0.834418	-61	deleterious	-1.19	-3.658	64.7839	1.05868	1.94592	16.1542	0.0647498	3.95788	DNA-PKCS_A1302H
DNA-PKCS	3	missense	A1302I	DNA-PKCS	1302	1302	A	I	Saturation-Mutagenesis	-0.482	89.4272	-3.409	Deleterious	0.834418	38	deleterious	-1.38	-4.126	64.7839	1.05868	1.94592	16.1542	0.0647498	3.95788	DNA-PKCS_A1302I
DNA-PKCS	3	missense	A1302K	DNA-PKCS	1302	1302	A	K	Saturation-Mutagenesis	-0.912	89.4272	-2.942	Deleterious	0.834418	-41	deleterious	-1.19	-3.873	64.7839	1.05868	1.94592	16.1542	0.0647498	3.95788	DNA-PKCS_A1302K
DNA-PKCS	3	missense	A1302L	DNA-PKCS	1302	1302	A	L	Saturation-Mutagenesis	-0.577	89.4272	-3.409	Deleterious	0.834418	7	deleterious	-1.38	-2.937	64.7839	1.05868	1.94592	16.1542	0.0647498	3.95788	DNA-PKCS_A1302L
DNA-PKCS	3	missense	A1302M	DNA-PKCS	1302	1302	A	M	Saturation-Mutagenesis	-1.504	89.4272	-3.209	Deleterious	0.834418	2	deleterious	-1.38	-3.202	64.7839	1.05868	1.94592	16.1542	0.0647498	3.95788	DNA-PKCS_A1302M
DNA-PKCS	3	missense	A1302N	DNA-PKCS	1302	1302	A	N	Saturation-Mutagenesis	-0.93	89.4272	-3.457	Deleterious	0.834418	14	deleterious	-1.19	-3.888	64.7839	1.05868	1.94592	16.1542	0.0647498	3.95788	DNA-PKCS_A1302N
DNA-PKCS	3	missense	A1302P	DNA-PKCS	1302	1302	A	P	Saturation-Mutagenesis	-0.905	89.4272	-3.209	Deleterious	0.834418	30	deleterious	-1.19	-4.284	64.7839	1.05868	1.94592	16.1542	0.0647498	3.95788	DNA-PKCS_A1302P
DNA-PKCS	3	missense	A1302Q	DNA-PKCS	1302	1302	A	Q	Saturation-Mutagenesis	-0.93	89.4272	-3.175	Deleterious	0.834418	35	deleterious	-1.19	-3.461	64.7839	1.05868	1.94592	16.1542	0.0647498	3.95788	DNA-PKCS_A1302Q
DNA-PKCS	3	missense	A1302R	DNA-PKCS	1302	1302	A	R	Saturation-Mutagenesis	-1.531	89.4272	-3.309	Deleterious	0.834418	-75	deleterious	-1.19	-2.305	64.7839	1.05868	1.94592	16.1542	0.0647498	3.95788	DNA-PKCS_A1302R
DNA-PKCS	3	missense	A1302S	DNA-PKCS	1302	1302	A	S	Saturation-Mutagenesis	-0.986	89.4272	-1.479	Neutral	0.834418	54	deleterious	-1.19	-2.933	64.7839	1.05868	1.94592	16.1542	0.0647498	3.95788	DNA-PKCS_A1302S
DNA-PKCS	2	missense	A1302T	DNA-PKCS	1302	1302	A	T	Non-Pathogenic	-0.634	89.4272	-2.394	Neutral	0.834418	40	deleterious	-1.19	-3.406	64.7839	1.05868	1.94592	16.1542	0.0647498	3.95788	DNA-PKCS_A1302T
DNA-PKCS	3	missense	A1302V	DNA-PKCS	1302	1302	A	V	Saturation-Mutagenesis	-0.461	89.4272	-2.794	Deleterious	0.834418	-4	deleterious	-1.38	-2.314	64.7839	1.05868	1.94592	16.1542	0.0647498	3.95788	DNA-PKCS_A1302V
DNA-PKCS	3	missense	A1302W	DNA-PKCS	1302	1302	A	W	Saturation-Mutagenesis	-0.679	89.4272	-4.972	Deleterious	0.834418	20	deleterious	-1.38	-3.317	64.7839	1.05868	1.94592	16.1542	0.0647498	3.95788	DNA-PKCS_A1302W
DNA-PKCS	3	missense	A1302Y	DNA-PKCS	1302	1302	A	Y	Saturation-Mutagenesis	-0.626	89.4272	-4.057	Deleterious	0.834418	51	deleterious	-1.38	-3.091	64.7839	1.05868	1.94592	16.1542	0.0647498	3.95788	DNA-PKCS_A1302Y
DNA-PKCS	3	missense	A1308C	DNA-PKCS	1308	1308	A	C	Saturation-Mutagenesis	-0.347	90.8472	-2.458	Neutral	0.776913	-30	deleterious	-2.087	-4.785	65.9214	0.352709	0.801303	11.1247	0.0417671	1.40931	DNA-PKCS_A1308C
DNA-PKCS	3	missense	A1308D	DNA-PKCS	1308	1308	A	D	Saturation-Mutagenesis	-0.191	90.8472	-2.731	Deleterious	0.776913	39	deleterious	-1.795	-3.913	65.9214	0.352709	0.801303	11.1247	0.0417671	1.40931	DNA-PKCS_A1308D
DNA-PKCS	3	missense	A1308E	DNA-PKCS	1308	1308	A	E	Saturation-Mutagenesis	-0.066	90.8472	-1.795	Neutral	0.776913	25	neutral	-1.795	-3.519	65.9214	0.352709	0.801303	11.1247	0.0417671	1.40931	DNA-PKCS_A1308E
DNA-PKCS	3	missense	A1308F	DNA-PKCS	1308	1308	A	F	Saturation-Mutagenesis	0.604	90.8472	-3.265	Deleterious	0.776913	-72	deleterious	-2.087	-4.003	65.9214	0.352709	0.801303	11.1247	0.0417671	1.40931	DNA-PKCS_A1308F
DNA-PKCS	3	missense	A1308G	DNA-PKCS	1308	1308	A	G	Saturation-Mutagenesis	-0.347	90.8472	-2.081	Neutral	0.776913	-48	neutral	-2.087	-2.715	65.9214	0.352709	0.801303	11.1247	0.0417671	1.40931	DNA-PKCS_A1308G
DNA-PKCS	3	missense	A1308H	DNA-PKCS	1308	1308	A	H	Saturation-Mutagenesis	0.002	90.8472	-3.076	Deleterious	0.776913	22	neutral	-1.795	-2.412	65.9214	0.352709	0.801303	11.1247	0.0417671	1.40931	DNA-PKCS_A1308H
DNA-PKCS	3	missense	A1308I	DNA-PKCS	1308	1308	A	I	Saturation-Mutagenesis	0.383	90.8472	-2.65	Deleterious	0.776913	-63	neutral	-2.087	-3.378	65.9214	0.352709	0.801303	11.1247	0.0417671	1.40931	DNA-PKCS_A1308I
DNA-PKCS	3	missense	A1308K	DNA-PKCS	1308	1308	A	K	Saturation-Mutagenesis	-0.031	90.8472	-2.161	Neutral	0.776913	13	neutral	-1.795	-3.567	65.9214	0.352709	0.801303	11.1247	0.0417671	1.40931	DNA-PKCS_A1308K
DNA-PKCS	3	missense	A1308L	DNA-PKCS	1308	1308	A	L	Saturation-Mutagenesis	0.441	90.8472	-2.761	Deleterious	0.776913	-60	neutral	-2.087	-2.385	65.9214	0.352709	0.801303	11.1247	0.0417671	1.40931	DNA-PKCS_A1308L
DNA-PKCS	3	missense	A1308M	DNA-PKCS	1308	1308	A	M	Saturation-Mutagenesis	0.508	90.8472	-2.628	Deleterious	0.776913	-55	neutral	-2.087	-3.861	65.9214	0.352709	0.801303	11.1247	0.0417671	1.40931	DNA-PKCS_A1308M
DNA-PKCS	3	missense	A1308N	DNA-PKCS	1308	1308	A	N	Saturation-Mutagenesis	-0.361	90.8472	-2.486	Neutral	0.776913	-58	deleterious	-1.795	-4.121	65.9214	0.352709	0.801303	11.1247	0.0417671	1.40931	DNA-PKCS_A1308N
DNA-PKCS	3	missense	A1308P	DNA-PKCS	1308	1308	A	P	Saturation-Mutagenesis	0.066	90.8472	-2.561	Deleterious	0.776913	-82	neutral	-2.087	-3.654	65.9214	0.352709	0.801303	11.1247	0.0417671	1.40931	DNA-PKCS_A1308P
DNA-PKCS	3	missense	A1308Q	DNA-PKCS	1308	1308	A	Q	Saturation-Mutagenesis	-0.361	90.8472	-2.195	Neutral	0.776913	-50	neutral	-2.087	-3.889	65.9214	0.352709	0.801303	11.1247	0.0417671	1.40931	DNA-PKCS_A1308Q
DNA-PKCS	3	missense	A1308R	DNA-PKCS	1308	1308	A	R	Saturation-Mutagenesis	0.104	90.8472	-2.317	Neutral	0.776913	17	deleterious	-1.795	-3.84	65.9214	0.352709	0.801303	11.1247	0.0417671	1.40931	DNA-PKCS_A1308R
DNA-PKCS	3	missense	A1308S	DNA-PKCS	1308	1308	A	S	Saturation-Mutagenesis	0.262	90.8472	-1.042	Neutral	0.776913	60	deleterious	-1.795	-4.73	65.9214	0.352709	0.801303	11.1247	0.0417671	1.40931	DNA-PKCS_A1308S
DNA-PKCS	3	missense	A1308T	DNA-PKCS	1308	1308	A	T	Saturation-Mutagenesis	-0.417	90.8472	-1.398	Neutral	0.776913	-48	neutral	-1.795	-2.865	65.9214	0.352709	0.801303	11.1247	0.0417671	1.40931	DNA-PKCS_A1308T
DNA-PKCS	3	missense	A1308V	DNA-PKCS	1308	1308	A	V	Saturation-Mutagenesis	0.353	90.8472	-2.035	Neutral	0.776913	-79	neutral	-2.087	-2.707	65.9214	0.352709	0.801303	11.1247	0.0417671	1.40931	DNA-PKCS_A1308V
DNA-PKCS	3	missense	A1308W	DNA-PKCS	1308	1308	A	W	Saturation-Mutagenesis	0.245	90.8472	-4.024	Deleterious	0.806526	-50	neutral	-2.087	-2.574	65.9214	0.352709	0.801303	11.1247	0.0417671	1.40931	DNA-PKCS_A1308W
DNA-PKCS	3	missense	A1308Y	DNA-PKCS	1308	1308	A	Y	Saturation-Mutagenesis	0.614	90.8472	-3.332	Deleterious	0.776913	-47	deleterious	-2.087	-4.846	65.9214	0.352709	0.801303	11.1247	0.0417671	1.40931	DNA-PKCS_A1308Y
DNA-PKCS	3	missense	A1380C	DNA-PKCS	1380	1380	A	C	Saturation-Mutagenesis	-0.579	84.2992	-1.675	Neutral	0.762188	50	neutral	-2.153	-2.382	77.4431	0.283857	0.689581	10.5921	0.0351212	1.04835	DNA-PKCS_A1380C
DNA-PKCS	3	missense	A1380D	DNA-PKCS	1380	1380	A	D	Saturation-Mutagenesis	-0.563	84.2992	-1.641	Neutral	0.762188	62	neutral	-2.153	-2.999	77.4431	0.283857	0.689581	10.5921	0.0351212	1.04835	DNA-PKCS_A1380D
DNA-PKCS	3	missense	A1380E	DNA-PKCS	1380	1380	A	E	Saturation-Mutagenesis	-0.529	84.2992	-1.141	Neutral	0.762188	52	neutral	-2.153	-3.477	77.4431	0.283857	0.689581	10.5921	0.0351212	1.04835	DNA-PKCS_A1380E
DNA-PKCS	3	missense	A1380F	DNA-PKCS	1380	1380	A	F	Saturation-Mutagenesis	0.482	84.2992	-2.104	Neutral	0.762188	55	deleterious	-2.094	-3.807	77.4431	0.283857	0.689581	10.5921	0.0351212	1.04835	DNA-PKCS_A1380F
DNA-PKCS	3	missense	A1380G	DNA-PKCS	1380	1380	A	G	Saturation-Mutagenesis	-0.579	84.2992	-1.476	Neutral	0.762188	62	neutral	-2.153	-2.69	77.4431	0.283857	0.689581	10.5921	0.0351212	1.04835	DNA-PKCS_A1380G
DNA-PKCS	3	missense	A1380H	DNA-PKCS	1380	1380	A	H	Saturation-Mutagenesis	-0.154	84.2992	-1.37	Neutral	0.762188	28	deleterious	-2.153	-3.824	77.4431	0.283857	0.689581	10.5921	0.0351212	1.04835	DNA-PKCS_A1380H
DNA-PKCS	3	missense	A1380I	DNA-PKCS	1380	1380	A	I	Saturation-Mutagenesis	-0.118	84.2992	-1.529	Neutral	0.762188	52	deleterious	-2.094	-3.973	77.4431	0.283857	0.689581	10.5921	0.0351212	1.04835	DNA-PKCS_A1380I
DNA-PKCS	3	missense	A1380K	DNA-PKCS	1380	1380	A	K	Saturation-Mutagenesis	-0.285	84.2992	-1.205	Neutral	0.762188	-8	deleterious	-2.153	-3.999	77.4431	0.283857	0.689581	10.5921	0.0351212	1.04835	DNA-PKCS_A1380K
DNA-PKCS	3	missense	A1380L	DNA-PKCS	1380	1380	A	L	Saturation-Mutagenesis	-0.196	84.2992	-1.428	Neutral	0.762188	52	deleterious	-2.094	-4.785	77.4431	0.283857	0.689581	10.5921	0.0351212	1.04835	DNA-PKCS_A1380L
DNA-PKCS	3	missense	A1380M	DNA-PKCS	1380	1380	A	M	Saturation-Mutagenesis	-1.123	84.2992	-0.901	Neutral	0.762188	56	deleterious	-2.094	-3.647	77.4431	0.283857	0.689581	10.5921	0.0351212	1.04835	DNA-PKCS_A1380M
DNA-PKCS	3	missense	A1380N	DNA-PKCS	1380	1380	A	N	Saturation-Mutagenesis	-0.491	84.2992	-1.14	Neutral	0.762188	28	neutral	-2.153	-3.071	77.4431	0.283857	0.689581	10.5921	0.0351212	1.04835	DNA-PKCS_A1380N
DNA-PKCS	3	missense	A1380P	DNA-PKCS	1380	1380	A	P	Saturation-Mutagenesis	-0.425	84.2992	-1.737	Neutral	0.762188	62	neutral	-2.153	-2.807	77.4431	0.283857	0.689581	10.5921	0.0351212	1.04835	DNA-PKCS_A1380P
DNA-PKCS	3	missense	A1380Q	DNA-PKCS	1380	1380	A	Q	Saturation-Mutagenesis	-0.491	84.2992	-0.632	Neutral	0.762188	31	neutral	-2.153	-2.422	77.4431	0.283857	0.689581	10.5921	0.0351212	1.04835	DNA-PKCS_A1380Q
DNA-PKCS	3	missense	A1380R	DNA-PKCS	1380	1380	A	R	Saturation-Mutagenesis	-0.446	84.2992	-1.483	Neutral	0.762188	82	neutral	-2.153	-2.589	77.4431	0.283857	0.689581	10.5921	0.0351212	1.04835	DNA-PKCS_A1380R
DNA-PKCS	3	missense	A1380S	DNA-PKCS	1380	1380	A	S	Saturation-Mutagenesis	-0.251	84.2992	0.384	Neutral	0.762188	36	deleterious	-2.153	-3.937	77.4431	0.283857	0.689581	10.5921	0.0351212	1.04835	DNA-PKCS_A1380S
DNA-PKCS	2	missense	A1380T	DNA-PKCS	1380	1380	A	T	Non-Pathogenic	-0.261	84.2992	-0.424	Neutral	0.762188	26	neutral	-2.153	-2.415	77.4431	0.283857	0.689581	10.5921	0.0351212	1.04835	DNA-PKCS_A1380T
DNA-PKCS	2	missense	A1380V	DNA-PKCS	1380	1380	A	V	Non-Pathogenic	-0.102	84.2992	-1.258	Neutral	0.762188	55	deleterious	-2.153	-3.99	77.4431	0.283857	0.689581	10.5921	0.0351212	1.04835	DNA-PKCS_A1380V
DNA-PKCS	3	missense	A1380W	DNA-PKCS	1380	1380	A	W	Saturation-Mutagenesis	-0.393	84.2992	-2.911	Deleterious	0.762188	50	deleterious	-2.094	-3.575	77.4431	0.283857	0.689581	10.5921	0.0351212	1.04835	DNA-PKCS_A1380W
DNA-PKCS	3	missense	A1380Y	DNA-PKCS	1380	1380	A	Y	Saturation-Mutagenesis	-1.082	84.2992	-1.84	Neutral	0.762188	58	neutral	-2.094	-2.645	77.4431	0.283857	0.689581	10.5921	0.0351212	1.04835	DNA-PKCS_A1380Y
DNA-PKCS	3	missense	A1393C	DNA-PKCS	1393	1393	A	C	Saturation-Mutagenesis	-0.096	70.9694	-1.603	Neutral	0.757426	41	deleterious	-1.316	-4.648	72.1488	0.338787	0.902521	13.154	0.0405507	1.40847	DNA-PKCS_A1393C
DNA-PKCS	2	missense	A1393D	DNA-PKCS	1393	1393	A	D	Non-Pathogenic	0.039	70.9694	1.176	Neutral	0.757426	48	deleterious	-1.316	-3.356	72.1488	0.338787	0.902521	13.154	0.0405507	1.40847	DNA-PKCS_A1393D
DNA-PKCS	3	missense	A1393E	DNA-PKCS	1393	1393	A	E	Saturation-Mutagenesis	0.208	70.9694	1.781	Neutral	0.757426	38	deleterious	-1.316	-3.389	72.1488	0.338787	0.902521	13.154	0.0405507	1.40847	DNA-PKCS_A1393E
DNA-PKCS	3	missense	A1393F	DNA-PKCS	1393	1393	A	F	Saturation-Mutagenesis	-0.458	70.9694	-1.637	Neutral	0.757426	36	deleterious	-1.316	-4.376	72.1488	0.359242	0.85125	12.7156	0.0471716	1.39083	DNA-PKCS_A1393F
DNA-PKCS	3	missense	A1393G	DNA-PKCS	1393	1393	A	G	Saturation-Mutagenesis	-0.096	70.9694	-0.082	Neutral	0.757426	42	deleterious	-1.316	-3.006	72.1488	0.359242	0.85125	12.7156	0.0471716	1.39083	DNA-PKCS_A1393G
DNA-PKCS	3	missense	A1393H	DNA-PKCS	1393	1393	A	H	Saturation-Mutagenesis	0.13	70.9694	0.15	Neutral	0.757426	0	deleterious	-1.316	-3.78	72.1488	0.338787	0.902521	13.154	0.0405507	1.40847	DNA-PKCS_A1393H
DNA-PKCS	3	missense	A1393I	DNA-PKCS	1393	1393	A	I	Saturation-Mutagenesis	0.719	70.9694	-1.461	Neutral	0.757426	37	deleterious	-1.316	-3.459	72.1488	0.359242	0.85125	12.7156	0.0471716	1.39083	DNA-PKCS_A1393I
DNA-PKCS	3	missense	A1393K	DNA-PKCS	1393	1393	A	K	Saturation-Mutagenesis	0.129	70.9694	1.569	Neutral	0.757426	-22	deleterious	-1.316	-4.429	72.1488	0.338787	0.902521	13.154	0.0405507	1.40847	DNA-PKCS_A1393K
DNA-PKCS	3	missense	A1393L	DNA-PKCS	1393	1393	A	L	Saturation-Mutagenesis	0.803	70.9694	-1.382	Neutral	0.757426	34	deleterious	-1.316	-3.663	72.1488	0.359242	0.85125	12.7156	0.0471716	1.39083	DNA-PKCS_A1393L
DNA-PKCS	3	missense	A1393M	DNA-PKCS	1393	1393	A	M	Saturation-Mutagenesis	-1.446	70.9694	-0.594	Neutral	0.757426	36	deleterious	-1.316	-3.203	72.1488	0.359242	0.85125	12.7156	0.0471716	1.39083	DNA-PKCS_A1393M
DNA-PKCS	3	missense	A1393N	DNA-PKCS	1393	1393	A	N	Saturation-Mutagenesis	-0.137	70.9694	1.623	Neutral	0.757426	6	deleterious	-1.316	-3.408	72.1488	0.338787	0.902521	13.154	0.0405507	1.40847	DNA-PKCS_A1393N
DNA-PKCS	3	missense	A1393P	DNA-PKCS	1393	1393	A	P	Saturation-Mutagenesis	0.389	70.9694	-0.097	Neutral	0.757426	43	deleterious	-1.316	-3.779	72.1488	0.359242	0.85125	12.7156	0.0471716	1.39083	DNA-PKCS_A1393P
DNA-PKCS	3	missense	A1393Q	DNA-PKCS	1393	1393	A	Q	Saturation-Mutagenesis	-0.137	70.9694	1.177	Neutral	0.757426	2	deleterious	-1.316	-3.772	72.1488	0.338787	0.902521	13.154	0.0405507	1.40847	DNA-PKCS_A1393Q
DNA-PKCS	3	missense	A1393R	DNA-PKCS	1393	1393	A	R	Saturation-Mutagenesis	0.383	70.9694	0.792	Neutral	0.757426	46	neutral	-2.383	-4.128	72.1488	0.338787	0.902521	13.154	0.0405507	1.40847	DNA-PKCS_A1393R
DNA-PKCS	3	missense	A1393S	DNA-PKCS	1393	1393	A	S	Saturation-Mutagenesis	0.545	70.9694	1.175	Neutral	0.757426	7	deleterious	-1.316	-3.339	72.1488	0.338787	0.902521	13.154	0.0405507	1.40847	DNA-PKCS_A1393S
DNA-PKCS	3	missense	A1393T	DNA-PKCS	1393	1393	A	T	Saturation-Mutagenesis	-0.278	70.9694	0.373	Neutral	0.757426	-2	deleterious	-1.316	-3.096	72.1488	0.338787	0.902521	13.154	0.0405507	1.40847	DNA-PKCS_A1393T
DNA-PKCS	3	missense	A1393V	DNA-PKCS	1393	1393	A	V	Saturation-Mutagenesis	0.691	70.9694	-0.997	Neutral	0.757426	44	deleterious	-1.316	-2.773	72.1488	0.359242	0.85125	12.7156	0.0471716	1.39083	DNA-PKCS_A1393V
DNA-PKCS	3	missense	A1393W	DNA-PKCS	1393	1393	A	W	Saturation-Mutagenesis	-0.542	70.9694	-2.182	Neutral	0.757426	27	deleterious	-1.316	-3.625	72.1488	0.359242	0.85125	12.7156	0.0471716	1.39083	DNA-PKCS_A1393W
DNA-PKCS	3	missense	A1393Y	DNA-PKCS	1393	1393	A	Y	Saturation-Mutagenesis	-0.464	70.9694	-1.172	Neutral	0.757426	41	deleterious	-1.316	-2.451	72.1488	0.359242	0.85125	12.7156	0.0471716	1.39083	DNA-PKCS_A1393Y
DNA-PKCS	3	missense	A1405C	DNA-PKCS	1405	1405	A	C	Saturation-Mutagenesis	-1.217	85.337	-2.26	Neutral	0.788235	-18	deleterious	-1.89	-4.108	72.4426	1.09303	2.45374	23.2032	0.0975948	3.78467	DNA-PKCS_A1405C
DNA-PKCS	3	missense	A1405D	DNA-PKCS	1405	1405	A	D	Saturation-Mutagenesis	-1.546	85.337	-2.974	Deleterious	0.788235	-43	deleterious	-1.89	-3.758	72.4426	1.09303	2.45374	23.2032	0.0975948	3.78467	DNA-PKCS_A1405D
DNA-PKCS	3	missense	A1405E	DNA-PKCS	1405	1405	A	E	Saturation-Mutagenesis	-1.714	85.337	-2.692	Deleterious	0.788235	-14	neutral	-1.89	-3.006	72.4426	1.09303	2.45374	23.2032	0.0975948	3.78467	DNA-PKCS_A1405E
DNA-PKCS	3	missense	A1405F	DNA-PKCS	1405	1405	A	F	Saturation-Mutagenesis	0.24	85.337	-3.24	Deleterious	0.788235	13	neutral	-2.097	-1.943	72.4426	0.868503	2.8267	24.5412	0.0893204	3.37568	DNA-PKCS_A1405F
DNA-PKCS	3	missense	A1405G	DNA-PKCS	1405	1405	A	G	Saturation-Mutagenesis	-1.217	85.337	-2.377	Neutral	0.788235	-24	deleterious	-1.89	-4.184	72.4426	0.868503	2.8267	24.5412	0.0893204	3.37568	DNA-PKCS_A1405G
DNA-PKCS	3	missense	A1405H	DNA-PKCS	1405	1405	A	H	Saturation-Mutagenesis	-1.253	85.337	-3.59	Deleterious	0.788235	-33	deleterious	-1.89	-4.886	72.4426	1.09303	2.45374	23.2032	0.0975948	3.78467	DNA-PKCS_A1405H
DNA-PKCS	3	missense	A1405I	DNA-PKCS	1405	1405	A	I	Saturation-Mutagenesis	-1.115	85.337	-2.425	Neutral	0.788235	-4	neutral	-2.097	-2.528	72.4426	0.868503	2.8267	24.5412	0.0893204	3.37568	DNA-PKCS_A1405I
DNA-PKCS	3	missense	A1405K	DNA-PKCS	1405	1405	A	K	Saturation-Mutagenesis	-1.468	85.337	-2.359	Neutral	0.788235	-35	neutral	-1.89	-3.361	72.4426	1.09303	2.45374	23.2032	0.0975948	3.78467	DNA-PKCS_A1405K
DNA-PKCS	3	missense	A1405L	DNA-PKCS	1405	1405	A	L	Saturation-Mutagenesis	-1.396	85.337	-2.192	Neutral	0.788235	-13	neutral	-2.097	-3.34	72.4426	0.868503	2.8267	24.5412	0.0893204	3.37568	DNA-PKCS_A1405L
DNA-PKCS	3	missense	A1405M	DNA-PKCS	1405	1405	A	M	Saturation-Mutagenesis	-0.32	85.337	-2.275	Neutral	0.788235	17	neutral	-2.097	-2.308	72.4426	0.868503	2.8267	24.5412	0.0893204	3.37568	DNA-PKCS_A1405M
DNA-PKCS	3	missense	A1405N	DNA-PKCS	1405	1405	A	N	Saturation-Mutagenesis	-1.052	85.337	-3.124	Deleterious	0.788235	-50	neutral	-1.89	-2.492	72.4426	1.09303	2.45374	23.2032	0.0975948	3.78467	DNA-PKCS_A1405N
DNA-PKCS	3	missense	A1405P	DNA-PKCS	1405	1405	A	P	Saturation-Mutagenesis	-1.428	85.337	-2.875	Deleterious	0.788235	-3	neutral	-2.097	-2.692	72.4426	0.868503	2.8267	24.5412	0.0893204	3.37568	DNA-PKCS_A1405P
DNA-PKCS	3	missense	A1405Q	DNA-PKCS	1405	1405	A	Q	Saturation-Mutagenesis	-1.052	85.337	-2.625	Deleterious	0.788235	-36	deleterious	-1.89	-4.473	72.4426	1.09303	2.45374	23.2032	0.0975948	3.78467	DNA-PKCS_A1405Q
DNA-PKCS	3	missense	A1405R	DNA-PKCS	1405	1405	A	R	Saturation-Mutagenesis	-1.921	85.337	-2.775	Deleterious	0.788235	69	neutral	-1.89	-3.697	72.4426	1.09303	2.45374	23.2032	0.0975948	3.78467	DNA-PKCS_A1405R
DNA-PKCS	3	missense	A1405S	DNA-PKCS	1405	1405	A	S	Saturation-Mutagenesis	-1.894	85.337	-1.362	Neutral	0.788235	-25	neutral	-1.89	-2.524	72.4426	1.09303	2.45374	23.2032	0.0975948	3.78467	DNA-PKCS_A1405S
DNA-PKCS	3	missense	A1405T	DNA-PKCS	1405	1405	A	T	Saturation-Mutagenesis	-0.601	85.337	-2.094	Neutral	0.788235	-62	neutral	-1.89	-3.525	72.4426	1.09303	2.45374	23.2032	0.0975948	3.78467	DNA-PKCS_A1405T
DNA-PKCS	3	missense	A1405V	DNA-PKCS	1405	1405	A	V	Saturation-Mutagenesis	-1.081	85.337	-1.977	Neutral	0.788235	-38	deleterious	-2.097	-4.35	72.4426	0.868503	2.8267	24.5412	0.0893204	3.37568	DNA-PKCS_A1405V
DNA-PKCS	3	missense	A1405W	DNA-PKCS	1405	1405	A	W	Saturation-Mutagenesis	-0.091	85.337	-4.172	Deleterious	0.788235	2	neutral	-2.097	-3.679	72.4426	0.868503	2.8267	24.5412	0.0893204	3.37568	DNA-PKCS_A1405W
DNA-PKCS	3	missense	A1405Y	DNA-PKCS	1405	1405	A	Y	Saturation-Mutagenesis	-0.261	85.337	-3.474	Deleterious	0.788235	26	neutral	-2.097	-2.352	72.4426	0.868503	2.8267	24.5412	0.0893204	3.37568	DNA-PKCS_A1405Y
DNA-PKCS	3	missense	A1425C	DNA-PKCS	1425	1425	A	C	Saturation-Mutagenesis	-0.601	93.271	-1.696	Neutral	0.884868	-27	deleterious	-1.582	-4.136	91.5016	0.339979	0.727902	12.8405	0.0468762	1.24462	DNA-PKCS_A1425C
DNA-PKCS	3	missense	A1425D	DNA-PKCS	1425	1425	A	D	Saturation-Mutagenesis	-0.534	93.271	-1.187	Neutral	0.884868	13	deleterious	-1.582	-3.749	91.5016	0.339979	0.727902	12.8405	0.0468762	1.24462	DNA-PKCS_A1425D
DNA-PKCS	3	missense	A1425E	DNA-PKCS	1425	1425	A	E	Saturation-Mutagenesis	-0.474	93.271	-0.89	Neutral	0.884868	37	deleterious	-1.582	-2.781	91.5016	0.339979	0.727902	12.8405	0.0468762	1.24462	DNA-PKCS_A1425E
DNA-PKCS	3	missense	A1425F	DNA-PKCS	1425	1425	A	F	Saturation-Mutagenesis	0.209	93.271	-1.984	Neutral	0.884868	-80	deleterious	-1.277	-3.395	91.5016	0.338943	0.752998	12.5536	0.0453152	1.22307	DNA-PKCS_A1425F
DNA-PKCS	3	missense	A1425G	DNA-PKCS	1425	1425	A	G	Saturation-Mutagenesis	-0.601	93.271	-1.335	Neutral	0.884868	-33	deleterious	-1.582	-4.171	91.5016	0.338943	0.752998	12.5536	0.0453152	1.22307	DNA-PKCS_A1425G
DNA-PKCS	3	missense	A1425H	DNA-PKCS	1425	1425	A	H	Saturation-Mutagenesis	-0.246	93.271	-1.722	Neutral	0.884868	17	deleterious	-1.582	-2.742	91.5016	0.339979	0.727902	12.8405	0.0468762	1.24462	DNA-PKCS_A1425H
DNA-PKCS	3	missense	A1425I	DNA-PKCS	1425	1425	A	I	Saturation-Mutagenesis	0.276	93.271	-1.258	Neutral	0.884868	3	deleterious	-1.277	-3.541	91.5016	0.338943	0.752998	12.5536	0.0453152	1.22307	DNA-PKCS_A1425I
DNA-PKCS	3	missense	A1425K	DNA-PKCS	1425	1425	A	K	Saturation-Mutagenesis	-0.316	93.271	-0.873	Neutral	0.884868	-12	neutral	-1.582	-2.182	91.5016	0.339979	0.727902	12.8405	0.0468762	1.24462	DNA-PKCS_A1425K
DNA-PKCS	3	missense	A1425L	DNA-PKCS	1425	1425	A	L	Saturation-Mutagenesis	0.333	93.271	-1.166	Neutral	0.884868	-64	deleterious	-1.277	-3.157	91.5016	0.338943	0.752998	12.5536	0.0453152	1.22307	DNA-PKCS_A1425L
DNA-PKCS	3	missense	A1425M	DNA-PKCS	1425	1425	A	M	Saturation-Mutagenesis	-0.568	93.271	-1.131	Neutral	0.884868	-76	deleterious	-1.277	-3.233	91.5016	0.338943	0.752998	12.5536	0.0453152	1.22307	DNA-PKCS_A1425M
DNA-PKCS	3	missense	A1425N	DNA-PKCS	1425	1425	A	N	Saturation-Mutagenesis	-0.58	93.271	-1.022	Neutral	0.884868	-33	deleterious	-1.582	-3.354	91.5016	0.339979	0.727902	12.8405	0.0468762	1.24462	DNA-PKCS_A1425N
DNA-PKCS	3	missense	A1425P	DNA-PKCS	1425	1425	A	P	Saturation-Mutagenesis	-0.298	93.271	-0.961	Neutral	0.884868	36	deleterious	-1.277	-3.237	91.5016	0.338943	0.752998	12.5536	0.0453152	1.22307	DNA-PKCS_A1425P
DNA-PKCS	3	missense	A1425Q	DNA-PKCS	1425	1425	A	Q	Saturation-Mutagenesis	-0.58	93.271	-0.857	Neutral	0.884868	4	deleterious	-1.582	-4.512	91.5016	0.339979	0.727902	12.8405	0.0468762	1.24462	DNA-PKCS_A1425Q
DNA-PKCS	3	missense	A1425R	DNA-PKCS	1425	1425	A	R	Saturation-Mutagenesis	-0.579	93.271	-1.095	Neutral	0.884868	27	deleterious	-1.582	-3.705	91.5016	0.339979	0.727902	12.8405	0.0468762	1.24462	DNA-PKCS_A1425R
DNA-PKCS	3	missense	A1425S	DNA-PKCS	1425	1425	A	S	Saturation-Mutagenesis	-0.146	93.271	-0.187	Neutral	0.884868	-10	deleterious	-1.582	-3.53	91.5016	0.339979	0.727902	12.8405	0.0468762	1.24462	DNA-PKCS_A1425S
DNA-PKCS	3	missense	A1425T	DNA-PKCS	1425	1425	A	T	Saturation-Mutagenesis	-0.549	93.271	-0.74	Neutral	0.884868	-3	deleterious	-1.582	-3.84	91.5016	0.339979	0.727902	12.8405	0.0468762	1.24462	DNA-PKCS_A1425T
DNA-PKCS	3	missense	A1425V	DNA-PKCS	1425	1425	A	V	Saturation-Mutagenesis	0.252	93.271	-0.977	Neutral	0.884868	15	deleterious	-1.277	-4.458	91.5016	0.338943	0.752998	12.5536	0.0453152	1.22307	DNA-PKCS_A1425V
DNA-PKCS	3	missense	A1425W	DNA-PKCS	1425	1425	A	W	Saturation-Mutagenesis	-0.3	93.271	-2.885	Deleterious	0.884868	-23	deleterious	-1.277	-3.617	91.5016	0.338943	0.752998	12.5536	0.0453152	1.22307	DNA-PKCS_A1425W
DNA-PKCS	3	missense	A1425Y	DNA-PKCS	1425	1425	A	Y	Saturation-Mutagenesis	-0.592	93.271	-1.933	Neutral	0.884868	-35	deleterious	-1.277	-3.572	91.5016	0.338943	0.752998	12.5536	0.0453152	1.22307	DNA-PKCS_A1425Y
DNA-PKCS	3	missense	A1433C	DNA-PKCS	1433	1433	A	C	Saturation-Mutagenesis	-1.15	86.8016	-1.975	Neutral	0.851675	-3	neutral	-2.122	-2.575	83.0165	1.07546	2.76283	21.4351	0.0847769	3.97382	DNA-PKCS_A1433C
DNA-PKCS	3	missense	A1433D	DNA-PKCS	1433	1433	A	D	Saturation-Mutagenesis	-1.707	86.8016	-1.714	Neutral	0.851675	-56	deleterious	-1.886	-3.772	83.0165	1.07546	2.76283	21.4351	0.0847769	3.97382	DNA-PKCS_A1433D
DNA-PKCS	3	missense	A1433E	DNA-PKCS	1433	1433	A	E	Saturation-Mutagenesis	-1.871	86.8016	-1.68	Neutral	0.851675	-36	deleterious	-1.886	-4.033	83.0165	1.07546	2.76283	21.4351	0.0847769	3.97382	DNA-PKCS_A1433E
DNA-PKCS	3	missense	A1433F	DNA-PKCS	1433	1433	A	F	Saturation-Mutagenesis	-0.533	86.8016	-2.574	Deleterious	0.851675	-2	deleterious	-2.122	-3.933	83.0165	1.07546	2.76283	21.4351	0.0847769	3.97382	DNA-PKCS_A1433F
DNA-PKCS	3	missense	A1433G	DNA-PKCS	1433	1433	A	G	Saturation-Mutagenesis	-1.15	86.8016	-1.369	Neutral	0.851675	-35	neutral	-2.122	-3.462	83.0165	1.07546	2.76283	21.4351	0.0847769	3.97382	DNA-PKCS_A1433G
DNA-PKCS	3	missense	A1433H	DNA-PKCS	1433	1433	A	H	Saturation-Mutagenesis	-1.482	86.8016	-2.023	Neutral	0.851675	-53	neutral	-1.886	-1.848	83.0165	1.07546	2.76283	21.4351	0.0847769	3.97382	DNA-PKCS_A1433H
DNA-PKCS	3	missense	A1433I	DNA-PKCS	1433	1433	A	I	Saturation-Mutagenesis	-1.247	86.8016	-2.094	Neutral	0.851675	-15	deleterious	-2.122	-3.855	83.0165	1.07546	2.76283	21.4351	0.0847769	3.97382	DNA-PKCS_A1433I
DNA-PKCS	3	missense	A1433K	DNA-PKCS	1433	1433	A	K	Saturation-Mutagenesis	-1.676	86.8016	-1.747	Neutral	0.851675	-48	neutral	-1.886	-2.544	83.0165	1.07546	2.76283	21.4351	0.0847769	3.97382	DNA-PKCS_A1433K
DNA-PKCS	3	missense	A1433L	DNA-PKCS	1433	1433	A	L	Saturation-Mutagenesis	-1.607	86.8016	-1.761	Neutral	0.851675	-5	deleterious	-2.122	-4.767	83.0165	1.07546	2.76283	21.4351	0.0847769	3.97382	DNA-PKCS_A1433L
DNA-PKCS	3	missense	A1433M	DNA-PKCS	1433	1433	A	M	Saturation-Mutagenesis	-1.904	86.8016	-1.776	Neutral	0.851675	4	deleterious	-2.122	-3.601	83.0165	1.07546	2.76283	21.4351	0.0847769	3.97382	DNA-PKCS_A1433M
DNA-PKCS	3	missense	A1433N	DNA-PKCS	1433	1433	A	N	Saturation-Mutagenesis	-0.993	86.8016	-1.05	Neutral	0.851675	-65	deleterious	-2.122	-3.554	83.0165	1.07546	2.76283	21.4351	0.0847769	3.97382	DNA-PKCS_A1433N
DNA-PKCS	3	missense	A1433P	DNA-PKCS	1433	1433	A	P	Saturation-Mutagenesis	-1.542	86.8016	-1.476	Neutral	0.851675	-13	neutral	-2.122	-3.424	83.0165	1.07546	2.76283	21.4351	0.0847769	3.97382	DNA-PKCS_A1433P
DNA-PKCS	3	missense	A1433Q	DNA-PKCS	1433	1433	A	Q	Saturation-Mutagenesis	-0.993	86.8016	-1.613	Neutral	0.851675	-48	neutral	-2.122	-2.583	83.0165	1.07546	2.76283	21.4351	0.0847769	3.97382	DNA-PKCS_A1433Q
DNA-PKCS	3	missense	A1433R	DNA-PKCS	1433	1433	A	R	Saturation-Mutagenesis	-2.012	86.8016	-1.854	Neutral	0.851675	48	neutral	-1.886	-2.259	83.0165	1.07546	2.76283	21.4351	0.0847769	3.97382	DNA-PKCS_A1433R
DNA-PKCS	3	missense	A1433S	DNA-PKCS	1433	1433	A	S	Saturation-Mutagenesis	-2.123	86.8016	-0.18	Neutral	0.851675	-38	deleterious	-2.122	-3.889	83.0165	1.07546	2.76283	21.4351	0.0847769	3.97382	DNA-PKCS_A1433S
DNA-PKCS	3	missense	A1433T	DNA-PKCS	1433	1433	A	T	Saturation-Mutagenesis	-0.576	86.8016	-1.218	Neutral	0.851675	-69	deleterious	-2.122	-4.72	83.0165	1.07546	2.76283	21.4351	0.0847769	3.97382	DNA-PKCS_A1433T
DNA-PKCS	3	missense	A1433V	DNA-PKCS	1433	1433	A	V	Saturation-Mutagenesis	-1.201	86.8016	-1.814	Neutral	0.851675	-6	deleterious	-2.122	-3.861	83.0165	1.07546	2.76283	21.4351	0.0847769	3.97382	DNA-PKCS_A1433V
DNA-PKCS	3	missense	A1433W	DNA-PKCS	1433	1433	A	W	Saturation-Mutagenesis	-0.98	86.8016	-3.204	Deleterious	0.851675	10	neutral	-2.122	-2.312	83.0165	1.07546	2.76283	21.4351	0.0847769	3.97382	DNA-PKCS_A1433W
DNA-PKCS	3	missense	A1433Y	DNA-PKCS	1433	1433	A	Y	Saturation-Mutagenesis	-1.664	86.8016	-2.596	Deleterious	0.851675	14	neutral	-2.122	-3.103	83.0165	1.07546	2.76283	21.4351	0.0847769	3.97382	DNA-PKCS_A1433Y
DNA-PKCS	3	missense	A1441C	DNA-PKCS	1441	1441	A	C	Saturation-Mutagenesis	-1.162	80.361	-2.019	Neutral	0.825206	27	neutral	-2.223	-2.623	86.0524	0.45606	0.976908	14.3883	0.047886	1.76111	DNA-PKCS_A1441C
DNA-PKCS	3	missense	A1441D	DNA-PKCS	1441	1441	A	D	Saturation-Mutagenesis	-1.09	80.361	-2.307	Neutral	0.825206	33	neutral	-2.223	-2.725	86.0524	0.45606	0.976908	14.3883	0.047886	1.76111	DNA-PKCS_A1441D
DNA-PKCS	3	missense	A1441E	DNA-PKCS	1441	1441	A	E	Saturation-Mutagenesis	-1.125	80.361	-1.745	Neutral	0.825206	26	neutral	-2.223	-2.496	86.0524	0.45606	0.976908	14.3883	0.047886	1.76111	DNA-PKCS_A1441E
DNA-PKCS	3	missense	A1441F	DNA-PKCS	1441	1441	A	F	Saturation-Mutagenesis	-0.053	80.361	-2.912	Deleterious	0.825206	18	deleterious	-2.223	-4.247	86.0524	0.458593	1.07851	14.2059	0.0473598	1.78901	DNA-PKCS_A1441F
DNA-PKCS	2	missense	A1441G	DNA-PKCS	1441	1441	A	G	Non-Pathogenic	-1.162	80.361	-1.752	Neutral	0.825206	25	neutral	-2.223	-3.926	86.0524	0.458593	1.07851	14.2059	0.0473598	1.78901	DNA-PKCS_A1441G
DNA-PKCS	3	missense	A1441H	DNA-PKCS	1441	1441	A	H	Saturation-Mutagenesis	-0.781	80.361	-2.577	Deleterious	0.825206	-14	deleterious	-2.223	-4.554	86.0524	0.45606	0.976908	14.3883	0.047886	1.76111	DNA-PKCS_A1441H
DNA-PKCS	3	missense	A1441I	DNA-PKCS	1441	1441	A	I	Saturation-Mutagenesis	-0.325	80.361	-2.249	Neutral	0.825206	17	neutral	-2.223	-2.667	86.0524	0.458593	1.07851	14.2059	0.0473598	1.78901	DNA-PKCS_A1441I
DNA-PKCS	3	missense	A1441K	DNA-PKCS	1441	1441	A	K	Saturation-Mutagenesis	-0.906	80.361	-1.379	Neutral	0.825206	-50	neutral	-2.223	-3.442	86.0524	0.45606	0.976908	14.3883	0.047886	1.76111	DNA-PKCS_A1441K
DNA-PKCS	3	missense	A1441L	DNA-PKCS	1441	1441	A	L	Saturation-Mutagenesis	-0.3	80.361	-2.116	Neutral	0.825206	13	neutral	-2.223	-3.345	86.0524	0.458593	1.07851	14.2059	0.0473598	1.78901	DNA-PKCS_A1441L
DNA-PKCS	3	missense	A1441M	DNA-PKCS	1441	1441	A	M	Saturation-Mutagenesis	-0.565	80.361	-2.08	Neutral	0.825206	17	deleterious	-2.223	-4.591	86.0524	0.458593	1.07851	14.2059	0.0473598	1.78901	DNA-PKCS_A1441M
DNA-PKCS	3	missense	A1441N	DNA-PKCS	1441	1441	A	N	Saturation-Mutagenesis	-1.089	80.361	-1.904	Neutral	0.825206	-24	neutral	-2.223	-2.703	86.0524	0.45606	0.976908	14.3883	0.047886	1.76111	DNA-PKCS_A1441N
DNA-PKCS	3	missense	A1441P	DNA-PKCS	1441	1441	A	P	Saturation-Mutagenesis	-0.869	80.361	-1.847	Neutral	0.825206	27	neutral	-2.223	-2.577	86.0524	0.458593	1.07851	14.2059	0.0473598	1.78901	DNA-PKCS_A1441P
DNA-PKCS	3	missense	A1441Q	DNA-PKCS	1441	1441	A	Q	Saturation-Mutagenesis	-1.089	80.361	-1.845	Neutral	0.825206	-10	deleterious	-2.223	-5.009	86.0524	0.45606	0.976908	14.3883	0.047886	1.76111	DNA-PKCS_A1441Q
DNA-PKCS	3	missense	A1441R	DNA-PKCS	1441	1441	A	R	Saturation-Mutagenesis	-1.398	80.361	-1.714	Neutral	0.825206	42	neutral	-2.223	-2.924	86.0524	0.45606	0.976908	14.3883	0.047886	1.76111	DNA-PKCS_A1441R
DNA-PKCS	3	missense	A1441S	DNA-PKCS	1441	1441	A	S	Saturation-Mutagenesis	-0.837	80.361	-0.645	Neutral	0.825206	-9	neutral	-2.223	-2.483	86.0524	0.45606	0.976908	14.3883	0.047886	1.76111	DNA-PKCS_A1441S
DNA-PKCS	2	missense	A1441T	DNA-PKCS	1441	1441	A	T	Non-Pathogenic	-0.9	80.361	-1.039	Neutral	0.825206	-16	neutral	-2.223	-2.731	86.0524	0.45606	0.976908	14.3883	0.047886	1.76111	DNA-PKCS_A1441T
DNA-PKCS	2	missense	A1441V	DNA-PKCS	1441	1441	A	V	Non-Pathogenic	-0.35	80.361	-1.686	Neutral	0.825206	24	neutral	-2.223	-2.528	86.0524	0.458593	1.07851	14.2059	0.0473598	1.78901	DNA-PKCS_A1441V
DNA-PKCS	3	missense	A1441W	DNA-PKCS	1441	1441	A	W	Saturation-Mutagenesis	-0.197	80.361	-3.376	Deleterious	0.851675	10	neutral	-2.198	-2.781	86.0524	0.458593	1.07851	14.2059	0.0473598	1.78901	DNA-PKCS_A1441W
DNA-PKCS	3	missense	A1441Y	DNA-PKCS	1441	1441	A	Y	Saturation-Mutagenesis	-0.694	80.361	-2.679	Deleterious	0.825206	25	deleterious	-2.223	-4.262	86.0524	0.458593	1.07851	14.2059	0.0473598	1.78901	DNA-PKCS_A1441Y
DNA-PKCS	3	missense	A1449C	DNA-PKCS	1449	1449	A	C	Saturation-Mutagenesis	-0.658	77.3706	-1.384	Neutral	0.880131	38	deleterious	-1.563	-3.817	68.9094	0.395077	0.709458	10.2791	0.0420192	1.55166	DNA-PKCS_A1449C
DNA-PKCS	3	missense	A1449D	DNA-PKCS	1449	1449	A	D	Saturation-Mutagenesis	-0.743	77.3706	-1.284	Neutral	0.880131	38	neutral	-1.563	-2.382	68.9094	0.395077	0.709458	10.2791	0.0420192	1.55166	DNA-PKCS_A1449D
DNA-PKCS	3	missense	A1449E	DNA-PKCS	1449	1449	A	E	Saturation-Mutagenesis	-0.721	77.3706	-0.997	Neutral	0.880131	55	deleterious	-1.563	-3.928	68.9094	0.395077	0.709458	10.2791	0.0420192	1.55166	DNA-PKCS_A1449E
DNA-PKCS	3	missense	A1449F	DNA-PKCS	1449	1449	A	F	Saturation-Mutagenesis	-0.376	77.3706	-1.293	Neutral	0.880131	25	deleterious	-1.475	-3.729	68.9094	0.395077	0.709458	10.2791	0.0420192	1.55166	DNA-PKCS_A1449F
DNA-PKCS	3	missense	A1449G	DNA-PKCS	1449	1449	A	G	Saturation-Mutagenesis	-0.658	77.3706	-0.949	Neutral	0.880131	44	deleterious	-1.563	-4.045	68.9094	0.395077	0.709458	10.2791	0.0420192	1.55166	DNA-PKCS_A1449G
DNA-PKCS	3	missense	A1449H	DNA-PKCS	1449	1449	A	H	Saturation-Mutagenesis	-0.371	77.3706	-1.586	Neutral	0.880131	38	deleterious	-1.563	-4.059	68.9094	0.395077	0.709458	10.2791	0.0420192	1.55166	DNA-PKCS_A1449H
DNA-PKCS	3	missense	A1449I	DNA-PKCS	1449	1449	A	I	Saturation-Mutagenesis	-0.059	77.3706	-0.985	Neutral	0.880131	-4	deleterious	-1.475	-4.784	68.9094	0.395077	0.709458	10.2791	0.0420192	1.55166	DNA-PKCS_A1449I
DNA-PKCS	3	missense	A1449K	DNA-PKCS	1449	1449	A	K	Saturation-Mutagenesis	-0.49	77.3706	-0.899	Neutral	0.880131	21	deleterious	-1.563	-4.691	68.9094	0.395077	0.709458	10.2791	0.0420192	1.55166	DNA-PKCS_A1449K
DNA-PKCS	3	missense	A1449L	DNA-PKCS	1449	1449	A	L	Saturation-Mutagenesis	-0.114	77.3706	-0.825	Neutral	0.880131	9	deleterious	-1.475	-3.62	68.9094	0.395077	0.709458	10.2791	0.0420192	1.55166	DNA-PKCS_A1449L
DNA-PKCS	3	missense	A1449M	DNA-PKCS	1449	1449	A	M	Saturation-Mutagenesis	-1.651	77.3706	-0.717	Neutral	0.880131	44	deleterious	-1.475	-3.829	68.9094	0.395077	0.709458	10.2791	0.0420192	1.55166	DNA-PKCS_A1449M
DNA-PKCS	3	missense	A1449N	DNA-PKCS	1449	1449	A	N	Saturation-Mutagenesis	-0.568	77.3706	-0.764	Neutral	0.880131	13	neutral	-1.563	-2.412	68.9094	0.395077	0.709458	10.2791	0.0420192	1.55166	DNA-PKCS_A1449N
DNA-PKCS	2	missense	A1449P	DNA-PKCS	1449	1449	A	P	Non-Pathogenic	-0.354	77.3706	-1.614	Neutral	0.880131	49	deleterious	-1.475	-5.122	68.9094	0.395077	0.709458	10.2791	0.0420192	1.55166	DNA-PKCS_A1449P
DNA-PKCS	3	missense	A1449Q	DNA-PKCS	1449	1449	A	Q	Saturation-Mutagenesis	-0.568	77.3706	-0.932	Neutral	0.880131	27	deleterious	-1.563	-4.106	68.9094	0.395077	0.709458	10.2791	0.0420192	1.55166	DNA-PKCS_A1449Q
DNA-PKCS	3	missense	A1449R	DNA-PKCS	1449	1449	A	R	Saturation-Mutagenesis	-0.884	77.3706	-1.201	Neutral	0.880131	42	deleterious	-1.563	-3.781	68.9094	0.346821	0.59584	10.039	0.0395442	1.11259	DNA-PKCS_A1449R
DNA-PKCS	3	missense	A1449S	DNA-PKCS	1449	1449	A	S	Saturation-Mutagenesis	-0.307	77.3706	-0.058	Neutral	0.880131	35	deleterious	-1.563	-2.934	68.9094	0.395077	0.709458	10.2791	0.0420192	1.55166	DNA-PKCS_A1449S
DNA-PKCS	3	missense	A1449T	DNA-PKCS	1449	1449	A	T	Saturation-Mutagenesis	-0.348	77.3706	-0.676	Neutral	0.880131	21	deleterious	-1.563	-2.302	68.9094	0.395077	0.709458	10.2791	0.0420192	1.55166	DNA-PKCS_A1449T
DNA-PKCS	3	missense	A1449V	DNA-PKCS	1449	1449	A	V	Saturation-Mutagenesis	-0.056	77.3706	-0.789	Neutral	0.880131	4	deleterious	-1.475	-3.906	68.9094	0.395077	0.709458	10.2791	0.0420192	1.55166	DNA-PKCS_A1449V
DNA-PKCS	3	missense	A1449W	DNA-PKCS	1449	1449	A	W	Saturation-Mutagenesis	-0.927	77.3706	-2.358	Neutral	0.880131	64	deleterious	-1.475	-3.43	68.9094	0.395077	0.709458	10.2791	0.0420192	1.55166	DNA-PKCS_A1449W
DNA-PKCS	3	missense	A1449Y	DNA-PKCS	1449	1449	A	Y	Saturation-Mutagenesis	-1.249	77.3706	-1.475	Neutral	0.880131	45	deleterious	-1.475	-3.45	68.9094	0.395077	0.709458	10.2791	0.0420192	1.55166	DNA-PKCS_A1449Y
DNA-PKCS	3	missense	A1450C	DNA-PKCS	1450	1450	A	C	Saturation-Mutagenesis	-0.776	80.259	-1.53	Neutral	0.880131	17	deleterious	-1.475	-3.763	72.1433	0.32765	0.829988	10.4132	0.0358848	1.45282	DNA-PKCS_A1450C
DNA-PKCS	3	missense	A1450D	DNA-PKCS	1450	1450	A	D	Saturation-Mutagenesis	-0.86	80.259	-1.347	Neutral	0.880131	43	deleterious	-1.475	-2.338	72.1433	0.32765	0.829988	10.4132	0.0358848	1.45282	DNA-PKCS_A1450D
DNA-PKCS	3	missense	A1450E	DNA-PKCS	1450	1450	A	E	Saturation-Mutagenesis	-0.851	80.259	-0.731	Neutral	0.880131	55	deleterious	-1.475	-2.497	72.1433	0.32765	0.829988	10.4132	0.0358848	1.45282	DNA-PKCS_A1450E
DNA-PKCS	3	missense	A1450F	DNA-PKCS	1450	1450	A	F	Saturation-Mutagenesis	-0.32	80.259	-1.578	Neutral	0.880131	-25	neutral	-2.127	-3.409	72.1433	0.32765	0.829988	10.4132	0.0358848	1.45282	DNA-PKCS_A1450F
DNA-PKCS	3	missense	A1450G	DNA-PKCS	1450	1450	A	G	Saturation-Mutagenesis	-0.776	80.259	-0.981	Neutral	0.880131	31	deleterious	-1.475	-4.025	72.1433	0.32765	0.829988	10.4132	0.0358848	1.45282	DNA-PKCS_A1450G
DNA-PKCS	3	missense	A1450H	DNA-PKCS	1450	1450	A	H	Saturation-Mutagenesis	-0.458	80.259	-0.662	Neutral	0.880131	37	deleterious	-1.475	-4.021	72.1433	0.32765	0.829988	10.4132	0.0358848	1.45282	DNA-PKCS_A1450H
DNA-PKCS	3	missense	A1450I	DNA-PKCS	1450	1450	A	I	Saturation-Mutagenesis	-0.191	80.259	-1.661	Neutral	0.880131	53	neutral	-2.127	-3.166	72.1433	0.32765	0.829988	10.4132	0.0358848	1.45282	DNA-PKCS_A1450I
DNA-PKCS	3	missense	A1450K	DNA-PKCS	1450	1450	A	K	Saturation-Mutagenesis	-0.59	80.259	-0.631	Neutral	0.880131	27	deleterious	-1.475	-4.725	72.1433	0.32765	0.829988	10.4132	0.0358848	1.45282	DNA-PKCS_A1450K
DNA-PKCS	3	missense	A1450L	DNA-PKCS	1450	1450	A	L	Saturation-Mutagenesis	-0.258	80.259	-1.495	Neutral	0.880131	70	neutral	-2.127	-1.591	72.1433	0.32765	0.829988	10.4132	0.0358848	1.45282	DNA-PKCS_A1450L
DNA-PKCS	3	missense	A1450M	DNA-PKCS	1450	1450	A	M	Saturation-Mutagenesis	-1.529	80.259	-0.879	Neutral	0.880131	-21	neutral	-2.127	-3.232	72.1433	0.32765	0.829988	10.4132	0.0358848	1.45282	DNA-PKCS_A1450M
DNA-PKCS	3	missense	A1450N	DNA-PKCS	1450	1450	A	N	Saturation-Mutagenesis	-0.676	80.259	-0.532	Neutral	0.880131	22	deleterious	-1.475	-2.378	72.1433	0.32765	0.829988	10.4132	0.0358848	1.45282	DNA-PKCS_A1450N
DNA-PKCS	3	missense	A1450P	DNA-PKCS	1450	1450	A	P	Saturation-Mutagenesis	-0.469	80.259	-1.646	Neutral	0.880131	34	neutral	-2.127	-3.526	72.1433	0.32765	0.829988	10.4132	0.0358848	1.45282	DNA-PKCS_A1450P
DNA-PKCS	3	missense	A1450Q	DNA-PKCS	1450	1450	A	Q	Saturation-Mutagenesis	-0.676	80.259	-0.231	Neutral	0.880131	5	deleterious	-1.475	-2.728	72.1433	0.32765	0.829988	10.4132	0.0358848	1.45282	DNA-PKCS_A1450Q
DNA-PKCS	3	missense	A1450R	DNA-PKCS	1450	1450	A	R	Saturation-Mutagenesis	-1.076	80.259	-0.813	Neutral	0.880131	44	deleterious	-1.475	-3.915	72.1433	0.395077	0.709458	10.2791	0.0420192	1.55166	DNA-PKCS_A1450R
DNA-PKCS	3	missense	A1450S	DNA-PKCS	1450	1450	A	S	Saturation-Mutagenesis	-0.426	80.259	0.597	Neutral	0.880131	57	deleterious	-1.475	-3.023	72.1433	0.32765	0.829988	10.4132	0.0358848	1.45282	DNA-PKCS_A1450S
DNA-PKCS	3	missense	A1450T	DNA-PKCS	1450	1450	A	T	Saturation-Mutagenesis	-0.425	80.259	-0.499	Neutral	0.880131	54	deleterious	-1.475	-2.909	72.1433	0.32765	0.829988	10.4132	0.0358848	1.45282	DNA-PKCS_A1450T
DNA-PKCS	3	missense	A1450V	DNA-PKCS	1450	1450	A	V	Saturation-Mutagenesis	-0.187	80.259	-1.412	Neutral	0.880131	36	deleterious	-2.127	-4.447	72.1433	0.32765	0.829988	10.4132	0.0358848	1.45282	DNA-PKCS_A1450V
DNA-PKCS	3	missense	A1450W	DNA-PKCS	1450	1450	A	W	Saturation-Mutagenesis	-0.882	80.259	-2.443	Neutral	0.850794	-8	neutral	-2.127	-3.521	72.1433	0.32765	0.829988	10.4132	0.0358848	1.45282	DNA-PKCS_A1450W
DNA-PKCS	3	missense	A1450Y	DNA-PKCS	1450	1450	A	Y	Saturation-Mutagenesis	-1.227	80.259	-1.378	Neutral	0.880131	-32	neutral	-2.127	-3.561	72.1433	0.32765	0.829988	10.4132	0.0358848	1.45282	DNA-PKCS_A1450Y
DNA-PKCS	3	missense	A1454C	DNA-PKCS	1454	1454	A	C	Saturation-Mutagenesis	-0.916	80.3239	-2.427	Neutral	0.884906	14	deleterious	-2.274	-4.622	75.4201	0.538674	1.2024	11.342	0.043798	1.71346	DNA-PKCS_A1454C
DNA-PKCS	3	missense	A1454D	DNA-PKCS	1454	1454	A	D	Saturation-Mutagenesis	-1.164	80.3239	-2.624	Deleterious	0.884906	-15	neutral	-1.95	-2.015	75.4201	0.538674	1.2024	11.342	0.043798	1.71346	DNA-PKCS_A1454D
DNA-PKCS	3	missense	A1454E	DNA-PKCS	1454	1454	A	E	Saturation-Mutagenesis	-1.179	80.3239	-2.492	Neutral	0.884906	22	neutral	-1.95	-2.104	75.4201	0.538674	1.2024	11.342	0.043798	1.71346	DNA-PKCS_A1454E
DNA-PKCS	3	missense	A1454F	DNA-PKCS	1454	1454	A	F	Saturation-Mutagenesis	-0.287	80.3239	-3.157	Deleterious	0.884906	-20	neutral	-2.274	-2.778	75.4201	0.538674	1.2024	11.342	0.043798	1.71346	DNA-PKCS_A1454F
DNA-PKCS	3	missense	A1454G	DNA-PKCS	1454	1454	A	G	Saturation-Mutagenesis	-0.916	80.3239	-0.16	Neutral	0.884906	15	neutral	-2.274	-3.615	75.4201	0.538674	1.2024	11.342	0.043798	1.71346	DNA-PKCS_A1454G
DNA-PKCS	3	missense	A1454H	DNA-PKCS	1454	1454	A	H	Saturation-Mutagenesis	-0.731	80.3239	-2.79	Deleterious	0.884906	-33	deleterious	-1.95	-4.042	75.4201	0.538674	1.2024	11.342	0.043798	1.71346	DNA-PKCS_A1454H
DNA-PKCS	3	missense	A1454I	DNA-PKCS	1454	1454	A	I	Saturation-Mutagenesis	-0.463	80.3239	-2.659	Deleterious	0.884906	4	neutral	-2.274	-3.493	75.4201	0.538674	1.2024	11.342	0.043798	1.71346	DNA-PKCS_A1454I
DNA-PKCS	3	missense	A1454K	DNA-PKCS	1454	1454	A	K	Saturation-Mutagenesis	-0.889	80.3239	-2.259	Neutral	0.884906	-37	neutral	-1.95	-3.082	75.4201	0.538674	1.2024	11.342	0.043798	1.71346	DNA-PKCS_A1454K
DNA-PKCS	3	missense	A1454L	DNA-PKCS	1454	1454	A	L	Saturation-Mutagenesis	-0.576	80.3239	-2.559	Deleterious	0.884906	45	neutral	-2.274	-3.522	75.4201	0.538674	1.2024	11.342	0.043798	1.71346	DNA-PKCS_A1454L
DNA-PKCS	3	missense	A1454M	DNA-PKCS	1454	1454	A	M	Saturation-Mutagenesis	-1.579	80.3239	-2.359	Neutral	0.884906	7	deleterious	-2.274	-3.978	75.4201	0.538674	1.2024	11.342	0.043798	1.71346	DNA-PKCS_A1454M
DNA-PKCS	3	missense	A1454N	DNA-PKCS	1454	1454	A	N	Saturation-Mutagenesis	-0.789	80.3239	-2.39	Neutral	0.884906	24	neutral	-1.95	-3.791	75.4201	0.538674	1.2024	11.342	0.043798	1.71346	DNA-PKCS_A1454N
DNA-PKCS	3	missense	A1454P	DNA-PKCS	1454	1454	A	P	Saturation-Mutagenesis	-0.64	80.3239	-2.692	Deleterious	0.884906	17	deleterious	-2.274	-3.71	75.4201	0.538674	1.2024	11.342	0.043798	1.71346	DNA-PKCS_A1454P
DNA-PKCS	3	missense	A1454Q	DNA-PKCS	1454	1454	A	Q	Saturation-Mutagenesis	-0.789	80.3239	-2.359	Neutral	0.884906	17	neutral	-2.274	-3.907	75.4201	0.538674	1.2024	11.342	0.043798	1.71346	DNA-PKCS_A1454Q
DNA-PKCS	3	missense	A1454R	DNA-PKCS	1454	1454	A	R	Saturation-Mutagenesis	-1.433	80.3239	-2.292	Neutral	0.884906	-30	neutral	-1.95	-3.573	75.4201	0.538674	1.2024	11.342	0.043798	1.71346	DNA-PKCS_A1454R
DNA-PKCS	1	missense	A1454S	DNA-PKCS	1454	1454	A	S	Pathogenic	-0.748	80.3239	-0.862	Neutral	0.884906	11	deleterious	-1.95	-4.148	75.4201	0.538674	1.2024	11.342	0.043798	1.71346	DNA-PKCS_A1454S
DNA-PKCS	3	missense	A1454T	DNA-PKCS	1454	1454	A	T	Saturation-Mutagenesis	-0.46	80.3239	-1.927	Neutral	0.884906	15	neutral	-1.95	-2.711	75.4201	0.538674	1.2024	11.342	0.043798	1.71346	DNA-PKCS_A1454T
DNA-PKCS	3	missense	A1454V	DNA-PKCS	1454	1454	A	V	Saturation-Mutagenesis	-0.426	80.3239	-2.127	Neutral	0.884906	21	neutral	-2.274	-2.613	75.4201	0.538674	1.2024	11.342	0.043798	1.71346	DNA-PKCS_A1454V
DNA-PKCS	3	missense	A1454W	DNA-PKCS	1454	1454	A	W	Saturation-Mutagenesis	-1.14	80.3239	-3.622	Deleterious	0.884906	44	deleterious	-2.274	-4.078	75.4201	0.538674	1.2024	11.342	0.043798	1.71346	DNA-PKCS_A1454W
DNA-PKCS	3	missense	A1454Y	DNA-PKCS	1454	1454	A	Y	Saturation-Mutagenesis	-1.599	80.3239	-3.057	Deleterious	0.884906	1	neutral	-2.274	-3.575	75.4201	0.538674	1.2024	11.342	0.043798	1.71346	DNA-PKCS_A1454Y
DNA-PKCS	3	missense	A1461C	DNA-PKCS	1461	1461	A	C	Saturation-Mutagenesis	-0.813	82.552	-1.894	Neutral	0.91063	-46	deleterious	-2.035	-3.966	80.973	0.333931	0.733901	11.1784	0.0388694	1.0482	DNA-PKCS_A1461C
DNA-PKCS	3	missense	A1461D	DNA-PKCS	1461	1461	A	D	Saturation-Mutagenesis	-0.769	82.552	-3.057	Deleterious	0.91063	-59	deleterious	-2.035	-3.601	80.973	0.333931	0.733901	11.1784	0.0388694	1.0482	DNA-PKCS_A1461D
DNA-PKCS	3	missense	A1461E	DNA-PKCS	1461	1461	A	E	Saturation-Mutagenesis	-0.773	82.552	-2.492	Neutral	0.91063	-56	deleterious	-2.035	-3.932	80.973	0.333931	0.733901	11.1784	0.0388694	1.0482	DNA-PKCS_A1461E
DNA-PKCS	3	missense	A1461F	DNA-PKCS	1461	1461	A	F	Saturation-Mutagenesis	0.481	82.552	-2.224	Neutral	0.91063	-21	neutral	-2.035	-2.713	80.973	0.333931	0.733901	11.1784	0.0388694	1.0482	DNA-PKCS_A1461F
DNA-PKCS	3	missense	A1461G	DNA-PKCS	1461	1461	A	G	Saturation-Mutagenesis	-0.813	82.552	-2.094	Neutral	0.91063	-32	deleterious	-2.035	-4.674	80.973	0.333931	0.733901	11.1784	0.0388694	1.0482	DNA-PKCS_A1461G
DNA-PKCS	3	missense	A1461H	DNA-PKCS	1461	1461	A	H	Saturation-Mutagenesis	-0.464	82.552	-2.69	Deleterious	0.91063	-79	deleterious	-2.035	-3.85	80.973	0.333931	0.733901	11.1784	0.0388694	1.0482	DNA-PKCS_A1461H
DNA-PKCS	3	missense	A1461I	DNA-PKCS	1461	1461	A	I	Saturation-Mutagenesis	-0.257	82.552	-2.059	Neutral	0.91063	-21	neutral	-2.035	-3.04	80.973	0.333931	0.733901	11.1784	0.0388694	1.0482	DNA-PKCS_A1461I
DNA-PKCS	3	missense	A1461K	DNA-PKCS	1461	1461	A	K	Saturation-Mutagenesis	-0.589	82.552	-2.392	Neutral	0.91063	-75	neutral	-2.035	-2.772	80.973	0.333931	0.733901	11.1784	0.0388694	1.0482	DNA-PKCS_A1461K
DNA-PKCS	3	missense	A1461L	DNA-PKCS	1461	1461	A	L	Saturation-Mutagenesis	-0.281	82.552	-2.259	Neutral	0.91063	45	neutral	-2.035	-2.942	80.973	0.333931	0.733901	11.1784	0.0388694	1.0482	DNA-PKCS_A1461L
DNA-PKCS	3	missense	A1461M	DNA-PKCS	1461	1461	A	M	Saturation-Mutagenesis	-0.41	82.552	-2.059	Neutral	0.91063	-6	neutral	-2.035	-1.323	80.973	0.333931	0.733901	11.1784	0.0388694	1.0482	DNA-PKCS_A1461M
DNA-PKCS	3	missense	A1461N	DNA-PKCS	1461	1461	A	N	Saturation-Mutagenesis	-0.744	82.552	-2.59	Deleterious	0.91063	-41	neutral	-2.035	-3.383	80.973	0.333931	0.733901	11.1784	0.0388694	1.0482	DNA-PKCS_A1461N
DNA-PKCS	3	missense	A1461P	DNA-PKCS	1461	1461	A	P	Saturation-Mutagenesis	-0.606	82.552	-2.825	Deleterious	0.91063	-42	neutral	-2.035	-3.642	80.973	0.333931	0.733901	11.1784	0.0388694	1.0482	DNA-PKCS_A1461P
DNA-PKCS	3	missense	A1461Q	DNA-PKCS	1461	1461	A	Q	Saturation-Mutagenesis	-0.744	82.552	-2.425	Neutral	0.91063	-48	deleterious	-2.035	-3.898	80.973	0.333931	0.733901	11.1784	0.0388694	1.0482	DNA-PKCS_A1461Q
DNA-PKCS	3	missense	A1461R	DNA-PKCS	1461	1461	A	R	Saturation-Mutagenesis	-0.666	82.552	-2.625	Deleterious	0.91063	-42	neutral	-2.413	-4.16	80.973	0.27757	0.677358	10.2262	0.0358474	0.864434	DNA-PKCS_A1461R
DNA-PKCS	3	missense	A1461S	DNA-PKCS	1461	1461	A	S	Saturation-Mutagenesis	-0.58	82.552	-1.095	Neutral	0.91063	-45	deleterious	-2.035	-3.678	80.973	0.333931	0.733901	11.1784	0.0388694	1.0482	DNA-PKCS_A1461S
DNA-PKCS	3	missense	A1461T	DNA-PKCS	1461	1461	A	T	Saturation-Mutagenesis	-0.554	82.552	-1.66	Neutral	0.91063	-67	deleterious	-2.035	-3.53	80.973	0.333931	0.733901	11.1784	0.0388694	1.0482	DNA-PKCS_A1461T
DNA-PKCS	3	missense	A1461V	DNA-PKCS	1461	1461	A	V	Saturation-Mutagenesis	-0.27	82.552	-1.627	Neutral	0.91063	-3	deleterious	-2.035	-3.976	80.973	0.333931	0.733901	11.1784	0.0388694	1.0482	DNA-PKCS_A1461V
DNA-PKCS	3	missense	A1461W	DNA-PKCS	1461	1461	A	W	Saturation-Mutagenesis	-0.229	82.552	-3.389	Deleterious	0.91063	17	deleterious	-2.035	-3.799	80.973	0.333931	0.733901	11.1784	0.0388694	1.0482	DNA-PKCS_A1461W
DNA-PKCS	3	missense	A1461Y	DNA-PKCS	1461	1461	A	Y	Saturation-Mutagenesis	-0.446	82.552	-2.024	Neutral	0.91063	-23	neutral	-2.035	-3.674	80.973	0.333931	0.733901	11.1784	0.0388694	1.0482	DNA-PKCS_A1461Y
DNA-PKCS	3	missense	A1492C	DNA-PKCS	1492	1492	A	C	Saturation-Mutagenesis	-0.644	74.4206	-1.596	Neutral	0.947666	-35	deleterious	-1.593	-3.138	92.6105	0.51174	0.794189	10.3395	0.042628	1.31141	DNA-PKCS_A1492C
DNA-PKCS	2	missense	A1492D	DNA-PKCS	1492	1492	A	D	Non-Pathogenic	-0.613	74.4206	-2.52	Deleterious	0.947666	-51	neutral	-2.169	-1.468	92.6105	0.51174	0.794189	10.3395	0.042628	1.31141	DNA-PKCS_A1492D
DNA-PKCS	3	missense	A1492E	DNA-PKCS	1492	1492	A	E	Saturation-Mutagenesis	-0.575	74.4206	-1.675	Neutral	0.947666	-45	neutral	-2.169	-3.746	92.6105	0.51174	0.794189	10.3395	0.042628	1.31141	DNA-PKCS_A1492E
DNA-PKCS	3	missense	A1492F	DNA-PKCS	1492	1492	A	F	Saturation-Mutagenesis	0.029	74.4206	-2.026	Neutral	0.947666	11	deleterious	-1.593	-3.745	92.6105	0.51174	0.794189	10.3395	0.042628	1.31141	DNA-PKCS_A1492F
DNA-PKCS	3	missense	A1492G	DNA-PKCS	1492	1492	A	G	Saturation-Mutagenesis	-0.644	74.4206	-2.121	Neutral	0.947666	-14	deleterious	-1.593	-3.18	92.6105	0.51174	0.794189	10.3395	0.042628	1.31141	DNA-PKCS_A1492G
DNA-PKCS	3	missense	A1492H	DNA-PKCS	1492	1492	A	H	Saturation-Mutagenesis	-0.406	74.4206	-2.296	Neutral	0.947666	-76	neutral	-2.169	-3	92.6105	0.51174	0.794189	10.3395	0.042628	1.31141	DNA-PKCS_A1492H
DNA-PKCS	3	missense	A1492I	DNA-PKCS	1492	1492	A	I	Saturation-Mutagenesis	-0.042	74.4206	-1.759	Neutral	0.947666	-5	deleterious	-1.593	-3.637	92.6105	0.51174	0.794189	10.3395	0.042628	1.31141	DNA-PKCS_A1492I
DNA-PKCS	3	missense	A1492K	DNA-PKCS	1492	1492	A	K	Saturation-Mutagenesis	-0.485	74.4206	-1.975	Neutral	0.947666	-73	neutral	-2.169	-3.149	92.6105	0.51174	0.794189	10.3395	0.042628	1.31141	DNA-PKCS_A1492K
DNA-PKCS	3	missense	A1492L	DNA-PKCS	1492	1492	A	L	Saturation-Mutagenesis	-0.079	74.4206	-1.94	Neutral	0.947666	61	deleterious	-1.593	-4.88	92.6105	0.51174	0.794189	10.3395	0.042628	1.31141	DNA-PKCS_A1492L
DNA-PKCS	3	missense	A1492M	DNA-PKCS	1492	1492	A	M	Saturation-Mutagenesis	-1.052	74.4206	-1.697	Neutral	0.947666	35	deleterious	-1.593	-3.24	92.6105	0.51174	0.794189	10.3395	0.042628	1.31141	DNA-PKCS_A1492M
DNA-PKCS	3	missense	A1492N	DNA-PKCS	1492	1492	A	N	Saturation-Mutagenesis	-0.611	74.4206	-2.477	Neutral	0.947666	-29	deleterious	-1.593	-4.456	92.6105	0.51174	0.794189	10.3395	0.042628	1.31141	DNA-PKCS_A1492N
DNA-PKCS	3	missense	A1492P	DNA-PKCS	1492	1492	A	P	Saturation-Mutagenesis	-0.259	74.4206	-2.475	Neutral	0.947666	-31	deleterious	-1.593	-3.393	92.6105	0.51174	0.794189	10.3395	0.042628	1.31141	DNA-PKCS_A1492P
DNA-PKCS	3	missense	A1492Q	DNA-PKCS	1492	1492	A	Q	Saturation-Mutagenesis	-0.611	74.4206	-1.775	Neutral	0.947666	-38	neutral	-1.593	-2.452	92.6105	0.51174	0.794189	10.3395	0.042628	1.31141	DNA-PKCS_A1492Q
DNA-PKCS	3	missense	A1492R	DNA-PKCS	1492	1492	A	R	Saturation-Mutagenesis	-0.609	74.4206	-2.215	Neutral	0.947666	-31	neutral	-2.169	-3.087	92.6105	0.282536	0.612488	9.94519	0.0370852	0.612107	DNA-PKCS_A1492R
DNA-PKCS	3	missense	A1492S	DNA-PKCS	1492	1492	A	S	Saturation-Mutagenesis	-0.339	74.4206	-1.092	Neutral	0.947666	-41	deleterious	-2.169	-3.946	92.6105	0.51174	0.794189	10.3395	0.042628	1.31141	DNA-PKCS_A1492S
DNA-PKCS	3	missense	A1492T	DNA-PKCS	1492	1492	A	T	Saturation-Mutagenesis	-0.524	74.4206	-1.479	Neutral	0.947666	-63	neutral	-1.593	-2.472	92.6105	0.51174	0.794189	10.3395	0.042628	1.31141	DNA-PKCS_A1492T
DNA-PKCS	3	missense	A1492V	DNA-PKCS	1492	1492	A	V	Saturation-Mutagenesis	-0.052	74.4206	-1.394	Neutral	0.947666	15	deleterious	-1.593	-3.551	92.6105	0.51174	0.794189	10.3395	0.042628	1.31141	DNA-PKCS_A1492V
DNA-PKCS	3	missense	A1492W	DNA-PKCS	1492	1492	A	W	Saturation-Mutagenesis	-0.767	74.4206	-3.078	Deleterious	0.974275	61	deleterious	-1.593	-3.435	92.6105	0.51174	0.794189	10.3395	0.042628	1.31141	DNA-PKCS_A1492W
DNA-PKCS	3	missense	A1492Y	DNA-PKCS	1492	1492	A	Y	Saturation-Mutagenesis	-0.958	74.4206	-2.226	Neutral	0.947666	28	neutral	-1.593	-2.065	92.6105	0.51174	0.794189	10.3395	0.042628	1.31141	DNA-PKCS_A1492Y
DNA-PKCS	3	missense	A1511C	DNA-PKCS	1511	1511	A	C	Saturation-Mutagenesis	-1.113	80.4863	-2.36	Neutral	1.02282	30	deleterious	-1.741	-3.42	88.5837	0.426843	1.23882	14.4379	0.0499236	1.48153	DNA-PKCS_A1511C
DNA-PKCS	3	missense	A1511D	DNA-PKCS	1511	1511	A	D	Saturation-Mutagenesis	-1.077	80.4863	-3.49	Deleterious	1.02282	6	neutral	-1.916	-3.817	88.5837	0.426843	1.23882	14.4379	0.0499236	1.48153	DNA-PKCS_A1511D
DNA-PKCS	3	missense	A1511E	DNA-PKCS	1511	1511	A	E	Saturation-Mutagenesis	-1.091	80.4863	-2.825	Deleterious	1.02282	40	deleterious	-1.916	-4.032	88.5837	0.426843	1.23882	14.4379	0.0499236	1.48153	DNA-PKCS_A1511E
DNA-PKCS	3	missense	A1511F	DNA-PKCS	1511	1511	A	F	Saturation-Mutagenesis	0.696	80.4863	-2.89	Deleterious	1.02282	-23	neutral	-1.741	-2.889	88.5837	0.426843	1.23882	14.4379	0.0499236	1.48153	DNA-PKCS_A1511F
DNA-PKCS	3	missense	A1511G	DNA-PKCS	1511	1511	A	G	Saturation-Mutagenesis	-1.113	80.4863	-2.127	Neutral	1.02282	38	neutral	-1.741	-2.139	88.5837	0.426843	1.23882	14.4379	0.0499236	1.48153	DNA-PKCS_A1511G
DNA-PKCS	3	missense	A1511H	DNA-PKCS	1511	1511	A	H	Saturation-Mutagenesis	-0.834	80.4863	-3.257	Deleterious	1.02282	-9	neutral	-1.916	-1.902	88.5837	0.426843	1.23882	14.4379	0.0499236	1.48153	DNA-PKCS_A1511H
DNA-PKCS	3	missense	A1511I	DNA-PKCS	1511	1511	A	I	Saturation-Mutagenesis	-0.347	80.4863	-2.525	Deleterious	1.02282	41	deleterious	-1.741	-4.73	88.5837	0.426843	1.23882	14.4379	0.0499236	1.48153	DNA-PKCS_A1511I
DNA-PKCS	3	missense	A1511K	DNA-PKCS	1511	1511	A	K	Saturation-Mutagenesis	-0.961	80.4863	-2.925	Deleterious	1.02282	-8	neutral	-1.916	-2.901	88.5837	0.426843	1.23882	14.4379	0.0499236	1.48153	DNA-PKCS_A1511K
DNA-PKCS	3	missense	A1511L	DNA-PKCS	1511	1511	A	L	Saturation-Mutagenesis	-0.282	80.4863	-2.592	Deleterious	1.02282	73	deleterious	-1.741	-3.309	88.5837	0.426843	1.23882	14.4379	0.0499236	1.48153	DNA-PKCS_A1511L
DNA-PKCS	3	missense	A1511M	DNA-PKCS	1511	1511	A	M	Saturation-Mutagenesis	0.286	80.4863	-2.559	Deleterious	1.02282	-25	neutral	-1.741	-2.477	88.5837	0.426843	1.23882	14.4379	0.0499236	1.48153	DNA-PKCS_A1511M
DNA-PKCS	3	missense	A1511N	DNA-PKCS	1511	1511	A	N	Saturation-Mutagenesis	-1.044	80.4863	-3.524	Deleterious	1.02282	33	deleterious	-1.741	-3.319	88.5837	0.426843	1.23882	14.4379	0.0499236	1.48153	DNA-PKCS_A1511N
DNA-PKCS	3	missense	A1511P	DNA-PKCS	1511	1511	A	P	Saturation-Mutagenesis	-0.852	80.4863	-3.092	Deleterious	1.02282	39	deleterious	-1.741	-3.541	88.5837	0.426843	1.23882	14.4379	0.0499236	1.48153	DNA-PKCS_A1511P
DNA-PKCS	3	missense	A1511Q	DNA-PKCS	1511	1511	A	Q	Saturation-Mutagenesis	-1.044	80.4863	-2.859	Deleterious	1.02282	36	deleterious	-1.741	-3.538	88.5837	0.426843	1.23882	14.4379	0.0499236	1.48153	DNA-PKCS_A1511Q
DNA-PKCS	3	missense	A1511R	DNA-PKCS	1511	1511	A	R	Saturation-Mutagenesis	-0.935	80.4863	-2.892	Deleterious	1.02282	9	neutral	-1.916	-1.817	88.5837	0.44012	0.823183	13.1768	0.0515635	1.36865	DNA-PKCS_A1511R
DNA-PKCS	3	missense	A1511S	DNA-PKCS	1511	1511	A	S	Saturation-Mutagenesis	-0.849	80.4863	-1.595	Neutral	1.02282	35	neutral	-1.741	-2.585	88.5837	0.426843	1.23882	14.4379	0.0499236	1.48153	DNA-PKCS_A1511S
DNA-PKCS	3	missense	A1511T	DNA-PKCS	1511	1511	A	T	Saturation-Mutagenesis	-0.854	80.4863	-2.327	Neutral	1.02282	42	deleterious	-1.741	-4.589	88.5837	0.426843	1.23882	14.4379	0.0499236	1.48153	DNA-PKCS_A1511T
DNA-PKCS	3	missense	A1511V	DNA-PKCS	1511	1511	A	V	Saturation-Mutagenesis	-0.347	80.4863	-2.06	Neutral	1.02282	51	deleterious	-1.741	-3.809	88.5837	0.426843	1.23882	14.4379	0.0499236	1.48153	DNA-PKCS_A1511V
DNA-PKCS	3	missense	A1511W	DNA-PKCS	1511	1511	A	W	Saturation-Mutagenesis	-0.052	80.4863	-3.922	Deleterious	1.02282	-14	deleterious	-1.741	-3.498	88.5837	0.426843	1.23882	14.4379	0.0499236	1.48153	DNA-PKCS_A1511W
DNA-PKCS	3	missense	A1511Y	DNA-PKCS	1511	1511	A	Y	Saturation-Mutagenesis	0.193	80.4863	-3.157	Deleterious	1.02282	-37	deleterious	-1.741	-3.216	88.5837	0.426843	1.23882	14.4379	0.0499236	1.48153	DNA-PKCS_A1511Y
DNA-PKCS	3	missense	A1518C	DNA-PKCS	1518	1518	A	C	Saturation-Mutagenesis	-0.645	78.8701	-2.66	Deleterious	0.980388	0	deleterious	-1.328	-3.64	97.4899	0.493554	1.29615	18.044	0.0608298	1.6592	DNA-PKCS_A1518C
DNA-PKCS	3	missense	A1518D	DNA-PKCS	1518	1518	A	D	Saturation-Mutagenesis	-0.62	78.8701	-3.724	Deleterious	0.980388	45	deleterious	-1.328	-3.625	97.4899	0.493554	1.29615	18.044	0.0608298	1.6592	DNA-PKCS_A1518D
DNA-PKCS	3	missense	A1518E	DNA-PKCS	1518	1518	A	E	Saturation-Mutagenesis	-0.59	78.8701	-3.192	Deleterious	0.980388	14	deleterious	-1.328	-3.522	97.4899	0.493554	1.29615	18.044	0.0608298	1.6592	DNA-PKCS_A1518E
DNA-PKCS	3	missense	A1518F	DNA-PKCS	1518	1518	A	F	Saturation-Mutagenesis	0.046	78.8701	-3.99	Deleterious	0.980388	-39	deleterious	-1.328	-3.783	97.4899	0.493554	1.29615	18.044	0.0608298	1.6592	DNA-PKCS_A1518F
DNA-PKCS	2	missense	A1518G	DNA-PKCS	1518	1518	A	G	Non-Pathogenic	-0.645	78.8701	-2.527	Deleterious	0.980388	-19	deleterious	-1.328	-4.042	97.4899	0.493554	1.29615	18.044	0.0608298	1.6592	DNA-PKCS_A1518G
DNA-PKCS	3	missense	A1518H	DNA-PKCS	1518	1518	A	H	Saturation-Mutagenesis	-0.279	78.8701	-4.057	Deleterious	0.980388	37	deleterious	-1.328	-3.703	97.4899	0.493554	1.29615	18.044	0.0608298	1.6592	DNA-PKCS_A1518H
DNA-PKCS	3	missense	A1518I	DNA-PKCS	1518	1518	A	I	Saturation-Mutagenesis	0.142	78.8701	-3.025	Deleterious	0.980388	-36	neutral	-1.328	-2.116	97.4899	0.493554	1.29615	18.044	0.0608298	1.6592	DNA-PKCS_A1518I
DNA-PKCS	3	missense	A1518K	DNA-PKCS	1518	1518	A	K	Saturation-Mutagenesis	-0.372	78.8701	-3.292	Deleterious	0.980388	27	deleterious	-1.328	-2.529	97.4899	0.493554	1.29615	18.044	0.0608298	1.6592	DNA-PKCS_A1518K
DNA-PKCS	3	missense	A1518L	DNA-PKCS	1518	1518	A	L	Saturation-Mutagenesis	0.145	78.8701	-3.092	Deleterious	0.980388	7	deleterious	-1.328	-3.994	97.4899	0.493554	1.29615	18.044	0.0608298	1.6592	DNA-PKCS_A1518L
DNA-PKCS	3	missense	A1518M	DNA-PKCS	1518	1518	A	M	Saturation-Mutagenesis	-1.405	78.8701	-3.125	Deleterious	0.980388	-2	neutral	-1.328	-2.53	97.4899	0.493554	1.29615	18.044	0.0608298	1.6592	DNA-PKCS_A1518M
DNA-PKCS	3	missense	A1518N	DNA-PKCS	1518	1518	A	N	Saturation-Mutagenesis	-0.591	78.8701	-3.757	Deleterious	0.980388	62	deleterious	-1.328	-4.101	97.4899	0.493554	1.29615	18.044	0.0608298	1.6592	DNA-PKCS_A1518N
DNA-PKCS	3	missense	A1518P	DNA-PKCS	1518	1518	A	P	Saturation-Mutagenesis	-0.34	78.8701	-3.359	Deleterious	0.980388	-12	deleterious	-1.328	-3.12	97.4899	0.493554	1.29615	18.044	0.0608298	1.6592	DNA-PKCS_A1518P
DNA-PKCS	3	missense	A1518Q	DNA-PKCS	1518	1518	A	Q	Saturation-Mutagenesis	-0.591	78.8701	-3.259	Deleterious	0.980388	40	deleterious	-1.328	-4.704	97.4899	0.493554	1.29615	18.044	0.0608298	1.6592	DNA-PKCS_A1518Q
DNA-PKCS	3	missense	A1518R	DNA-PKCS	1518	1518	A	R	Saturation-Mutagenesis	-0.825	78.8701	-3.459	Deleterious	0.980388	34	deleterious	-1.328	-4.746	97.4899	0.493554	1.29615	18.044	0.0608298	1.6592	DNA-PKCS_A1518R
DNA-PKCS	3	missense	A1518S	DNA-PKCS	1518	1518	A	S	Saturation-Mutagenesis	-0.213	78.8701	-1.695	Neutral	0.980388	0	deleterious	-1.328	-3.435	97.4899	0.493554	1.29615	18.044	0.0608298	1.6592	DNA-PKCS_A1518S
DNA-PKCS	3	missense	A1518T	DNA-PKCS	1518	1518	A	T	Saturation-Mutagenesis	-0.472	78.8701	-2.427	Neutral	0.980388	68	deleterious	-1.328	-3.927	97.4899	0.493554	1.29615	18.044	0.0608298	1.6592	DNA-PKCS_A1518T
DNA-PKCS	3	missense	A1518V	DNA-PKCS	1518	1518	A	V	Saturation-Mutagenesis	0.118	78.8701	-2.327	Neutral	0.980388	-31	deleterious	-1.328	-2.854	97.4899	0.493554	1.29615	18.044	0.0608298	1.6592	DNA-PKCS_A1518V
DNA-PKCS	3	missense	A1518W	DNA-PKCS	1518	1518	A	W	Saturation-Mutagenesis	-0.703	78.8701	-4.856	Deleterious	0.980388	31	deleterious	-1.702	-4.707	97.4899	0.493554	1.29615	18.044	0.0608298	1.6592	DNA-PKCS_A1518W
DNA-PKCS	3	missense	A1518Y	DNA-PKCS	1518	1518	A	Y	Saturation-Mutagenesis	-1.166	78.8701	-4.024	Deleterious	0.980388	38	deleterious	-1.702	-4.069	97.4899	0.493554	1.29615	18.044	0.0608298	1.6592	DNA-PKCS_A1518Y
DNA-PKCS	3	missense	A1520C	DNA-PKCS	1520	1520	A	C	Saturation-Mutagenesis	-1.039	74.8606	-1.253	Neutral	1.01711	-36	neutral	-1.855	-2.54	100.383	0.545231	1.24534	18.1965	0.0642831	1.95895	DNA-PKCS_A1520C
DNA-PKCS	3	missense	A1520D	DNA-PKCS	1520	1520	A	D	Saturation-Mutagenesis	-1.195	74.8606	-1.489	Neutral	1.01711	-46	neutral	-1.855	-2.311	100.383	0.545231	1.24534	18.1965	0.0642831	1.95895	DNA-PKCS_A1520D
DNA-PKCS	3	missense	A1520E	DNA-PKCS	1520	1520	A	E	Saturation-Mutagenesis	-1.236	74.8606	-1.271	Neutral	1.01711	-32	neutral	-1.855	-2.713	100.383	0.545231	1.24534	18.1965	0.0642831	1.95895	DNA-PKCS_A1520E
DNA-PKCS	3	missense	A1520F	DNA-PKCS	1520	1520	A	F	Saturation-Mutagenesis	-0.053	74.8606	-2.603	Deleterious	1.01711	-6	deleterious	-1.76	-4.751	100.383	0.545231	1.24534	18.1965	0.0642831	1.95895	DNA-PKCS_A1520F
DNA-PKCS	3	missense	A1520G	DNA-PKCS	1520	1520	A	G	Saturation-Mutagenesis	-1.039	74.8606	-1.49	Neutral	1.01711	-27	neutral	-1.855	-2.717	100.383	0.545231	1.24534	18.1965	0.0642831	1.95895	DNA-PKCS_A1520G
DNA-PKCS	3	missense	A1520H	DNA-PKCS	1520	1520	A	H	Saturation-Mutagenesis	-0.788	74.8606	-2.262	Neutral	1.01711	-51	neutral	-1.855	-3.561	100.383	0.545231	1.24534	18.1965	0.0642831	1.95895	DNA-PKCS_A1520H
DNA-PKCS	3	missense	A1520I	DNA-PKCS	1520	1520	A	I	Saturation-Mutagenesis	-0.795	74.8606	-2.018	Neutral	1.01711	-26	deleterious	-1.855	-4.105	100.383	0.545231	1.24534	18.1965	0.0642831	1.95895	DNA-PKCS_A1520I
DNA-PKCS	3	missense	A1520K	DNA-PKCS	1520	1520	A	K	Saturation-Mutagenesis	-0.985	74.8606	-1.438	Neutral	1.01711	-43	neutral	-1.855	-2.126	100.383	0.545231	1.24534	18.1965	0.0642831	1.95895	DNA-PKCS_A1520K
DNA-PKCS	3	missense	A1520L	DNA-PKCS	1520	1520	A	L	Saturation-Mutagenesis	-0.949	74.8606	-2.018	Neutral	1.01711	25	deleterious	-1.855	-4.21	100.383	0.545231	1.24534	18.1965	0.0642831	1.95895	DNA-PKCS_A1520L
DNA-PKCS	3	missense	A1520M	DNA-PKCS	1520	1520	A	M	Saturation-Mutagenesis	-1.493	74.8606	-1.645	Neutral	1.01711	19	neutral	-1.76	-2.711	100.383	0.545231	1.24534	18.1965	0.0642831	1.95895	DNA-PKCS_A1520M
DNA-PKCS	3	missense	A1520N	DNA-PKCS	1520	1520	A	N	Saturation-Mutagenesis	-0.881	74.8606	-1.448	Neutral	1.01711	-30	neutral	-1.855	-2.428	100.383	0.545231	1.24534	18.1965	0.0642831	1.95895	DNA-PKCS_A1520N
DNA-PKCS	3	missense	A1520P	DNA-PKCS	1520	1520	A	P	Saturation-Mutagenesis	-0.869	74.8606	-1.904	Neutral	1.01711	-26	neutral	-1.855	-3.183	100.383	0.545231	1.24534	18.1965	0.0642831	1.95895	DNA-PKCS_A1520P
DNA-PKCS	3	missense	A1520Q	DNA-PKCS	1520	1520	A	Q	Saturation-Mutagenesis	-0.881	74.8606	-1.471	Neutral	1.01711	-45	deleterious	-1.855	-3.859	100.383	0.545231	1.24534	18.1965	0.0642831	1.95895	DNA-PKCS_A1520Q
DNA-PKCS	3	missense	A1520R	DNA-PKCS	1520	1520	A	R	Saturation-Mutagenesis	-1.164	74.8606	-1.871	Neutral	1.01711	-43	neutral	-1.855	-3.592	100.383	0.545231	1.24534	18.1965	0.0642831	1.95895	DNA-PKCS_A1520R
DNA-PKCS	3	missense	A1520S	DNA-PKCS	1520	1520	A	S	Saturation-Mutagenesis	-0.954	74.8606	-0.108	Neutral	1.01711	-27	deleterious	-1.855	-4.009	100.383	0.545231	1.24534	18.1965	0.0642831	1.95895	DNA-PKCS_A1520S
DNA-PKCS	3	missense	A1520T	DNA-PKCS	1520	1520	A	T	Saturation-Mutagenesis	-0.448	74.8606	-0.68	Neutral	1.01711	-36	neutral	-1.855	-2.995	100.383	0.545231	1.24534	18.1965	0.0642831	1.95895	DNA-PKCS_A1520T
DNA-PKCS	3	missense	A1520V	DNA-PKCS	1520	1520	A	V	Saturation-Mutagenesis	-0.747	74.8606	-1.587	Neutral	1.01711	-21	deleterious	-1.855	-4.504	100.383	0.545231	1.24534	18.1965	0.0642831	1.95895	DNA-PKCS_A1520V
DNA-PKCS	3	missense	A1520W	DNA-PKCS	1520	1520	A	W	Saturation-Mutagenesis	-1.188	74.8606	-3.22	Deleterious	1.01711	38	deleterious	-1.76	-3.805	100.383	0.545231	1.24534	18.1965	0.0642831	1.95895	DNA-PKCS_A1520W
DNA-PKCS	3	missense	A1520Y	DNA-PKCS	1520	1520	A	Y	Saturation-Mutagenesis	-1.495	74.8606	-2.569	Deleterious	1.01711	14	deleterious	-1.76	-3.554	100.383	0.545231	1.24534	18.1965	0.0642831	1.95895	DNA-PKCS_A1520Y
DNA-PKCS	3	missense	A1578C	DNA-PKCS	1578	1578	A	C	Saturation-Mutagenesis	-0.725	72.0755	-1.155	Neutral	1.00746	63	neutral	-2.224	-2.782	102.495	0.153325	0.437027	8.92036	0.0312468	0.412478	DNA-PKCS_A1578C
DNA-PKCS	3	missense	A1578D	DNA-PKCS	1578	1578	A	D	Saturation-Mutagenesis	-0.745	72.0755	-2.055	Neutral	1.00746	37	neutral	-2.224	-3.404	102.495	0.153325	0.437027	8.92036	0.0312468	0.412478	DNA-PKCS_A1578D
DNA-PKCS	3	missense	A1578E	DNA-PKCS	1578	1578	A	E	Saturation-Mutagenesis	-0.785	72.0755	-1.638	Neutral	1.00746	34	neutral	-2.224	-2.646	102.495	0.153325	0.437027	8.92036	0.0312468	0.412478	DNA-PKCS_A1578E
DNA-PKCS	3	missense	A1578F	DNA-PKCS	1578	1578	A	F	Saturation-Mutagenesis	0.367	72.0755	-0.697	Neutral	1.00746	-6	deleterious	-2.224	-4.134	102.495	0.153325	0.437027	8.92036	0.0312468	0.412478	DNA-PKCS_A1578F
DNA-PKCS	3	missense	A1578G	DNA-PKCS	1578	1578	A	G	Saturation-Mutagenesis	-0.725	72.0755	-1.743	Neutral	1.00746	27	neutral	-2.224	-2.269	102.495	0.153325	0.437027	8.92036	0.0312468	0.412478	DNA-PKCS_A1578G
DNA-PKCS	3	missense	A1578H	DNA-PKCS	1578	1578	A	H	Saturation-Mutagenesis	-0.389	72.0755	-1.487	Neutral	1.00746	43	neutral	-2.224	-2.733	102.495	0.153325	0.437027	8.92036	0.0312468	0.412478	DNA-PKCS_A1578H
DNA-PKCS	3	missense	A1578I	DNA-PKCS	1578	1578	A	I	Saturation-Mutagenesis	-0.085	72.0755	-1.206	Neutral	1.00746	27	neutral	-2.224	-3.291	102.495	0.153325	0.437027	8.92036	0.0312468	0.412478	DNA-PKCS_A1578I
DNA-PKCS	3	missense	A1578K	DNA-PKCS	1578	1578	A	K	Saturation-Mutagenesis	-0.526	72.0755	-1.805	Neutral	1.00746	44	neutral	-2.224	-2.241	102.495	0.153325	0.437027	8.92036	0.0312468	0.412478	DNA-PKCS_A1578K
DNA-PKCS	3	missense	A1578L	DNA-PKCS	1578	1578	A	L	Saturation-Mutagenesis	-0.187	72.0755	-1.246	Neutral	1.00746	24	deleterious	-2.224	-4.576	102.495	0.153325	0.437027	8.92036	0.0312468	0.412478	DNA-PKCS_A1578L
DNA-PKCS	3	missense	A1578M	DNA-PKCS	1578	1578	A	M	Saturation-Mutagenesis	-0.312	72.0755	-1.262	Neutral	1.00746	-18	neutral	-2.224	-2.942	102.495	0.153325	0.437027	8.92036	0.0312468	0.412478	DNA-PKCS_A1578M
DNA-PKCS	3	missense	A1578N	DNA-PKCS	1578	1578	A	N	Saturation-Mutagenesis	-0.638	72.0755	-1.59	Neutral	1.00746	41	deleterious	-2.224	-4.882	102.495	0.153325	0.437027	8.92036	0.0312468	0.412478	DNA-PKCS_A1578N
DNA-PKCS	3	missense	A1578P	DNA-PKCS	1578	1578	A	P	Saturation-Mutagenesis	-0.569	72.0755	-1.905	Neutral	1.00746	21	neutral	-2.224	-2.65	102.495	0.153325	0.437027	8.92036	0.0312468	0.412478	DNA-PKCS_A1578P
DNA-PKCS	3	missense	A1578Q	DNA-PKCS	1578	1578	A	Q	Saturation-Mutagenesis	-0.638	72.0755	-1.705	Neutral	1.00746	27	neutral	-2.224	-2.527	102.495	0.153325	0.437027	8.92036	0.0312468	0.412478	DNA-PKCS_A1578Q
DNA-PKCS	3	missense	A1578R	DNA-PKCS	1578	1578	A	R	Saturation-Mutagenesis	-1.157	72.0755	-1.808	Neutral	1.00746	42	deleterious	-2.224	-4.699	102.495	0.153325	0.437027	8.92036	0.0312468	0.412478	DNA-PKCS_A1578R
DNA-PKCS	1	missense	A1578S	DNA-PKCS	1578	1578	A	S	Pathogenic	-0.649	72.0755	-0.498	Neutral	1.00746	36	neutral	-2.224	-3.668	102.495	0.153325	0.437027	8.92036	0.0312468	0.412478	DNA-PKCS_A1578S
DNA-PKCS	3	missense	A1578T	DNA-PKCS	1578	1578	A	T	Saturation-Mutagenesis	-0.417	72.0755	-0.661	Neutral	1.00746	36	deleterious	-2.224	-3.968	102.495	0.153325	0.437027	8.92036	0.0312468	0.412478	DNA-PKCS_A1578T
DNA-PKCS	2	missense	A1578V	DNA-PKCS	1578	1578	A	V	Non-Pathogenic	-0.109	72.0755	-1.074	Neutral	1.00746	25	neutral	-2.224	-2.812	102.495	0.153325	0.437027	8.92036	0.0312468	0.412478	DNA-PKCS_A1578V
DNA-PKCS	3	missense	A1578W	DNA-PKCS	1578	1578	A	W	Saturation-Mutagenesis	0.258	72.0755	-2.134	Neutral	1.00746	16	deleterious	-2.164	-4.709	102.495	0.153325	0.437027	8.92036	0.0312468	0.412478	DNA-PKCS_A1578W
DNA-PKCS	3	missense	A1578Y	DNA-PKCS	1578	1578	A	Y	Saturation-Mutagenesis	-0.149	72.0755	-1.047	Neutral	1.00746	-13	neutral	-2.164	-3.867	102.495	0.153325	0.437027	8.92036	0.0312468	0.412478	DNA-PKCS_A1578Y
DNA-PKCS	3	missense	A1595C	DNA-PKCS	1595	1595	A	C	Saturation-Mutagenesis	-0.615	64.2314	-1.101	Neutral	0.943276	34	deleterious	-1.536	-3.576	99.7194	0.179586	0.43017	9.08852	0.0291875	0.422568	DNA-PKCS_A1595C
DNA-PKCS	3	missense	A1595D	DNA-PKCS	1595	1595	A	D	Saturation-Mutagenesis	-0.602	64.2314	-1.327	Neutral	0.943276	-4	deleterious	-1.271	-3.941	99.7194	0.179586	0.43017	9.08852	0.0291875	0.422568	DNA-PKCS_A1595D
DNA-PKCS	3	missense	A1595E	DNA-PKCS	1595	1595	A	E	Saturation-Mutagenesis	-0.558	64.2314	-0.9	Neutral	0.943276	-74	deleterious	-1.536	-4.011	99.7194	0.179586	0.43017	9.08852	0.0291875	0.422568	DNA-PKCS_A1595E
DNA-PKCS	3	missense	A1595F	DNA-PKCS	1595	1595	A	F	Saturation-Mutagenesis	0.072	64.2314	-1.493	Neutral	0.943276	-73	deleterious	-1.536	-3.134	99.7194	0.179586	0.43017	9.08852	0.0291875	0.422568	DNA-PKCS_A1595F
DNA-PKCS	3	missense	A1595G	DNA-PKCS	1595	1595	A	G	Saturation-Mutagenesis	-0.615	64.2314	-1.09	Neutral	0.943276	-29	deleterious	-1.536	-3.477	99.7194	0.179586	0.43017	9.08852	0.0291875	0.422568	DNA-PKCS_A1595G
DNA-PKCS	3	missense	A1595H	DNA-PKCS	1595	1595	A	H	Saturation-Mutagenesis	-0.238	64.2314	-1.414	Neutral	0.943276	44	deleterious	-1.271	-4.029	99.7194	0.179586	0.43017	9.08852	0.0291875	0.422568	DNA-PKCS_A1595H
DNA-PKCS	3	missense	A1595I	DNA-PKCS	1595	1595	A	I	Saturation-Mutagenesis	0.085	64.2314	-1.043	Neutral	0.943276	-15	deleterious	-1.536	-4.736	99.7194	0.179586	0.43017	9.08852	0.0291875	0.422568	DNA-PKCS_A1595I
DNA-PKCS	3	missense	A1595K	DNA-PKCS	1595	1595	A	K	Saturation-Mutagenesis	-0.345	64.2314	-0.466	Neutral	0.943276	25	deleterious	-1.271	-3.8	99.7194	0.179586	0.43017	9.08852	0.0291875	0.422568	DNA-PKCS_A1595K
DNA-PKCS	3	missense	A1595L	DNA-PKCS	1595	1595	A	L	Saturation-Mutagenesis	0.073	64.2314	-1.176	Neutral	0.943276	-31	deleterious	-1.536	-3.595	99.7194	0.179586	0.43017	9.08852	0.0291875	0.422568	DNA-PKCS_A1595L
DNA-PKCS	3	missense	A1595M	DNA-PKCS	1595	1595	A	M	Saturation-Mutagenesis	-0.831	64.2314	-0.939	Neutral	0.943276	-76	deleterious	-1.536	-4.062	99.7194	0.179586	0.43017	9.08852	0.0291875	0.422568	DNA-PKCS_A1595M
DNA-PKCS	3	missense	A1595N	DNA-PKCS	1595	1595	A	N	Saturation-Mutagenesis	-0.559	64.2314	-0.991	Neutral	0.943276	-41	deleterious	-1.536	-3.884	99.7194	0.179586	0.43017	9.08852	0.0291875	0.422568	DNA-PKCS_A1595N
DNA-PKCS	2	missense	A1595P	DNA-PKCS	1595	1595	A	P	Non-Pathogenic	-0.426	64.2314	-1.495	Neutral	0.943276	-41	deleterious	-1.536	-3.976	99.7194	0.179586	0.43017	9.08852	0.0291875	0.422568	DNA-PKCS_A1595P
DNA-PKCS	3	missense	A1595Q	DNA-PKCS	1595	1595	A	Q	Saturation-Mutagenesis	-0.559	64.2314	-0.8	Neutral	0.943276	-36	deleterious	-1.536	-3.709	99.7194	0.179586	0.43017	9.08852	0.0291875	0.422568	DNA-PKCS_A1595Q
DNA-PKCS	3	missense	A1595R	DNA-PKCS	1595	1595	A	R	Saturation-Mutagenesis	-0.705	64.2314	-1.055	Neutral	0.943276	-29	deleterious	-1.271	-2.076	99.7194	0.179586	0.43017	9.08852	0.0291875	0.422568	DNA-PKCS_A1595R
DNA-PKCS	3	missense	A1595S	DNA-PKCS	1595	1595	A	S	Saturation-Mutagenesis	-0.317	64.2314	-0.062	Neutral	0.943276	-85	deleterious	-1.536	-4.146	99.7194	0.179586	0.43017	9.08852	0.0291875	0.422568	DNA-PKCS_A1595S
DNA-PKCS	1	missense	A1595T	DNA-PKCS	1595	1595	A	T	Pathogenic	-0.423	64.2314	-0.047	Neutral	0.943276	-85	deleterious	-1.536	-3.726	99.7194	0.179586	0.43017	9.08852	0.0291875	0.422568	DNA-PKCS_A1595T
DNA-PKCS	1	missense	A1595V	DNA-PKCS	1595	1595	A	V	Pathogenic	0.077	64.2314	-0.636	Neutral	0.943276	-35	deleterious	-1.536	-4.048	99.7194	0.179586	0.43017	9.08852	0.0291875	0.422568	DNA-PKCS_A1595V
DNA-PKCS	3	missense	A1595W	DNA-PKCS	1595	1595	A	W	Saturation-Mutagenesis	-0.371	64.2314	-1.849	Neutral	0.943276	-45	deleterious	-1.536	-2.12	99.7194	0.179586	0.43017	9.08852	0.0291875	0.422568	DNA-PKCS_A1595W
DNA-PKCS	3	missense	A1595Y	DNA-PKCS	1595	1595	A	Y	Saturation-Mutagenesis	-0.718	64.2314	-1.39	Neutral	0.943276	-51	deleterious	-1.536	-2.219	99.7194	0.179586	0.43017	9.08852	0.0291875	0.422568	DNA-PKCS_A1595Y
DNA-PKCS	3	missense	A1609C	DNA-PKCS	1609	1609	A	C	Saturation-Mutagenesis	-0.02	56.2921	-1.902	Neutral	0.938375	79	deleterious	-1.573	-3.821	85.6649	0.206797	0.583453	10.3802	0.0374395	0.57227	DNA-PKCS_A1609C
DNA-PKCS	3	missense	A1609D	DNA-PKCS	1609	1609	A	D	Saturation-Mutagenesis	0.18	56.2921	-1.341	Neutral	0.938375	37	neutral	-1.756	-3.412	85.6649	0.206797	0.583453	10.3802	0.0374395	0.57227	DNA-PKCS_A1609D
DNA-PKCS	3	missense	A1609E	DNA-PKCS	1609	1609	A	E	Saturation-Mutagenesis	0.332	56.2921	-0.906	Neutral	0.938375	48	deleterious	-1.756	-3.753	85.6649	0.206797	0.583453	10.3802	0.0374395	0.57227	DNA-PKCS_A1609E
DNA-PKCS	3	missense	A1609F	DNA-PKCS	1609	1609	A	F	Saturation-Mutagenesis	0.371	56.2921	-2.498	Neutral	0.938375	-36	deleterious	-1.573	-3.801	85.6649	0.206797	0.583453	10.3802	0.0374395	0.57227	DNA-PKCS_A1609F
DNA-PKCS	3	missense	A1609G	DNA-PKCS	1609	1609	A	G	Saturation-Mutagenesis	-0.02	56.2921	-0.935	Neutral	0.938375	13	deleterious	-1.573	-4.604	85.6649	0.206797	0.583453	10.3802	0.0374395	0.57227	DNA-PKCS_A1609G
DNA-PKCS	3	missense	A1609H	DNA-PKCS	1609	1609	A	H	Saturation-Mutagenesis	0.336	56.2921	-1.37	Neutral	0.938375	26	neutral	-1.756	-3.289	85.6649	0.206797	0.583453	10.3802	0.0374395	0.57227	DNA-PKCS_A1609H
DNA-PKCS	3	missense	A1609I	DNA-PKCS	1609	1609	A	I	Saturation-Mutagenesis	0.737	56.2921	-2.162	Neutral	0.938375	41	neutral	-1.573	-2.536	85.6649	0.206797	0.583453	10.3802	0.0374395	0.57227	DNA-PKCS_A1609I
DNA-PKCS	3	missense	A1609K	DNA-PKCS	1609	1609	A	K	Saturation-Mutagenesis	0.323	56.2921	-0.84	Neutral	0.938375	-2	neutral	-1.756	-2.368	85.6649	0.206797	0.583453	10.3802	0.0374395	0.57227	DNA-PKCS_A1609K
DNA-PKCS	3	missense	A1609L	DNA-PKCS	1609	1609	A	L	Saturation-Mutagenesis	0.774	56.2921	-1.932	Neutral	0.938375	-12	neutral	-1.573	-3.197	85.6649	0.206797	0.583453	10.3802	0.0374395	0.57227	DNA-PKCS_A1609L
DNA-PKCS	3	missense	A1609M	DNA-PKCS	1609	1609	A	M	Saturation-Mutagenesis	-0.082	56.2921	-1.7	Neutral	0.938375	-2	deleterious	-1.573	-3.591	85.6649	0.206797	0.583453	10.3802	0.0374395	0.57227	DNA-PKCS_A1609M
DNA-PKCS	3	missense	A1609N	DNA-PKCS	1609	1609	A	N	Saturation-Mutagenesis	-0.049	56.2921	-0.679	Neutral	0.938375	60	deleterious	-1.756	-4.174	85.6649	0.206797	0.583453	10.3802	0.0374395	0.57227	DNA-PKCS_A1609N
DNA-PKCS	3	missense	A1609P	DNA-PKCS	1609	1609	A	P	Saturation-Mutagenesis	0.358	56.2921	-1.306	Neutral	0.938375	-17	neutral	-1.573	-3.396	85.6649	0.206797	0.583453	10.3802	0.0374395	0.57227	DNA-PKCS_A1609P
DNA-PKCS	3	missense	A1609Q	DNA-PKCS	1609	1609	A	Q	Saturation-Mutagenesis	-0.049	56.2921	-0.873	Neutral	0.938375	45	deleterious	-1.756	-4.094	85.6649	0.206797	0.583453	10.3802	0.0374395	0.57227	DNA-PKCS_A1609Q
DNA-PKCS	3	missense	A1609R	DNA-PKCS	1609	1609	A	R	Saturation-Mutagenesis	0.452	56.2921	-0.873	Neutral	0.938375	26	deleterious	-1.756	-4.865	85.6649	0.213709	0.473124	10.1167	0.0363775	0.556389	DNA-PKCS_A1609R
DNA-PKCS	3	missense	A1609S	DNA-PKCS	1609	1609	A	S	Saturation-Mutagenesis	0.613	56.2921	0.122	Neutral	0.938375	53	neutral	-1.756	-2.561	85.6649	0.206797	0.583453	10.3802	0.0374395	0.57227	DNA-PKCS_A1609S
DNA-PKCS	1	missense	A1609T	DNA-PKCS	1609	1609	A	T	Pathogenic	-0.16	56.2921	-0.163	Neutral	0.938375	48	deleterious	-1.756	-4.498	85.6649	0.206797	0.583453	10.3802	0.0374395	0.57227	DNA-PKCS_A1609T
DNA-PKCS	3	missense	A1609V	DNA-PKCS	1609	1609	A	V	Saturation-Mutagenesis	0.703	56.2921	-1.667	Neutral	0.938375	7	neutral	-1.573	-3.415	85.6649	0.206797	0.583453	10.3802	0.0374395	0.57227	DNA-PKCS_A1609V
DNA-PKCS	3	missense	A1609W	DNA-PKCS	1609	1609	A	W	Saturation-Mutagenesis	0.073	56.2921	-2.505	Deleterious	0.979439	-29	neutral	-1.573	-3.149	85.6649	0.206797	0.583453	10.3802	0.0374395	0.57227	DNA-PKCS_A1609W
DNA-PKCS	3	missense	A1609Y	DNA-PKCS	1609	1609	A	Y	Saturation-Mutagenesis	0.033	56.2921	-2.033	Neutral	0.938375	5	neutral	-1.573	-2.896	85.6649	0.206797	0.583453	10.3802	0.0374395	0.57227	DNA-PKCS_A1609Y
DNA-PKCS	3	missense	A161C	DNA-PKCS	161	161	A	C	Saturation-Mutagenesis	-0.699	53.6669	-0.591	Neutral	0.791045	-19	deleterious	-1.815	-4.528	111.133	0.213724	0.543574	10.3666	0.0374241	0.638937	DNA-PKCS_A161C
DNA-PKCS	3	missense	A161D	DNA-PKCS	161	161	A	D	Saturation-Mutagenesis	-1.044	53.6669	-1.888	Neutral	0.791045	14	deleterious	-1.815	-4.736	111.133	0.213724	0.543574	10.3666	0.0374241	0.638937	DNA-PKCS_A161D
DNA-PKCS	1	missense	A161E	DNA-PKCS	161	161	A	E	Pathogenic	-0.804	53.6669	-1.807	Neutral	0.791045	0	neutral	-1.815	-2.175	111.133	0.213724	0.543574	10.3666	0.0374241	0.638937	DNA-PKCS_A161E
DNA-PKCS	3	missense	A161F	DNA-PKCS	161	161	A	F	Saturation-Mutagenesis	-0.924	53.6669	-1.431	Neutral	0.791045	38	neutral	-2.032	-2.058	111.133	0.213724	0.543574	10.3666	0.0374241	0.638937	DNA-PKCS_A161F
DNA-PKCS	3	missense	A161G	DNA-PKCS	161	161	A	G	Saturation-Mutagenesis	-1.072	53.6669	-1.582	Neutral	0.791045	-12	deleterious	-1.815	-4.157	111.133	0.213724	0.543574	10.3666	0.0374241	0.638937	DNA-PKCS_A161G
DNA-PKCS	3	missense	A161H	DNA-PKCS	161	161	A	H	Saturation-Mutagenesis	-1.464	53.6669	-2.055	Neutral	0.791045	27	neutral	-1.815	-2.182	111.133	0.213724	0.543574	10.3666	0.0374241	0.638937	DNA-PKCS_A161H
DNA-PKCS	3	missense	A161I	DNA-PKCS	161	161	A	I	Saturation-Mutagenesis	-1.202	53.6669	-1.581	Neutral	0.791045	7	neutral	-2.032	-4.612	111.133	0.213724	0.543574	10.3666	0.0374241	0.638937	DNA-PKCS_A161I
DNA-PKCS	3	missense	A161K	DNA-PKCS	161	161	A	K	Saturation-Mutagenesis	-0.873	53.6669	-1.873	Neutral	0.791045	45	neutral	-1.815	-2.627	111.133	0.213724	0.543574	10.3666	0.0374241	0.638937	DNA-PKCS_A161K
DNA-PKCS	3	missense	A161L	DNA-PKCS	161	161	A	L	Saturation-Mutagenesis	-1.092	53.6669	-1.371	Neutral	0.791045	-2	neutral	-2.032	-2.51	111.133	0.213724	0.543574	10.3666	0.0374241	0.638937	DNA-PKCS_A161L
DNA-PKCS	3	missense	A161M	DNA-PKCS	161	161	A	M	Saturation-Mutagenesis	-0.899	53.6669	-1.571	Neutral	0.791045	-39	neutral	-2.032	-3.454	111.133	0.213724	0.543574	10.3666	0.0374241	0.638937	DNA-PKCS_A161M
DNA-PKCS	3	missense	A161N	DNA-PKCS	161	161	A	N	Saturation-Mutagenesis	-1.215	53.6669	-1.955	Neutral	0.791045	40	deleterious	-1.815	-3.792	111.133	0.213724	0.543574	10.3666	0.0374241	0.638937	DNA-PKCS_A161N
DNA-PKCS	3	missense	A161P	DNA-PKCS	161	161	A	P	Saturation-Mutagenesis	-1.072	53.6669	-2.107	Neutral	0.791045	-31	deleterious	-1.815	-4.147	111.133	0.213724	0.543574	10.3666	0.0374241	0.638937	DNA-PKCS_A161P
DNA-PKCS	3	missense	A161Q	DNA-PKCS	161	161	A	Q	Saturation-Mutagenesis	-1.104	53.6669	-1.873	Neutral	0.791045	0	neutral	-1.815	-3.338	111.133	0.213724	0.543574	10.3666	0.0374241	0.638937	DNA-PKCS_A161Q
DNA-PKCS	3	missense	A161R	DNA-PKCS	161	161	A	R	Saturation-Mutagenesis	-0.218	53.6669	-2.018	Neutral	0.791045	37	neutral	-1.815	-2.366	111.133	0.213724	0.543574	10.3666	0.0374241	0.638937	DNA-PKCS_A161R
DNA-PKCS	3	missense	A161S	DNA-PKCS	161	161	A	S	Saturation-Mutagenesis	-0.991	53.6669	-0.6	Neutral	0.791045	68	deleterious	-1.815	-3.716	111.133	0.213724	0.543574	10.3666	0.0374241	0.638937	DNA-PKCS_A161S
DNA-PKCS	3	missense	A161T	DNA-PKCS	161	161	A	T	Saturation-Mutagenesis	-1.139	53.6669	-0.98	Neutral	0.791045	62	deleterious	-1.815	-3.372	111.133	0.213724	0.543574	10.3666	0.0374241	0.638937	DNA-PKCS_A161T
DNA-PKCS	3	missense	A161V	DNA-PKCS	161	161	A	V	Saturation-Mutagenesis	-1.202	53.6669	-1.332	Neutral	0.791045	-36	neutral	-2.032	-3.691	111.133	0.213724	0.543574	10.3666	0.0374241	0.638937	DNA-PKCS_A161V
DNA-PKCS	3	missense	A161W	DNA-PKCS	161	161	A	W	Saturation-Mutagenesis	-0.02	53.6669	-2.458	Neutral	0.762376	3	neutral	-2.032	-3.303	111.133	0.213724	0.543574	10.3666	0.0374241	0.638937	DNA-PKCS_A161W
DNA-PKCS	3	missense	A161Y	DNA-PKCS	161	161	A	Y	Saturation-Mutagenesis	-1.028	53.6669	-1.765	Neutral	0.791045	31	neutral	-2.032	-2.497	111.133	0.213724	0.543574	10.3666	0.0374241	0.638937	DNA-PKCS_A161Y
DNA-PKCS	3	missense	A1634C	DNA-PKCS	1634	1634	A	C	Saturation-Mutagenesis	-0.972	62.1966	-1.332	Neutral	0.984288	51	neutral	-2.225	-1.829	88.2275	0.195698	0.52652	9.69216	0.0351204	0.506331	DNA-PKCS_A1634C
DNA-PKCS	3	missense	A1634D	DNA-PKCS	1634	1634	A	D	Saturation-Mutagenesis	-1.205	62.1966	-1.766	Neutral	0.984288	-39	deleterious	-1.731	-4.202	88.2275	0.195698	0.52652	9.69216	0.0351204	0.506331	DNA-PKCS_A1634D
DNA-PKCS	3	missense	A1634E	DNA-PKCS	1634	1634	A	E	Saturation-Mutagenesis	-1.243	62.1966	-1.506	Neutral	0.984288	-83	neutral	-2.225	-3.711	88.2275	0.195698	0.52652	9.69216	0.0351204	0.506331	DNA-PKCS_A1634E
DNA-PKCS	3	missense	A1634F	DNA-PKCS	1634	1634	A	F	Saturation-Mutagenesis	0.233	62.1966	-2.224	Neutral	0.984288	20	neutral	-2.225	-3.343	88.2275	0.195698	0.52652	9.69216	0.0351204	0.506331	DNA-PKCS_A1634F
DNA-PKCS	3	missense	A1634G	DNA-PKCS	1634	1634	A	G	Saturation-Mutagenesis	-0.972	62.1966	-1.414	Neutral	0.984288	41	neutral	-2.225	-2.167	88.2275	0.195698	0.52652	9.69216	0.0351204	0.506331	DNA-PKCS_A1634G
DNA-PKCS	3	missense	A1634H	DNA-PKCS	1634	1634	A	H	Saturation-Mutagenesis	-0.77	62.1966	-2.121	Neutral	0.984288	29	deleterious	-1.731	-4.535	88.2275	0.195698	0.52652	9.69216	0.0351204	0.506331	DNA-PKCS_A1634H
DNA-PKCS	3	missense	A1634I	DNA-PKCS	1634	1634	A	I	Saturation-Mutagenesis	-0.606	62.1966	-1.612	Neutral	0.984288	59	neutral	-2.225	-3.205	88.2275	0.195698	0.52652	9.69216	0.0351204	0.506331	DNA-PKCS_A1634I
DNA-PKCS	3	missense	A1634K	DNA-PKCS	1634	1634	A	K	Saturation-Mutagenesis	-0.943	62.1966	-1.822	Neutral	0.984288	8	deleterious	-1.731	-4.126	88.2275	0.195698	0.52652	9.69216	0.0351204	0.506331	DNA-PKCS_A1634K
DNA-PKCS	3	missense	A1634L	DNA-PKCS	1634	1634	A	L	Saturation-Mutagenesis	-0.77	62.1966	-1.345	Neutral	0.984288	38	deleterious	-2.225	-3.762	88.2275	0.195698	0.52652	9.69216	0.0351204	0.506331	DNA-PKCS_A1634L
DNA-PKCS	3	missense	A1634M	DNA-PKCS	1634	1634	A	M	Saturation-Mutagenesis	-0.893	62.1966	-1.476	Neutral	0.984288	30	neutral	-2.225	-2.221	88.2275	0.195698	0.52652	9.69216	0.0351204	0.506331	DNA-PKCS_A1634M
DNA-PKCS	3	missense	A1634N	DNA-PKCS	1634	1634	A	N	Saturation-Mutagenesis	-0.826	62.1966	-1.244	Neutral	0.984288	-9	neutral	-2.225	-3.477	88.2275	0.195698	0.52652	9.69216	0.0351204	0.506331	DNA-PKCS_A1634N
DNA-PKCS	3	missense	A1634P	DNA-PKCS	1634	1634	A	P	Saturation-Mutagenesis	-0.697	62.1966	-2.109	Neutral	0.984288	-17	neutral	-2.225	-3.554	88.2275	0.195698	0.52652	9.69216	0.0351204	0.506331	DNA-PKCS_A1634P
DNA-PKCS	3	missense	A1634Q	DNA-PKCS	1634	1634	A	Q	Saturation-Mutagenesis	-0.826	62.1966	-1.706	Neutral	0.984288	-7	neutral	-2.225	-3.337	88.2275	0.195698	0.52652	9.69216	0.0351204	0.506331	DNA-PKCS_A1634Q
DNA-PKCS	3	missense	A1634R	DNA-PKCS	1634	1634	A	R	Saturation-Mutagenesis	-1.548	62.1966	-1.959	Neutral	0.984288	-35	neutral	-1.731	-3.276	88.2275	0.189831	0.613032	10.0979	0.0337598	0.533929	DNA-PKCS_A1634R
DNA-PKCS	3	missense	A1634S	DNA-PKCS	1634	1634	A	S	Saturation-Mutagenesis	-0.827	62.1966	-0.519	Neutral	0.984288	-69	deleterious	-2.225	-4.579	88.2275	0.195698	0.52652	9.69216	0.0351204	0.506331	DNA-PKCS_A1634S
DNA-PKCS	3	missense	A1634T	DNA-PKCS	1634	1634	A	T	Saturation-Mutagenesis	-0.443	62.1966	-1.115	Neutral	0.984288	-51	neutral	-2.225	-3.39	88.2275	0.195698	0.52652	9.69216	0.0351204	0.506331	DNA-PKCS_A1634T
DNA-PKCS	3	missense	A1634V	DNA-PKCS	1634	1634	A	V	Saturation-Mutagenesis	-0.583	62.1966	-1.483	Neutral	0.984288	61	neutral	-2.225	-2.412	88.2275	0.195698	0.52652	9.69216	0.0351204	0.506331	DNA-PKCS_A1634V
DNA-PKCS	3	missense	A1634W	DNA-PKCS	1634	1634	A	W	Saturation-Mutagenesis	-0.151	62.1966	-2.771	Deleterious	0.984288	57	neutral	-2.225	-3.251	88.2275	0.195698	0.52652	9.69216	0.0351204	0.506331	DNA-PKCS_A1634W
DNA-PKCS	3	missense	A1634Y	DNA-PKCS	1634	1634	A	Y	Saturation-Mutagenesis	-0.042	62.1966	-2.257	Neutral	0.984288	41	deleterious	-2.225	-3.71	88.2275	0.195698	0.52652	9.69216	0.0351204	0.506331	DNA-PKCS_A1634Y
DNA-PKCS	3	missense	A1644C	DNA-PKCS	1644	1644	A	C	Saturation-Mutagenesis	-0.562	64.6395	-2.115	Neutral	0.929867	7	deleterious	-1.636	-3.988	98.0058	0.178482	0.454337	9.46397	0.0328662	0.529663	DNA-PKCS_A1644C
DNA-PKCS	3	missense	A1644D	DNA-PKCS	1644	1644	A	D	Saturation-Mutagenesis	-0.459	64.6395	-2.537	Deleterious	0.929867	40	neutral	-1.636	-1.821	98.0058	0.178482	0.454337	9.46397	0.0328662	0.529663	DNA-PKCS_A1644D
DNA-PKCS	3	missense	A1644E	DNA-PKCS	1644	1644	A	E	Saturation-Mutagenesis	-0.395	64.6395	-2.176	Neutral	0.929867	0	deleterious	-1.636	-5.139	98.0058	0.178482	0.454337	9.46397	0.0328662	0.529663	DNA-PKCS_A1644E
DNA-PKCS	3	missense	A1644F	DNA-PKCS	1644	1644	A	F	Saturation-Mutagenesis	0.429	64.6395	-3.008	Deleterious	0.929867	-14	deleterious	-1.254	-3.615	98.0058	0.178482	0.454337	9.46397	0.0328662	0.529663	DNA-PKCS_A1644F
DNA-PKCS	3	missense	A1644G	DNA-PKCS	1644	1644	A	G	Saturation-Mutagenesis	-0.562	64.6395	-1.686	Neutral	0.929867	-2	deleterious	-1.636	-3.501	98.0058	0.178482	0.454337	9.46397	0.0328662	0.529663	DNA-PKCS_A1644G
DNA-PKCS	3	missense	A1644H	DNA-PKCS	1644	1644	A	H	Saturation-Mutagenesis	-0.269	64.6395	-2.675	Deleterious	0.929867	68	deleterious	-1.636	-3.363	98.0058	0.178482	0.454337	9.46397	0.0328662	0.529663	DNA-PKCS_A1644H
DNA-PKCS	3	missense	A1644I	DNA-PKCS	1644	1644	A	I	Saturation-Mutagenesis	0.18	64.6395	-2.243	Neutral	0.929867	31	deleterious	-1.636	-4.08	98.0058	0.178482	0.454337	9.46397	0.0328662	0.529663	DNA-PKCS_A1644I
DNA-PKCS	3	missense	A1644K	DNA-PKCS	1644	1644	A	K	Saturation-Mutagenesis	-0.344	64.6395	-2.176	Neutral	0.929867	62	neutral	-1.636	-2.391	98.0058	0.178482	0.454337	9.46397	0.0328662	0.529663	DNA-PKCS_A1644K
DNA-PKCS	3	missense	A1644L	DNA-PKCS	1644	1644	A	L	Saturation-Mutagenesis	0.248	64.6395	-2.176	Neutral	0.929867	3	deleterious	-1.254	-3.893	98.0058	0.178482	0.454337	9.46397	0.0328662	0.529663	DNA-PKCS_A1644L
DNA-PKCS	3	missense	A1644M	DNA-PKCS	1644	1644	A	M	Saturation-Mutagenesis	-0.421	64.6395	-1.976	Neutral	0.929867	-7	deleterious	-1.254	-4.64	98.0058	0.178482	0.454337	9.46397	0.0328662	0.529663	DNA-PKCS_A1644M
DNA-PKCS	3	missense	A1644N	DNA-PKCS	1644	1644	A	N	Saturation-Mutagenesis	-0.541	64.6395	-1.833	Neutral	0.929867	-31	deleterious	-1.636	-3.114	98.0058	0.178482	0.454337	9.46397	0.0328662	0.529663	DNA-PKCS_A1644N
DNA-PKCS	3	missense	A1644P	DNA-PKCS	1644	1644	A	P	Saturation-Mutagenesis	-0.263	64.6395	-2.51	Deleterious	0.929867	-39	deleterious	-1.636	-4.521	98.0058	0.178482	0.454337	9.46397	0.0328662	0.529663	DNA-PKCS_A1644P
DNA-PKCS	3	missense	A1644Q	DNA-PKCS	1644	1644	A	Q	Saturation-Mutagenesis	-0.541	64.6395	-2.01	Neutral	0.929867	-36	deleterious	-1.636	-3.565	98.0058	0.178482	0.454337	9.46397	0.0328662	0.529663	DNA-PKCS_A1644Q
DNA-PKCS	3	missense	A1644R	DNA-PKCS	1644	1644	A	R	Saturation-Mutagenesis	-0.16	64.6395	-2.11	Neutral	0.929867	0	deleterious	-1.636	-3.102	98.0058	0.178482	0.454337	9.46397	0.0328662	0.529663	DNA-PKCS_A1644R
DNA-PKCS	3	missense	A1644S	DNA-PKCS	1644	1644	A	S	Saturation-Mutagenesis	-0.165	64.6395	-0.813	Neutral	0.929867	-19	deleterious	-1.636	-3.225	98.0058	0.178482	0.454337	9.46397	0.0328662	0.529663	DNA-PKCS_A1644S
DNA-PKCS	3	missense	A1644T	DNA-PKCS	1644	1644	A	T	Saturation-Mutagenesis	-0.489	64.6395	-0.858	Neutral	0.929867	-12	deleterious	-1.636	-3.661	98.0058	0.178482	0.454337	9.46397	0.0328662	0.529663	DNA-PKCS_A1644T
DNA-PKCS	3	missense	A1644V	DNA-PKCS	1644	1644	A	V	Saturation-Mutagenesis	0.164	64.6395	-1.745	Neutral	0.929867	38	deleterious	-1.636	-4.269	98.0058	0.178482	0.454337	9.46397	0.0328662	0.529663	DNA-PKCS_A1644V
DNA-PKCS	3	missense	A1644W	DNA-PKCS	1644	1644	A	W	Saturation-Mutagenesis	-0.023	64.6395	-3.669	Deleterious	0.929867	31	deleterious	-1.254	-3.717	98.0058	0.178482	0.454337	9.46397	0.0328662	0.529663	DNA-PKCS_A1644W
DNA-PKCS	3	missense	A1644Y	DNA-PKCS	1644	1644	A	Y	Saturation-Mutagenesis	-0.335	64.6395	-2.941	Deleterious	0.929867	-2	deleterious	-1.254	-3.82	98.0058	0.178482	0.454337	9.46397	0.0328662	0.529663	DNA-PKCS_A1644Y
DNA-PKCS	3	missense	A1647C	DNA-PKCS	1647	1647	A	C	Saturation-Mutagenesis	-0.072	68.5649	-1.576	Neutral	0.935776	42	deleterious	-1.386	-4.39	98.7607	0.205413	0.540085	9.79522	0.0346238	0.639156	DNA-PKCS_A1647C
DNA-PKCS	3	missense	A1647D	DNA-PKCS	1647	1647	A	D	Saturation-Mutagenesis	0.131	68.5649	-0.399	Neutral	0.935776	-32	neutral	-1.386	-2.179	98.7607	0.205413	0.540085	9.79522	0.0346238	0.639156	DNA-PKCS_A1647D
DNA-PKCS	3	missense	A1647E	DNA-PKCS	1647	1647	A	E	Saturation-Mutagenesis	0.315	68.5649	0.192	Neutral	0.935776	-22	deleterious	-1.386	-4.082	98.7607	0.205413	0.540085	9.79522	0.0346238	0.639156	DNA-PKCS_A1647E
DNA-PKCS	3	missense	A1647F	DNA-PKCS	1647	1647	A	F	Saturation-Mutagenesis	0.473	68.5649	-1.899	Neutral	0.935776	-24	neutral	-1.892	-2.157	98.7607	0.205413	0.540085	9.79522	0.0346238	0.639156	DNA-PKCS_A1647F
DNA-PKCS	3	missense	A1647G	DNA-PKCS	1647	1647	A	G	Saturation-Mutagenesis	-0.072	68.5649	-1.253	Neutral	0.935776	-14	deleterious	-1.386	-3.319	98.7607	0.205413	0.540085	9.79522	0.0346238	0.639156	DNA-PKCS_A1647G
DNA-PKCS	3	missense	A1647H	DNA-PKCS	1647	1647	A	H	Saturation-Mutagenesis	0.214	68.5649	-1.14	Neutral	0.935776	28	deleterious	-1.386	-4.066	98.7607	0.205413	0.540085	9.79522	0.0346238	0.639156	DNA-PKCS_A1647H
DNA-PKCS	3	missense	A1647I	DNA-PKCS	1647	1647	A	I	Saturation-Mutagenesis	0.646	68.5649	-1.494	Neutral	0.935776	26	neutral	-1.892	-2.648	98.7607	0.205413	0.540085	9.79522	0.0346238	0.639156	DNA-PKCS_A1647I
DNA-PKCS	3	missense	A1647K	DNA-PKCS	1647	1647	A	K	Saturation-Mutagenesis	0.222	68.5649	-0.375	Neutral	0.935776	-13	deleterious	-1.386	-4.901	98.7607	0.205413	0.540085	9.79522	0.0346238	0.639156	DNA-PKCS_A1647K
DNA-PKCS	3	missense	A1647L	DNA-PKCS	1647	1647	A	L	Saturation-Mutagenesis	0.691	68.5649	-1.316	Neutral	0.935776	-9	neutral	-1.892	-3.516	98.7607	0.205413	0.540085	9.79522	0.0346238	0.639156	DNA-PKCS_A1647L
DNA-PKCS	3	missense	A1647M	DNA-PKCS	1647	1647	A	M	Saturation-Mutagenesis	-0.257	68.5649	-0.967	Neutral	0.935776	-16	neutral	-1.892	-2.651	98.7607	0.205413	0.540085	9.79522	0.0346238	0.639156	DNA-PKCS_A1647M
DNA-PKCS	3	missense	A1647N	DNA-PKCS	1647	1647	A	N	Saturation-Mutagenesis	-0.116	68.5649	-0.292	Neutral	0.935776	-6	deleterious	-1.386	-3.528	98.7607	0.205413	0.540085	9.79522	0.0346238	0.639156	DNA-PKCS_A1647N
DNA-PKCS	3	missense	A1647P	DNA-PKCS	1647	1647	A	P	Saturation-Mutagenesis	0.492	68.5649	-1.178	Neutral	0.935776	-50	deleterious	-1.892	-3.747	98.7607	0.205413	0.540085	9.79522	0.0346238	0.639156	DNA-PKCS_A1647P
DNA-PKCS	3	missense	A1647Q	DNA-PKCS	1647	1647	A	Q	Saturation-Mutagenesis	-0.116	68.5649	-0.252	Neutral	0.935776	14	deleterious	-1.386	-3.101	98.7607	0.205413	0.540085	9.79522	0.0346238	0.639156	DNA-PKCS_A1647Q
DNA-PKCS	3	missense	A1647R	DNA-PKCS	1647	1647	A	R	Saturation-Mutagenesis	0.466	68.5649	-0.478	Neutral	0.935776	28	neutral	-1.386	-2.148	98.7607	0.17794	0.495837	9.33061	0.0334821	0.501361	DNA-PKCS_A1647R
DNA-PKCS	3	missense	A1647S	DNA-PKCS	1647	1647	A	S	Saturation-Mutagenesis	0.692	68.5649	0.497	Neutral	0.935776	-8	deleterious	-1.386	-3.172	98.7607	0.205413	0.540085	9.79522	0.0346238	0.639156	DNA-PKCS_A1647S
DNA-PKCS	3	missense	A1647T	DNA-PKCS	1647	1647	A	T	Saturation-Mutagenesis	-0.262	68.5649	0.451	Neutral	0.935776	-7	deleterious	-1.386	-3.414	98.7607	0.205413	0.540085	9.79522	0.0346238	0.639156	DNA-PKCS_A1647T
DNA-PKCS	3	missense	A1647V	DNA-PKCS	1647	1647	A	V	Saturation-Mutagenesis	0.606	68.5649	-1.077	Neutral	0.935776	33	deleterious	-1.892	-4.613	98.7607	0.205413	0.540085	9.79522	0.0346238	0.639156	DNA-PKCS_A1647V
DNA-PKCS	3	missense	A1647W	DNA-PKCS	1647	1647	A	W	Saturation-Mutagenesis	-0.07	68.5649	-2.339	Neutral	0.935776	27	neutral	-1.892	-2.729	98.7607	0.205413	0.540085	9.79522	0.0346238	0.639156	DNA-PKCS_A1647W
DNA-PKCS	3	missense	A1647Y	DNA-PKCS	1647	1647	A	Y	Saturation-Mutagenesis	-0.189	68.5649	-1.732	Neutral	0.935776	-10	neutral	-1.892	-3.341	98.7607	0.205413	0.540085	9.79522	0.0346238	0.639156	DNA-PKCS_A1647Y
DNA-PKCS	3	missense	A1650C	DNA-PKCS	1650	1650	A	C	Saturation-Mutagenesis	-0.956	69.1116	-2.16	Neutral	0.944099	42	neutral	-1.822	-2.716	102.348	0.211056	0.535055	9.72514	0.0348965	0.612219	DNA-PKCS_A1650C
DNA-PKCS	3	missense	A1650D	DNA-PKCS	1650	1650	A	D	Saturation-Mutagenesis	-1.119	69.1116	-2.157	Neutral	0.944099	-26	deleterious	-1.767	-3.818	102.348	0.211056	0.535055	9.72514	0.0348965	0.612219	DNA-PKCS_A1650D
DNA-PKCS	3	missense	A1650E	DNA-PKCS	1650	1650	A	E	Saturation-Mutagenesis	-1.192	69.1116	-1.325	Neutral	0.944099	-16	neutral	-1.767	-2.603	102.348	0.211056	0.535055	9.72514	0.0348965	0.612219	DNA-PKCS_A1650E
DNA-PKCS	3	missense	A1650F	DNA-PKCS	1650	1650	A	F	Saturation-Mutagenesis	0.062	69.1116	-3.057	Deleterious	0.944099	-47	neutral	-1.822	-2.62	102.348	0.211056	0.535055	9.72514	0.0348965	0.612219	DNA-PKCS_A1650F
DNA-PKCS	3	missense	A1650G	DNA-PKCS	1650	1650	A	G	Saturation-Mutagenesis	-0.956	69.1116	-1.827	Neutral	0.944099	-10	deleterious	-1.822	-4.443	102.348	0.211056	0.535055	9.72514	0.0348965	0.612219	DNA-PKCS_A1650G
DNA-PKCS	3	missense	A1650H	DNA-PKCS	1650	1650	A	H	Saturation-Mutagenesis	-0.728	69.1116	-2.324	Neutral	0.944099	-15	neutral	-1.767	-3.103	102.348	0.211056	0.535055	9.72514	0.0348965	0.612219	DNA-PKCS_A1650H
DNA-PKCS	3	missense	A1650I	DNA-PKCS	1650	1650	A	I	Saturation-Mutagenesis	-0.392	69.1116	-2.625	Deleterious	0.944099	17	neutral	-1.822	-2.266	102.348	0.211056	0.535055	9.72514	0.0348965	0.612219	DNA-PKCS_A1650I
DNA-PKCS	3	missense	A1650K	DNA-PKCS	1650	1650	A	K	Saturation-Mutagenesis	-0.894	69.1116	-0.892	Neutral	0.944099	-13	deleterious	-1.767	-3.582	102.348	0.211056	0.535055	9.72514	0.0348965	0.612219	DNA-PKCS_A1650K
DNA-PKCS	3	missense	A1650L	DNA-PKCS	1650	1650	A	L	Saturation-Mutagenesis	-0.514	69.1116	-2.392	Neutral	0.944099	-18	deleterious	-1.822	-3.255	102.348	0.211056	0.535055	9.72514	0.0348965	0.612219	DNA-PKCS_A1650L
DNA-PKCS	3	missense	A1650M	DNA-PKCS	1650	1650	A	M	Saturation-Mutagenesis	-0.527	69.1116	-2.059	Neutral	0.944099	-36	deleterious	-1.822	-3.51	102.348	0.211056	0.535055	9.72514	0.0348965	0.612219	DNA-PKCS_A1650M
DNA-PKCS	3	missense	A1650N	DNA-PKCS	1650	1650	A	N	Saturation-Mutagenesis	-0.841	69.1116	-1.69	Neutral	0.944099	0	deleterious	-1.767	-4.065	102.348	0.211056	0.535055	9.72514	0.0348965	0.612219	DNA-PKCS_A1650N
DNA-PKCS	3	missense	A1650P	DNA-PKCS	1650	1650	A	P	Saturation-Mutagenesis	-0.865	69.1116	-1.992	Neutral	0.944099	-33	deleterious	-1.822	-3.308	102.348	0.211056	0.535055	9.72514	0.0348965	0.612219	DNA-PKCS_A1650P
DNA-PKCS	3	missense	A1650Q	DNA-PKCS	1650	1650	A	Q	Saturation-Mutagenesis	-0.841	69.1116	-1.292	Neutral	0.944099	-6	deleterious	-1.822	-5.306	102.348	0.211056	0.535055	9.72514	0.0348965	0.612219	DNA-PKCS_A1650Q
DNA-PKCS	3	missense	A1650R	DNA-PKCS	1650	1650	A	R	Saturation-Mutagenesis	-1.544	69.1116	-1.325	Neutral	0.944099	-8	deleterious	-1.767	-3.914	102.348	0.254515	0.565698	10.2245	0.0384152	0.816309	DNA-PKCS_A1650R
DNA-PKCS	3	missense	A1650S	DNA-PKCS	1650	1650	A	S	Saturation-Mutagenesis	-1.049	69.1116	-0.429	Neutral	0.944099	-5	deleterious	-1.767	-4.612	102.348	0.211056	0.535055	9.72514	0.0348965	0.612219	DNA-PKCS_A1650S
DNA-PKCS	1	missense	A1650T	DNA-PKCS	1650	1650	A	T	Pathogenic	-0.539	69.1116	-1.06	Neutral	0.944099	-4	neutral	-1.767	-2.825	102.348	0.211056	0.535055	9.72514	0.0348965	0.612219	DNA-PKCS_A1650T
DNA-PKCS	3	missense	A1650V	DNA-PKCS	1650	1650	A	V	Saturation-Mutagenesis	-0.402	69.1116	-2.027	Neutral	0.944099	-13	neutral	-1.822	-2.272	102.348	0.211056	0.535055	9.72514	0.0348965	0.612219	DNA-PKCS_A1650V
DNA-PKCS	3	missense	A1650W	DNA-PKCS	1650	1650	A	W	Saturation-Mutagenesis	-0.067	69.1116	-3.522	Deleterious	0.944099	-39	deleterious	-1.822	-5.127	102.348	0.211056	0.535055	9.72514	0.0348965	0.612219	DNA-PKCS_A1650W
DNA-PKCS	3	missense	A1650Y	DNA-PKCS	1650	1650	A	Y	Saturation-Mutagenesis	0.032	69.1116	-2.79	Deleterious	0.944099	-13	neutral	-1.822	-2.271	102.348	0.211056	0.535055	9.72514	0.0348965	0.612219	DNA-PKCS_A1650Y
DNA-PKCS	3	missense	A1680C	DNA-PKCS	1680	1680	A	C	Saturation-Mutagenesis	-1.426	63.0941	-1.491	Neutral	0.813633	-3	deleterious	-1.158	-4.027	95.5879	0.423918	0.922735	14.0375	0.053619	1.38183	DNA-PKCS_A1680C
DNA-PKCS	3	missense	A1680D	DNA-PKCS	1680	1680	A	D	Saturation-Mutagenesis	-1.805	63.0941	-2.09	Neutral	0.813633	-21	deleterious	-1.293	-3.005	95.5879	0.423918	0.922735	14.0375	0.053619	1.38183	DNA-PKCS_A1680D
DNA-PKCS	3	missense	A1680E	DNA-PKCS	1680	1680	A	E	Saturation-Mutagenesis	-1.942	63.0941	-1.808	Neutral	0.813633	45	neutral	-1.293	-2.225	95.5879	0.423918	0.922735	14.0375	0.053619	1.38183	DNA-PKCS_A1680E
DNA-PKCS	3	missense	A1680F	DNA-PKCS	1680	1680	A	F	Saturation-Mutagenesis	0.117	63.0941	-2.803	Deleterious	0.813633	-1	deleterious	-1.158	-4.04	95.5879	0.423918	0.922735	14.0375	0.053619	1.38183	DNA-PKCS_A1680F
DNA-PKCS	3	missense	A1680G	DNA-PKCS	1680	1680	A	G	Saturation-Mutagenesis	-1.426	63.0941	-1.481	Neutral	0.813633	-61	deleterious	-1.158	-4.444	95.5879	0.423918	0.922735	14.0375	0.053619	1.38183	DNA-PKCS_A1680G
DNA-PKCS	3	missense	A1680H	DNA-PKCS	1680	1680	A	H	Saturation-Mutagenesis	-1.502	63.0941	-2.488	Neutral	0.813633	-42	deleterious	-1.293	-3.633	95.5879	0.423918	0.922735	14.0375	0.053619	1.38183	DNA-PKCS_A1680H
DNA-PKCS	3	missense	A1680I	DNA-PKCS	1680	1680	A	I	Saturation-Mutagenesis	-1.387	63.0941	-2.137	Neutral	0.813633	-19	deleterious	-1.158	-3.807	95.5879	0.423918	0.922735	14.0375	0.053619	1.38183	DNA-PKCS_A1680I
DNA-PKCS	3	missense	A1680K	DNA-PKCS	1680	1680	A	K	Saturation-Mutagenesis	-1.719	63.0941	-1.912	Neutral	0.813633	-3	deleterious	-1.293	-3.989	95.5879	0.423918	0.922735	14.0375	0.053619	1.38183	DNA-PKCS_A1680K
DNA-PKCS	3	missense	A1680L	DNA-PKCS	1680	1680	A	L	Saturation-Mutagenesis	-1.663	63.0941	-2.212	Neutral	0.813633	-31	deleterious	-1.158	-3.527	95.5879	0.423918	0.922735	14.0375	0.053619	1.38183	DNA-PKCS_A1680L
DNA-PKCS	3	missense	A1680M	DNA-PKCS	1680	1680	A	M	Saturation-Mutagenesis	-0.613	63.0941	-2.091	Neutral	0.813633	-39	deleterious	-1.158	-3.516	95.5879	0.423918	0.922735	14.0375	0.053619	1.38183	DNA-PKCS_A1680M
DNA-PKCS	3	missense	A1680N	DNA-PKCS	1680	1680	A	N	Saturation-Mutagenesis	-1.247	63.0941	-1.377	Neutral	0.813633	-23	deleterious	-1.293	-2.498	95.5879	0.423918	0.922735	14.0375	0.053619	1.38183	DNA-PKCS_A1680N
DNA-PKCS	3	missense	A1680P	DNA-PKCS	1680	1680	A	P	Saturation-Mutagenesis	-1.536	63.0941	-2.079	Neutral	0.813633	-53	deleterious	-1.158	-3.776	95.5879	0.423918	0.922735	14.0375	0.053619	1.38183	DNA-PKCS_A1680P
DNA-PKCS	3	missense	A1680Q	DNA-PKCS	1680	1680	A	Q	Saturation-Mutagenesis	-1.247	63.0941	-1.878	Neutral	0.813633	17	deleterious	-1.293	-3.739	95.5879	0.423918	0.922735	14.0375	0.053619	1.38183	DNA-PKCS_A1680Q
DNA-PKCS	3	missense	A1680R	DNA-PKCS	1680	1680	A	R	Saturation-Mutagenesis	-2.042	63.0941	-2.049	Neutral	0.813633	-32	deleterious	-1.293	-4.638	95.5879	0.404425	0.835654	13.6091	0.0530661	1.28388	DNA-PKCS_A1680R
DNA-PKCS	3	missense	A1680S	DNA-PKCS	1680	1680	A	S	Saturation-Mutagenesis	-1.943	63.0941	-0.355	Neutral	0.813633	-6	deleterious	-1.293	-2.949	95.5879	0.423918	0.922735	14.0375	0.053619	1.38183	DNA-PKCS_A1680S
DNA-PKCS	3	missense	A1680T	DNA-PKCS	1680	1680	A	T	Saturation-Mutagenesis	-0.758	63.0941	-0.433	Neutral	0.813633	-21	deleterious	-1.293	-3.945	95.5879	0.423918	0.922735	14.0375	0.053619	1.38183	DNA-PKCS_A1680T
DNA-PKCS	2	missense	A1680V	DNA-PKCS	1680	1680	A	V	Non-Pathogenic	-1.349	63.0941	-1.577	Neutral	0.813633	-23	deleterious	-1.158	-3.875	95.5879	0.423918	0.922735	14.0375	0.053619	1.38183	DNA-PKCS_A1680V
DNA-PKCS	3	missense	A1680W	DNA-PKCS	1680	1680	A	W	Saturation-Mutagenesis	-0.417	63.0941	-3.232	Deleterious	0.805456	-28	deleterious	-1.158	-4.732	95.5879	0.423918	0.922735	14.0375	0.053619	1.38183	DNA-PKCS_A1680W
DNA-PKCS	3	missense	A1680Y	DNA-PKCS	1680	1680	A	Y	Saturation-Mutagenesis	-0.439	63.0941	-2.771	Deleterious	0.813633	-30	deleterious	-1.158	-4.219	95.5879	0.423918	0.922735	14.0375	0.053619	1.38183	DNA-PKCS_A1680Y
DNA-PKCS	3	missense	A1692C	DNA-PKCS	1692	1692	A	C	Saturation-Mutagenesis	-1.079	54.5789	-2.32	Neutral	0.797988	14	deleterious	-1.584	-4.014	110.863	0.257086	0.61802	11.3349	0.0415913	0.816368	DNA-PKCS_A1692C
DNA-PKCS	3	missense	A1692D	DNA-PKCS	1692	1692	A	D	Saturation-Mutagenesis	-1.379	54.5789	-3.847	Deleterious	0.797988	-18	neutral	-1.584	-2.601	110.863	0.257086	0.61802	11.3349	0.0415913	0.816368	DNA-PKCS_A1692D
DNA-PKCS	3	missense	A1692E	DNA-PKCS	1692	1692	A	E	Saturation-Mutagenesis	-1.454	54.5789	-3.117	Deleterious	0.797988	40	neutral	-1.584	-3.355	110.863	0.257086	0.61802	11.3349	0.0415913	0.816368	DNA-PKCS_A1692E
DNA-PKCS	3	missense	A1692F	DNA-PKCS	1692	1692	A	F	Saturation-Mutagenesis	-0.274	54.5789	-3.347	Deleterious	0.797988	39	deleterious	-1.505	-3.63	110.863	0.257086	0.61802	11.3349	0.0415913	0.816368	DNA-PKCS_A1692F
DNA-PKCS	3	missense	A1692G	DNA-PKCS	1692	1692	A	G	Saturation-Mutagenesis	-1.079	54.5789	-2.853	Deleterious	0.797988	20	neutral	-1.584	-2.987	110.863	0.257086	0.61802	11.3349	0.0415913	0.816368	DNA-PKCS_A1692G
DNA-PKCS	3	missense	A1692H	DNA-PKCS	1692	1692	A	H	Saturation-Mutagenesis	-1.004	54.5789	-3.847	Deleterious	0.797988	-20	deleterious	-1.584	-3.915	110.863	0.257086	0.61802	11.3349	0.0415913	0.816368	DNA-PKCS_A1692H
DNA-PKCS	3	missense	A1692I	DNA-PKCS	1692	1692	A	I	Saturation-Mutagenesis	-0.746	54.5789	-1.95	Neutral	0.797988	-4	neutral	-1.584	-2.839	110.863	0.257086	0.61802	11.3349	0.0415913	0.816368	DNA-PKCS_A1692I
DNA-PKCS	3	missense	A1692K	DNA-PKCS	1692	1692	A	K	Saturation-Mutagenesis	-1.194	54.5789	-3.083	Deleterious	0.797988	-2	deleterious	-1.584	-3.78	110.863	0.257086	0.61802	11.3349	0.0415913	0.816368	DNA-PKCS_A1692K
DNA-PKCS	3	missense	A1692L	DNA-PKCS	1692	1692	A	L	Saturation-Mutagenesis	-0.885	54.5789	-2.317	Neutral	0.797988	-9	neutral	-1.584	-3.77	110.863	0.257086	0.61802	11.3349	0.0415913	0.816368	DNA-PKCS_A1692L
DNA-PKCS	3	missense	A1692M	DNA-PKCS	1692	1692	A	M	Saturation-Mutagenesis	-1.554	54.5789	-2.25	Neutral	0.797988	54	deleterious	-1.584	-4.016	110.863	0.257086	0.61802	11.3349	0.0415913	0.816368	DNA-PKCS_A1692M
DNA-PKCS	3	missense	A1692N	DNA-PKCS	1692	1692	A	N	Saturation-Mutagenesis	-0.94	54.5789	-3.78	Deleterious	0.797988	20	neutral	-1.584	-2.873	110.863	0.257086	0.61802	11.3349	0.0415913	0.816368	DNA-PKCS_A1692N
DNA-PKCS	3	missense	A1692P	DNA-PKCS	1692	1692	A	P	Saturation-Mutagenesis	-1.018	54.5789	-3.117	Deleterious	0.797988	-14	neutral	-1.584	-2.102	110.863	0.257086	0.61802	11.3349	0.0415913	0.816368	DNA-PKCS_A1692P
DNA-PKCS	3	missense	A1692Q	DNA-PKCS	1692	1692	A	Q	Saturation-Mutagenesis	-0.94	54.5789	-2.95	Deleterious	0.797988	56	neutral	-1.584	-3.612	110.863	0.257086	0.61802	11.3349	0.0415913	0.816368	DNA-PKCS_A1692Q
DNA-PKCS	3	missense	A1692R	DNA-PKCS	1692	1692	A	R	Saturation-Mutagenesis	-1.479	54.5789	-3.25	Deleterious	0.797988	-16	neutral	-1.584	-3.681	110.863	0.235874	0.691476	10.8845	0.0346164	0.849105	DNA-PKCS_A1692R
DNA-PKCS	3	missense	A1692S	DNA-PKCS	1692	1692	A	S	Saturation-Mutagenesis	-1.301	54.5789	-1.923	Neutral	0.797988	26	deleterious	-1.584	-3.984	110.863	0.257086	0.61802	11.3349	0.0415913	0.816368	DNA-PKCS_A1692S
DNA-PKCS	3	missense	A1692T	DNA-PKCS	1692	1692	A	T	Saturation-Mutagenesis	-0.56	54.5789	-1.953	Neutral	0.797988	3	neutral	-1.584	-4.09	110.863	0.257086	0.61802	11.3349	0.0415913	0.816368	DNA-PKCS_A1692T
DNA-PKCS	3	missense	A1692V	DNA-PKCS	1692	1692	A	V	Saturation-Mutagenesis	-0.702	54.5789	-1.253	Neutral	0.797988	27	neutral	-1.584	-2.196	110.863	0.257086	0.61802	11.3349	0.0415913	0.816368	DNA-PKCS_A1692V
DNA-PKCS	3	missense	A1692W	DNA-PKCS	1692	1692	A	W	Saturation-Mutagenesis	-0.874	54.5789	-4.343	Deleterious	0.821452	-54	deleterious	-1.505	-3.242	110.863	0.257086	0.61802	11.3349	0.0415913	0.816368	DNA-PKCS_A1692W
DNA-PKCS	3	missense	A1692Y	DNA-PKCS	1692	1692	A	Y	Saturation-Mutagenesis	-1.389	54.5789	-3.413	Deleterious	0.797988	18	deleterious	-1.505	-4.285	110.863	0.257086	0.61802	11.3349	0.0415913	0.816368	DNA-PKCS_A1692Y
DNA-PKCS	3	missense	A1720C	DNA-PKCS	1720	1720	A	C	Saturation-Mutagenesis	-0.297	57.564	-0.785	Neutral	0.79842	17	deleterious	-1.403	-3.732	83.8131	0.207451	0.482082	9.96605	0.0365037	0.588321	DNA-PKCS_A1720C
DNA-PKCS	3	missense	A1720D	DNA-PKCS	1720	1720	A	D	Saturation-Mutagenesis	-0.103	57.564	-0.741	Neutral	0.79842	49	deleterious	-1.362	-2.183	83.8131	0.207451	0.482082	9.96605	0.0365037	0.588321	DNA-PKCS_A1720D
DNA-PKCS	3	missense	A1720E	DNA-PKCS	1720	1720	A	E	Saturation-Mutagenesis	0.08	57.564	-0.738	Neutral	0.79842	77	deleterious	-1.362	-4.182	83.8131	0.207451	0.482082	9.96605	0.0365037	0.588321	DNA-PKCS_A1720E
DNA-PKCS	3	missense	A1720F	DNA-PKCS	1720	1720	A	F	Saturation-Mutagenesis	-0.695	57.564	-0.895	Neutral	0.79842	50	deleterious	-1.403	-4.826	83.8131	0.207451	0.482082	9.96605	0.0365037	0.588321	DNA-PKCS_A1720F
DNA-PKCS	3	missense	A1720G	DNA-PKCS	1720	1720	A	G	Saturation-Mutagenesis	-0.297	57.564	-1.112	Neutral	0.79842	4	deleterious	-1.403	-2.466	83.8131	0.207451	0.482082	9.96605	0.0365037	0.588321	DNA-PKCS_A1720G
DNA-PKCS	3	missense	A1720H	DNA-PKCS	1720	1720	A	H	Saturation-Mutagenesis	0.02	57.564	-0.854	Neutral	0.79842	57	deleterious	-1.362	-2.984	83.8131	0.207451	0.482082	9.96605	0.0365037	0.588321	DNA-PKCS_A1720H
DNA-PKCS	3	missense	A1720I	DNA-PKCS	1720	1720	A	I	Saturation-Mutagenesis	0.458	57.564	-1.126	Neutral	0.79842	51	deleterious	-1.403	-3.546	83.8131	0.207451	0.482082	9.96605	0.0365037	0.588321	DNA-PKCS_A1720I
DNA-PKCS	3	missense	A1720K	DNA-PKCS	1720	1720	A	K	Saturation-Mutagenesis	0.027	57.564	-0.869	Neutral	0.79842	60	deleterious	-1.362	-2.154	83.8131	0.207451	0.482082	9.96605	0.0365037	0.588321	DNA-PKCS_A1720K
DNA-PKCS	3	missense	A1720L	DNA-PKCS	1720	1720	A	L	Saturation-Mutagenesis	0.507	57.564	-1.003	Neutral	0.79842	34	deleterious	-1.403	-3.87	83.8131	0.207451	0.482082	9.96605	0.0365037	0.588321	DNA-PKCS_A1720L
DNA-PKCS	3	missense	A1720M	DNA-PKCS	1720	1720	A	M	Saturation-Mutagenesis	-1.437	57.564	-0.815	Neutral	0.79842	38	deleterious	-1.403	-4.087	83.8131	0.207451	0.482082	9.96605	0.0365037	0.588321	DNA-PKCS_A1720M
DNA-PKCS	3	missense	A1720N	DNA-PKCS	1720	1720	A	N	Saturation-Mutagenesis	-0.34	57.564	-0.468	Neutral	0.79842	27	deleterious	-1.403	-4.024	83.8131	0.207451	0.482082	9.96605	0.0365037	0.588321	DNA-PKCS_A1720N
DNA-PKCS	3	missense	A1720P	DNA-PKCS	1720	1720	A	P	Saturation-Mutagenesis	0.312	57.564	-1.444	Neutral	0.79842	30	deleterious	-1.403	-3.566	83.8131	0.207451	0.482082	9.96605	0.0365037	0.588321	DNA-PKCS_A1720P
DNA-PKCS	3	missense	A1720Q	DNA-PKCS	1720	1720	A	Q	Saturation-Mutagenesis	-0.34	57.564	-0.503	Neutral	0.79842	-12	deleterious	-1.403	-4.341	83.8131	0.207451	0.482082	9.96605	0.0365037	0.588321	DNA-PKCS_A1720Q
DNA-PKCS	3	missense	A1720R	DNA-PKCS	1720	1720	A	R	Saturation-Mutagenesis	0.097	57.564	-1.181	Neutral	0.79842	57	deleterious	-1.362	-2.738	83.8131	0.191551	0.488533	9.78803	0.0346947	0.559106	DNA-PKCS_A1720R
DNA-PKCS	3	missense	A1720S	DNA-PKCS	1720	1720	A	S	Saturation-Mutagenesis	0.525	57.564	0.688	Neutral	0.79842	39	deleterious	-1.362	-3.819	83.8131	0.207451	0.482082	9.96605	0.0365037	0.588321	DNA-PKCS_A1720S
DNA-PKCS	3	missense	A1720T	DNA-PKCS	1720	1720	A	T	Saturation-Mutagenesis	-0.488	57.564	-0.199	Neutral	0.79842	40	deleterious	-1.362	-4.023	83.8131	0.207451	0.482082	9.96605	0.0365037	0.588321	DNA-PKCS_A1720T
DNA-PKCS	3	missense	A1720V	DNA-PKCS	1720	1720	A	V	Saturation-Mutagenesis	0.449	57.564	-1.108	Neutral	0.79842	30	deleterious	-1.403	-3.502	83.8131	0.207451	0.482082	9.96605	0.0365037	0.588321	DNA-PKCS_A1720V
DNA-PKCS	3	missense	A1720W	DNA-PKCS	1720	1720	A	W	Saturation-Mutagenesis	-1.012	57.564	-1.72	Neutral	0.843602	60	deleterious	-1.403	-4.105	83.8131	0.207451	0.482082	9.96605	0.0365037	0.588321	DNA-PKCS_A1720W
DNA-PKCS	3	missense	A1720Y	DNA-PKCS	1720	1720	A	Y	Saturation-Mutagenesis	-1.007	57.564	-0.562	Neutral	0.79842	55	deleterious	-1.403	-3.502	83.8131	0.207451	0.482082	9.96605	0.0365037	0.588321	DNA-PKCS_A1720Y
DNA-PKCS	3	missense	A1749C	DNA-PKCS	1749	1749	A	C	Saturation-Mutagenesis	-0.919	48.2254	-2.187	Neutral	0.946481	6	deleterious	-1.298	-3.989	89.3016	0	0	0	0	0	DNA-PKCS_A1749C
DNA-PKCS	3	missense	A1749D	DNA-PKCS	1749	1749	A	D	Saturation-Mutagenesis	-1.077	48.2254	-3.513	Deleterious	0.946481	-45	deleterious	-1.298	-3.483	89.3016	0	0	0	0	0	DNA-PKCS_A1749D
DNA-PKCS	1	missense	A1749E	DNA-PKCS	1749	1749	A	E	Pathogenic	-1.112	48.2254	-3.017	Deleterious	0.946481	-4	deleterious	-1.298	-3.968	89.3016	0	0	0	0	0	DNA-PKCS_A1749E
DNA-PKCS	3	missense	A1749F	DNA-PKCS	1749	1749	A	F	Saturation-Mutagenesis	-0.575	48.2254	-3.824	Deleterious	0.946481	34	deleterious	-1.298	-3.945	89.3016	0	0	0	0	0	DNA-PKCS_A1749F
DNA-PKCS	3	missense	A1749G	DNA-PKCS	1749	1749	A	G	Saturation-Mutagenesis	-0.919	48.2254	-2.542	Deleterious	0.946481	11	deleterious	-1.298	-4.695	89.3016	0	0	0	0	0	DNA-PKCS_A1749G
DNA-PKCS	3	missense	A1749H	DNA-PKCS	1749	1749	A	H	Saturation-Mutagenesis	-0.706	48.2254	-3.68	Deleterious	0.946481	-12	deleterious	-1.298	-2.582	89.3016	0	0	0	0	0	DNA-PKCS_A1749H
DNA-PKCS	3	missense	A1749I	DNA-PKCS	1749	1749	A	I	Saturation-Mutagenesis	-0.434	48.2254	-3.094	Deleterious	0.946481	-14	deleterious	-1.298	-3.041	89.3016	0	0	0	0	0	DNA-PKCS_A1749I
DNA-PKCS	3	missense	A1749K	DNA-PKCS	1749	1749	A	K	Saturation-Mutagenesis	-0.861	48.2254	-2.983	Deleterious	0.946481	-31	deleterious	-1.298	-4.673	89.3016	0	0	0	0	0	DNA-PKCS_A1749K
DNA-PKCS	3	missense	A1749L	DNA-PKCS	1749	1749	A	L	Saturation-Mutagenesis	-0.516	48.2254	-3.117	Deleterious	0.946481	-21	neutral	-1.298	-2.257	89.3016	0	0	0	0	0	DNA-PKCS_A1749L
DNA-PKCS	3	missense	A1749M	DNA-PKCS	1749	1749	A	M	Saturation-Mutagenesis	-1.923	48.2254	-3.017	Deleterious	0.946481	48	deleterious	-1.298	-2.979	89.3016	0	0	0	0	0	DNA-PKCS_A1749M
DNA-PKCS	3	missense	A1749N	DNA-PKCS	1749	1749	A	N	Saturation-Mutagenesis	-0.818	48.2254	-3.18	Deleterious	0.946481	19	deleterious	-1.298	-3.385	89.3016	0	0	0	0	0	DNA-PKCS_A1749N
DNA-PKCS	3	missense	A1749P	DNA-PKCS	1749	1749	A	P	Saturation-Mutagenesis	-0.815	48.2254	-3.117	Deleterious	0.946481	-22	deleterious	-1.298	-3.633	89.3016	0	0	0	0	0	DNA-PKCS_A1749P
DNA-PKCS	3	missense	A1749Q	DNA-PKCS	1749	1749	A	Q	Saturation-Mutagenesis	-0.818	48.2254	-2.983	Deleterious	0.946481	50	deleterious	-1.298	-3.962	89.3016	0	0	0	0	0	DNA-PKCS_A1749Q
DNA-PKCS	3	missense	A1749R	DNA-PKCS	1749	1749	A	R	Saturation-Mutagenesis	-1.186	48.2254	-3.061	Deleterious	0.946481	-30	neutral	-2.098	-3.906	89.3016	0	0	0	0	0	DNA-PKCS_A1749R
DNA-PKCS	3	missense	A1749S	DNA-PKCS	1749	1749	A	S	Saturation-Mutagenesis	-0.955	48.2254	-1.312	Neutral	0.946481	26	deleterious	-1.298	-3.696	89.3016	0	0	0	0	0	DNA-PKCS_A1749S
DNA-PKCS	3	missense	A1749T	DNA-PKCS	1749	1749	A	T	Saturation-Mutagenesis	-0.547	48.2254	-1.676	Neutral	0.946481	-3	deleterious	-1.298	-3.545	89.3016	0	0	0	0	0	DNA-PKCS_A1749T
DNA-PKCS	3	missense	A1749V	DNA-PKCS	1749	1749	A	V	Saturation-Mutagenesis	-0.421	48.2254	-2.431	Neutral	0.946481	18	deleterious	-1.298	-4.032	89.3016	0	0	0	0	0	DNA-PKCS_A1749V
DNA-PKCS	3	missense	A1749W	DNA-PKCS	1749	1749	A	W	Saturation-Mutagenesis	-1.057	48.2254	-4.499	Deleterious	0.946481	-61	deleterious	-1.298	-3.739	89.3016	0	0	0	0	0	DNA-PKCS_A1749W
DNA-PKCS	3	missense	A1749Y	DNA-PKCS	1749	1749	A	Y	Saturation-Mutagenesis	-1.73	48.2254	-3.791	Deleterious	0.946481	10	neutral	-1.298	-2.504	89.3016	0	0	0	0	0	DNA-PKCS_A1749Y
DNA-PKCS	3	missense	A1891C	DNA-PKCS	1891	1891	A	C	Saturation-Mutagenesis	-0.602	33.2055	-1.372	Neutral	0.724231	-21	deleterious	-1.191	-2.293	102.776	0	0	0	0	0	DNA-PKCS_A1891C
DNA-PKCS	3	missense	A1891D	DNA-PKCS	1891	1891	A	D	Saturation-Mutagenesis	-0.511	33.2055	-0.936	Neutral	0.724231	50	deleterious	-1.191	-3.788	102.776	0	0	0	0	0	DNA-PKCS_A1891D
DNA-PKCS	3	missense	A1891E	DNA-PKCS	1891	1891	A	E	Saturation-Mutagenesis	-0.412	33.2055	-0.688	Neutral	0.724231	6	deleterious	-1.191	-4.76	102.776	0	0	0	0	0	DNA-PKCS_A1891E
DNA-PKCS	3	missense	A1891F	DNA-PKCS	1891	1891	A	F	Saturation-Mutagenesis	-0.315	33.2055	-1.633	Neutral	0.724231	-21	deleterious	-1.191	-2.828	102.776	0	0	0	0	0	DNA-PKCS_A1891F
DNA-PKCS	3	missense	A1891G	DNA-PKCS	1891	1891	A	G	Saturation-Mutagenesis	-0.602	33.2055	-0.274	Neutral	0.724231	48	deleterious	-1.191	-3.871	102.776	0	0	0	0	0	DNA-PKCS_A1891G
DNA-PKCS	3	missense	A1891H	DNA-PKCS	1891	1891	A	H	Saturation-Mutagenesis	-0.29	33.2055	-1.418	Neutral	0.724231	-3	deleterious	-1.481	-4.069	102.776	0	0	0	0	0	DNA-PKCS_A1891H
DNA-PKCS	3	missense	A1891I	DNA-PKCS	1891	1891	A	I	Saturation-Mutagenesis	0.046	33.2055	-1.685	Neutral	0.724231	-61	deleterious	-1.191	-3.615	102.776	0	0	0	0	0	DNA-PKCS_A1891I
DNA-PKCS	3	missense	A1891K	DNA-PKCS	1891	1891	A	K	Saturation-Mutagenesis	-0.348	33.2055	-0.688	Neutral	0.724231	19	deleterious	-1.481	-4.135	102.776	0	0	0	0	0	DNA-PKCS_A1891K
DNA-PKCS	3	missense	A1891L	DNA-PKCS	1891	1891	A	L	Saturation-Mutagenesis	0.075	33.2055	-1.819	Neutral	0.724231	-76	deleterious	-1.191	-3.911	102.776	0	0	0	0	0	DNA-PKCS_A1891L
DNA-PKCS	3	missense	A1891M	DNA-PKCS	1891	1891	A	M	Saturation-Mutagenesis	-0.611	33.2055	-1.437	Neutral	0.724231	-79	deleterious	-1.191	-2.974	102.776	0	0	0	0	0	DNA-PKCS_A1891M
DNA-PKCS	3	missense	A1891N	DNA-PKCS	1891	1891	A	N	Saturation-Mutagenesis	-0.592	33.2055	-0.488	Neutral	0.724231	18	deleterious	-1.191	-3.696	102.776	0	0	0	0	0	DNA-PKCS_A1891N
DNA-PKCS	3	missense	A1891P	DNA-PKCS	1891	1891	A	P	Saturation-Mutagenesis	-0.179	33.2055	-1.47	Neutral	0.724231	34	deleterious	-1.191	-3.931	102.776	0	0	0	0	0	DNA-PKCS_A1891P
DNA-PKCS	3	missense	A1891Q	DNA-PKCS	1891	1891	A	Q	Saturation-Mutagenesis	-0.592	33.2055	-0.922	Neutral	0.724231	-14	deleterious	-1.191	-3.359	102.776	0	0	0	0	0	DNA-PKCS_A1891Q
DNA-PKCS	3	missense	A1891R	DNA-PKCS	1891	1891	A	R	Saturation-Mutagenesis	-0.313	33.2055	-1.204	Neutral	0.724231	26	deleterious	-1.481	-4.459	102.776	0	0	0	0	0	DNA-PKCS_A1891R
DNA-PKCS	3	missense	A1891S	DNA-PKCS	1891	1891	A	S	Saturation-Mutagenesis	-0.096	33.2055	0.968	Neutral	0.724231	11	deleterious	-1.191	-3.537	102.776	0	0	0	0	0	DNA-PKCS_A1891S
DNA-PKCS	3	missense	A1891T	DNA-PKCS	1891	1891	A	T	Saturation-Mutagenesis	-0.571	33.2055	-0.092	Neutral	0.724231	-22	deleterious	-1.191	-3.892	102.776	0	0	0	0	0	DNA-PKCS_A1891T
DNA-PKCS	3	missense	A1891V	DNA-PKCS	1891	1891	A	V	Saturation-Mutagenesis	0.041	33.2055	-1.571	Neutral	0.724231	10	deleterious	-1.191	-4.576	102.776	0	0	0	0	0	DNA-PKCS_A1891V
DNA-PKCS	3	missense	A1891W	DNA-PKCS	1891	1891	A	W	Saturation-Mutagenesis	-0.108	33.2055	-2.23	Neutral	0.652913	42	deleterious	-1.191	-2.594	102.776	0	0	0	0	0	DNA-PKCS_A1891W
DNA-PKCS	3	missense	A1891Y	DNA-PKCS	1891	1891	A	Y	Saturation-Mutagenesis	-0.097	33.2055	-1.6	Neutral	0.724231	-13	deleterious	-1.191	-2.951	102.776	0	0	0	0	0	DNA-PKCS_A1891Y
DNA-PKCS	3	missense	A1922C	DNA-PKCS	1922	1922	A	C	Saturation-Mutagenesis	-0.871	29.619	-2.486	Neutral	0.760007	58	deleterious	-1.657	-4.041	106.991	0	0	0	0	0	DNA-PKCS_A1922C
DNA-PKCS	3	missense	A1922D	DNA-PKCS	1922	1922	A	D	Saturation-Mutagenesis	-1.092	29.619	-3.846	Deleterious	0.760007	18	neutral	-1.657	-2.254	106.991	0	0	0	0	0	DNA-PKCS_A1922D
DNA-PKCS	1	missense	A1922E	DNA-PKCS	1922	1922	A	E	Pathogenic	-1.125	29.619	-3.316	Deleterious	0.760007	36	deleterious	-1.657	-3.066	106.991	0	0	0	0	0	DNA-PKCS_A1922E
DNA-PKCS	3	missense	A1922F	DNA-PKCS	1922	1922	A	F	Saturation-Mutagenesis	-0.113	29.619	-4.179	Deleterious	0.760007	-62	deleterious	-1.563	-2.446	106.991	0	0	0	0	0	DNA-PKCS_A1922F
DNA-PKCS	3	missense	A1922G	DNA-PKCS	1922	1922	A	G	Saturation-Mutagenesis	-0.871	29.619	-2.819	Deleterious	0.760007	55	deleterious	-1.563	-2.505	106.991	0	0	0	0	0	DNA-PKCS_A1922G
DNA-PKCS	3	missense	A1922H	DNA-PKCS	1922	1922	A	H	Saturation-Mutagenesis	-0.663	29.619	-3.846	Deleterious	0.760007	6	deleterious	-1.657	-3.414	106.991	0	0	0	0	0	DNA-PKCS_A1922H
DNA-PKCS	3	missense	A1922I	DNA-PKCS	1922	1922	A	I	Saturation-Mutagenesis	-0.379	29.619	-3.482	Deleterious	0.760007	82	deleterious	-1.563	-3.481	106.991	0	0	0	0	0	DNA-PKCS_A1922I
DNA-PKCS	3	missense	A1922K	DNA-PKCS	1922	1922	A	K	Saturation-Mutagenesis	-0.815	29.619	-3.316	Deleterious	0.760007	10	deleterious	-1.657	-3.911	106.991	0	0	0	0	0	DNA-PKCS_A1922K
DNA-PKCS	3	missense	A1922L	DNA-PKCS	1922	1922	A	L	Saturation-Mutagenesis	-0.503	29.619	-3.482	Deleterious	0.760007	-59	deleterious	-1.563	-3.082	106.991	0	0	0	0	0	DNA-PKCS_A1922L
DNA-PKCS	3	missense	A1922M	DNA-PKCS	1922	1922	A	M	Saturation-Mutagenesis	-1.484	29.619	-3.416	Deleterious	0.760007	-62	deleterious	-1.563	-3.229	106.991	0	0	0	0	0	DNA-PKCS_A1922M
DNA-PKCS	3	missense	A1922N	DNA-PKCS	1922	1922	A	N	Saturation-Mutagenesis	-0.746	29.619	-3.879	Deleterious	0.760007	45	deleterious	-1.657	-4.159	106.991	0	0	0	0	0	DNA-PKCS_A1922N
DNA-PKCS	3	missense	A1922P	DNA-PKCS	1922	1922	A	P	Saturation-Mutagenesis	-0.582	29.619	-3.449	Deleterious	0.760007	64	deleterious	-1.563	-4.399	106.991	0	0	0	0	0	DNA-PKCS_A1922P
DNA-PKCS	3	missense	A1922Q	DNA-PKCS	1922	1922	A	Q	Saturation-Mutagenesis	-0.746	29.619	-3.349	Deleterious	0.760007	54	deleterious	-1.657	-3.906	106.991	0	0	0	0	0	DNA-PKCS_A1922Q
DNA-PKCS	3	missense	A1922R	DNA-PKCS	1922	1922	A	R	Saturation-Mutagenesis	-1.562	29.619	-3.216	Deleterious	0.760007	-10	deleterious	-1.657	-4.748	106.991	0	0	0	0	0	DNA-PKCS_A1922R
DNA-PKCS	3	missense	A1922S	DNA-PKCS	1922	1922	A	S	Saturation-Mutagenesis	-0.699	29.619	-1.856	Neutral	0.760007	44	deleterious	-1.657	-2.465	106.991	0	0	0	0	0	DNA-PKCS_A1922S
DNA-PKCS	3	missense	A1922T	DNA-PKCS	1922	1922	A	T	Saturation-Mutagenesis	-0.425	29.619	-2.319	Neutral	0.760007	15	neutral	-1.657	-1.826	106.991	0	0	0	0	0	DNA-PKCS_A1922T
DNA-PKCS	3	missense	A1922V	DNA-PKCS	1922	1922	A	V	Saturation-Mutagenesis	-0.367	29.619	-2.753	Deleterious	0.760007	57	deleterious	-1.563	-3.139	106.991	0	0	0	0	0	DNA-PKCS_A1922V
DNA-PKCS	3	missense	A1922W	DNA-PKCS	1922	1922	A	W	Saturation-Mutagenesis	-0.875	29.619	-4.909	Deleterious	0.737143	-61	deleterious	-1.563	-4.889	106.991	0	0	0	0	0	DNA-PKCS_A1922W
DNA-PKCS	3	missense	A1922Y	DNA-PKCS	1922	1922	A	Y	Saturation-Mutagenesis	-1.347	29.619	-4.079	Deleterious	0.760007	-39	deleterious	-1.563	-3.564	106.991	0	0	0	0	0	DNA-PKCS_A1922Y
DNA-PKCS	3	missense	A1928C	DNA-PKCS	1928	1928	A	C	Saturation-Mutagenesis	-0.152	25.5345	-1.698	Neutral	0.767164	-65	deleterious	-1.343	-3.263	101.872	0	0	0	0	0	DNA-PKCS_A1928C
DNA-PKCS	3	missense	A1928D	DNA-PKCS	1928	1928	A	D	Saturation-Mutagenesis	0.095	25.5345	-2.758	Deleterious	0.767164	7	deleterious	-1.626	-4.264	101.872	0	0	0	0	0	DNA-PKCS_A1928D
DNA-PKCS	3	missense	A1928E	DNA-PKCS	1928	1928	A	E	Saturation-Mutagenesis	0.282	25.5345	-2.195	Neutral	0.767164	2	deleterious	-1.626	-4.128	101.872	0	0	0	0	0	DNA-PKCS_A1928E
DNA-PKCS	3	missense	A1928F	DNA-PKCS	1928	1928	A	F	Saturation-Mutagenesis	0.58	25.5345	-2.911	Deleterious	0.767164	-18	deleterious	-1.343	-3.088	101.872	0	0	0	0	0	DNA-PKCS_A1928F
DNA-PKCS	3	missense	A1928G	DNA-PKCS	1928	1928	A	G	Saturation-Mutagenesis	-0.152	25.5345	-2.279	Neutral	0.767164	-72	deleterious	-1.343	-3.351	101.872	0	0	0	0	0	DNA-PKCS_A1928G
DNA-PKCS	3	missense	A1928H	DNA-PKCS	1928	1928	A	H	Saturation-Mutagenesis	0.195	25.5345	-2.558	Deleterious	0.767164	-4	deleterious	-1.626	-3.681	101.872	0	0	0	0	0	DNA-PKCS_A1928H
DNA-PKCS	3	missense	A1928I	DNA-PKCS	1928	1928	A	I	Saturation-Mutagenesis	0.614	25.5345	-2.06	Neutral	0.767164	48	deleterious	-1.343	-4.983	101.872	0	0	0	0	0	DNA-PKCS_A1928I
DNA-PKCS	3	missense	A1928K	DNA-PKCS	1928	1928	A	K	Saturation-Mutagenesis	0.209	25.5345	-1.928	Neutral	0.767164	38	deleterious	-1.626	-4.803	101.872	0	0	0	0	0	DNA-PKCS_A1928K
DNA-PKCS	3	missense	A1928L	DNA-PKCS	1928	1928	A	L	Saturation-Mutagenesis	0.665	25.5345	-2.04	Neutral	0.767164	-9	deleterious	-1.343	-3.236	101.872	0	0	0	0	0	DNA-PKCS_A1928L
DNA-PKCS	3	missense	A1928M	DNA-PKCS	1928	1928	A	M	Saturation-Mutagenesis	-0.408	25.5345	-2.007	Neutral	0.767164	-14	deleterious	-1.343	-3.883	101.872	0	0	0	0	0	DNA-PKCS_A1928M
DNA-PKCS	3	missense	A1928N	DNA-PKCS	1928	1928	A	N	Saturation-Mutagenesis	-0.205	25.5345	-2.291	Neutral	0.767164	20	deleterious	-1.343	-3.509	101.872	0	0	0	0	0	DNA-PKCS_A1928N
DNA-PKCS	3	missense	A1928P	DNA-PKCS	1928	1928	A	P	Saturation-Mutagenesis	0.366	25.5345	-2.428	Neutral	0.767164	-17	deleterious	-1.343	-2.335	101.872	0	0	0	0	0	DNA-PKCS_A1928P
DNA-PKCS	3	missense	A1928Q	DNA-PKCS	1928	1928	A	Q	Saturation-Mutagenesis	-0.205	25.5345	-2.095	Neutral	0.767164	-51	deleterious	-1.343	-3.242	101.872	0	0	0	0	0	DNA-PKCS_A1928Q
DNA-PKCS	3	missense	A1928R	DNA-PKCS	1928	1928	A	R	Saturation-Mutagenesis	0.399	25.5345	-1.835	Neutral	0.767164	30	deleterious	-1.626	-4.066	101.872	0	0	0	0	0	DNA-PKCS_A1928R
DNA-PKCS	3	missense	A1928S	DNA-PKCS	1928	1928	A	S	Saturation-Mutagenesis	0.652	25.5345	-1.049	Neutral	0.767164	59	deleterious	-1.343	-4.16	101.872	0	0	0	0	0	DNA-PKCS_A1928S
DNA-PKCS	3	missense	A1928T	DNA-PKCS	1928	1928	A	T	Saturation-Mutagenesis	-0.381	25.5345	-0.558	Neutral	0.767164	51	deleterious	-1.343	-2.918	101.872	0	0	0	0	0	DNA-PKCS_A1928T
DNA-PKCS	2	missense	A1928V	DNA-PKCS	1928	1928	A	V	Non-Pathogenic	0.589	25.5345	-1.496	Neutral	0.767164	-5	deleterious	-1.343	-3.535	101.872	0	0	0	0	0	DNA-PKCS_A1928V
DNA-PKCS	3	missense	A1928W	DNA-PKCS	1928	1928	A	W	Saturation-Mutagenesis	0.287	25.5345	-3.514	Deleterious	0.797586	-7	deleterious	-1.343	-3.795	101.872	0	0	0	0	0	DNA-PKCS_A1928W
DNA-PKCS	3	missense	A1928Y	DNA-PKCS	1928	1928	A	Y	Saturation-Mutagenesis	-0.035	25.5345	-2.744	Deleterious	0.767164	-1	deleterious	-1.343	-3.599	101.872	0	0	0	0	0	DNA-PKCS_A1928Y
DNA-PKCS	3	missense	A193C	DNA-PKCS	193	193	A	C	Saturation-Mutagenesis	-0.474	56.3727	-1.63	Neutral	0.712737	35	deleterious	-1.426	-3.166	117.515	0.389525	0.95037	12.4057	0.0441119	1.12188	DNA-PKCS_A193C
DNA-PKCS	3	missense	A193D	DNA-PKCS	193	193	A	D	Saturation-Mutagenesis	-1.541	56.3727	-1.23	Neutral	0.712737	-26	deleterious	-1.426	-3.079	117.515	0.389525	0.95037	12.4057	0.0441119	1.12188	DNA-PKCS_A193D
DNA-PKCS	3	missense	A193E	DNA-PKCS	193	193	A	E	Saturation-Mutagenesis	-0.891	56.3727	-1.114	Neutral	0.712737	-2	deleterious	-1.426	-2.244	117.515	0.389525	0.95037	12.4057	0.0441119	1.12188	DNA-PKCS_A193E
DNA-PKCS	3	missense	A193F	DNA-PKCS	193	193	A	F	Saturation-Mutagenesis	-1.116	56.3727	-2.328	Neutral	0.712737	38	deleterious	-1.426	-4.157	117.515	0.389525	0.95037	12.4057	0.0441119	1.12188	DNA-PKCS_A193F
DNA-PKCS	3	missense	A193G	DNA-PKCS	193	193	A	G	Saturation-Mutagenesis	-0.966	56.3727	-1.031	Neutral	0.712737	13	deleterious	-1.426	-3.698	117.515	0.389525	0.95037	12.4057	0.0441119	1.12188	DNA-PKCS_A193G
DNA-PKCS	3	missense	A193H	DNA-PKCS	193	193	A	H	Saturation-Mutagenesis	-1.762	56.3727	-1.762	Neutral	0.712737	-24	deleterious	-1.426	-2.058	117.515	0.389525	0.95037	12.4057	0.0441119	1.12188	DNA-PKCS_A193H
DNA-PKCS	3	missense	A193I	DNA-PKCS	193	193	A	I	Saturation-Mutagenesis	-1.143	56.3727	-2.011	Neutral	0.712737	28	deleterious	-1.426	-3.875	117.515	0.389525	0.95037	12.4057	0.0441119	1.12188	DNA-PKCS_A193I
DNA-PKCS	3	missense	A193K	DNA-PKCS	193	193	A	K	Saturation-Mutagenesis	-1.344	56.3727	-0.847	Neutral	0.712737	-28	deleterious	-1.426	-3.457	117.515	0.389525	0.95037	12.4057	0.0441119	1.12188	DNA-PKCS_A193K
DNA-PKCS	3	missense	A193L	DNA-PKCS	193	193	A	L	Saturation-Mutagenesis	-1.258	56.3727	-1.878	Neutral	0.712737	30	deleterious	-1.426	-3.271	117.515	0.389525	0.95037	12.4057	0.0441119	1.12188	DNA-PKCS_A193L
DNA-PKCS	3	missense	A193M	DNA-PKCS	193	193	A	M	Saturation-Mutagenesis	-1.072	56.3727	-1.513	Neutral	0.712737	-4	deleterious	-1.426	-4.393	117.515	0.389525	0.95037	12.4057	0.0441119	1.12188	DNA-PKCS_A193M
DNA-PKCS	3	missense	A193N	DNA-PKCS	193	193	A	N	Saturation-Mutagenesis	-1.443	56.3727	-0.365	Neutral	0.712737	4	deleterious	-1.426	-3.403	117.515	0.389525	0.95037	12.4057	0.0441119	1.12188	DNA-PKCS_A193N
DNA-PKCS	3	missense	A193P	DNA-PKCS	193	193	A	P	Saturation-Mutagenesis	-0.966	56.3727	-1.779	Neutral	0.712737	28	deleterious	-1.426	-2.885	117.515	0.389525	0.95037	12.4057	0.0441119	1.12188	DNA-PKCS_A193P
DNA-PKCS	3	missense	A193Q	DNA-PKCS	193	193	A	Q	Saturation-Mutagenesis	-1.486	56.3727	-1.114	Neutral	0.712737	65	deleterious	-1.426	-4.894	117.515	0.389525	0.95037	12.4057	0.0441119	1.12188	DNA-PKCS_A193Q
DNA-PKCS	3	missense	A193R	DNA-PKCS	193	193	A	R	Saturation-Mutagenesis	-0.405	56.3727	-1.379	Neutral	0.712737	-60	deleterious	-1.426	-4.225	117.515	0.389525	0.95037	12.4057	0.0441119	1.12188	DNA-PKCS_A193R
DNA-PKCS	2	missense	A193S	DNA-PKCS	193	193	A	S	Non-Pathogenic	-1.121	56.3727	1.28	Neutral	0.712737	-24	deleterious	-1.426	-3.229	117.515	0.389525	0.95037	12.4057	0.0441119	1.12188	DNA-PKCS_A193S
DNA-PKCS	3	missense	A193T	DNA-PKCS	193	193	A	T	Saturation-Mutagenesis	-1.299	56.3727	-0.299	Neutral	0.712737	21	deleterious	-1.426	-3.313	117.515	0.389525	0.95037	12.4057	0.0441119	1.12188	DNA-PKCS_A193T
DNA-PKCS	3	missense	A193V	DNA-PKCS	193	193	A	V	Saturation-Mutagenesis	-1.143	56.3727	-1.895	Neutral	0.712737	66	deleterious	-1.426	-3.572	117.515	0.389525	0.95037	12.4057	0.0441119	1.12188	DNA-PKCS_A193V
DNA-PKCS	3	missense	A193W	DNA-PKCS	193	193	A	W	Saturation-Mutagenesis	-0.98	56.3727	-3.11	Deleterious	0.712737	3	deleterious	-1.413	-3.598	117.515	0.389525	0.95037	12.4057	0.0441119	1.12188	DNA-PKCS_A193W
DNA-PKCS	3	missense	A193Y	DNA-PKCS	193	193	A	Y	Saturation-Mutagenesis	-1.405	56.3727	-2.328	Neutral	0.712737	9	deleterious	-1.426	-4.075	117.515	0.389525	0.95037	12.4057	0.0441119	1.12188	DNA-PKCS_A193Y
DNA-PKCS	3	missense	A1943C	DNA-PKCS	1943	1943	A	C	Saturation-Mutagenesis	-0.545	27.4581	-3.019	Deleterious	0.797076	-39	deleterious	-2.284	-3.824	106.058	0	0	0	0	0	DNA-PKCS_A1943C
DNA-PKCS	3	missense	A1943D	DNA-PKCS	1943	1943	A	D	Saturation-Mutagenesis	-0.573	27.4581	-4.19	Deleterious	0.797076	-2	deleterious	-1.095	-3.445	106.058	0	0	0	0	0	DNA-PKCS_A1943D
DNA-PKCS	3	missense	A1943E	DNA-PKCS	1943	1943	A	E	Saturation-Mutagenesis	-0.564	27.4581	-3.505	Deleterious	0.797076	-25	deleterious	-1.095	-3.927	106.058	0	0	0	0	0	DNA-PKCS_A1943E
DNA-PKCS	3	missense	A1943F	DNA-PKCS	1943	1943	A	F	Saturation-Mutagenesis	-0.782	27.4581	-4.401	Deleterious	0.797076	-46	neutral	-2.284	-2.788	106.058	0	0	0	0	0	DNA-PKCS_A1943F
DNA-PKCS	3	missense	A1943G	DNA-PKCS	1943	1943	A	G	Saturation-Mutagenesis	-0.545	27.4581	-2.63	Deleterious	0.797076	-38	deleterious	-2.284	-4.709	106.058	0	0	0	0	0	DNA-PKCS_A1943G
DNA-PKCS	3	missense	A1943H	DNA-PKCS	1943	1943	A	H	Saturation-Mutagenesis	-0.112	27.4581	-4.001	Deleterious	0.797076	12	deleterious	-1.095	-3.571	106.058	0	0	0	0	0	DNA-PKCS_A1943H
DNA-PKCS	3	missense	A1943I	DNA-PKCS	1943	1943	A	I	Saturation-Mutagenesis	0.137	27.4581	-3.805	Deleterious	0.797076	-16	neutral	-2.284	-3.652	106.058	0	0	0	0	0	DNA-PKCS_A1943I
DNA-PKCS	3	missense	A1943K	DNA-PKCS	1943	1943	A	K	Saturation-Mutagenesis	-0.218	27.4581	-3.538	Deleterious	0.797076	37	deleterious	-1.095	-2.995	106.058	0	0	0	0	0	DNA-PKCS_A1943K
DNA-PKCS	3	missense	A1943L	DNA-PKCS	1943	1943	A	L	Saturation-Mutagenesis	0.041	27.4581	-3.805	Deleterious	0.797076	-36	neutral	-2.284	-2.644	106.058	0	0	0	0	0	DNA-PKCS_A1943L
DNA-PKCS	3	missense	A1943M	DNA-PKCS	1943	1943	A	M	Saturation-Mutagenesis	-2.154	27.4581	-3.671	Deleterious	0.797076	-40	neutral	-2.284	-2.627	106.058	0	0	0	0	0	DNA-PKCS_A1943M
DNA-PKCS	3	missense	A1943N	DNA-PKCS	1943	1943	A	N	Saturation-Mutagenesis	-0.471	27.4581	-4.012	Deleterious	0.797076	35	deleterious	-1.095	-4.209	106.058	0	0	0	0	0	DNA-PKCS_A1943N
DNA-PKCS	3	missense	A1943P	DNA-PKCS	1943	1943	A	P	Saturation-Mutagenesis	-0.29	27.4581	-3.638	Deleterious	0.797076	-47	neutral	-2.284	-2.707	106.058	0	0	0	0	0	DNA-PKCS_A1943P
DNA-PKCS	3	missense	A1943Q	DNA-PKCS	1943	1943	A	Q	Saturation-Mutagenesis	-0.471	27.4581	-3.505	Deleterious	0.797076	-20	deleterious	-1.095	-4.079	106.058	0	0	0	0	0	DNA-PKCS_A1943Q
DNA-PKCS	3	missense	A1943R	DNA-PKCS	1943	1943	A	R	Saturation-Mutagenesis	-1.193	27.4581	-3.571	Deleterious	0.797076	25	deleterious	-1.095	-3.275	106.058	0	0	0	0	0	DNA-PKCS_A1943R
DNA-PKCS	2	missense	A1943S	DNA-PKCS	1943	1943	A	S	Non-Pathogenic	-0.172	27.4581	-1.812	Neutral	0.797076	66	deleterious	-1.095	-3.315	106.058	0	0	0	0	0	DNA-PKCS_A1943S
DNA-PKCS	3	missense	A1943T	DNA-PKCS	1943	1943	A	T	Saturation-Mutagenesis	-0.304	27.4581	-2.753	Deleterious	0.797076	56	deleterious	-1.095	-4.436	106.058	0	0	0	0	0	DNA-PKCS_A1943T
DNA-PKCS	3	missense	A1943V	DNA-PKCS	1943	1943	A	V	Saturation-Mutagenesis	0.098	27.4581	-3.075	Deleterious	0.797076	-58	deleterious	-2.284	-3.768	106.058	0	0	0	0	0	DNA-PKCS_A1943V
DNA-PKCS	3	missense	A1943W	DNA-PKCS	1943	1943	A	W	Saturation-Mutagenesis	-1.838	27.4581	-5.153	Deleterious	0.833989	-40	neutral	-2.284	-3.037	106.058	0	0	0	0	0	DNA-PKCS_A1943W
DNA-PKCS	3	missense	A1943Y	DNA-PKCS	1943	1943	A	Y	Saturation-Mutagenesis	-1.857	27.4581	-4.301	Deleterious	0.797076	-36	deleterious	-2.284	-3.959	106.058	0	0	0	0	0	DNA-PKCS_A1943Y
DNA-PKCS	3	missense	A1944C	DNA-PKCS	1944	1944	A	C	Saturation-Mutagenesis	-1.128	30.3819	-3.219	Deleterious	0.833989	18	deleterious	-1.191	-4.744	109.124	0	0	0	0	0	DNA-PKCS_A1944C
DNA-PKCS	3	missense	A1944D	DNA-PKCS	1944	1944	A	D	Saturation-Mutagenesis	-1.322	30.3819	-4.879	Deleterious	0.833989	-20	neutral	-2.284	-3.117	109.124	0	0	0	0	0	DNA-PKCS_A1944D
DNA-PKCS	3	missense	A1944E	DNA-PKCS	1944	1944	A	E	Saturation-Mutagenesis	-1.42	30.3819	-4.049	Deleterious	0.833989	-49	neutral	-2.284	-2.446	109.124	0	0	0	0	0	DNA-PKCS_A1944E
DNA-PKCS	3	missense	A1944F	DNA-PKCS	1944	1944	A	F	Saturation-Mutagenesis	-0.201	30.3819	-4.812	Deleterious	0.833989	55	deleterious	-1.191	-4.157	109.124	0	0	0	0	0	DNA-PKCS_A1944F
DNA-PKCS	3	missense	A1944G	DNA-PKCS	1944	1944	A	G	Saturation-Mutagenesis	-1.128	30.3819	-3.286	Deleterious	0.833989	14	deleterious	-1.191	-3.714	109.124	0	0	0	0	0	DNA-PKCS_A1944G
DNA-PKCS	3	missense	A1944H	DNA-PKCS	1944	1944	A	H	Saturation-Mutagenesis	-0.837	30.3819	-4.879	Deleterious	0.833989	-66	deleterious	-2.284	-4.001	109.124	0	0	0	0	0	DNA-PKCS_A1944H
DNA-PKCS	3	missense	A1944I	DNA-PKCS	1944	1944	A	I	Saturation-Mutagenesis	-0.754	30.3819	-3.882	Deleterious	0.833989	69	deleterious	-1.191	-3.278	109.124	0	0	0	0	0	DNA-PKCS_A1944I
DNA-PKCS	3	missense	A1944K	DNA-PKCS	1944	1944	A	K	Saturation-Mutagenesis	-1.025	30.3819	-4.049	Deleterious	0.833989	-35	neutral	-2.284	-3.12	109.124	0	0	0	0	0	DNA-PKCS_A1944K
DNA-PKCS	3	missense	A1944L	DNA-PKCS	1944	1944	A	L	Saturation-Mutagenesis	-0.97	30.3819	-3.949	Deleterious	0.833989	23	deleterious	-1.191	-3.512	109.124	0	0	0	0	0	DNA-PKCS_A1944L
DNA-PKCS	3	missense	A1944M	DNA-PKCS	1944	1944	A	M	Saturation-Mutagenesis	-1.23	30.3819	-3.949	Deleterious	0.833989	-24	deleterious	-1.191	-3.663	109.124	0	0	0	0	0	DNA-PKCS_A1944M
DNA-PKCS	3	missense	A1944N	DNA-PKCS	1944	1944	A	N	Saturation-Mutagenesis	-0.976	30.3819	-4.879	Deleterious	0.833989	-5	deleterious	-2.284	-4.026	109.124	0	0	0	0	0	DNA-PKCS_A1944N
DNA-PKCS	3	missense	A1944P	DNA-PKCS	1944	1944	A	P	Saturation-Mutagenesis	-1.076	30.3819	-4.049	Deleterious	0.833989	28	deleterious	-1.191	-3.637	109.124	0	0	0	0	0	DNA-PKCS_A1944P
DNA-PKCS	3	missense	A1944Q	DNA-PKCS	1944	1944	A	Q	Saturation-Mutagenesis	-0.976	30.3819	-4.049	Deleterious	0.833989	-11	deleterious	-1.191	-3.965	109.124	0	0	0	0	0	DNA-PKCS_A1944Q
DNA-PKCS	3	missense	A1944R	DNA-PKCS	1944	1944	A	R	Saturation-Mutagenesis	-2.018	30.3819	-4.082	Deleterious	0.833989	-68	neutral	-2.284	-3.502	109.124	0	0	0	0	0	DNA-PKCS_A1944R
DNA-PKCS	3	missense	A1944S	DNA-PKCS	1944	1944	A	S	Saturation-Mutagenesis	-1.209	30.3819	-2.456	Neutral	0.833989	-17	neutral	-2.284	-2.2	109.124	0	0	0	0	0	DNA-PKCS_A1944S
DNA-PKCS	3	missense	A1944T	DNA-PKCS	1944	1944	A	T	Saturation-Mutagenesis	-0.576	30.3819	-3.186	Deleterious	0.833989	-42	deleterious	-2.284	-3.874	109.124	0	0	0	0	0	DNA-PKCS_A1944T
DNA-PKCS	3	missense	A1944V	DNA-PKCS	1944	1944	A	V	Saturation-Mutagenesis	-0.762	30.3819	-3.053	Deleterious	0.833989	7	deleterious	-1.191	-3.755	109.124	0	0	0	0	0	DNA-PKCS_A1944V
DNA-PKCS	3	missense	A1944W	DNA-PKCS	1944	1944	A	W	Saturation-Mutagenesis	-0.893	30.3819	-5.675	Deleterious	0.797076	28	deleterious	-1.191	-3.944	109.124	0	0	0	0	0	DNA-PKCS_A1944W
DNA-PKCS	3	missense	A1944Y	DNA-PKCS	1944	1944	A	Y	Saturation-Mutagenesis	-1.187	30.3819	-4.812	Deleterious	0.833989	52	deleterious	-1.191	-2.723	109.124	0	0	0	0	0	DNA-PKCS_A1944Y
DNA-PKCS	3	missense	A1948C	DNA-PKCS	1948	1948	A	C	Saturation-Mutagenesis	-0.981	29.9721	-1.843	Neutral	0.820988	53	neutral	-2.385	-3.716	111.664	0	0	0	0	0	DNA-PKCS_A1948C
DNA-PKCS	3	missense	A1948D	DNA-PKCS	1948	1948	A	D	Saturation-Mutagenesis	-1.14	29.9721	-3.862	Deleterious	0.820988	-2	deleterious	-1.25	-2.524	111.664	0	0	0	0	0	DNA-PKCS_A1948D
DNA-PKCS	3	missense	A1948E	DNA-PKCS	1948	1948	A	E	Saturation-Mutagenesis	-1.249	29.9721	-3.036	Deleterious	0.820988	26	deleterious	-1.25	-3.795	111.664	0	0	0	0	0	DNA-PKCS_A1948E
DNA-PKCS	3	missense	A1948F	DNA-PKCS	1948	1948	A	F	Saturation-Mutagenesis	-0.272	29.9721	-2.399	Neutral	0.820988	7	neutral	-2.385	-4.001	111.664	0	0	0	0	0	DNA-PKCS_A1948F
DNA-PKCS	3	missense	A1948G	DNA-PKCS	1948	1948	A	G	Saturation-Mutagenesis	-0.981	29.9721	-2.946	Deleterious	0.820988	48	neutral	-2.385	-3.534	111.664	0	0	0	0	0	DNA-PKCS_A1948G
DNA-PKCS	3	missense	A1948H	DNA-PKCS	1948	1948	A	H	Saturation-Mutagenesis	-0.752	29.9721	-3.499	Deleterious	0.820988	-20	deleterious	-1.25	-3.203	111.664	0	0	0	0	0	DNA-PKCS_A1948H
DNA-PKCS	3	missense	A1948I	DNA-PKCS	1948	1948	A	I	Saturation-Mutagenesis	-0.736	29.9721	-1.202	Neutral	0.820988	79	neutral	-2.385	-3.956	111.664	0	0	0	0	0	DNA-PKCS_A1948I
DNA-PKCS	3	missense	A1948K	DNA-PKCS	1948	1948	A	K	Saturation-Mutagenesis	-0.949	29.9721	-2.669	Deleterious	0.820988	-33	deleterious	-1.25	-4.376	111.664	0	0	0	0	0	DNA-PKCS_A1948K
DNA-PKCS	3	missense	A1948L	DNA-PKCS	1948	1948	A	L	Saturation-Mutagenesis	-0.955	29.9721	-0.469	Neutral	0.820988	13	deleterious	-2.385	-4.701	111.664	0	0	0	0	0	DNA-PKCS_A1948L
DNA-PKCS	3	missense	A1948M	DNA-PKCS	1948	1948	A	M	Saturation-Mutagenesis	-1.379	29.9721	-1.202	Neutral	0.820988	-17	neutral	-2.385	-3.673	111.664	0	0	0	0	0	DNA-PKCS_A1948M
DNA-PKCS	3	missense	A1948N	DNA-PKCS	1948	1948	A	N	Saturation-Mutagenesis	-0.839	29.9721	-3.492	Deleterious	0.820988	37	neutral	-2.385	-3.626	111.664	0	0	0	0	0	DNA-PKCS_A1948N
DNA-PKCS	3	missense	A1948P	DNA-PKCS	1948	1948	A	P	Saturation-Mutagenesis	-1.025	29.9721	-3.036	Deleterious	0.820988	60	neutral	-2.385	-3.436	111.664	0	0	0	0	0	DNA-PKCS_A1948P
DNA-PKCS	3	missense	A1948Q	DNA-PKCS	1948	1948	A	Q	Saturation-Mutagenesis	-0.839	29.9721	-2.669	Deleterious	0.820988	48	neutral	-2.385	-3.946	111.664	0	0	0	0	0	DNA-PKCS_A1948Q
DNA-PKCS	3	missense	A1948R	DNA-PKCS	1948	1948	A	R	Saturation-Mutagenesis	-1.433	29.9721	-2.669	Deleterious	0.820988	-30	deleterious	-1.25	-3.795	111.664	0	0	0	0	0	DNA-PKCS_A1948R
DNA-PKCS	3	missense	A1948S	DNA-PKCS	1948	1948	A	S	Saturation-Mutagenesis	-1.259	29.9721	-1.743	Neutral	0.820988	26	neutral	-2.385	-3.865	111.664	0	0	0	0	0	DNA-PKCS_A1948S
DNA-PKCS	2	missense	A1948T	DNA-PKCS	1948	1948	A	T	Non-Pathogenic	-0.447	29.9721	-1.823	Neutral	0.820988	-2	neutral	-2.385	-2.871	111.664	0	0	0	0	0	DNA-PKCS_A1948T
DNA-PKCS	3	missense	A1948V	DNA-PKCS	1948	1948	A	V	Saturation-Mutagenesis	-0.715	29.9721	-1.106	Neutral	0.820988	45	neutral	-2.385	-3.926	111.664	0	0	0	0	0	DNA-PKCS_A1948V
DNA-PKCS	3	missense	A1948W	DNA-PKCS	1948	1948	A	W	Saturation-Mutagenesis	-0.54	29.9721	-3.592	Deleterious	0.795497	-12	neutral	-2.385	-2.28	111.664	0	0	0	0	0	DNA-PKCS_A1948W
DNA-PKCS	3	missense	A1948Y	DNA-PKCS	1948	1948	A	Y	Saturation-Mutagenesis	-1.164	29.9721	-2.766	Deleterious	0.820988	41	neutral	-2.385	-3.093	111.664	0	0	0	0	0	DNA-PKCS_A1948Y
DNA-PKCS	3	missense	A199C	DNA-PKCS	199	199	A	C	Saturation-Mutagenesis	-0.522	61.8447	-1.627	Neutral	0.719618	24	deleterious	-1.423	-2.986	128.371	0.207342	0.536239	10.3826	0.0353718	0.615007	DNA-PKCS_A199C
DNA-PKCS	3	missense	A199D	DNA-PKCS	199	199	A	D	Saturation-Mutagenesis	-1.29	61.8447	-3.157	Deleterious	0.719618	-54	deleterious	-1.423	-4.168	128.371	0.207342	0.536239	10.3826	0.0353718	0.615007	DNA-PKCS_A199D
DNA-PKCS	3	missense	A199E	DNA-PKCS	199	199	A	E	Saturation-Mutagenesis	-0.633	61.8447	-2.609	Deleterious	0.719618	-72	deleterious	-1.423	-4.681	128.371	0.207342	0.536239	10.3826	0.0353718	0.615007	DNA-PKCS_A199E
DNA-PKCS	3	missense	A199F	DNA-PKCS	199	199	A	F	Saturation-Mutagenesis	-0.483	61.8447	-2.124	Neutral	0.719618	24	deleterious	-1.076	-3.993	128.371	0.207342	0.536239	10.3826	0.0353718	0.615007	DNA-PKCS_A199F
DNA-PKCS	3	missense	A199G	DNA-PKCS	199	199	A	G	Saturation-Mutagenesis	-0.851	61.8447	-2.627	Deleterious	0.719618	1	deleterious	-1.423	-2.027	128.371	0.207342	0.536239	10.3826	0.0353718	0.615007	DNA-PKCS_A199G
DNA-PKCS	3	missense	A199H	DNA-PKCS	199	199	A	H	Saturation-Mutagenesis	-1.423	61.8447	-3.124	Deleterious	0.719618	39	deleterious	-1.423	-3.41	128.371	0.207342	0.536239	10.3826	0.0353718	0.615007	DNA-PKCS_A199H
DNA-PKCS	3	missense	A199I	DNA-PKCS	199	199	A	I	Saturation-Mutagenesis	-0.973	61.8447	-0.342	Neutral	0.719618	13	deleterious	-1.076	-3.877	128.371	0.207342	0.536239	10.3826	0.0353718	0.615007	DNA-PKCS_A199I
DNA-PKCS	3	missense	A199K	DNA-PKCS	199	199	A	K	Saturation-Mutagenesis	-1.117	61.8447	-2.575	Deleterious	0.719618	18	deleterious	-1.423	-4.036	128.371	0.207342	0.536239	10.3826	0.0353718	0.615007	DNA-PKCS_A199K
DNA-PKCS	3	missense	A199L	DNA-PKCS	199	199	A	L	Saturation-Mutagenesis	-0.879	61.8447	-0.942	Neutral	0.719618	2	deleterious	-1.076	-4.806	128.371	0.207342	0.536239	10.3826	0.0353718	0.615007	DNA-PKCS_A199L
DNA-PKCS	3	missense	A199M	DNA-PKCS	199	199	A	M	Saturation-Mutagenesis	-0.484	61.8447	-1.242	Neutral	0.719618	-14	deleterious	-1.076	-3.626	128.371	0.207342	0.536239	10.3826	0.0353718	0.615007	DNA-PKCS_A199M
DNA-PKCS	3	missense	A199N	DNA-PKCS	199	199	A	N	Saturation-Mutagenesis	-1.101	61.8447	-3.09	Deleterious	0.719618	-5	deleterious	-1.423	-3.066	128.371	0.207342	0.536239	10.3826	0.0353718	0.615007	DNA-PKCS_A199N
DNA-PKCS	3	missense	A199P	DNA-PKCS	199	199	A	P	Saturation-Mutagenesis	-0.851	61.8447	-2.642	Deleterious	0.719618	9	deleterious	-1.423	-4.019	128.371	0.207342	0.536239	10.3826	0.0353718	0.615007	DNA-PKCS_A199P
DNA-PKCS	3	missense	A199Q	DNA-PKCS	199	199	A	Q	Saturation-Mutagenesis	-0.952	61.8447	-2.609	Deleterious	0.719618	50	deleterious	-1.423	-2.179	128.371	0.207342	0.536239	10.3826	0.0353718	0.615007	DNA-PKCS_A199Q
DNA-PKCS	3	missense	A199R	DNA-PKCS	199	199	A	R	Saturation-Mutagenesis	-0.142	61.8447	-2.709	Deleterious	0.719618	54	deleterious	-1.423	-3.524	128.371	0.207342	0.536239	10.3826	0.0353718	0.615007	DNA-PKCS_A199R
DNA-PKCS	3	missense	A199S	DNA-PKCS	199	199	A	S	Saturation-Mutagenesis	-0.807	61.8447	-1.612	Neutral	0.719618	-75	deleterious	-1.423	-3.536	128.371	0.207342	0.536239	10.3826	0.0353718	0.615007	DNA-PKCS_A199S
DNA-PKCS	2	missense	A199T	DNA-PKCS	199	199	A	T	Non-Pathogenic	-1.038	61.8447	-1.527	Neutral	0.719618	-13	deleterious	-1.423	-4.093	128.371	0.207342	0.536239	10.3826	0.0353718	0.615007	DNA-PKCS_A199T
DNA-PKCS	3	missense	A199V	DNA-PKCS	199	199	A	V	Saturation-Mutagenesis	-0.973	61.8447	-0.127	Neutral	0.719618	49	deleterious	-1.423	-3.215	128.371	0.207342	0.536239	10.3826	0.0353718	0.615007	DNA-PKCS_A199V
DNA-PKCS	3	missense	A199W	DNA-PKCS	199	199	A	W	Saturation-Mutagenesis	-1.262	61.8447	-3.472	Deleterious	0.719618	-19	deleterious	-1.076	-3.512	128.371	0.207342	0.536239	10.3826	0.0353718	0.615007	DNA-PKCS_A199W
DNA-PKCS	3	missense	A199Y	DNA-PKCS	199	199	A	Y	Saturation-Mutagenesis	-0.607	61.8447	-2.39	Neutral	0.719618	-6	deleterious	-1.076	-3.791	128.371	0.207342	0.536239	10.3826	0.0353718	0.615007	DNA-PKCS_A199Y
DNA-PKCS	3	missense	A2011C	DNA-PKCS	2011	2011	A	C	Saturation-Mutagenesis	-0.647	8.90933	-1.948	Neutral	0.780345	-27	deleterious	-1.325	-2.681	112.427	0	0	0	0	0	DNA-PKCS_A2011C
DNA-PKCS	3	missense	A2011D	DNA-PKCS	2011	2011	A	D	Saturation-Mutagenesis	-0.522	8.90933	-2.841	Deleterious	0.780345	15	deleterious	-1.325	-3.516	112.427	0	0	0	0	0	DNA-PKCS_A2011D
DNA-PKCS	3	missense	A2011E	DNA-PKCS	2011	2011	A	E	Saturation-Mutagenesis	-0.464	8.90933	-2.211	Neutral	0.780345	41	deleterious	-1.325	-3.268	112.427	0	0	0	0	0	DNA-PKCS_A2011E
DNA-PKCS	3	missense	A2011F	DNA-PKCS	2011	2011	A	F	Saturation-Mutagenesis	-0.029	8.90933	-2.004	Neutral	0.780345	-27	deleterious	-1.325	-4.579	112.427	0	0	0	0	0	DNA-PKCS_A2011F
DNA-PKCS	3	missense	A2011G	DNA-PKCS	2011	2011	A	G	Saturation-Mutagenesis	-0.647	8.90933	-2.151	Neutral	0.780345	-27	deleterious	-1.325	-3.343	112.427	0	0	0	0	0	DNA-PKCS_A2011G
DNA-PKCS	3	missense	A2011H	DNA-PKCS	2011	2011	A	H	Saturation-Mutagenesis	-0.306	8.90933	-2.941	Deleterious	0.780345	-14	deleterious	-1.325	-2.43	112.427	0	0	0	0	0	DNA-PKCS_A2011H
DNA-PKCS	3	missense	A2011I	DNA-PKCS	2011	2011	A	I	Saturation-Mutagenesis	0.138	8.90933	-1.17	Neutral	0.780345	-22	deleterious	-1.325	-3.618	112.427	0	0	0	0	0	DNA-PKCS_A2011I
DNA-PKCS	3	missense	A2011K	DNA-PKCS	2011	2011	A	K	Saturation-Mutagenesis	-0.37	8.90933	-1.944	Neutral	0.780345	22	deleterious	-1.325	-3.316	112.427	0	0	0	0	0	DNA-PKCS_A2011K
DNA-PKCS	3	missense	A2011L	DNA-PKCS	2011	2011	A	L	Saturation-Mutagenesis	0.15	8.90933	-1.24	Neutral	0.780345	-66	deleterious	-1.325	-3.875	112.427	0	0	0	0	0	DNA-PKCS_A2011L
DNA-PKCS	3	missense	A2011M	DNA-PKCS	2011	2011	A	M	Saturation-Mutagenesis	-0.163	8.90933	-1.273	Neutral	0.780345	-55	deleterious	-1.325	-3.411	112.427	0	0	0	0	0	DNA-PKCS_A2011M
DNA-PKCS	3	missense	A2011N	DNA-PKCS	2011	2011	A	N	Saturation-Mutagenesis	-0.632	8.90933	-2.608	Deleterious	0.780345	30	deleterious	-1.325	-3.312	112.427	0	0	0	0	0	DNA-PKCS_A2011N
DNA-PKCS	3	missense	A2011P	DNA-PKCS	2011	2011	A	P	Saturation-Mutagenesis	-0.248	8.90933	-2.078	Neutral	0.780345	-36	deleterious	-1.325	-3.865	112.427	0	0	0	0	0	DNA-PKCS_A2011P
DNA-PKCS	3	missense	A2011Q	DNA-PKCS	2011	2011	A	Q	Saturation-Mutagenesis	-0.632	8.90933	-2.011	Neutral	0.780345	78	deleterious	-1.325	-3.666	112.427	0	0	0	0	0	DNA-PKCS_A2011Q
DNA-PKCS	3	missense	A2011R	DNA-PKCS	2011	2011	A	R	Saturation-Mutagenesis	-0.619	8.90933	-2.479	Neutral	0.780345	7	neutral	-1.36	-1.865	112.427	0	0	0	0	0	DNA-PKCS_A2011R
DNA-PKCS	3	missense	A2011S	DNA-PKCS	2011	2011	A	S	Saturation-Mutagenesis	-0.196	8.90933	-1.255	Neutral	0.780345	37	deleterious	-1.325	-3.338	112.427	0	0	0	0	0	DNA-PKCS_A2011S
DNA-PKCS	1	missense	A2011T	DNA-PKCS	2011	2011	A	T	Pathogenic	-0.606	8.90933	-1.513	Neutral	0.780345	47	deleterious	-1.325	-3.52	112.427	0	0	0	0	0	DNA-PKCS_A2011T
DNA-PKCS	3	missense	A2011V	DNA-PKCS	2011	2011	A	V	Saturation-Mutagenesis	0.114	8.90933	-0.84	Neutral	0.780345	-20	deleterious	-1.325	-3.131	112.427	0	0	0	0	0	DNA-PKCS_A2011V
DNA-PKCS	3	missense	A2011W	DNA-PKCS	2011	2011	A	W	Saturation-Mutagenesis	-0.113	8.90933	-3.269	Deleterious	0.759062	-34	deleterious	-1.325	-3.427	112.427	0	0	0	0	0	DNA-PKCS_A2011W
DNA-PKCS	3	missense	A2011Y	DNA-PKCS	2011	2011	A	Y	Saturation-Mutagenesis	-0.063	8.90933	-2.338	Neutral	0.780345	-11	deleterious	-1.325	-3.89	112.427	0	0	0	0	0	DNA-PKCS_A2011Y
DNA-PKCS	3	missense	A2014C	DNA-PKCS	2014	2014	A	C	Saturation-Mutagenesis	-0.515	9.23475	-2.009	Neutral	0.747222	-48	deleterious	-1.038	-2.924	106.741	0	0	0	0	0	DNA-PKCS_A2014C
DNA-PKCS	3	missense	A2014D	DNA-PKCS	2014	2014	A	D	Saturation-Mutagenesis	-0.512	9.23475	-2.031	Neutral	0.747222	17	deleterious	-1.038	-3.396	106.741	0	0	0	0	0	DNA-PKCS_A2014D
DNA-PKCS	3	missense	A2014E	DNA-PKCS	2014	2014	A	E	Saturation-Mutagenesis	-0.464	9.23475	-1.56	Neutral	0.747222	22	deleterious	-1.038	-2.952	106.741	0	0	0	0	0	DNA-PKCS_A2014E
DNA-PKCS	3	missense	A2014F	DNA-PKCS	2014	2014	A	F	Saturation-Mutagenesis	-0.033	9.23475	-2.751	Deleterious	0.747222	-63	deleterious	-1.038	-4.032	106.741	0	0	0	0	0	DNA-PKCS_A2014F
DNA-PKCS	3	missense	A2014G	DNA-PKCS	2014	2014	A	G	Saturation-Mutagenesis	-0.515	9.23475	-1.324	Neutral	0.747222	-58	deleterious	-1.038	-3.611	106.741	0	0	0	0	0	DNA-PKCS_A2014G
DNA-PKCS	3	missense	A2014H	DNA-PKCS	2014	2014	A	H	Saturation-Mutagenesis	-0.102	9.23475	-2.554	Deleterious	0.747222	-8	deleterious	-1.038	-3.413	106.741	0	0	0	0	0	DNA-PKCS_A2014H
DNA-PKCS	3	missense	A2014I	DNA-PKCS	2014	2014	A	I	Saturation-Mutagenesis	0.263	9.23475	-2.117	Neutral	0.747222	-48	deleterious	-1.038	-2.946	106.741	0	0	0	0	0	DNA-PKCS_A2014I
DNA-PKCS	3	missense	A2014K	DNA-PKCS	2014	2014	A	K	Saturation-Mutagenesis	-0.189	9.23475	-1.593	Neutral	0.747222	0	deleterious	-1.038	-3.65	106.741	0	0	0	0	0	DNA-PKCS_A2014K
DNA-PKCS	3	missense	A2014L	DNA-PKCS	2014	2014	A	L	Saturation-Mutagenesis	0.232	9.23475	-2.321	Neutral	0.747222	-82	deleterious	-1.038	-4.293	106.741	0	0	0	0	0	DNA-PKCS_A2014L
DNA-PKCS	3	missense	A2014M	DNA-PKCS	2014	2014	A	M	Saturation-Mutagenesis	-1.088	9.23475	-2.188	Neutral	0.747222	-79	deleterious	-1.038	-3.936	106.741	0	0	0	0	0	DNA-PKCS_A2014M
DNA-PKCS	3	missense	A2014N	DNA-PKCS	2014	2014	A	N	Saturation-Mutagenesis	-0.471	9.23475	-1.829	Neutral	0.747222	25	deleterious	-1.038	-3.856	106.741	0	0	0	0	0	DNA-PKCS_A2014N
DNA-PKCS	3	missense	A2014P	DNA-PKCS	2014	2014	A	P	Saturation-Mutagenesis	-0.279	9.23475	-2.128	Neutral	0.747222	-50	deleterious	-1.038	-2.156	106.741	0	0	0	0	0	DNA-PKCS_A2014P
DNA-PKCS	3	missense	A2014Q	DNA-PKCS	2014	2014	A	Q	Saturation-Mutagenesis	-0.471	9.23475	-1.793	Neutral	0.747222	60	deleterious	-1.038	-4.369	106.741	0	0	0	0	0	DNA-PKCS_A2014Q
DNA-PKCS	3	missense	A2014R	DNA-PKCS	2014	2014	A	R	Saturation-Mutagenesis	-0.898	9.23475	-2.061	Neutral	0.747222	26	deleterious	-1.038	-4.636	106.741	0	0	0	0	0	DNA-PKCS_A2014R
DNA-PKCS	3	missense	A2014S	DNA-PKCS	2014	2014	A	S	Saturation-Mutagenesis	-0.13	9.23475	-0.232	Neutral	0.747222	13	deleterious	-1.038	-3.113	106.741	0	0	0	0	0	DNA-PKCS_A2014S
DNA-PKCS	3	missense	A2014T	DNA-PKCS	2014	2014	A	T	Saturation-Mutagenesis	-0.385	9.23475	-0.973	Neutral	0.747222	39	deleterious	-1.038	-3.854	106.741	0	0	0	0	0	DNA-PKCS_A2014T
DNA-PKCS	3	missense	A2014V	DNA-PKCS	2014	2014	A	V	Saturation-Mutagenesis	0.239	9.23475	-1.593	Neutral	0.747222	-30	deleterious	-1.038	-3.23	106.741	0	0	0	0	0	DNA-PKCS_A2014V
DNA-PKCS	3	missense	A2014W	DNA-PKCS	2014	2014	A	W	Saturation-Mutagenesis	-0.723	9.23475	-3.34	Deleterious	0.743505	-55	deleterious	-0.935	-3.689	106.741	0	0	0	0	0	DNA-PKCS_A2014W
DNA-PKCS	3	missense	A2014Y	DNA-PKCS	2014	2014	A	Y	Saturation-Mutagenesis	-0.487	9.23475	-2.853	Deleterious	0.747222	-60	deleterious	-0.935	-3.842	106.741	0	0	0	0	0	DNA-PKCS_A2014Y
DNA-PKCS	3	missense	A2015C	DNA-PKCS	2015	2015	A	C	Saturation-Mutagenesis	-0.122	5.97687	-1.718	Neutral	0.743505	-6	deleterious	-0.935	-4.014	105.072	0	0	0	0	0	DNA-PKCS_A2015C
DNA-PKCS	3	missense	A2015D	DNA-PKCS	2015	2015	A	D	Saturation-Mutagenesis	-0.211	5.97687	-1.861	Neutral	0.743505	-47	deleterious	-0.935	-3.52	105.072	0	0	0	0	0	DNA-PKCS_A2015D
DNA-PKCS	3	missense	A2015E	DNA-PKCS	2015	2015	A	E	Saturation-Mutagenesis	-0.181	5.97687	-1.189	Neutral	0.743505	-33	deleterious	-0.935	-3.555	105.072	0	0	0	0	0	DNA-PKCS_A2015E
DNA-PKCS	3	missense	A2015F	DNA-PKCS	2015	2015	A	F	Saturation-Mutagenesis	0.648	5.97687	-2.203	Neutral	0.743505	-19	deleterious	-1.208	-3.502	105.072	0	0	0	0	0	DNA-PKCS_A2015F
DNA-PKCS	3	missense	A2015G	DNA-PKCS	2015	2015	A	G	Saturation-Mutagenesis	-0.122	5.97687	-1.056	Neutral	0.743505	-31	deleterious	-0.935	-3.212	105.072	0	0	0	0	0	DNA-PKCS_A2015G
DNA-PKCS	3	missense	A2015H	DNA-PKCS	2015	2015	A	H	Saturation-Mutagenesis	0.27	5.97687	-2.163	Neutral	0.743505	-47	deleterious	-0.935	-3.828	105.072	0	0	0	0	0	DNA-PKCS_A2015H
DNA-PKCS	3	missense	A2015I	DNA-PKCS	2015	2015	A	I	Saturation-Mutagenesis	0.39	5.97687	-1.798	Neutral	0.743505	-29	deleterious	-0.935	-3.042	105.072	0	0	0	0	0	DNA-PKCS_A2015I
DNA-PKCS	3	missense	A2015K	DNA-PKCS	2015	2015	A	K	Saturation-Mutagenesis	0.171	5.97687	-1.122	Neutral	0.743505	-50	deleterious	-0.935	-3.574	105.072	0	0	0	0	0	DNA-PKCS_A2015K
DNA-PKCS	3	missense	A2015L	DNA-PKCS	2015	2015	A	L	Saturation-Mutagenesis	0.207	5.97687	-1.649	Neutral	0.743505	-28	deleterious	-0.935	-4.389	105.072	0	0	0	0	0	DNA-PKCS_A2015L
DNA-PKCS	3	missense	A2015M	DNA-PKCS	2015	2015	A	M	Saturation-Mutagenesis	0.163	5.97687	-1.548	Neutral	0.743505	-57	deleterious	-0.935	-2.851	105.072	0	0	0	0	0	DNA-PKCS_A2015M
DNA-PKCS	3	missense	A2015N	DNA-PKCS	2015	2015	A	N	Saturation-Mutagenesis	-0.037	5.97687	-1.515	Neutral	0.743505	-25	deleterious	-0.935	-4.771	105.072	0	0	0	0	0	DNA-PKCS_A2015N
DNA-PKCS	3	missense	A2015P	DNA-PKCS	2015	2015	A	P	Saturation-Mutagenesis	0.144	5.97687	-1.679	Neutral	0.743505	-8	deleterious	-0.935	-3.213	105.072	0	0	0	0	0	DNA-PKCS_A2015P
DNA-PKCS	3	missense	A2015Q	DNA-PKCS	2015	2015	A	Q	Saturation-Mutagenesis	-0.037	5.97687	-1.3	Neutral	0.743505	47	deleterious	-0.935	-3.492	105.072	0	0	0	0	0	DNA-PKCS_A2015Q
DNA-PKCS	3	missense	A2015R	DNA-PKCS	2015	2015	A	R	Saturation-Mutagenesis	-0.849	5.97687	-1.56	Neutral	0.743505	-72	deleterious	-0.935	-3.591	105.072	0	0	0	0	0	DNA-PKCS_A2015R
DNA-PKCS	3	missense	A2015S	DNA-PKCS	2015	2015	A	S	Saturation-Mutagenesis	0.247	5.97687	-0.577	Neutral	0.743505	-44	deleterious	-0.935	-3.807	105.072	0	0	0	0	0	DNA-PKCS_A2015S
DNA-PKCS	3	missense	A2015T	DNA-PKCS	2015	2015	A	T	Saturation-Mutagenesis	0.149	5.97687	-0.6	Neutral	0.743505	-6	deleterious	-0.935	-3.808	105.072	0	0	0	0	0	DNA-PKCS_A2015T
DNA-PKCS	3	missense	A2015V	DNA-PKCS	2015	2015	A	V	Saturation-Mutagenesis	0.352	5.97687	-1.359	Neutral	0.743505	23	deleterious	-0.935	-3.469	105.072	0	0	0	0	0	DNA-PKCS_A2015V
DNA-PKCS	3	missense	A2015W	DNA-PKCS	2015	2015	A	W	Saturation-Mutagenesis	0.239	5.97687	-2.469	Neutral	0.75	-42	deleterious	-1.208	-3.217	105.072	0	0	0	0	0	DNA-PKCS_A2015W
DNA-PKCS	3	missense	A2015Y	DNA-PKCS	2015	2015	A	Y	Saturation-Mutagenesis	0.425	5.97687	-2.214	Neutral	0.743505	-31	deleterious	-1.208	-4.105	105.072	0	0	0	0	0	DNA-PKCS_A2015Y
DNA-PKCS	3	missense	A2032C	DNA-PKCS	2032	2032	A	C	Saturation-Mutagenesis	-0.231	17.8431	-2.003	Neutral	0.872391	17	deleterious	-1.25	-3.971	90.3262	0	0	0	0	0	DNA-PKCS_A2032C
DNA-PKCS	3	missense	A2032D	DNA-PKCS	2032	2032	A	D	Saturation-Mutagenesis	0.006	17.8431	-2.952	Deleterious	0.872391	-68	deleterious	-1.25	-3.693	90.3262	0	0	0	0	0	DNA-PKCS_A2032D
DNA-PKCS	3	missense	A2032E	DNA-PKCS	2032	2032	A	E	Saturation-Mutagenesis	0.146	17.8431	-2.244	Neutral	0.872391	-81	deleterious	-1.25	-3.857	90.3262	0	0	0	0	0	DNA-PKCS_A2032E
DNA-PKCS	3	missense	A2032F	DNA-PKCS	2032	2032	A	F	Saturation-Mutagenesis	0.999	17.8431	-2.44	Neutral	0.872391	4	deleterious	-1.25	-2.988	90.3262	0	0	0	0	0	DNA-PKCS_A2032F
DNA-PKCS	3	missense	A2032G	DNA-PKCS	2032	2032	A	G	Saturation-Mutagenesis	-0.231	17.8431	-2.216	Neutral	0.872391	-12	deleterious	-1.25	-4.801	90.3262	0	0	0	0	0	DNA-PKCS_A2032G
DNA-PKCS	3	missense	A2032H	DNA-PKCS	2032	2032	A	H	Saturation-Mutagenesis	0.099	17.8431	-2.63	Deleterious	0.872391	15	deleterious	-1.25	-3.944	90.3262	0	0	0	0	0	DNA-PKCS_A2032H
DNA-PKCS	3	missense	A2032I	DNA-PKCS	2032	2032	A	I	Saturation-Mutagenesis	0.693	17.8431	-1.897	Neutral	0.872391	-10	deleterious	-1.25	-3.241	90.3262	0	0	0	0	0	DNA-PKCS_A2032I
DNA-PKCS	3	missense	A2032K	DNA-PKCS	2032	2032	A	K	Saturation-Mutagenesis	0.095	17.8431	-2.344	Neutral	0.872391	-6	deleterious	-1.25	-3.904	90.3262	0	0	0	0	0	DNA-PKCS_A2032K
DNA-PKCS	3	missense	A2032L	DNA-PKCS	2032	2032	A	L	Saturation-Mutagenesis	0.805	17.8431	-2.03	Neutral	0.872391	-3	deleterious	-1.25	-3.242	90.3262	0	0	0	0	0	DNA-PKCS_A2032L
DNA-PKCS	3	missense	A2032M	DNA-PKCS	2032	2032	A	M	Saturation-Mutagenesis	0.684	17.8431	-1.821	Neutral	0.872391	-33	deleterious	-1.25	-3.416	90.3262	0	0	0	0	0	DNA-PKCS_A2032M
DNA-PKCS	3	missense	A2032N	DNA-PKCS	2032	2032	A	N	Saturation-Mutagenesis	-0.276	17.8431	-2.706	Deleterious	0.872391	-24	deleterious	-1.25	-3.585	90.3262	0	0	0	0	0	DNA-PKCS_A2032N
DNA-PKCS	3	missense	A2032P	DNA-PKCS	2032	2032	A	P	Saturation-Mutagenesis	0.155	17.8431	-2.344	Neutral	0.872391	13	deleterious	-1.25	-3.522	90.3262	0	0	0	0	0	DNA-PKCS_A2032P
DNA-PKCS	3	missense	A2032Q	DNA-PKCS	2032	2032	A	Q	Saturation-Mutagenesis	-0.276	17.8431	-2.144	Neutral	0.872391	27	deleterious	-1.25	-3.909	90.3262	0	0	0	0	0	DNA-PKCS_A2032Q
DNA-PKCS	3	missense	A2032R	DNA-PKCS	2032	2032	A	R	Saturation-Mutagenesis	0.295	17.8431	-2.477	Neutral	0.872391	37	deleterious	-1.154	-2.994	90.3262	0	0	0	0	0	DNA-PKCS_A2032R
DNA-PKCS	3	missense	A2032S	DNA-PKCS	2032	2032	A	S	Saturation-Mutagenesis	0.412	17.8431	-1.251	Neutral	0.872391	-83	deleterious	-1.25	-3.676	90.3262	0	0	0	0	0	DNA-PKCS_A2032S
DNA-PKCS	3	missense	A2032T	DNA-PKCS	2032	2032	A	T	Saturation-Mutagenesis	-0.43	17.8431	-1.346	Neutral	0.872391	-36	deleterious	-1.25	-3.549	90.3262	0	0	0	0	0	DNA-PKCS_A2032T
DNA-PKCS	1	missense	A2032V	DNA-PKCS	2032	2032	A	V	Pathogenic	0.648	17.8431	-1.301	Neutral	0.872391	37	deleterious	-1.25	-4.115	90.3262	0	0	0	0	0	DNA-PKCS_A2032V
DNA-PKCS	3	missense	A2032W	DNA-PKCS	2032	2032	A	W	Saturation-Mutagenesis	-0.148	17.8431	-3.248	Deleterious	0.892785	-33	deleterious	-1.25	-1.754	90.3262	0	0	0	0	0	DNA-PKCS_A2032W
DNA-PKCS	3	missense	A2032Y	DNA-PKCS	2032	2032	A	Y	Saturation-Mutagenesis	0.836	17.8431	-2.374	Neutral	0.872391	-27	deleterious	-1.25	-4.335	90.3262	0	0	0	0	0	DNA-PKCS_A2032Y
DNA-PKCS	3	missense	A2062C	DNA-PKCS	2062	2062	A	C	Saturation-Mutagenesis	-0.389	9.12412	-1.432	Neutral	0.880667	-33	deleterious	-1.656	-4.009	104.755	0	0	0	0	0	DNA-PKCS_A2062C
DNA-PKCS	3	missense	A2062D	DNA-PKCS	2062	2062	A	D	Saturation-Mutagenesis	-1.522	9.12412	-0.863	Neutral	0.880667	30	neutral	-1.656	-2.522	104.755	0	0	0	0	0	DNA-PKCS_A2062D
DNA-PKCS	3	missense	A2062E	DNA-PKCS	2062	2062	A	E	Saturation-Mutagenesis	-1.39	9.12412	-0.589	Neutral	0.880667	-22	neutral	-1.656	-2.962	104.755	0	0	0	0	0	DNA-PKCS_A2062E
DNA-PKCS	3	missense	A2062F	DNA-PKCS	2062	2062	A	F	Saturation-Mutagenesis	-0.845	9.12412	-1.757	Neutral	0.880667	17	deleterious	-0.919	-3.357	104.755	0	0	0	0	0	DNA-PKCS_A2062F
DNA-PKCS	3	missense	A2062G	DNA-PKCS	2062	2062	A	G	Saturation-Mutagenesis	-0.674	9.12412	-1.148	Neutral	0.880667	-37	deleterious	-0.919	-3.392	104.755	0	0	0	0	0	DNA-PKCS_A2062G
DNA-PKCS	3	missense	A2062H	DNA-PKCS	2062	2062	A	H	Saturation-Mutagenesis	-1.232	9.12412	-1.13	Neutral	0.880667	-40	deleterious	-1.656	-4.68	104.755	0	0	0	0	0	DNA-PKCS_A2062H
DNA-PKCS	3	missense	A2062I	DNA-PKCS	2062	2062	A	I	Saturation-Mutagenesis	-0.611	9.12412	-1.329	Neutral	0.880667	11	deleterious	-0.919	-2.703	104.755	0	0	0	0	0	DNA-PKCS_A2062I
DNA-PKCS	3	missense	A2062K	DNA-PKCS	2062	2062	A	K	Saturation-Mutagenesis	-1.246	9.12412	-0.745	Neutral	0.880667	-35	deleterious	-1.656	-3.594	104.755	0	0	0	0	0	DNA-PKCS_A2062K
DNA-PKCS	3	missense	A2062L	DNA-PKCS	2062	2062	A	L	Saturation-Mutagenesis	-0.845	9.12412	-1.229	Neutral	0.880667	15	deleterious	-0.919	-3.07	104.755	0	0	0	0	0	DNA-PKCS_A2062L
DNA-PKCS	3	missense	A2062M	DNA-PKCS	2062	2062	A	M	Saturation-Mutagenesis	-0.691	9.12412	-0.97	Neutral	0.880667	24	deleterious	-0.919	-3.33	104.755	0	0	0	0	0	DNA-PKCS_A2062M
DNA-PKCS	3	missense	A2062N	DNA-PKCS	2062	2062	A	N	Saturation-Mutagenesis	-0.695	9.12412	-0.633	Neutral	0.880667	18	deleterious	-1.656	-4.143	104.755	0	0	0	0	0	DNA-PKCS_A2062N
DNA-PKCS	3	missense	A2062P	DNA-PKCS	2062	2062	A	P	Saturation-Mutagenesis	-0.61	9.12412	-0.81	Neutral	0.880667	-15	deleterious	-0.919	-4.139	104.755	0	0	0	0	0	DNA-PKCS_A2062P
DNA-PKCS	3	missense	A2062Q	DNA-PKCS	2062	2062	A	Q	Saturation-Mutagenesis	-0.344	9.12412	-0.723	Neutral	0.880667	-30	deleterious	-1.656	-3.825	104.755	0	0	0	0	0	DNA-PKCS_A2062Q
DNA-PKCS	3	missense	A2062R	DNA-PKCS	2062	2062	A	R	Saturation-Mutagenesis	-0.713	9.12412	-0.748	Neutral	0.880667	-84	deleterious	-1.656	-4.135	104.755	0	0	0	0	0	DNA-PKCS_A2062R
DNA-PKCS	3	missense	A2062S	DNA-PKCS	2062	2062	A	S	Saturation-Mutagenesis	-0.596	9.12412	0.003	Neutral	0.880667	-45	neutral	-1.656	-1.623	104.755	0	0	0	0	0	DNA-PKCS_A2062S
DNA-PKCS	3	missense	A2062T	DNA-PKCS	2062	2062	A	T	Saturation-Mutagenesis	-0.658	9.12412	0.682	Neutral	0.880667	17	neutral	-1.656	-2.701	104.755	0	0	0	0	0	DNA-PKCS_A2062T
DNA-PKCS	3	missense	A2062V	DNA-PKCS	2062	2062	A	V	Saturation-Mutagenesis	-0.487	9.12412	-0.878	Neutral	0.880667	22	deleterious	-0.919	-2.916	104.755	0	0	0	0	0	DNA-PKCS_A2062V
DNA-PKCS	3	missense	A2062W	DNA-PKCS	2062	2062	A	W	Saturation-Mutagenesis	-0.917	9.12412	-2.021	Neutral	0.885048	15	deleterious	-0.919	-5.221	104.755	0	0	0	0	0	DNA-PKCS_A2062W
DNA-PKCS	3	missense	A2062Y	DNA-PKCS	2062	2062	A	Y	Saturation-Mutagenesis	-0.917	9.12412	-1.545	Neutral	0.880667	14	deleterious	-0.919	-3.133	104.755	0	0	0	0	0	DNA-PKCS_A2062Y
DNA-PKCS	3	missense	A2095C	DNA-PKCS	2095	2095	A	C	Saturation-Mutagenesis	-1.02	17.2846	-2.174	Neutral	1.02959	-50	deleterious	-2.551	-4.797	108.23	0	0	0	0	0	DNA-PKCS_A2095C
DNA-PKCS	3	missense	A2095D	DNA-PKCS	2095	2095	A	D	Saturation-Mutagenesis	-0.946	17.2846	-2.849	Deleterious	1.02959	48	deleterious	-2.551	-3.801	108.23	0	0	0	0	0	DNA-PKCS_A2095D
DNA-PKCS	3	missense	A2095E	DNA-PKCS	2095	2095	A	E	Saturation-Mutagenesis	-1.975	17.2846	-2.145	Neutral	1.02959	-9	neutral	-2.551	-3.584	108.23	0	0	0	0	0	DNA-PKCS_A2095E
DNA-PKCS	3	missense	A2095F	DNA-PKCS	2095	2095	A	F	Saturation-Mutagenesis	-0.957	17.2846	-2.973	Deleterious	1.02959	22	neutral	-2.551	-3.789	108.23	0	0	0	0	0	DNA-PKCS_A2095F
DNA-PKCS	3	missense	A2095G	DNA-PKCS	2095	2095	A	G	Saturation-Mutagenesis	-1.251	17.2846	-2.465	Neutral	1.02959	-43	neutral	-2.551	-2.483	108.23	0	0	0	0	0	DNA-PKCS_A2095G
DNA-PKCS	3	missense	A2095H	DNA-PKCS	2095	2095	A	H	Saturation-Mutagenesis	-1.049	17.2846	-3.073	Deleterious	1.02959	-17	neutral	-2.551	-2.893	108.23	0	0	0	0	0	DNA-PKCS_A2095H
DNA-PKCS	3	missense	A2095I	DNA-PKCS	2095	2095	A	I	Saturation-Mutagenesis	-1.764	17.2846	-1.912	Neutral	1.02959	-19	neutral	-2.551	-2.982	108.23	0	0	0	0	0	DNA-PKCS_A2095I
DNA-PKCS	3	missense	A2095K	DNA-PKCS	2095	2095	A	K	Saturation-Mutagenesis	-0.57	17.2846	-2.345	Neutral	1.02959	-5	neutral	-2.551	-3.582	108.23	0	0	0	0	0	DNA-PKCS_A2095K
DNA-PKCS	3	missense	A2095L	DNA-PKCS	2095	2095	A	L	Saturation-Mutagenesis	-0.463	17.2846	-2.012	Neutral	1.02959	7	neutral	-2.551	-2.278	108.23	0	0	0	0	0	DNA-PKCS_A2095L
DNA-PKCS	3	missense	A2095M	DNA-PKCS	2095	2095	A	M	Saturation-Mutagenesis	-0.957	17.2846	-1.912	Neutral	1.02959	-14	neutral	-2.551	-1.612	108.23	0	0	0	0	0	DNA-PKCS_A2095M
DNA-PKCS	3	missense	A2095N	DNA-PKCS	2095	2095	A	N	Saturation-Mutagenesis	-1.631	17.2846	-2.959	Deleterious	1.02959	-1	neutral	-2.551	-3.81	108.23	0	0	0	0	0	DNA-PKCS_A2095N
DNA-PKCS	3	missense	A2095P	DNA-PKCS	2095	2095	A	P	Saturation-Mutagenesis	-1.421	17.2846	-1.978	Neutral	1.02959	-7	deleterious	-2.551	-3.99	108.23	0	0	0	0	0	DNA-PKCS_A2095P
DNA-PKCS	3	missense	A2095Q	DNA-PKCS	2095	2095	A	Q	Saturation-Mutagenesis	-1.83	17.2846	-2.245	Neutral	1.02959	-7	neutral	-2.551	-2.772	108.23	0	0	0	0	0	DNA-PKCS_A2095Q
DNA-PKCS	3	missense	A2095R	DNA-PKCS	2095	2095	A	R	Saturation-Mutagenesis	-0.894	17.2846	-2.412	Neutral	1.02959	-72	neutral	-2.551	-3.803	108.23	0	0	0	0	0	DNA-PKCS_A2095R
DNA-PKCS	3	missense	A2095S	DNA-PKCS	2095	2095	A	S	Saturation-Mutagenesis	-0.631	17.2846	-1.356	Neutral	1.02959	-14	neutral	-2.551	-3.466	108.23	0	0	0	0	0	DNA-PKCS_A2095S
DNA-PKCS	2	missense	A2095T	DNA-PKCS	2095	2095	A	T	Non-Pathogenic	-1.954	17.2846	-1.465	Neutral	1.02959	-18	neutral	-2.551	-3.5	108.23	0	0	0	0	0	DNA-PKCS_A2095T
DNA-PKCS	2	missense	A2095V	DNA-PKCS	2095	2095	A	V	Non-Pathogenic	-1.589	17.2846	-1.35	Neutral	1.02959	15	neutral	-2.551	-3.105	108.23	0	0	0	0	0	DNA-PKCS_A2095V
DNA-PKCS	3	missense	A2095W	DNA-PKCS	2095	2095	A	W	Saturation-Mutagenesis	-1.138	17.2846	-3.777	Deleterious	1.06939	41	neutral	-1.538	-2.641	108.23	0	0	0	0	0	DNA-PKCS_A2095W
DNA-PKCS	3	missense	A2095Y	DNA-PKCS	2095	2095	A	Y	Saturation-Mutagenesis	-1.138	17.2846	-2.973	Deleterious	1.02959	15	neutral	-2.551	-3.906	108.23	0	0	0	0	0	DNA-PKCS_A2095Y
DNA-PKCS	3	missense	A2099C	DNA-PKCS	2099	2099	A	C	Saturation-Mutagenesis	-0.279	18.0218	-2.211	Neutral	1.0861	-82	deleterious	-1.384	-3.171	108.775	0	0	0	0	0	DNA-PKCS_A2099C
DNA-PKCS	3	missense	A2099D	DNA-PKCS	2099	2099	A	D	Saturation-Mutagenesis	-0.604	18.0218	-2.248	Neutral	1.0861	60	deleterious	-1.384	-3.404	108.775	0	0	0	0	0	DNA-PKCS_A2099D
DNA-PKCS	3	missense	A2099E	DNA-PKCS	2099	2099	A	E	Saturation-Mutagenesis	-0.843	18.0218	-1.693	Neutral	1.0861	-48	deleterious	-1.384	-2.568	108.775	0	0	0	0	0	DNA-PKCS_A2099E
DNA-PKCS	3	missense	A2099F	DNA-PKCS	2099	2099	A	F	Saturation-Mutagenesis	-0.568	18.0218	-2.861	Deleterious	1.0861	-50	deleterious	-1.596	-4.15	108.775	0	0	0	0	0	DNA-PKCS_A2099F
DNA-PKCS	3	missense	A2099G	DNA-PKCS	2099	2099	A	G	Saturation-Mutagenesis	-0.369	18.0218	-0.527	Neutral	1.0861	-79	deleterious	-1.384	-2.543	108.775	0	0	0	0	0	DNA-PKCS_A2099G
DNA-PKCS	3	missense	A2099H	DNA-PKCS	2099	2099	A	H	Saturation-Mutagenesis	-0.893	18.0218	-2.132	Neutral	1.0861	39	deleterious	-1.384	-3.204	108.775	0	0	0	0	0	DNA-PKCS_A2099H
DNA-PKCS	3	missense	A2099I	DNA-PKCS	2099	2099	A	I	Saturation-Mutagenesis	-0.266	18.0218	-2.55	Deleterious	1.0861	-55	deleterious	-1.384	-3.986	108.775	0	0	0	0	0	DNA-PKCS_A2099I
DNA-PKCS	3	missense	A2099K	DNA-PKCS	2099	2099	A	K	Saturation-Mutagenesis	-0.549	18.0218	-1.293	Neutral	1.0861	25	deleterious	-1.384	-3.089	108.775	0	0	0	0	0	DNA-PKCS_A2099K
DNA-PKCS	3	missense	A2099L	DNA-PKCS	2099	2099	A	L	Saturation-Mutagenesis	-0.53	18.0218	-2.45	Neutral	1.0861	-72	deleterious	-1.384	-4.062	108.775	0	0	0	0	0	DNA-PKCS_A2099L
DNA-PKCS	3	missense	A2099M	DNA-PKCS	2099	2099	A	M	Saturation-Mutagenesis	-0.655	18.0218	-2.121	Neutral	1.0861	-47	neutral	-1.596	-2.724	108.775	0	0	0	0	0	DNA-PKCS_A2099M
DNA-PKCS	3	missense	A2099N	DNA-PKCS	2099	2099	A	N	Saturation-Mutagenesis	-0.232	18.0218	-1.697	Neutral	1.0861	-30	deleterious	-1.384	-3.681	108.775	0	0	0	0	0	DNA-PKCS_A2099N
DNA-PKCS	3	missense	A2099P	DNA-PKCS	2099	2099	A	P	Saturation-Mutagenesis	-0.579	18.0218	-2.166	Neutral	1.0861	-63	deleterious	-1.384	-3.105	108.775	0	0	0	0	0	DNA-PKCS_A2099P
DNA-PKCS	3	missense	A2099Q	DNA-PKCS	2099	2099	A	Q	Saturation-Mutagenesis	-0.338	18.0218	-1.693	Neutral	1.0861	-48	neutral	-1.384	-2.102	108.775	0	0	0	0	0	DNA-PKCS_A2099Q
DNA-PKCS	3	missense	A2099R	DNA-PKCS	2099	2099	A	R	Saturation-Mutagenesis	-0.878	18.0218	-1.533	Neutral	1.0861	13	deleterious	-1.384	-3.349	108.775	0	0	0	0	0	DNA-PKCS_A2099R
DNA-PKCS	2	missense	A2099S	DNA-PKCS	2099	2099	A	S	Non-Pathogenic	0.186	18.0218	-0.524	Neutral	1.0861	-58	deleterious	-1.384	-4.625	108.775	0	0	0	0	0	DNA-PKCS_A2099S
DNA-PKCS	3	missense	A2099T	DNA-PKCS	2099	2099	A	T	Saturation-Mutagenesis	-0.682	18.0218	-1.276	Neutral	1.0861	-50	deleterious	-1.384	-3.031	108.775	0	0	0	0	0	DNA-PKCS_A2099T
DNA-PKCS	3	missense	A2099V	DNA-PKCS	2099	2099	A	V	Saturation-Mutagenesis	-0.499	18.0218	-2.028	Neutral	1.0861	-60	deleterious	-1.384	-4.337	108.775	0	0	0	0	0	DNA-PKCS_A2099V
DNA-PKCS	3	missense	A2099W	DNA-PKCS	2099	2099	A	W	Saturation-Mutagenesis	-0.703	18.0218	-3.189	Deleterious	1.11966	-33	deleterious	-1.596	-3.616	108.775	0	0	0	0	0	DNA-PKCS_A2099W
DNA-PKCS	3	missense	A2099Y	DNA-PKCS	2099	2099	A	Y	Saturation-Mutagenesis	-0.655	18.0218	-2.661	Deleterious	1.0861	-47	deleterious	-1.596	-3.45	108.775	0	0	0	0	0	DNA-PKCS_A2099Y
DNA-PKCS	3	missense	A211C	DNA-PKCS	211	211	A	C	Saturation-Mutagenesis	0.19	4.84059	-1.357	Neutral	0.676435	-27	neutral	-1.865	-4.073	106.927	0.241107	0.554458	10.2435	0.0383727	0.634988	DNA-PKCS_A211C
DNA-PKCS	3	missense	A211D	DNA-PKCS	211	211	A	D	Saturation-Mutagenesis	1.006	4.84059	-0.939	Neutral	0.676435	15	deleterious	-1.865	-4.855	106.927	0.241107	0.554458	10.2435	0.0383727	0.634988	DNA-PKCS_A211D
DNA-PKCS	3	missense	A211E	DNA-PKCS	211	211	A	E	Saturation-Mutagenesis	0.503	4.84059	-0.48	Neutral	0.676435	41	neutral	-1.865	-3.685	106.927	0.241107	0.554458	10.2435	0.0383727	0.634988	DNA-PKCS_A211E
DNA-PKCS	3	missense	A211F	DNA-PKCS	211	211	A	F	Saturation-Mutagenesis	1.181	4.84059	-1.897	Neutral	0.676435	-27	neutral	-1.865	-2.194	106.927	0.241107	0.554458	10.2435	0.0383727	0.634988	DNA-PKCS_A211F
DNA-PKCS	3	missense	A211G	DNA-PKCS	211	211	A	G	Saturation-Mutagenesis	0.414	4.84059	-0.711	Neutral	0.676435	-27	neutral	-1.865	-4.094	106.927	0.241107	0.554458	10.2435	0.0383727	0.634988	DNA-PKCS_A211G
DNA-PKCS	3	missense	A211H	DNA-PKCS	211	211	A	H	Saturation-Mutagenesis	0.671	4.84059	-1.362	Neutral	0.676435	-14	deleterious	-1.612	-4.14	106.927	0.241107	0.554458	10.2435	0.0383727	0.634988	DNA-PKCS_A211H
DNA-PKCS	3	missense	A211I	DNA-PKCS	211	211	A	I	Saturation-Mutagenesis	0.48	4.84059	-1.617	Neutral	0.676435	-22	neutral	-1.865	-2.627	106.927	0.241107	0.554458	10.2435	0.0383727	0.634988	DNA-PKCS_A211I
DNA-PKCS	3	missense	A211K	DNA-PKCS	211	211	A	K	Saturation-Mutagenesis	1.024	4.84059	0.453	Neutral	0.676435	22	neutral	-1.865	-4.021	106.927	0.241107	0.554458	10.2435	0.0383727	0.634988	DNA-PKCS_A211K
DNA-PKCS	3	missense	A211L	DNA-PKCS	211	211	A	L	Saturation-Mutagenesis	0.935	4.84059	-1.417	Neutral	0.676435	-66	neutral	-1.865	-2.335	106.927	0.241107	0.554458	10.2435	0.0383727	0.634988	DNA-PKCS_A211L
DNA-PKCS	3	missense	A211M	DNA-PKCS	211	211	A	M	Saturation-Mutagenesis	1.167	4.84059	-1.082	Neutral	0.676435	-55	neutral	-1.865	-1.76	106.927	0.241107	0.554458	10.2435	0.0383727	0.634988	DNA-PKCS_A211M
DNA-PKCS	3	missense	A211N	DNA-PKCS	211	211	A	N	Saturation-Mutagenesis	0.737	4.84059	-0.581	Neutral	0.676435	30	neutral	-1.865	-3.49	106.927	0.241107	0.554458	10.2435	0.0383727	0.634988	DNA-PKCS_A211N
DNA-PKCS	3	missense	A211P	DNA-PKCS	211	211	A	P	Saturation-Mutagenesis	0.414	4.84059	-1.082	Neutral	0.676435	-36	deleterious	-1.865	-4.68	106.927	0.241107	0.554458	10.2435	0.0383727	0.634988	DNA-PKCS_A211P
DNA-PKCS	3	missense	A211Q	DNA-PKCS	211	211	A	Q	Saturation-Mutagenesis	1.034	4.84059	-0.547	Neutral	0.676435	78	neutral	-1.865	-3.358	106.927	0.241107	0.554458	10.2435	0.0383727	0.634988	DNA-PKCS_A211Q
DNA-PKCS	3	missense	A211R	DNA-PKCS	211	211	A	R	Saturation-Mutagenesis	1.136	4.84059	-0.482	Neutral	0.676435	7	deleterious	-1.612	-4.147	106.927	0.241107	0.554458	10.2435	0.0383727	0.634988	DNA-PKCS_A211R
DNA-PKCS	3	missense	A211S	DNA-PKCS	211	211	A	S	Saturation-Mutagenesis	0.54	4.84059	0.386	Neutral	0.676435	37	neutral	-1.865	-3.883	106.927	0.241107	0.554458	10.2435	0.0383727	0.634988	DNA-PKCS_A211S
DNA-PKCS	2	missense	A211T	DNA-PKCS	211	211	A	T	Non-Pathogenic	0.509	4.84059	0.412	Neutral	0.676435	47	neutral	-1.865	-3.718	106.927	0.241107	0.554458	10.2435	0.0383727	0.634988	DNA-PKCS_A211T
DNA-PKCS	3	missense	A211V	DNA-PKCS	211	211	A	V	Saturation-Mutagenesis	0.48	4.84059	-1.137	Neutral	0.676435	-20	neutral	-1.865	-3.559	106.927	0.241107	0.554458	10.2435	0.0383727	0.634988	DNA-PKCS_A211V
DNA-PKCS	3	missense	A211W	DNA-PKCS	211	211	A	W	Saturation-Mutagenesis	-0.787	4.84059	-2.09	Neutral	0.677083	-34	neutral	-1.865	-3.825	106.927	0.241107	0.554458	10.2435	0.0383727	0.634988	DNA-PKCS_A211W
DNA-PKCS	3	missense	A211Y	DNA-PKCS	211	211	A	Y	Saturation-Mutagenesis	1.226	4.84059	-1.664	Neutral	0.676435	-11	neutral	-1.865	-2.855	106.927	0.241107	0.554458	10.2435	0.0383727	0.634988	DNA-PKCS_A211Y
DNA-PKCS	3	missense	A2147C	DNA-PKCS	2147	2147	A	C	Saturation-Mutagenesis	-0.807	9.83857	-2.312	Neutral	0.947763	15	neutral	-1.956	-3.84	103.394	1.02502	2.00556	15.4539	0.0621346	3.77496	DNA-PKCS_A2147C
DNA-PKCS	3	missense	A2147D	DNA-PKCS	2147	2147	A	D	Saturation-Mutagenesis	-0.443	9.83857	-3.402	Deleterious	0.947763	-30	neutral	-2.842	-3.405	103.394	1.02502	2.00556	15.4539	0.0621346	3.77496	DNA-PKCS_A2147D
DNA-PKCS	3	missense	A2147E	DNA-PKCS	2147	2147	A	E	Saturation-Mutagenesis	-1.975	9.83857	-2.974	Deleterious	0.947763	-33	neutral	-2.842	-3.667	103.394	1.02502	2.00556	15.4539	0.0621346	3.77496	DNA-PKCS_A2147E
DNA-PKCS	3	missense	A2147F	DNA-PKCS	2147	2147	A	F	Saturation-Mutagenesis	-0.869	9.83857	-3.368	Deleterious	0.947763	4	neutral	-1.956	-3.848	103.394	1.02502	2.00556	15.4539	0.0621346	3.77496	DNA-PKCS_A2147F
DNA-PKCS	3	missense	A2147G	DNA-PKCS	2147	2147	A	G	Saturation-Mutagenesis	-1.007	9.83857	-2.646	Deleterious	0.947763	24	neutral	-1.956	-2.969	103.394	1.02502	2.00556	15.4539	0.0621346	3.77496	DNA-PKCS_A2147G
DNA-PKCS	3	missense	A2147H	DNA-PKCS	2147	2147	A	H	Saturation-Mutagenesis	-0.388	9.83857	-3.668	Deleterious	0.947763	17	neutral	-2.842	-2.599	103.394	1.02502	2.00556	15.4539	0.0621346	3.77496	DNA-PKCS_A2147H
DNA-PKCS	3	missense	A2147I	DNA-PKCS	2147	2147	A	I	Saturation-Mutagenesis	-1.492	9.83857	-2.274	Neutral	0.947763	15	neutral	-1.956	-2.561	103.394	1.02502	2.00556	15.4539	0.0621346	3.77496	DNA-PKCS_A2147I
DNA-PKCS	3	missense	A2147K	DNA-PKCS	2147	2147	A	K	Saturation-Mutagenesis	-0.457	9.83857	-3.007	Deleterious	0.947763	18	neutral	-2.842	-3.154	103.394	1.02502	2.00556	15.4539	0.0621346	3.77496	DNA-PKCS_A2147K
DNA-PKCS	3	missense	A2147L	DNA-PKCS	2147	2147	A	L	Saturation-Mutagenesis	-0.458	9.83857	-2.54	Deleterious	0.947763	17	neutral	-1.956	-3.464	103.394	1.02502	2.00556	15.4539	0.0621346	3.77496	DNA-PKCS_A2147L
DNA-PKCS	3	missense	A2147M	DNA-PKCS	2147	2147	A	M	Saturation-Mutagenesis	-0.869	9.83857	-2.574	Deleterious	0.947763	21	neutral	-1.956	-2.648	103.394	1.02502	2.00556	15.4539	0.0621346	3.77496	DNA-PKCS_A2147M
DNA-PKCS	3	missense	A2147N	DNA-PKCS	2147	2147	A	N	Saturation-Mutagenesis	-1.976	9.83857	-3.468	Deleterious	0.947763	22	neutral	-2.842	-2.745	103.394	1.02502	2.00556	15.4539	0.0621346	3.77496	DNA-PKCS_A2147N
DNA-PKCS	3	missense	A2147P	DNA-PKCS	2147	2147	A	P	Saturation-Mutagenesis	-1.285	9.83857	-3.074	Deleterious	0.947763	17	neutral	-1.956	-3.513	103.394	1.02502	2.00556	15.4539	0.0621346	3.77496	DNA-PKCS_A2147P
DNA-PKCS	3	missense	A2147Q	DNA-PKCS	2147	2147	A	Q	Saturation-Mutagenesis	-2.162	9.83857	-3.007	Deleterious	0.947763	11	neutral	-2.842	-3.799	103.394	1.02502	2.00556	15.4539	0.0621346	3.77496	DNA-PKCS_A2147Q
DNA-PKCS	3	missense	A2147R	DNA-PKCS	2147	2147	A	R	Saturation-Mutagenesis	-0.618	9.83857	-3.107	Deleterious	0.947763	-45	neutral	-2.842	-3.475	103.394	1.02502	2.00556	15.4539	0.0621346	3.77496	DNA-PKCS_A2147R
DNA-PKCS	3	missense	A2147S	DNA-PKCS	2147	2147	A	S	Saturation-Mutagenesis	-0.568	9.83857	-1.518	Neutral	0.947763	-37	neutral	-2.842	-2.229	103.394	1.02502	2.00556	15.4539	0.0621346	3.77496	DNA-PKCS_A2147S
DNA-PKCS	3	missense	A2147T	DNA-PKCS	2147	2147	A	T	Saturation-Mutagenesis	-1.819	9.83857	-1.946	Neutral	0.947763	-15	neutral	-2.842	-4.335	103.394	1.02502	2.00556	15.4539	0.0621346	3.77496	DNA-PKCS_A2147T
DNA-PKCS	3	missense	A2147V	DNA-PKCS	2147	2147	A	V	Saturation-Mutagenesis	-1.437	9.83857	-1.779	Neutral	0.947763	14	neutral	-1.956	-2.558	103.394	1.02502	2.00556	15.4539	0.0621346	3.77496	DNA-PKCS_A2147V
DNA-PKCS	3	missense	A2147W	DNA-PKCS	2147	2147	A	W	Saturation-Mutagenesis	-1.027	9.83857	-4.33	Deleterious	0.932178	7	neutral	-1.956	-2.198	103.394	1.02502	2.00556	15.4539	0.0621346	3.77496	DNA-PKCS_A2147W
DNA-PKCS	3	missense	A2147Y	DNA-PKCS	2147	2147	A	Y	Saturation-Mutagenesis	-1.027	9.83857	-3.468	Deleterious	0.947763	45	deleterious	-1.956	-4.984	103.394	1.02502	2.00556	15.4539	0.0621346	3.77496	DNA-PKCS_A2147Y
DNA-PKCS	3	missense	A2161C	DNA-PKCS	2161	2161	A	C	Saturation-Mutagenesis	-0.39	14.3357	-2.346	Neutral	0.75	-60	deleterious	-1.268	-3.333	95.3669	0.732088	1.39281	16.6575	0.0665096	2.91769	DNA-PKCS_A2161C
DNA-PKCS	3	missense	A2161D	DNA-PKCS	2161	2161	A	D	Saturation-Mutagenesis	-0.817	14.3357	-3.635	Deleterious	0.75	-28	deleterious	-1.268	-3.392	95.3669	0.732088	1.39281	16.6575	0.0665096	2.91769	DNA-PKCS_A2161D
DNA-PKCS	3	missense	A2161E	DNA-PKCS	2161	2161	A	E	Saturation-Mutagenesis	-1	14.3357	-3.007	Deleterious	0.75	-74	deleterious	-1.268	-4.964	95.3669	0.732088	1.39281	16.6575	0.0665096	2.91769	DNA-PKCS_A2161E
DNA-PKCS	3	missense	A2161F	DNA-PKCS	2161	2161	A	F	Saturation-Mutagenesis	-0.531	14.3357	-3.735	Deleterious	0.75	4	deleterious	-1.25	-3.757	95.3669	0.732088	1.39281	16.6575	0.0665096	2.91769	DNA-PKCS_A2161F
DNA-PKCS	1	missense	A2161G	DNA-PKCS	2161	2161	A	G	Pathogenic	-0.418	14.3357	-2.312	Neutral	0.75	-24	deleterious	-1.268	-2.248	95.3669	0.732088	1.39281	16.6575	0.0665096	2.91769	DNA-PKCS_A2161G
DNA-PKCS	3	missense	A2161H	DNA-PKCS	2161	2161	A	H	Saturation-Mutagenesis	-0.614	14.3357	-2.802	Deleterious	0.75	-27	deleterious	-1.268	-3.317	95.3669	0.732088	1.39281	16.6575	0.0665096	2.91769	DNA-PKCS_A2161H
DNA-PKCS	3	missense	A2161I	DNA-PKCS	2161	2161	A	I	Saturation-Mutagenesis	-0.405	14.3357	-3.34	Deleterious	0.75	-2	deleterious	-1.268	-4.018	95.3669	0.732088	1.39281	16.6575	0.0665096	2.91769	DNA-PKCS_A2161I
DNA-PKCS	3	missense	A2161K	DNA-PKCS	2161	2161	A	K	Saturation-Mutagenesis	-0.684	14.3357	-3.074	Deleterious	0.75	-13	deleterious	-1.268	-3.572	95.3669	0.732088	1.39281	16.6575	0.0665096	2.91769	DNA-PKCS_A2161K
DNA-PKCS	3	missense	A2161L	DNA-PKCS	2161	2161	A	L	Saturation-Mutagenesis	-0.531	14.3357	-3.34	Deleterious	0.75	-24	deleterious	-1.25	-4.059	95.3669	0.732088	1.39281	16.6575	0.0665096	2.91769	DNA-PKCS_A2161L
DNA-PKCS	3	missense	A2161M	DNA-PKCS	2161	2161	A	M	Saturation-Mutagenesis	-0.436	14.3357	-3.174	Deleterious	0.75	21	deleterious	-1.25	-4.806	95.3669	0.732088	1.39281	16.6575	0.0665096	2.91769	DNA-PKCS_A2161M
DNA-PKCS	3	missense	A2161N	DNA-PKCS	2161	2161	A	N	Saturation-Mutagenesis	-0.056	14.3357	-3.368	Deleterious	0.75	-42	deleterious	-1.268	-2.974	95.3669	0.732088	1.39281	16.6575	0.0665096	2.91769	DNA-PKCS_A2161N
DNA-PKCS	3	missense	A2161P	DNA-PKCS	2161	2161	A	P	Saturation-Mutagenesis	-0.371	14.3357	-3.207	Deleterious	0.75	-28	deleterious	-1.268	-4.294	95.3669	0.732088	1.39281	16.6575	0.0665096	2.91769	DNA-PKCS_A2161P
DNA-PKCS	3	missense	A2161Q	DNA-PKCS	2161	2161	A	Q	Saturation-Mutagenesis	-0.284	14.3357	-2.974	Deleterious	0.75	-30	deleterious	-1.268	-2.294	95.3669	0.732088	1.39281	16.6575	0.0665096	2.91769	DNA-PKCS_A2161Q
DNA-PKCS	3	missense	A2161R	DNA-PKCS	2161	2161	A	R	Saturation-Mutagenesis	-0.977	14.3357	-3.007	Deleterious	0.75	-36	deleterious	-1.268	-3.233	95.3669	0.785637	1.56652	17.4302	0.067171	3.26382	DNA-PKCS_A2161R
DNA-PKCS	3	missense	A2161S	DNA-PKCS	2161	2161	A	S	Saturation-Mutagenesis	0.553	14.3357	-1.618	Neutral	0.75	-71	deleterious	-1.268	-3.399	95.3669	0.732088	1.39281	16.6575	0.0665096	2.91769	DNA-PKCS_A2161S
DNA-PKCS	2	missense	A2161T	DNA-PKCS	2161	2161	A	T	Non-Pathogenic	0.064	14.3357	-2.479	Neutral	0.75	-47	deleterious	-1.268	-3.696	95.3669	0.732088	1.39281	16.6575	0.0665096	2.91769	DNA-PKCS_A2161T
DNA-PKCS	3	missense	A2161V	DNA-PKCS	2161	2161	A	V	Saturation-Mutagenesis	-0.453	14.3357	-2.712	Deleterious	0.75	-26	deleterious	-1.268	-3.996	95.3669	0.732088	1.39281	16.6575	0.0665096	2.91769	DNA-PKCS_A2161V
DNA-PKCS	3	missense	A2161W	DNA-PKCS	2161	2161	A	W	Saturation-Mutagenesis	-0.595	14.3357	-4.43	Deleterious	0.726923	35	deleterious	-1.25	-3.904	95.3669	0.732088	1.39281	16.6575	0.0665096	2.91769	DNA-PKCS_A2161W
DNA-PKCS	3	missense	A2161Y	DNA-PKCS	2161	2161	A	Y	Saturation-Mutagenesis	-0.595	14.3357	-3.435	Deleterious	0.75	65	deleterious	-1.25	-3.82	95.3669	0.732088	1.39281	16.6575	0.0665096	2.91769	DNA-PKCS_A2161Y
DNA-PKCS	3	missense	A2172C	DNA-PKCS	2172	2172	A	C	Saturation-Mutagenesis	-0.419	18.1607	-1.027	Neutral	0.933798	44	deleterious	-1.494	-3.36	105.53	0.456484	0.995231	12.8562	0.0462133	1.94884	DNA-PKCS_A2172C
DNA-PKCS	3	missense	A2172D	DNA-PKCS	2172	2172	A	D	Saturation-Mutagenesis	-0.073	18.1607	-2.5	Deleterious	0.933798	31	deleterious	-1.494	-3.749	105.53	0.456484	0.995231	12.8562	0.0462133	1.94884	DNA-PKCS_A2172D
DNA-PKCS	3	missense	A2172E	DNA-PKCS	2172	2172	A	E	Saturation-Mutagenesis	-1.019	18.1607	-2.021	Neutral	0.933798	-10	deleterious	-1.494	-4.691	105.53	0.456484	0.995231	12.8562	0.0462133	1.94884	DNA-PKCS_A2172E
DNA-PKCS	3	missense	A2172F	DNA-PKCS	2172	2172	A	F	Saturation-Mutagenesis	-0.456	18.1607	-1.054	Neutral	0.933798	57	deleterious	-1.494	-2.699	105.53	0.456484	0.995231	12.8562	0.0462133	1.94884	DNA-PKCS_A2172F
DNA-PKCS	3	missense	A2172G	DNA-PKCS	2172	2172	A	G	Saturation-Mutagenesis	-0.604	18.1607	-2.289	Neutral	0.933798	15	deleterious	-1.494	-3.909	105.53	0.456484	0.995231	12.8562	0.0462133	1.94884	DNA-PKCS_A2172G
DNA-PKCS	3	missense	A2172H	DNA-PKCS	2172	2172	A	H	Saturation-Mutagenesis	-0.028	18.1607	-2.516	Deleterious	0.933798	41	deleterious	-1.372	-3.883	105.53	0.456484	0.995231	12.8562	0.0462133	1.94884	DNA-PKCS_A2172H
DNA-PKCS	3	missense	A2172I	DNA-PKCS	2172	2172	A	I	Saturation-Mutagenesis	-1.043	18.1607	1.527	Neutral	0.933798	58	deleterious	-1.494	-3.594	105.53	0.456484	0.995231	12.8562	0.0462133	1.94884	DNA-PKCS_A2172I
DNA-PKCS	3	missense	A2172K	DNA-PKCS	2172	2172	A	K	Saturation-Mutagenesis	-0.067	18.1607	-1.871	Neutral	0.933798	38	deleterious	-1.372	-3.43	105.53	0.456484	0.995231	12.8562	0.0462133	1.94884	DNA-PKCS_A2172K
DNA-PKCS	3	missense	A2172L	DNA-PKCS	2172	2172	A	L	Saturation-Mutagenesis	-0.333	18.1607	0.481	Neutral	0.933798	55	deleterious	-1.494	-3.89	105.53	0.456484	0.995231	12.8562	0.0462133	1.94884	DNA-PKCS_A2172L
DNA-PKCS	3	missense	A2172M	DNA-PKCS	2172	2172	A	M	Saturation-Mutagenesis	-0.732	18.1607	0.081	Neutral	0.933798	64	deleterious	-1.494	-3.016	105.53	0.456484	0.995231	12.8562	0.0462133	1.94884	DNA-PKCS_A2172M
DNA-PKCS	3	missense	A2172N	DNA-PKCS	2172	2172	A	N	Saturation-Mutagenesis	-0.733	18.1607	-2.316	Neutral	0.933798	18	deleterious	-1.494	-3.676	105.53	0.456484	0.995231	12.8562	0.0462133	1.94884	DNA-PKCS_A2172N
DNA-PKCS	3	missense	A2172P	DNA-PKCS	2172	2172	A	P	Saturation-Mutagenesis	-0.772	18.1607	-2.121	Neutral	0.933798	45	deleterious	-1.494	-3.772	105.53	0.456484	0.995231	12.8562	0.0462133	1.94884	DNA-PKCS_A2172P
DNA-PKCS	3	missense	A2172Q	DNA-PKCS	2172	2172	A	Q	Saturation-Mutagenesis	-0.896	18.1607	-2.005	Neutral	0.933798	36	deleterious	-1.494	-3.396	105.53	0.456484	0.995231	12.8562	0.0462133	1.94884	DNA-PKCS_A2172Q
DNA-PKCS	3	missense	A2172R	DNA-PKCS	2172	2172	A	R	Saturation-Mutagenesis	-0.521	18.1607	-2.244	Neutral	0.933798	28	deleterious	-1.372	-4.601	105.53	0.415262	1.00385	12.0665	0.0374319	1.8657	DNA-PKCS_A2172R
DNA-PKCS	3	missense	A2172S	DNA-PKCS	2172	2172	A	S	Saturation-Mutagenesis	-0.32	18.1607	-1.428	Neutral	0.933798	6	deleterious	-1.494	-3.498	105.53	0.456484	0.995231	12.8562	0.0462133	1.94884	DNA-PKCS_A2172S
DNA-PKCS	3	missense	A2172T	DNA-PKCS	2172	2172	A	T	Saturation-Mutagenesis	-1.093	18.1607	-0.754	Neutral	0.933798	10	deleterious	-1.494	-3.893	105.53	0.456484	0.995231	12.8562	0.0462133	1.94884	DNA-PKCS_A2172T
DNA-PKCS	2	missense	A2172V	DNA-PKCS	2172	2172	A	V	Non-Pathogenic	-0.879	18.1607	1.638	Neutral	0.933798	54	deleterious	-1.494	-4.576	105.53	0.456484	0.995231	12.8562	0.0462133	1.94884	DNA-PKCS_A2172V
DNA-PKCS	3	missense	A2172W	DNA-PKCS	2172	2172	A	W	Saturation-Mutagenesis	-0.882	18.1607	-2.721	Deleterious	0.950485	-59	neutral	-1.494	-1.903	105.53	0.456484	0.995231	12.8562	0.0462133	1.94884	DNA-PKCS_A2172W
DNA-PKCS	3	missense	A2172Y	DNA-PKCS	2172	2172	A	Y	Saturation-Mutagenesis	-0.732	18.1607	-1.404	Neutral	0.933798	82	deleterious	-1.494	-2.24	105.53	0.456484	0.995231	12.8562	0.0462133	1.94884	DNA-PKCS_A2172Y
DNA-PKCS	3	missense	A2173C	DNA-PKCS	2173	2173	A	C	Saturation-Mutagenesis	-0.199	19.7955	-0.885	Neutral	0.950485	-29	neutral	-2.599	-2.109	108.203	0.414483	0.950842	12.6237	0.0446443	1.74535	DNA-PKCS_A2173C
DNA-PKCS	3	missense	A2173D	DNA-PKCS	2173	2173	A	D	Saturation-Mutagenesis	-1.513	19.7955	-2.475	Neutral	0.950485	-61	neutral	-2.599	-3.329	108.203	0.414483	0.950842	12.6237	0.0446443	1.74535	DNA-PKCS_A2173D
DNA-PKCS	3	missense	A2173E	DNA-PKCS	2173	2173	A	E	Saturation-Mutagenesis	-1.237	19.7955	-1.83	Neutral	0.950485	-56	neutral	-2.599	-3.514	108.203	0.414483	0.950842	12.6237	0.0446443	1.74535	DNA-PKCS_A2173E
DNA-PKCS	3	missense	A2173F	DNA-PKCS	2173	2173	A	F	Saturation-Mutagenesis	-0.704	19.7955	-0.651	Neutral	0.950485	-29	neutral	-2.599	-2.596	108.203	0.414483	0.950842	12.6237	0.0446443	1.74535	DNA-PKCS_A2173F
DNA-PKCS	3	missense	A2173G	DNA-PKCS	2173	2173	A	G	Saturation-Mutagenesis	-0.162	19.7955	-2.226	Neutral	0.950485	-19	deleterious	-2.599	-4.976	108.203	0.414483	0.950842	12.6237	0.0446443	1.74535	DNA-PKCS_A2173G
DNA-PKCS	3	missense	A2173H	DNA-PKCS	2173	2173	A	H	Saturation-Mutagenesis	-1.063	19.7955	-2.375	Neutral	0.950485	-62	deleterious	-1.494	-3.876	108.203	0.414483	0.950842	12.6237	0.0446443	1.74535	DNA-PKCS_A2173H
DNA-PKCS	3	missense	A2173I	DNA-PKCS	2173	2173	A	I	Saturation-Mutagenesis	-0.605	19.7955	1.937	Neutral	0.950485	-32	neutral	-2.599	-2.228	108.203	0.414483	0.950842	12.6237	0.0446443	1.74535	DNA-PKCS_A2173I
DNA-PKCS	3	missense	A2173K	DNA-PKCS	2173	2173	A	K	Saturation-Mutagenesis	-1.153	19.7955	-1.73	Neutral	0.950485	-39	neutral	-2.599	-2.694	108.203	0.414483	0.950842	12.6237	0.0446443	1.74535	DNA-PKCS_A2173K
DNA-PKCS	3	missense	A2173L	DNA-PKCS	2173	2173	A	L	Saturation-Mutagenesis	-0.704	19.7955	0.897	Neutral	0.950485	-35	neutral	-2.599	-3.51	108.203	0.414483	0.950842	12.6237	0.0446443	1.74535	DNA-PKCS_A2173L
DNA-PKCS	3	missense	A2173M	DNA-PKCS	2173	2173	A	M	Saturation-Mutagenesis	-0.626	19.7955	0.597	Neutral	0.950485	-16	neutral	-2.599	-3.844	108.203	0.414483	0.950842	12.6237	0.0446443	1.74535	DNA-PKCS_A2173M
DNA-PKCS	3	missense	A2173N	DNA-PKCS	2173	2173	A	N	Saturation-Mutagenesis	-0.169	19.7955	-2.241	Neutral	0.950485	-12	neutral	-2.599	-3.474	108.203	0.414483	0.950842	12.6237	0.0446443	1.74535	DNA-PKCS_A2173N
DNA-PKCS	3	missense	A2173P	DNA-PKCS	2173	2173	A	P	Saturation-Mutagenesis	-0.138	19.7955	-1.83	Neutral	0.950485	-40	neutral	-2.599	-2.444	108.203	0.414483	0.950842	12.6237	0.0446443	1.74535	DNA-PKCS_A2173P
DNA-PKCS	3	missense	A2173Q	DNA-PKCS	2173	2173	A	Q	Saturation-Mutagenesis	-0.091	19.7955	-1.73	Neutral	0.950485	-23	neutral	-2.599	-2.656	108.203	0.414483	0.950842	12.6237	0.0446443	1.74535	DNA-PKCS_A2173Q
DNA-PKCS	3	missense	A2173R	DNA-PKCS	2173	2173	A	R	Saturation-Mutagenesis	-1.048	19.7955	-2.217	Neutral	0.950485	-62	deleterious	-1.494	-3.556	108.203	0.456484	0.995231	12.8562	0.0462133	1.94884	DNA-PKCS_A2173R
DNA-PKCS	3	missense	A2173S	DNA-PKCS	2173	2173	A	S	Saturation-Mutagenesis	-0.151	19.7955	-1.347	Neutral	0.950485	-61	neutral	-2.599	-3.273	108.203	0.414483	0.950842	12.6237	0.0446443	1.74535	DNA-PKCS_A2173S
DNA-PKCS	2	missense	A2173T	DNA-PKCS	2173	2173	A	T	Non-Pathogenic	-0.065	19.7955	-0.199	Neutral	0.950485	-56	neutral	-2.599	-3.268	108.203	0.414483	0.950842	12.6237	0.0446443	1.74535	DNA-PKCS_A2173T
DNA-PKCS	3	missense	A2173V	DNA-PKCS	2173	2173	A	V	Saturation-Mutagenesis	-0.311	19.7955	2.282	Neutral	0.950485	-40	neutral	-2.599	-2.686	108.203	0.414483	0.950842	12.6237	0.0446443	1.74535	DNA-PKCS_A2173V
DNA-PKCS	3	missense	A2173W	DNA-PKCS	2173	2173	A	W	Saturation-Mutagenesis	-0.761	19.7955	-2.333	Neutral	0.950485	33	neutral	-2.599	-4.183	108.203	0.414483	0.950842	12.6237	0.0446443	1.74535	DNA-PKCS_A2173W
DNA-PKCS	3	missense	A2173Y	DNA-PKCS	2173	2173	A	Y	Saturation-Mutagenesis	-0.761	19.7955	-0.968	Neutral	0.950485	29	deleterious	-2.599	-4.495	108.203	0.414483	0.950842	12.6237	0.0446443	1.74535	DNA-PKCS_A2173Y
DNA-PKCS	3	missense	A2191C	DNA-PKCS	2191	2191	A	C	Saturation-Mutagenesis	-0.255	3.17903	-1.553	Neutral	1.06667	49	deleterious	-0.957	-3.236	110.946	0.545968	1.17329	14.0267	0.049872	1.94007	DNA-PKCS_A2191C
DNA-PKCS	3	missense	A2191D	DNA-PKCS	2191	2191	A	D	Saturation-Mutagenesis	-0.282	3.17903	-3.193	Deleterious	1.06667	14	deleterious	-1.192	-3.661	110.946	0.545968	1.17329	14.0267	0.049872	1.94007	DNA-PKCS_A2191D
DNA-PKCS	3	missense	A2191E	DNA-PKCS	2191	2191	A	E	Saturation-Mutagenesis	-0.953	3.17903	-2.482	Neutral	1.06667	16	deleterious	-1.192	-3.906	110.946	0.545968	1.17329	14.0267	0.049872	1.94007	DNA-PKCS_A2191E
DNA-PKCS	3	missense	A2191F	DNA-PKCS	2191	2191	A	F	Saturation-Mutagenesis	0.7	3.17903	-1.52	Neutral	1.06667	-18	deleterious	-0.957	-3.057	110.946	0.545968	1.17329	14.0267	0.049872	1.94007	DNA-PKCS_A2191F
DNA-PKCS	3	missense	A2191G	DNA-PKCS	2191	2191	A	G	Saturation-Mutagenesis	0.009	3.17903	-2.609	Deleterious	1.06667	34	deleterious	-0.957	-3.29	110.946	0.545968	1.17329	14.0267	0.049872	1.94007	DNA-PKCS_A2191G
DNA-PKCS	3	missense	A2191H	DNA-PKCS	2191	2191	A	H	Saturation-Mutagenesis	0.118	3.17903	-2.976	Deleterious	1.06667	20	deleterious	-1.192	-3.011	110.946	0.545968	1.17329	14.0267	0.049872	1.94007	DNA-PKCS_A2191H
DNA-PKCS	3	missense	A2191I	DNA-PKCS	2191	2191	A	I	Saturation-Mutagenesis	-0.383	3.17903	-0.033	Neutral	1.06667	-73	deleterious	-0.957	-3.804	110.946	0.545968	1.17329	14.0267	0.049872	1.94007	DNA-PKCS_A2191I
DNA-PKCS	3	missense	A2191K	DNA-PKCS	2191	2191	A	K	Saturation-Mutagenesis	0.081	3.17903	-2.398	Neutral	1.06667	53	deleterious	-1.192	-2.352	110.946	0.545968	1.17329	14.0267	0.049872	1.94007	DNA-PKCS_A2191K
DNA-PKCS	3	missense	A2191L	DNA-PKCS	2191	2191	A	L	Saturation-Mutagenesis	0.277	3.17903	-0.573	Neutral	1.06667	-77	deleterious	-0.957	-5.033	110.946	0.545968	1.17329	14.0267	0.049872	1.94007	DNA-PKCS_A2191L
DNA-PKCS	3	missense	A2191M	DNA-PKCS	2191	2191	A	M	Saturation-Mutagenesis	1.209	3.17903	-0.773	Neutral	1.06667	-25	deleterious	-0.957	-3.263	110.946	0.545968	1.17329	14.0267	0.049872	1.94007	DNA-PKCS_A2191M
DNA-PKCS	3	missense	A2191N	DNA-PKCS	2191	2191	A	N	Saturation-Mutagenesis	-0.706	3.17903	-3.11	Deleterious	1.06667	-6	deleterious	-0.957	-3.402	110.946	0.545968	1.17329	14.0267	0.049872	1.94007	DNA-PKCS_A2191N
DNA-PKCS	3	missense	A2191P	DNA-PKCS	2191	2191	A	P	Saturation-Mutagenesis	-0.366	3.17903	-2.548	Deleterious	1.06667	12	deleterious	-0.957	-3.367	110.946	0.545968	1.17329	14.0267	0.049872	1.94007	DNA-PKCS_A2191P
DNA-PKCS	3	missense	A2191Q	DNA-PKCS	2191	2191	A	Q	Saturation-Mutagenesis	-0.255	3.17903	-2.398	Neutral	1.06667	-14	deleterious	-0.957	-2.281	110.946	0.545968	1.17329	14.0267	0.049872	1.94007	DNA-PKCS_A2191Q
DNA-PKCS	3	missense	A2191R	DNA-PKCS	2191	2191	A	R	Saturation-Mutagenesis	-0.419	3.17903	-2.718	Deleterious	1.06667	4	deleterious	-1.192	-2.898	110.946	1.11709	2.24914	18.5167	0.0773905	3.21614	DNA-PKCS_A2191R
DNA-PKCS	3	missense	A2191S	DNA-PKCS	2191	2191	A	S	Saturation-Mutagenesis	-0.648	3.17903	-1.681	Neutral	1.06667	-14	deleterious	-0.957	-3.879	110.946	0.545968	1.17329	14.0267	0.049872	1.94007	DNA-PKCS_A2191S
DNA-PKCS	3	missense	A2191T	DNA-PKCS	2191	2191	A	T	Saturation-Mutagenesis	-0.91	3.17903	-1.234	Neutral	1.06667	23	deleterious	-0.957	-4.584	110.946	0.545968	1.17329	14.0267	0.049872	1.94007	DNA-PKCS_A2191T
DNA-PKCS	3	missense	A2191V	DNA-PKCS	2191	2191	A	V	Saturation-Mutagenesis	-0.208	3.17903	0.411	Neutral	1.06667	-57	deleterious	-0.957	-3.694	110.946	0.545968	1.17329	14.0267	0.049872	1.94007	DNA-PKCS_A2191V
DNA-PKCS	3	missense	A2191W	DNA-PKCS	2191	2191	A	W	Saturation-Mutagenesis	0.847	3.17903	-3.068	Deleterious	1.06271	21	deleterious	-0.957	-3.956	110.946	0.545968	1.17329	14.0267	0.049872	1.94007	DNA-PKCS_A2191W
DNA-PKCS	3	missense	A2191Y	DNA-PKCS	2191	2191	A	Y	Saturation-Mutagenesis	0.88	3.17903	-1.837	Neutral	1.06667	34	deleterious	-0.957	-3.508	110.946	0.545968	1.17329	14.0267	0.049872	1.94007	DNA-PKCS_A2191Y
DNA-PKCS	3	missense	A21C	DNA-PKCS	21	21	A	C	Saturation-Mutagenesis	-0.273	28.8995	-0.788	Neutral	0.83268	-45	neutral	-1.886	-2.198	99.456	0.647072	1.31958	14.4164	0.0545419	2.71597	DNA-PKCS_A21C
DNA-PKCS	3	missense	A21D	DNA-PKCS	21	21	A	D	Saturation-Mutagenesis	-0.813	28.8995	-0.698	Neutral	0.83268	-22	deleterious	-1.886	-4.033	99.456	0.647072	1.31958	14.4164	0.0545419	2.71597	DNA-PKCS_A21D
DNA-PKCS	3	missense	A21E	DNA-PKCS	21	21	A	E	Saturation-Mutagenesis	-0.957	28.8995	-0.53	Neutral	0.83268	-42	deleterious	-1.886	-4.703	99.456	0.647072	1.31958	14.4164	0.0545419	2.71597	DNA-PKCS_A21E
DNA-PKCS	3	missense	A21F	DNA-PKCS	21	21	A	F	Saturation-Mutagenesis	0.06	28.8995	-1.495	Neutral	0.83268	-3	deleterious	-1.377	-3.319	99.456	0.647072	1.31958	14.4164	0.0545419	2.71597	DNA-PKCS_A21F
DNA-PKCS	3	missense	A21G	DNA-PKCS	21	21	A	G	Saturation-Mutagenesis	-0.263	28.8995	-0.82	Neutral	0.83268	-67	deleterious	-1.886	-4.127	99.456	0.647072	1.31958	14.4164	0.0545419	2.71597	DNA-PKCS_A21G
DNA-PKCS	3	missense	A21H	DNA-PKCS	21	21	A	H	Saturation-Mutagenesis	-0.142	28.8995	-1.382	Neutral	0.83268	-55	neutral	-1.886	-3.379	99.456	0.647072	1.31958	14.4164	0.0545419	2.71597	DNA-PKCS_A21H
DNA-PKCS	3	missense	A21I	DNA-PKCS	21	21	A	I	Saturation-Mutagenesis	-0.564	28.8995	-1.156	Neutral	0.83268	-46	neutral	-2.124	-3.35	99.456	0.647072	1.31958	14.4164	0.0545419	2.71597	DNA-PKCS_A21I
DNA-PKCS	3	missense	A21K	DNA-PKCS	21	21	A	K	Saturation-Mutagenesis	-1.014	28.8995	-1.053	Neutral	0.83268	-48	deleterious	-1.886	-4.002	99.456	0.647072	1.31958	14.4164	0.0545419	2.71597	DNA-PKCS_A21K
DNA-PKCS	3	missense	A21L	DNA-PKCS	21	21	A	L	Saturation-Mutagenesis	-0.564	28.8995	-1.122	Neutral	0.83268	-32	neutral	-1.834	-1.687	99.456	0.647072	1.31958	14.4164	0.0545419	2.71597	DNA-PKCS_A21L
DNA-PKCS	3	missense	A21M	DNA-PKCS	21	21	A	M	Saturation-Mutagenesis	-0.303	28.8995	-1.087	Neutral	0.83268	-42	deleterious	-1.377	-5.38	99.456	0.647072	1.31958	14.4164	0.0545419	2.71597	DNA-PKCS_A21M
DNA-PKCS	3	missense	A21N	DNA-PKCS	21	21	A	N	Saturation-Mutagenesis	-0.679	28.8995	-0.88	Neutral	0.83268	-59	neutral	-1.886	-2.346	99.456	0.647072	1.31958	14.4164	0.0545419	2.71597	DNA-PKCS_A21N
DNA-PKCS	3	missense	A21P	DNA-PKCS	21	21	A	P	Saturation-Mutagenesis	-0.476	28.8995	-1.086	Neutral	0.83268	-41	neutral	-1.886	-3.692	99.456	0.647072	1.31958	14.4164	0.0545419	2.71597	DNA-PKCS_A21P
DNA-PKCS	3	missense	A21Q	DNA-PKCS	21	21	A	Q	Saturation-Mutagenesis	-0.657	28.8995	-0.764	Neutral	0.83268	-56	neutral	-1.886	-1.794	99.456	0.647072	1.31958	14.4164	0.0545419	2.71597	DNA-PKCS_A21Q
DNA-PKCS	3	missense	A21R	DNA-PKCS	21	21	A	R	Saturation-Mutagenesis	-1.428	28.8995	-1.319	Neutral	0.83268	-47	neutral	-1.886	-3.484	99.456	0.647072	1.31958	14.4164	0.0545419	2.71597	DNA-PKCS_A21R
DNA-PKCS	3	missense	A21S	DNA-PKCS	21	21	A	S	Saturation-Mutagenesis	-0.265	28.8995	-0.068	Neutral	0.83268	-79	neutral	-1.886	-3.559	99.456	0.647072	1.31958	14.4164	0.0545419	2.71597	DNA-PKCS_A21S
DNA-PKCS	3	missense	A21T	DNA-PKCS	21	21	A	T	Saturation-Mutagenesis	-0.386	28.8995	-0.387	Neutral	0.83268	-75	deleterious	-1.886	-3.956	99.456	0.647072	1.31958	14.4164	0.0545419	2.71597	DNA-PKCS_A21T
DNA-PKCS	2	missense	A21V	DNA-PKCS	21	21	A	V	Non-Pathogenic	-0.476	28.8995	-0.914	Neutral	0.83268	-48	neutral	-1.886	-2.698	99.456	0.647072	1.31958	14.4164	0.0545419	2.71597	DNA-PKCS_A21V
DNA-PKCS	3	missense	A21W	DNA-PKCS	21	21	A	W	Saturation-Mutagenesis	-0.012	28.8995	-2.095	Neutral	0.83268	45	deleterious	-1.812	-5.347	99.456	0.647072	1.31958	14.4164	0.0545419	2.71597	DNA-PKCS_A21W
DNA-PKCS	3	missense	A21Y	DNA-PKCS	21	21	A	Y	Saturation-Mutagenesis	0.058	28.8995	-1.595	Neutral	0.83268	-21	neutral	-1.571	-1.572	99.456	0.647072	1.31958	14.4164	0.0545419	2.71597	DNA-PKCS_A21Y
DNA-PKCS	3	missense	A2200C	DNA-PKCS	2200	2200	A	C	Saturation-Mutagenesis	-0.08	9.82415	-2.312	Neutral	1.0719	36	deleterious	-1.193	-3.548	96.1509	0.476504	1.08917	14.1457	0.056069	1.67177	DNA-PKCS_A2200C
DNA-PKCS	3	missense	A2200D	DNA-PKCS	2200	2200	A	D	Saturation-Mutagenesis	-0.124	9.82415	-3.157	Deleterious	1.0719	-10	deleterious	-1.193	-2.341	96.1509	0.476504	1.08917	14.1457	0.056069	1.67177	DNA-PKCS_A2200D
DNA-PKCS	3	missense	A2200E	DNA-PKCS	2200	2200	A	E	Saturation-Mutagenesis	0.166	9.82415	-2.451	Neutral	1.0719	-3	deleterious	-1.193	-3.435	96.1509	0.476504	1.08917	14.1457	0.056069	1.67177	DNA-PKCS_A2200E
DNA-PKCS	3	missense	A2200F	DNA-PKCS	2200	2200	A	F	Saturation-Mutagenesis	-1.163	9.82415	-2.68	Deleterious	1.0719	-23	deleterious	-1.251	-4.703	96.1509	0.476504	1.08917	14.1457	0.056069	1.67177	DNA-PKCS_A2200F
DNA-PKCS	3	missense	A2200G	DNA-PKCS	2200	2200	A	G	Saturation-Mutagenesis	0.151	9.82415	-2.401	Neutral	1.0719	15	deleterious	-1.193	-3.963	96.1509	0.476504	1.08917	14.1457	0.056069	1.67177	DNA-PKCS_A2200G
DNA-PKCS	3	missense	A2200H	DNA-PKCS	2200	2200	A	H	Saturation-Mutagenesis	-0.078	9.82415	-2.88	Deleterious	1.0719	13	deleterious	-1.193	-3.105	96.1509	0.476504	1.08917	14.1457	0.056069	1.67177	DNA-PKCS_A2200H
DNA-PKCS	3	missense	A2200I	DNA-PKCS	2200	2200	A	I	Saturation-Mutagenesis	-0.636	9.82415	-2.485	Neutral	1.0719	-76	deleterious	-1.193	-4.244	96.1509	0.476504	1.08917	14.1457	0.056069	1.67177	DNA-PKCS_A2200I
DNA-PKCS	3	missense	A2200K	DNA-PKCS	2200	2200	A	K	Saturation-Mutagenesis	-0.193	9.82415	-2.318	Neutral	1.0719	37	deleterious	-1.193	-3.334	96.1509	0.476504	1.08917	14.1457	0.056069	1.67177	DNA-PKCS_A2200K
DNA-PKCS	3	missense	A2200L	DNA-PKCS	2200	2200	A	L	Saturation-Mutagenesis	-1.182	9.82415	-2.418	Neutral	1.0719	-80	deleterious	-1.193	-4.115	96.1509	0.476504	1.08917	14.1457	0.056069	1.67177	DNA-PKCS_A2200L
DNA-PKCS	3	missense	A2200M	DNA-PKCS	2200	2200	A	M	Saturation-Mutagenesis	0.466	9.82415	-2.418	Neutral	1.0719	-35	deleterious	-1.251	-3.777	96.1509	0.476504	1.08917	14.1457	0.056069	1.67177	DNA-PKCS_A2200M
DNA-PKCS	3	missense	A2200N	DNA-PKCS	2200	2200	A	N	Saturation-Mutagenesis	-0.004	9.82415	-3.168	Deleterious	1.0719	-27	deleterious	-1.193	-3.674	96.1509	0.476504	1.08917	14.1457	0.056069	1.67177	DNA-PKCS_A2200N
DNA-PKCS	3	missense	A2200P	DNA-PKCS	2200	2200	A	P	Saturation-Mutagenesis	-0.481	9.82415	-2.885	Deleterious	1.0719	3	deleterious	-1.193	-3.343	96.1509	0.476504	1.08917	14.1457	0.056069	1.67177	DNA-PKCS_A2200P
DNA-PKCS	3	missense	A2200Q	DNA-PKCS	2200	2200	A	Q	Saturation-Mutagenesis	-0.08	9.82415	-2.085	Neutral	1.0719	-33	deleterious	-1.193	-3.063	96.1509	0.476504	1.08917	14.1457	0.056069	1.67177	DNA-PKCS_A2200Q
DNA-PKCS	3	missense	A2200R	DNA-PKCS	2200	2200	A	R	Saturation-Mutagenesis	-0.023	9.82415	-2.351	Neutral	1.0719	-12	deleterious	-1.193	-3.009	96.1509	0.476504	1.08917	14.1457	0.056069	1.67177	DNA-PKCS_A2200R
DNA-PKCS	3	missense	A2200S	DNA-PKCS	2200	2200	A	S	Saturation-Mutagenesis	-0.004	9.82415	-1.412	Neutral	1.0719	-33	deleterious	-1.193	-5.039	96.1509	0.476504	1.08917	14.1457	0.056069	1.67177	DNA-PKCS_A2200S
DNA-PKCS	3	missense	A2200T	DNA-PKCS	2200	2200	A	T	Saturation-Mutagenesis	0.119	9.82415	-1.979	Neutral	1.0719	4	deleterious	-1.193	-3.223	96.1509	0.476504	1.08917	14.1457	0.056069	1.67177	DNA-PKCS_A2200T
DNA-PKCS	3	missense	A2200V	DNA-PKCS	2200	2200	A	V	Saturation-Mutagenesis	-0.273	9.82415	-1.923	Neutral	1.0719	-64	deleterious	-1.193	-4.465	96.1509	0.476504	1.08917	14.1457	0.056069	1.67177	DNA-PKCS_A2200V
DNA-PKCS	3	missense	A2200W	DNA-PKCS	2200	2200	A	W	Saturation-Mutagenesis	-0.67	9.82415	-3.419	Deleterious	1.05423	-1	deleterious	-1.251	-3.714	96.1509	0.476504	1.08917	14.1457	0.056069	1.67177	DNA-PKCS_A2200W
DNA-PKCS	3	missense	A2200Y	DNA-PKCS	2200	2200	A	Y	Saturation-Mutagenesis	-0.513	9.82415	-2.113	Neutral	1.0719	20	deleterious	-1.251	-3.479	96.1509	0.476504	1.08917	14.1457	0.056069	1.67177	DNA-PKCS_A2200Y
DNA-PKCS	3	missense	A2212C	DNA-PKCS	2212	2212	A	C	Saturation-Mutagenesis	-0.424	16.4091	-2.446	Neutral	0.998124	68	deleterious	-1.175	-3.546	103.689	0.436304	1.06961	12.9019	0.052829	1.38271	DNA-PKCS_A2212C
DNA-PKCS	3	missense	A2212D	DNA-PKCS	2212	2212	A	D	Saturation-Mutagenesis	-0.119	16.4091	-3.502	Deleterious	0.998124	34	deleterious	-1.175	-4.024	103.689	0.436304	1.06961	12.9019	0.052829	1.38271	DNA-PKCS_A2212D
DNA-PKCS	3	missense	A2212E	DNA-PKCS	2212	2212	A	E	Saturation-Mutagenesis	-0.33	16.4091	-2.624	Deleterious	0.998124	37	deleterious	-1.175	-4.329	103.689	0.436304	1.06961	12.9019	0.052829	1.38271	DNA-PKCS_A2212E
DNA-PKCS	3	missense	A2212F	DNA-PKCS	2212	2212	A	F	Saturation-Mutagenesis	0.097	16.4091	-3.468	Deleterious	0.998124	-36	deleterious	-1.175	-3.245	103.689	0.436304	1.06961	12.9019	0.052829	1.38271	DNA-PKCS_A2212F
DNA-PKCS	3	missense	A2212G	DNA-PKCS	2212	2212	A	G	Saturation-Mutagenesis	0.21	16.4091	-2.479	Neutral	0.998124	62	deleterious	-1.175	-4.031	103.689	0.436304	1.06961	12.9019	0.052829	1.38271	DNA-PKCS_A2212G
DNA-PKCS	3	missense	A2212H	DNA-PKCS	2212	2212	A	H	Saturation-Mutagenesis	-0.357	16.4091	-3.702	Deleterious	0.998124	32	deleterious	-1.006	-3.648	103.689	0.436304	1.06961	12.9019	0.052829	1.38271	DNA-PKCS_A2212H
DNA-PKCS	3	missense	A2212I	DNA-PKCS	2212	2212	A	I	Saturation-Mutagenesis	-0.993	16.4091	-2.257	Neutral	0.998124	-19	deleterious	-1.175	-3.431	103.689	0.436304	1.06961	12.9019	0.052829	1.38271	DNA-PKCS_A2212I
DNA-PKCS	3	missense	A2212K	DNA-PKCS	2212	2212	A	K	Saturation-Mutagenesis	-0.354	16.4091	-2.957	Deleterious	0.998124	62	deleterious	-1.006	-3.917	103.689	0.436304	1.06961	12.9019	0.052829	1.38271	DNA-PKCS_A2212K
DNA-PKCS	3	missense	A2212L	DNA-PKCS	2212	2212	A	L	Saturation-Mutagenesis	0.133	16.4091	-2.39	Neutral	0.998124	-12	deleterious	-1.175	-4.147	103.689	0.436304	1.06961	12.9019	0.052829	1.38271	DNA-PKCS_A2212L
DNA-PKCS	3	missense	A2212M	DNA-PKCS	2212	2212	A	M	Saturation-Mutagenesis	0.729	16.4091	-2.49	Neutral	0.998124	-31	deleterious	-1.175	-2.327	103.689	0.436304	1.06961	12.9019	0.052829	1.38271	DNA-PKCS_A2212M
DNA-PKCS	3	missense	A2212N	DNA-PKCS	2212	2212	A	N	Saturation-Mutagenesis	-0.394	16.4091	-3.502	Deleterious	0.998124	14	deleterious	-1.175	-3.756	103.689	0.436304	1.06961	12.9019	0.052829	1.38271	DNA-PKCS_A2212N
DNA-PKCS	3	missense	A2212P	DNA-PKCS	2212	2212	A	P	Saturation-Mutagenesis	-0.833	16.4091	-3.057	Deleterious	0.998124	40	deleterious	-1.175	-4.176	103.689	0.436304	1.06961	12.9019	0.052829	1.38271	DNA-PKCS_A2212P
DNA-PKCS	3	missense	A2212Q	DNA-PKCS	2212	2212	A	Q	Saturation-Mutagenesis	-0.424	16.4091	-2.624	Deleterious	0.998124	0	deleterious	-1.175	-3.459	103.689	0.436304	1.06961	12.9019	0.052829	1.38271	DNA-PKCS_A2212Q
DNA-PKCS	3	missense	A2212R	DNA-PKCS	2212	2212	A	R	Saturation-Mutagenesis	-0.348	16.4091	-3.057	Deleterious	0.998124	19	deleterious	-1.006	-3.836	103.689	0.436304	1.06961	12.9019	0.052829	1.38271	DNA-PKCS_A2212R
DNA-PKCS	3	missense	A2212S	DNA-PKCS	2212	2212	A	S	Saturation-Mutagenesis	-0.394	16.4091	-1.534	Neutral	0.998124	27	deleterious	-1.175	-3.773	103.689	0.436304	1.06961	12.9019	0.052829	1.38271	DNA-PKCS_A2212S
DNA-PKCS	3	missense	A2212T	DNA-PKCS	2212	2212	A	T	Saturation-Mutagenesis	-0.347	16.4091	-2.079	Neutral	0.998124	45	deleterious	-1.175	-3.861	103.689	0.436304	1.06961	12.9019	0.052829	1.38271	DNA-PKCS_A2212T
DNA-PKCS	3	missense	A2212V	DNA-PKCS	2212	2212	A	V	Saturation-Mutagenesis	-0.695	16.4091	-1.712	Neutral	0.998124	0	deleterious	-1.175	-4.761	103.689	0.436304	1.06961	12.9019	0.052829	1.38271	DNA-PKCS_A2212V
DNA-PKCS	3	missense	A2212W	DNA-PKCS	2212	2212	A	W	Saturation-Mutagenesis	-1.168	16.4091	-4.346	Deleterious	0.98712	-2	deleterious	-1.175	-2.945	103.689	0.436304	1.06961	12.9019	0.052829	1.38271	DNA-PKCS_A2212W
DNA-PKCS	3	missense	A2212Y	DNA-PKCS	2212	2212	A	Y	Saturation-Mutagenesis	-0.689	16.4091	-3.468	Deleterious	0.998124	7	deleterious	-1.175	-3.372	103.689	0.436304	1.06961	12.9019	0.052829	1.38271	DNA-PKCS_A2212Y
DNA-PKCS	3	missense	A221C	DNA-PKCS	221	221	A	C	Saturation-Mutagenesis	-0.777	3.4833	-2.427	Neutral	0.576371	-22	deleterious	-1.626	-4.075	102.016	0.229454	0.610648	10.2	0.0360588	0.703341	DNA-PKCS_A221C
DNA-PKCS	3	missense	A221D	DNA-PKCS	221	221	A	D	Saturation-Mutagenesis	-2.039	3.4833	-3.068	Deleterious	0.576371	-26	neutral	-1.626	-2.952	102.016	0.229454	0.610648	10.2	0.0360588	0.703341	DNA-PKCS_A221D
DNA-PKCS	3	missense	A221E	DNA-PKCS	221	221	A	E	Saturation-Mutagenesis	-1.217	3.4833	-2.264	Neutral	0.576371	-17	neutral	-1.626	-2.062	102.016	0.229454	0.610648	10.2	0.0360588	0.703341	DNA-PKCS_A221E
DNA-PKCS	3	missense	A221F	DNA-PKCS	221	221	A	F	Saturation-Mutagenesis	-0.972	3.4833	-3.313	Deleterious	0.576371	-17	deleterious	-1.253	-3.322	102.016	0.229454	0.610648	10.2	0.0360588	0.703341	DNA-PKCS_A221F
DNA-PKCS	3	missense	A221G	DNA-PKCS	221	221	A	G	Saturation-Mutagenesis	-1.2	3.4833	-2.338	Neutral	0.576371	-25	deleterious	-1.253	-2.418	102.016	0.229454	0.610648	10.2	0.0360588	0.703341	DNA-PKCS_A221G
DNA-PKCS	3	missense	A221H	DNA-PKCS	221	221	A	H	Saturation-Mutagenesis	-2.219	3.4833	-3.046	Deleterious	0.576371	-39	deleterious	-1.626	-3.528	102.016	0.229454	0.610648	10.2	0.0360588	0.703341	DNA-PKCS_A221H
DNA-PKCS	3	missense	A221I	DNA-PKCS	221	221	A	I	Saturation-Mutagenesis	-1.356	3.4833	-2.798	Deleterious	0.576371	-22	deleterious	-1.253	-3.768	102.016	0.229454	0.610648	10.2	0.0360588	0.703341	DNA-PKCS_A221I
DNA-PKCS	3	missense	A221K	DNA-PKCS	221	221	A	K	Saturation-Mutagenesis	-1.855	3.4833	-2.464	Neutral	0.576371	-38	neutral	-1.626	-2.539	102.016	0.229454	0.610648	10.2	0.0360588	0.703341	DNA-PKCS_A221K
DNA-PKCS	3	missense	A221L	DNA-PKCS	221	221	A	L	Saturation-Mutagenesis	-1.217	3.4833	-2.798	Deleterious	0.576371	-50	deleterious	-1.253	-3.75	102.016	0.229454	0.610648	10.2	0.0360588	0.703341	DNA-PKCS_A221L
DNA-PKCS	3	missense	A221M	DNA-PKCS	221	221	A	M	Saturation-Mutagenesis	-0.967	3.4833	-2.564	Deleterious	0.576371	-44	deleterious	-1.253	-3.287	102.016	0.229454	0.610648	10.2	0.0360588	0.703341	DNA-PKCS_A221M
DNA-PKCS	3	missense	A221N	DNA-PKCS	221	221	A	N	Saturation-Mutagenesis	-1.691	3.4833	-3.024	Deleterious	0.576371	-3	deleterious	-1.626	-4.222	102.016	0.229454	0.610648	10.2	0.0360588	0.703341	DNA-PKCS_A221N
DNA-PKCS	3	missense	A221P	DNA-PKCS	221	221	A	P	Saturation-Mutagenesis	-1.2	3.4833	-2.764	Deleterious	0.576371	-33	deleterious	-1.253	-4.623	102.016	0.229454	0.610648	10.2	0.0360588	0.703341	DNA-PKCS_A221P
DNA-PKCS	3	missense	A221Q	DNA-PKCS	221	221	A	Q	Saturation-Mutagenesis	-1.468	3.4833	-2.131	Neutral	0.576371	53	deleterious	-1.626	-3.912	102.016	0.229454	0.610648	10.2	0.0360588	0.703341	DNA-PKCS_A221Q
DNA-PKCS	3	missense	A221R	DNA-PKCS	221	221	A	R	Saturation-Mutagenesis	-0.977	3.4833	-2.598	Deleterious	0.576371	-31	deleterious	-1.626	-4.691	102.016	0.229454	0.610648	10.2	0.0360588	0.703341	DNA-PKCS_A221R
DNA-PKCS	3	missense	A221S	DNA-PKCS	221	221	A	S	Saturation-Mutagenesis	-1.41	3.4833	-1.267	Neutral	0.576371	-30	neutral	-1.626	-2.203	102.016	0.229454	0.610648	10.2	0.0360588	0.703341	DNA-PKCS_A221S
DNA-PKCS	3	missense	A221T	DNA-PKCS	221	221	A	T	Saturation-Mutagenesis	-1.581	3.4833	-1.96	Neutral	0.576371	9	neutral	-1.626	-2.247	102.016	0.229454	0.610648	10.2	0.0360588	0.703341	DNA-PKCS_A221T
DNA-PKCS	3	missense	A221V	DNA-PKCS	221	221	A	V	Saturation-Mutagenesis	-1.356	3.4833	-2.149	Neutral	0.576371	-15	deleterious	-1.253	-3.448	102.016	0.229454	0.610648	10.2	0.0360588	0.703341	DNA-PKCS_A221V
DNA-PKCS	3	missense	A221W	DNA-PKCS	221	221	A	W	Saturation-Mutagenesis	-2.518	3.4833	-3.917	Deleterious	0.576371	-22	deleterious	-1.253	-3.985	102.016	0.229454	0.610648	10.2	0.0360588	0.703341	DNA-PKCS_A221W
DNA-PKCS	3	missense	A221Y	DNA-PKCS	221	221	A	Y	Saturation-Mutagenesis	-1.131	3.4833	-3.013	Deleterious	0.576371	-5	deleterious	-1.253	-3.841	102.016	0.229454	0.610648	10.2	0.0360588	0.703341	DNA-PKCS_A221Y
DNA-PKCS	3	missense	A2229C	DNA-PKCS	2229	2229	A	C	Saturation-Mutagenesis	-0.466	13.758	-2.769	Deleterious	0.72651	-84	deleterious	-1.326	-3.08	108.35	0.331633	0.685407	13.0683	0.0494903	0.975569	DNA-PKCS_A2229C
DNA-PKCS	3	missense	A2229D	DNA-PKCS	2229	2229	A	D	Saturation-Mutagenesis	-0.952	13.758	-3.202	Deleterious	0.72651	-21	deleterious	-0.986	-4.46	108.35	0.331633	0.685407	13.0683	0.0494903	0.975569	DNA-PKCS_A2229D
DNA-PKCS	3	missense	A2229E	DNA-PKCS	2229	2229	A	E	Saturation-Mutagenesis	-0.646	13.758	-2.477	Neutral	0.72651	44	deleterious	-0.986	-3.971	108.35	0.331633	0.685407	13.0683	0.0494903	0.975569	DNA-PKCS_A2229E
DNA-PKCS	3	missense	A2229F	DNA-PKCS	2229	2229	A	F	Saturation-Mutagenesis	-1.538	13.758	-3.972	Deleterious	0.72651	18	deleterious	-1.326	-3.687	108.35	0.331633	0.685407	13.0683	0.0494903	0.975569	DNA-PKCS_A2229F
DNA-PKCS	3	missense	A2229G	DNA-PKCS	2229	2229	A	G	Saturation-Mutagenesis	-0.466	13.758	-2.489	Neutral	0.72651	-40	deleterious	-1.326	-3.154	108.35	0.331633	0.685407	13.0683	0.0494903	0.975569	DNA-PKCS_A2229G
DNA-PKCS	3	missense	A2229H	DNA-PKCS	2229	2229	A	H	Saturation-Mutagenesis	-0.445	13.758	-3.422	Deleterious	0.72651	16	deleterious	-0.986	-3.568	108.35	0.331633	0.685407	13.0683	0.0494903	0.975569	DNA-PKCS_A2229H
DNA-PKCS	3	missense	A2229I	DNA-PKCS	2229	2229	A	I	Saturation-Mutagenesis	-0.936	13.758	-3.377	Deleterious	0.72651	-22	deleterious	-1.326	-3.475	108.35	0.331633	0.685407	13.0683	0.0494903	0.975569	DNA-PKCS_A2229I
DNA-PKCS	3	missense	A2229K	DNA-PKCS	2229	2229	A	K	Saturation-Mutagenesis	-0.927	13.758	-2.544	Deleterious	0.72651	-16	deleterious	-0.986	-3.141	108.35	0.331633	0.685407	13.0683	0.0494903	0.975569	DNA-PKCS_A2229K
DNA-PKCS	3	missense	A2229L	DNA-PKCS	2229	2229	A	L	Saturation-Mutagenesis	-1.67	13.758	-3.277	Deleterious	0.72651	-45	deleterious	-1.326	-4.926	108.35	0.331633	0.685407	13.0683	0.0494903	0.975569	DNA-PKCS_A2229L
DNA-PKCS	3	missense	A2229M	DNA-PKCS	2229	2229	A	M	Saturation-Mutagenesis	-0.373	13.758	-2.994	Deleterious	0.72651	17	deleterious	-1.326	-3.249	108.35	0.331633	0.685407	13.0683	0.0494903	0.975569	DNA-PKCS_A2229M
DNA-PKCS	3	missense	A2229N	DNA-PKCS	2229	2229	A	N	Saturation-Mutagenesis	-0.116	13.758	-3.248	Deleterious	0.72651	-71	deleterious	-1.326	-4.383	108.35	0.331633	0.685407	13.0683	0.0494903	0.975569	DNA-PKCS_A2229N
DNA-PKCS	3	missense	A2229P	DNA-PKCS	2229	2229	A	P	Saturation-Mutagenesis	-0.557	13.758	-2.76	Deleterious	0.72651	-35	deleterious	-1.326	-3.356	108.35	0.331633	0.685407	13.0683	0.0494903	0.975569	DNA-PKCS_A2229P
DNA-PKCS	3	missense	A2229Q	DNA-PKCS	2229	2229	A	Q	Saturation-Mutagenesis	-0.344	13.758	-2.444	Neutral	0.72651	-82	deleterious	-1.326	-3.533	108.35	0.331633	0.685407	13.0683	0.0494903	0.975569	DNA-PKCS_A2229Q
DNA-PKCS	3	missense	A2229R	DNA-PKCS	2229	2229	A	R	Saturation-Mutagenesis	-0.332	13.758	-2.494	Neutral	0.72651	-26	deleterious	-0.986	-3.11	108.35	0.406154	0.903124	15.2326	0.0554482	1.18204	DNA-PKCS_A2229R
DNA-PKCS	3	missense	A2229S	DNA-PKCS	2229	2229	A	S	Saturation-Mutagenesis	-0.014	13.758	-1.354	Neutral	0.72651	29	deleterious	-0.986	-3.89	108.35	0.331633	0.685407	13.0683	0.0494903	0.975569	DNA-PKCS_A2229S
DNA-PKCS	3	missense	A2229T	DNA-PKCS	2229	2229	A	T	Saturation-Mutagenesis	-0.344	13.758	-2.216	Neutral	0.72651	-4	neutral	-1.326	-1.893	108.35	0.331633	0.685407	13.0683	0.0494903	0.975569	DNA-PKCS_A2229T
DNA-PKCS	3	missense	A2229V	DNA-PKCS	2229	2229	A	V	Saturation-Mutagenesis	-0.456	13.758	-2.716	Deleterious	0.72651	30	deleterious	-1.326	-3.474	108.35	0.331633	0.685407	13.0683	0.0494903	0.975569	DNA-PKCS_A2229V
DNA-PKCS	3	missense	A2229W	DNA-PKCS	2229	2229	A	W	Saturation-Mutagenesis	-1.427	13.758	-4.58	Deleterious	0.743505	-33	deleterious	-1.326	-3.476	108.35	0.331633	0.685407	13.0683	0.0494903	0.975569	DNA-PKCS_A2229W
DNA-PKCS	3	missense	A2229Y	DNA-PKCS	2229	2229	A	Y	Saturation-Mutagenesis	-0.336	13.758	-3.772	Deleterious	0.72651	-30	deleterious	-1.326	-2.233	108.35	0.331633	0.685407	13.0683	0.0494903	0.975569	DNA-PKCS_A2229Y
DNA-PKCS	3	missense	A2282C	DNA-PKCS	2282	2282	A	C	Saturation-Mutagenesis	-0.133	5.80949	-2.946	Deleterious	0.857605	-83	deleterious	-1.127	-4.017	97.3394	0.208007	0.506711	10.1796	0.038449	0.588158	DNA-PKCS_A2282C
DNA-PKCS	3	missense	A2282D	DNA-PKCS	2282	2282	A	D	Saturation-Mutagenesis	-0.197	5.80949	-4.135	Deleterious	0.857605	-36	deleterious	-1.127	-3.523	97.3394	0.208007	0.506711	10.1796	0.038449	0.588158	DNA-PKCS_A2282D
DNA-PKCS	3	missense	A2282E	DNA-PKCS	2282	2282	A	E	Saturation-Mutagenesis	-0.12	5.80949	-3.457	Deleterious	0.857605	37	deleterious	-1.127	-3.374	97.3394	0.208007	0.506711	10.1796	0.038449	0.588158	DNA-PKCS_A2282E
DNA-PKCS	3	missense	A2282F	DNA-PKCS	2282	2282	A	F	Saturation-Mutagenesis	0.112	5.80949	-4.402	Deleterious	0.857605	37	neutral	-2.394	-2.718	97.3394	0.208007	0.506711	10.1796	0.038449	0.588158	DNA-PKCS_A2282F
DNA-PKCS	2	missense	A2282G	DNA-PKCS	2282	2282	A	G	Non-Pathogenic	0.302	5.80949	-2.846	Deleterious	0.857605	-36	deleterious	-1.127	-3.03	97.3394	0.208007	0.506711	10.1796	0.038449	0.588158	DNA-PKCS_A2282G
DNA-PKCS	3	missense	A2282H	DNA-PKCS	2282	2282	A	H	Saturation-Mutagenesis	-0.552	5.80949	-4.302	Deleterious	0.857605	5	deleterious	-1.127	-4.018	97.3394	0.208007	0.506711	10.1796	0.038449	0.588158	DNA-PKCS_A2282H
DNA-PKCS	3	missense	A2282I	DNA-PKCS	2282	2282	A	I	Saturation-Mutagenesis	-0.358	5.80949	-3.624	Deleterious	0.857605	17	deleterious	-1.127	-2.607	97.3394	0.208007	0.506711	10.1796	0.038449	0.588158	DNA-PKCS_A2282I
DNA-PKCS	3	missense	A2282K	DNA-PKCS	2282	2282	A	K	Saturation-Mutagenesis	-0.824	5.80949	-3.457	Deleterious	0.857605	-29	deleterious	-1.127	-3.802	97.3394	0.208007	0.506711	10.1796	0.038449	0.588158	DNA-PKCS_A2282K
DNA-PKCS	3	missense	A2282L	DNA-PKCS	2282	2282	A	L	Saturation-Mutagenesis	0.011	5.80949	-3.69	Deleterious	0.857605	-12	deleterious	-1.127	-3.569	97.3394	0.208007	0.506711	10.1796	0.038449	0.588158	DNA-PKCS_A2282L
DNA-PKCS	3	missense	A2282M	DNA-PKCS	2282	2282	A	M	Saturation-Mutagenesis	0.387	5.80949	-3.524	Deleterious	0.857605	13	deleterious	-1.127	-3.89	97.3394	0.208007	0.506711	10.1796	0.038449	0.588158	DNA-PKCS_A2282M
DNA-PKCS	3	missense	A2282N	DNA-PKCS	2282	2282	A	N	Saturation-Mutagenesis	-0.117	5.80949	-3.968	Deleterious	0.857605	-68	deleterious	-1.127	-4.589	97.3394	0.208007	0.506711	10.1796	0.038449	0.588158	DNA-PKCS_A2282N
DNA-PKCS	3	missense	A2282P	DNA-PKCS	2282	2282	A	P	Saturation-Mutagenesis	-0.274	5.80949	-3.624	Deleterious	0.857605	-24	deleterious	-1.127	-2.718	97.3394	0.208007	0.506711	10.1796	0.038449	0.588158	DNA-PKCS_A2282P
DNA-PKCS	3	missense	A2282Q	DNA-PKCS	2282	2282	A	Q	Saturation-Mutagenesis	-0.133	5.80949	-3.457	Deleterious	0.857605	-81	deleterious	-1.127	-3.721	97.3394	0.208007	0.506711	10.1796	0.038449	0.588158	DNA-PKCS_A2282Q
DNA-PKCS	3	missense	A2282R	DNA-PKCS	2282	2282	A	R	Saturation-Mutagenesis	-0.551	5.80949	-3.657	Deleterious	0.857605	-36	deleterious	-1.127	-3.626	97.3394	0.399123	0.649714	11.8425	0.0543363	1.06685	DNA-PKCS_A2282R
DNA-PKCS	3	missense	A2282S	DNA-PKCS	2282	2282	A	S	Saturation-Mutagenesis	-0.117	5.80949	-1.501	Neutral	0.857605	15	deleterious	-1.127	-4.035	97.3394	0.208007	0.506711	10.1796	0.038449	0.588158	DNA-PKCS_A2282S
DNA-PKCS	3	missense	A2282T	DNA-PKCS	2282	2282	A	T	Saturation-Mutagenesis	-0.111	5.80949	-2.579	Deleterious	0.857605	-6	deleterious	-1.127	-4.019	97.3394	0.208007	0.506711	10.1796	0.038449	0.588158	DNA-PKCS_A2282T
DNA-PKCS	2	missense	A2282V	DNA-PKCS	2282	2282	A	V	Non-Pathogenic	-0.12	5.80949	-2.946	Deleterious	0.857605	27	deleterious	-1.127	-2.211	97.3394	0.208007	0.506711	10.1796	0.038449	0.588158	DNA-PKCS_A2282V
DNA-PKCS	3	missense	A2282W	DNA-PKCS	2282	2282	A	W	Saturation-Mutagenesis	-0.045	5.80949	-5.28	Deleterious	0.835582	-3	neutral	-2.394	-3.257	97.3394	0.208007	0.506711	10.1796	0.038449	0.588158	DNA-PKCS_A2282W
DNA-PKCS	3	missense	A2282Y	DNA-PKCS	2282	2282	A	Y	Saturation-Mutagenesis	0.033	5.80949	-4.402	Deleterious	0.857605	-10	neutral	-2.394	-2.371	97.3394	0.208007	0.506711	10.1796	0.038449	0.588158	DNA-PKCS_A2282Y
DNA-PKCS	3	missense	A22C	DNA-PKCS	22	22	A	C	Saturation-Mutagenesis	-0.679	27.8394	-1.147	Neutral	0.833333	-31	deleterious	-1.386	-3.876	101.273	0.557967	1.22487	13.5189	0.0488799	2.3514	DNA-PKCS_A22C
DNA-PKCS	3	missense	A22D	DNA-PKCS	22	22	A	D	Saturation-Mutagenesis	-1.467	27.8394	-0.954	Neutral	0.833333	17	deleterious	-1.468	-3.955	101.273	0.557967	1.22487	13.5189	0.0488799	2.3514	DNA-PKCS_A22D
DNA-PKCS	3	missense	A22E	DNA-PKCS	22	22	A	E	Saturation-Mutagenesis	-1.623	27.8394	-0.707	Neutral	0.833333	-3	deleterious	-1.435	-2.869	101.273	0.557967	1.22487	13.5189	0.0488799	2.3514	DNA-PKCS_A22E
DNA-PKCS	3	missense	A22F	DNA-PKCS	22	22	A	F	Saturation-Mutagenesis	-0.335	27.8394	-1.388	Neutral	0.833333	11	neutral	-2.521	-2.839	101.273	0.557967	1.22487	13.5189	0.0488799	2.3514	DNA-PKCS_A22F
DNA-PKCS	3	missense	A22G	DNA-PKCS	22	22	A	G	Saturation-Mutagenesis	-0.502	27.8394	-0.27	Neutral	0.833333	-39	deleterious	-1.359	-2.449	101.273	0.557967	1.22487	13.5189	0.0488799	2.3514	DNA-PKCS_A22G
DNA-PKCS	3	missense	A22H	DNA-PKCS	22	22	A	H	Saturation-Mutagenesis	-0.685	27.8394	-1.235	Neutral	0.833333	-21	neutral	-1.47	-2.834	101.273	0.557967	1.22487	13.5189	0.0488799	2.3514	DNA-PKCS_A22H
DNA-PKCS	3	missense	A22I	DNA-PKCS	22	22	A	I	Saturation-Mutagenesis	-0.901	27.8394	-1.026	Neutral	0.833333	-28	neutral	-2.091	-2.129	101.273	0.557967	1.22487	13.5189	0.0488799	2.3514	DNA-PKCS_A22I
DNA-PKCS	3	missense	A22K	DNA-PKCS	22	22	A	K	Saturation-Mutagenesis	-1.541	27.8394	-0.774	Neutral	0.833333	-23	deleterious	-1.574	-3.065	101.273	0.557967	1.22487	13.5189	0.0488799	2.3514	DNA-PKCS_A22K
DNA-PKCS	3	missense	A22L	DNA-PKCS	22	22	A	L	Saturation-Mutagenesis	-0.901	27.8394	-1.135	Neutral	0.833333	-16	deleterious	-1.584	-4.31	101.273	0.557967	1.22487	13.5189	0.0488799	2.3514	DNA-PKCS_A22L
DNA-PKCS	3	missense	A22M	DNA-PKCS	22	22	A	M	Saturation-Mutagenesis	-0.635	27.8394	-0.995	Neutral	0.833333	-18	neutral	-2.521	-3.632	101.273	0.557967	1.22487	13.5189	0.0488799	2.3514	DNA-PKCS_A22M
DNA-PKCS	3	missense	A22N	DNA-PKCS	22	22	A	N	Saturation-Mutagenesis	-1.054	27.8394	-0.568	Neutral	0.833333	-23	deleterious	-1.343	-3.874	101.273	0.557967	1.22487	13.5189	0.0488799	2.3514	DNA-PKCS_A22N
DNA-PKCS	3	missense	A22P	DNA-PKCS	22	22	A	P	Saturation-Mutagenesis	-0.788	27.8394	-0.943	Neutral	0.833333	-1	deleterious	-1.27	-3.677	101.273	0.557967	1.22487	13.5189	0.0488799	2.3514	DNA-PKCS_A22P
DNA-PKCS	3	missense	A22Q	DNA-PKCS	22	22	A	Q	Saturation-Mutagenesis	-1.087	27.8394	-0.857	Neutral	0.833333	-19	deleterious	-1.402	-3.37	101.273	0.557967	1.22487	13.5189	0.0488799	2.3514	DNA-PKCS_A22Q
DNA-PKCS	3	missense	A22R	DNA-PKCS	22	22	A	R	Saturation-Mutagenesis	-1.908	27.8394	-1.085	Neutral	0.833333	-6	neutral	-1.576	-1.75	101.273	0.557967	1.22487	13.5189	0.0488799	2.3514	DNA-PKCS_A22R
DNA-PKCS	3	missense	A22S	DNA-PKCS	22	22	A	S	Saturation-Mutagenesis	-0.603	27.8394	0.137	Neutral	0.833333	-61	deleterious	-2.125	-4.225	101.273	0.557967	1.22487	13.5189	0.0488799	2.3514	DNA-PKCS_A22S
DNA-PKCS	3	missense	A22T	DNA-PKCS	22	22	A	T	Saturation-Mutagenesis	-0.746	27.8394	-0.278	Neutral	0.833333	-53	deleterious	-1.176	-3.14	101.273	0.557967	1.22487	13.5189	0.0488799	2.3514	DNA-PKCS_A22T
DNA-PKCS	3	missense	A22V	DNA-PKCS	22	22	A	V	Saturation-Mutagenesis	-0.788	27.8394	-0.712	Neutral	0.833333	-30	deleterious	-1.608	-4.428	101.273	0.557967	1.22487	13.5189	0.0488799	2.3514	DNA-PKCS_A22V
DNA-PKCS	3	missense	A22W	DNA-PKCS	22	22	A	W	Saturation-Mutagenesis	-0.441	27.8394	-1.856	Neutral	0.833333	58	neutral	-2.521	-3.34	101.273	0.557967	1.22487	13.5189	0.0488799	2.3514	DNA-PKCS_A22W
DNA-PKCS	3	missense	A22Y	DNA-PKCS	22	22	A	Y	Saturation-Mutagenesis	-0.332	27.8394	-1.459	Neutral	0.833333	-1	neutral	-2.521	-3.503	101.273	0.557967	1.22487	13.5189	0.0488799	2.3514	DNA-PKCS_A22Y
DNA-PKCS	3	missense	A2302C	DNA-PKCS	2302	2302	A	C	Saturation-Mutagenesis	-0.7	15.3424	-1.862	Neutral	0.886336	-84	neutral	-1.302	-2.003	96.1249	0.242208	0.683963	11.484	0.0371811	0.741671	DNA-PKCS_A2302C
DNA-PKCS	3	missense	A2302D	DNA-PKCS	2302	2302	A	D	Saturation-Mutagenesis	-0.435	15.3424	-3.302	Deleterious	0.886336	-42	deleterious	-1.302	-4.091	96.1249	0.242208	0.683963	11.484	0.0371811	0.741671	DNA-PKCS_A2302D
DNA-PKCS	3	missense	A2302E	DNA-PKCS	2302	2302	A	E	Saturation-Mutagenesis	-0.248	15.3424	-2.807	Deleterious	0.886336	21	deleterious	-1.302	-4.227	96.1249	0.242208	0.683963	11.484	0.0371811	0.741671	DNA-PKCS_A2302E
DNA-PKCS	3	missense	A2302F	DNA-PKCS	2302	2302	A	F	Saturation-Mutagenesis	-0.243	15.3424	-3.352	Deleterious	0.886336	35	deleterious	-1.106	-4.851	96.1249	0.242208	0.683963	11.484	0.0371811	0.741671	DNA-PKCS_A2302F
DNA-PKCS	3	missense	A2302G	DNA-PKCS	2302	2302	A	G	Saturation-Mutagenesis	-0.43	15.3424	-2.646	Deleterious	0.886336	-54	neutral	-1.302	-1.799	96.1249	0.242208	0.683963	11.484	0.0371811	0.741671	DNA-PKCS_A2302G
DNA-PKCS	3	missense	A2302H	DNA-PKCS	2302	2302	A	H	Saturation-Mutagenesis	-0.194	15.3424	-3.452	Deleterious	0.886336	-13	deleterious	-1.302	-3.579	96.1249	0.242208	0.683963	11.484	0.0371811	0.741671	DNA-PKCS_A2302H
DNA-PKCS	3	missense	A2302I	DNA-PKCS	2302	2302	A	I	Saturation-Mutagenesis	-1.076	15.3424	-2.29	Neutral	0.886336	4	deleterious	-1.302	-3.906	96.1249	0.242208	0.683963	11.484	0.0371811	0.741671	DNA-PKCS_A2302I
DNA-PKCS	3	missense	A2302K	DNA-PKCS	2302	2302	A	K	Saturation-Mutagenesis	-0.447	15.3424	-2.657	Deleterious	0.886336	-39	deleterious	-1.302	-3.353	96.1249	0.242208	0.683963	11.484	0.0371811	0.741671	DNA-PKCS_A2302K
DNA-PKCS	3	missense	A2302L	DNA-PKCS	2302	2302	A	L	Saturation-Mutagenesis	-0.248	15.3424	-2.524	Deleterious	0.886336	-28	deleterious	-1.106	-5.268	96.1249	0.242208	0.683963	11.484	0.0371811	0.741671	DNA-PKCS_A2302L
DNA-PKCS	3	missense	A2302M	DNA-PKCS	2302	2302	A	M	Saturation-Mutagenesis	0.677	15.3424	-2.44	Neutral	0.886336	-4	deleterious	-1.106	-4.104	96.1249	0.242208	0.683963	11.484	0.0371811	0.741671	DNA-PKCS_A2302M
DNA-PKCS	3	missense	A2302N	DNA-PKCS	2302	2302	A	N	Saturation-Mutagenesis	-0.458	15.3424	-3.085	Deleterious	0.886336	-88	deleterious	-1.302	-4.036	96.1249	0.242208	0.683963	11.484	0.0371811	0.741671	DNA-PKCS_A2302N
DNA-PKCS	3	missense	A2302P	DNA-PKCS	2302	2302	A	P	Saturation-Mutagenesis	-0.81	15.3424	-3.04	Deleterious	0.886336	-33	deleterious	-1.302	-3.943	96.1249	0.242208	0.683963	11.484	0.0371811	0.741671	DNA-PKCS_A2302P
DNA-PKCS	3	missense	A2302Q	DNA-PKCS	2302	2302	A	Q	Saturation-Mutagenesis	-0.618	15.3424	-2.724	Deleterious	0.886336	-90	deleterious	-1.302	-3.009	96.1249	0.242208	0.683963	11.484	0.0371811	0.741671	DNA-PKCS_A2302Q
DNA-PKCS	3	missense	A2302R	DNA-PKCS	2302	2302	A	R	Saturation-Mutagenesis	-0.104	15.3424	-2.607	Deleterious	0.886336	-47	deleterious	-1.302	-3.821	96.1249	0.226103	0.570916	10.7663	0.0372051	0.666276	DNA-PKCS_A2302R
DNA-PKCS	3	missense	A2302S	DNA-PKCS	2302	2302	A	S	Saturation-Mutagenesis	-0.382	15.3424	-1.201	Neutral	0.886336	-3	deleterious	-1.302	-4.605	96.1249	0.242208	0.683963	11.484	0.0371811	0.741671	DNA-PKCS_A2302S
DNA-PKCS	3	missense	A2302T	DNA-PKCS	2302	2302	A	T	Saturation-Mutagenesis	-0.618	15.3424	-1.596	Neutral	0.886336	-3	deleterious	-1.302	-3.739	96.1249	0.242208	0.683963	11.484	0.0371811	0.741671	DNA-PKCS_A2302T
DNA-PKCS	3	missense	A2302V	DNA-PKCS	2302	2302	A	V	Saturation-Mutagenesis	-0.827	15.3424	-1.812	Neutral	0.886336	12	deleterious	-1.302	-3.616	96.1249	0.242208	0.683963	11.484	0.0371811	0.741671	DNA-PKCS_A2302V
DNA-PKCS	3	missense	A2302W	DNA-PKCS	2302	2302	A	W	Saturation-Mutagenesis	-0.243	15.3424	-4.313	Deleterious	0.885366	-4	deleterious	-1.106	-3.864	96.1249	0.242208	0.683963	11.484	0.0371811	0.741671	DNA-PKCS_A2302W
DNA-PKCS	3	missense	A2302Y	DNA-PKCS	2302	2302	A	Y	Saturation-Mutagenesis	-0.153	15.3424	-3.318	Deleterious	0.886336	-10	deleterious	-1.106	-3.811	96.1249	0.242208	0.683963	11.484	0.0371811	0.741671	DNA-PKCS_A2302Y
DNA-PKCS	3	missense	A2317C	DNA-PKCS	2317	2317	A	C	Saturation-Mutagenesis	-1.034	3.85431	-2.505	Deleterious	0.851107	5	deleterious	-1.141	-3.629	86.5955	0.252709	0.734844	10.6302	0.0367503	0.744089	DNA-PKCS_A2317C
DNA-PKCS	3	missense	A2317D	DNA-PKCS	2317	2317	A	D	Saturation-Mutagenesis	-1.06	3.85431	-1.955	Neutral	0.851107	-8	deleterious	-1.141	-4.554	86.5955	0.252709	0.734844	10.6302	0.0367503	0.744089	DNA-PKCS_A2317D
DNA-PKCS	3	missense	A2317E	DNA-PKCS	2317	2317	A	E	Saturation-Mutagenesis	-1.089	3.85431	-1.791	Neutral	0.851107	-16	deleterious	-1.141	-2.345	86.5955	0.252709	0.734844	10.6302	0.0367503	0.744089	DNA-PKCS_A2317E
DNA-PKCS	3	missense	A2317F	DNA-PKCS	2317	2317	A	F	Saturation-Mutagenesis	-0.398	3.85431	-3.48	Deleterious	0.851107	5	deleterious	-1.141	-3.527	86.5955	0.252709	0.734844	10.6302	0.0367503	0.744089	DNA-PKCS_A2317F
DNA-PKCS	3	missense	A2317G	DNA-PKCS	2317	2317	A	G	Saturation-Mutagenesis	-1.034	3.85431	-1.963	Neutral	0.851107	24	deleterious	-1.141	-3.727	86.5955	0.252709	0.734844	10.6302	0.0367503	0.744089	DNA-PKCS_A2317G
DNA-PKCS	3	missense	A2317H	DNA-PKCS	2317	2317	A	H	Saturation-Mutagenesis	-0.706	3.85431	-2.884	Deleterious	0.851107	-28	deleterious	-1.435	-3.974	86.5955	0.252709	0.734844	10.6302	0.0367503	0.744089	DNA-PKCS_A2317H
DNA-PKCS	3	missense	A2317I	DNA-PKCS	2317	2317	A	I	Saturation-Mutagenesis	-1.345	3.85431	-2.883	Deleterious	0.851107	25	deleterious	-1.141	-3.063	86.5955	0.252709	0.734844	10.6302	0.0367503	0.744089	DNA-PKCS_A2317I
DNA-PKCS	3	missense	A2317K	DNA-PKCS	2317	2317	A	K	Saturation-Mutagenesis	-0.927	3.85431	-2.191	Neutral	0.851107	-17	deleterious	-1.141	-3.674	86.5955	0.252709	0.734844	10.6302	0.0367503	0.744089	DNA-PKCS_A2317K
DNA-PKCS	3	missense	A2317L	DNA-PKCS	2317	2317	A	L	Saturation-Mutagenesis	-1.516	3.85431	-3.017	Deleterious	0.851107	-8	deleterious	-1.141	-3.514	86.5955	0.252709	0.734844	10.6302	0.0367503	0.744089	DNA-PKCS_A2317L
DNA-PKCS	3	missense	A2317M	DNA-PKCS	2317	2317	A	M	Saturation-Mutagenesis	-0.549	3.85431	-2.721	Deleterious	0.851107	32	deleterious	-1.141	-3.963	86.5955	0.252709	0.734844	10.6302	0.0367503	0.744089	DNA-PKCS_A2317M
DNA-PKCS	3	missense	A2317N	DNA-PKCS	2317	2317	A	N	Saturation-Mutagenesis	-0.634	3.85431	-2.459	Neutral	0.851107	56	deleterious	-1.141	-3.26	86.5955	0.252709	0.734844	10.6302	0.0367503	0.744089	DNA-PKCS_A2317N
DNA-PKCS	3	missense	A2317P	DNA-PKCS	2317	2317	A	P	Saturation-Mutagenesis	-1.167	3.85431	-2.602	Deleterious	0.851107	60	deleterious	-1.141	-5.039	86.5955	0.252709	0.734844	10.6302	0.0367503	0.744089	DNA-PKCS_A2317P
DNA-PKCS	3	missense	A2317Q	DNA-PKCS	2317	2317	A	Q	Saturation-Mutagenesis	-0.892	3.85431	-2.091	Neutral	0.851107	30	deleterious	-1.141	-3.374	86.5955	0.252709	0.734844	10.6302	0.0367503	0.744089	DNA-PKCS_A2317Q
DNA-PKCS	3	missense	A2317R	DNA-PKCS	2317	2317	A	R	Saturation-Mutagenesis	-0.555	3.85431	-2.236	Neutral	0.851107	-28	deleterious	-1.435	-3.749	86.5955	0.205815	0.550454	10.0613	0.0350678	0.56388	DNA-PKCS_A2317R
DNA-PKCS	3	missense	A2317S	DNA-PKCS	2317	2317	A	S	Saturation-Mutagenesis	-0.521	3.85431	-0.946	Neutral	0.851107	21	deleterious	-1.141	-2.299	86.5955	0.252709	0.734844	10.6302	0.0367503	0.744089	DNA-PKCS_A2317S
DNA-PKCS	3	missense	A2317T	DNA-PKCS	2317	2317	A	T	Saturation-Mutagenesis	-0.892	3.85431	-1.831	Neutral	0.851107	10	deleterious	-1.141	-3.171	86.5955	0.252709	0.734844	10.6302	0.0367503	0.744089	DNA-PKCS_A2317T
DNA-PKCS	3	missense	A2317V	DNA-PKCS	2317	2317	A	V	Saturation-Mutagenesis	-0.974	3.85431	-2.383	Neutral	0.851107	23	deleterious	-1.141	-3.271	86.5955	0.252709	0.734844	10.6302	0.0367503	0.744089	DNA-PKCS_A2317V
DNA-PKCS	3	missense	A2317W	DNA-PKCS	2317	2317	A	W	Saturation-Mutagenesis	0.194	3.85431	-4.255	Deleterious	0.851107	55	deleterious	-1.141	-4.391	86.5955	0.252709	0.734844	10.6302	0.0367503	0.744089	DNA-PKCS_A2317W
DNA-PKCS	3	missense	A2317Y	DNA-PKCS	2317	2317	A	Y	Saturation-Mutagenesis	-0.5	3.85431	-3.414	Deleterious	0.851107	-5	deleterious	-1.141	-4.649	86.5955	0.252709	0.734844	10.6302	0.0367503	0.744089	DNA-PKCS_A2317Y
DNA-PKCS	3	missense	A2318C	DNA-PKCS	2318	2318	A	C	Saturation-Mutagenesis	-0.828	4.82662	-3.079	Deleterious	0.851107	-51	deleterious	-1.4	-3.834	81.7775	0.276684	0.835837	10.9444	0.0382096	0.796732	DNA-PKCS_A2318C
DNA-PKCS	3	missense	A2318D	DNA-PKCS	2318	2318	A	D	Saturation-Mutagenesis	-0.431	4.82662	-4.302	Deleterious	0.851107	-78	deleterious	-1.4	-3.507	81.7775	0.276684	0.835837	10.9444	0.0382096	0.796732	DNA-PKCS_A2318D
DNA-PKCS	3	missense	A2318E	DNA-PKCS	2318	2318	A	E	Saturation-Mutagenesis	-0.439	4.82662	-3.59	Deleterious	0.851107	-76	deleterious	-1.4	-3.567	81.7775	0.276684	0.835837	10.9444	0.0382096	0.796732	DNA-PKCS_A2318E
DNA-PKCS	3	missense	A2318F	DNA-PKCS	2318	2318	A	F	Saturation-Mutagenesis	-0.184	4.82662	-4.635	Deleterious	0.851107	-30	deleterious	-1.4	-3.217	81.7775	0.276684	0.835837	10.9444	0.0382096	0.796732	DNA-PKCS_A2318F
DNA-PKCS	3	missense	A2318G	DNA-PKCS	2318	2318	A	G	Saturation-Mutagenesis	-0.943	4.82662	-3.012	Deleterious	0.851107	-64	deleterious	-1.4	-4.856	81.7775	0.276684	0.835837	10.9444	0.0382096	0.796732	DNA-PKCS_A2318G
DNA-PKCS	3	missense	A2318H	DNA-PKCS	2318	2318	A	H	Saturation-Mutagenesis	-0.301	4.82662	-4.435	Deleterious	0.851107	18	deleterious	-1.4	-3.79	81.7775	0.276684	0.835837	10.9444	0.0382096	0.796732	DNA-PKCS_A2318H
DNA-PKCS	3	missense	A2318I	DNA-PKCS	2318	2318	A	I	Saturation-Mutagenesis	-0.206	4.82662	-3.79	Deleterious	0.851107	-77	deleterious	-1.4	-3.16	81.7775	0.276684	0.835837	10.9444	0.0382096	0.796732	DNA-PKCS_A2318I
DNA-PKCS	3	missense	A2318K	DNA-PKCS	2318	2318	A	K	Saturation-Mutagenesis	-0.277	4.82662	-3.59	Deleterious	0.851107	-58	deleterious	-1.4	-3.98	81.7775	0.276684	0.835837	10.9444	0.0382096	0.796732	DNA-PKCS_A2318K
DNA-PKCS	3	missense	A2318L	DNA-PKCS	2318	2318	A	L	Saturation-Mutagenesis	-0.471	4.82662	-3.79	Deleterious	0.851107	-75	deleterious	-1.4	-3.322	81.7775	0.276684	0.835837	10.9444	0.0382096	0.796732	DNA-PKCS_A2318L
DNA-PKCS	3	missense	A2318M	DNA-PKCS	2318	2318	A	M	Saturation-Mutagenesis	0.732	4.82662	-3.69	Deleterious	0.851107	-46	deleterious	-1.4	-3.644	81.7775	0.276684	0.835837	10.9444	0.0382096	0.796732	DNA-PKCS_A2318M
DNA-PKCS	3	missense	A2318N	DNA-PKCS	2318	2318	A	N	Saturation-Mutagenesis	-0.722	4.82662	-4.368	Deleterious	0.851107	43	deleterious	-1.4	-2.403	81.7775	0.276684	0.835837	10.9444	0.0382096	0.796732	DNA-PKCS_A2318N
DNA-PKCS	3	missense	A2318P	DNA-PKCS	2318	2318	A	P	Saturation-Mutagenesis	-0.253	4.82662	-2.79	Deleterious	0.851107	-53	deleterious	-1.4	-3.359	81.7775	0.276684	0.835837	10.9444	0.0382096	0.796732	DNA-PKCS_A2318P
DNA-PKCS	3	missense	A2318Q	DNA-PKCS	2318	2318	A	Q	Saturation-Mutagenesis	-0.828	4.82662	-3.59	Deleterious	0.851107	-57	deleterious	-1.4	-2.484	81.7775	0.276684	0.835837	10.9444	0.0382096	0.796732	DNA-PKCS_A2318Q
DNA-PKCS	3	missense	A2318R	DNA-PKCS	2318	2318	A	R	Saturation-Mutagenesis	0.091	4.82662	-3.69	Deleterious	0.851107	39	deleterious	-1.141	-4.3	81.7775	0.252709	0.734844	10.6302	0.0367503	0.744089	DNA-PKCS_A2318R
DNA-PKCS	3	missense	A2318S	DNA-PKCS	2318	2318	A	S	Saturation-Mutagenesis	-0.722	4.82662	-2.101	Neutral	0.851107	-19	deleterious	-1.4	-3.49	81.7775	0.276684	0.835837	10.9444	0.0382096	0.796732	DNA-PKCS_A2318S
DNA-PKCS	3	missense	A2318T	DNA-PKCS	2318	2318	A	T	Saturation-Mutagenesis	-0.526	4.82662	-2.679	Deleterious	0.851107	-17	deleterious	-1.4	-3.304	81.7775	0.276684	0.835837	10.9444	0.0382096	0.796732	DNA-PKCS_A2318T
DNA-PKCS	3	missense	A2318V	DNA-PKCS	2318	2318	A	V	Saturation-Mutagenesis	-0.251	4.82662	-2.946	Deleterious	0.851107	-47	deleterious	-1.4	-2.459	81.7775	0.276684	0.835837	10.9444	0.0382096	0.796732	DNA-PKCS_A2318V
DNA-PKCS	3	missense	A2318W	DNA-PKCS	2318	2318	A	W	Saturation-Mutagenesis	-0.009	4.82662	-5.346	Deleterious	0.802985	-38	deleterious	-1.4	-3.306	81.7775	0.276684	0.835837	10.9444	0.0382096	0.796732	DNA-PKCS_A2318W
DNA-PKCS	3	missense	A2318Y	DNA-PKCS	2318	2318	A	Y	Saturation-Mutagenesis	0.078	4.82662	-4.535	Deleterious	0.851107	-62	deleterious	-1.4	-4.512	81.7775	0.276684	0.835837	10.9444	0.0382096	0.796732	DNA-PKCS_A2318Y
DNA-PKCS	3	missense	A2319C	DNA-PKCS	2319	2319	A	C	Saturation-Mutagenesis	-0.244	7.59643	-3.039	Deleterious	0.802985	-55	deleterious	-1.633	-3.198	86.4101	0.327321	0.866175	11.9677	0.0460519	0.997967	DNA-PKCS_A2319C
DNA-PKCS	3	missense	A2319D	DNA-PKCS	2319	2319	A	D	Saturation-Mutagenesis	-0.122	7.59643	-4.534	Deleterious	0.802985	-9	deleterious	-1.633	-3.231	86.4101	0.327321	0.866175	11.9677	0.0460519	0.997967	DNA-PKCS_A2319D
DNA-PKCS	3	missense	A2319E	DNA-PKCS	2319	2319	A	E	Saturation-Mutagenesis	0.166	7.59643	-3.776	Deleterious	0.802985	-13	neutral	-1.633	-1.907	86.4101	0.327321	0.866175	11.9677	0.0460519	0.997967	DNA-PKCS_A2319E
DNA-PKCS	3	missense	A2319F	DNA-PKCS	2319	2319	A	F	Saturation-Mutagenesis	-0.788	7.59643	-4.575	Deleterious	0.802985	-56	deleterious	-1.633	-4.172	86.4101	0.327321	0.866175	11.9677	0.0460519	0.997967	DNA-PKCS_A2319F
DNA-PKCS	3	missense	A2319G	DNA-PKCS	2319	2319	A	G	Saturation-Mutagenesis	0.043	7.59643	-3.152	Deleterious	0.802985	-48	deleterious	-1.633	-3.827	86.4101	0.327321	0.866175	11.9677	0.0460519	0.997967	DNA-PKCS_A2319G
DNA-PKCS	3	missense	A2319H	DNA-PKCS	2319	2319	A	H	Saturation-Mutagenesis	-0.048	7.59643	-4.621	Deleterious	0.802985	-29	deleterious	-1.633	-3.097	86.4101	0.327321	0.866175	11.9677	0.0460519	0.997967	DNA-PKCS_A2319H
DNA-PKCS	3	missense	A2319I	DNA-PKCS	2319	2319	A	I	Saturation-Mutagenesis	0.565	7.59643	-3.65	Deleterious	0.802985	-79	deleterious	-1.633	-3.845	86.4101	0.327321	0.866175	11.9677	0.0460519	0.997967	DNA-PKCS_A2319I
DNA-PKCS	3	missense	A2319K	DNA-PKCS	2319	2319	A	K	Saturation-Mutagenesis	-0.218	7.59643	-3.776	Deleterious	0.802985	-30	neutral	-1.633	-2.52	86.4101	0.327321	0.866175	11.9677	0.0460519	0.997967	DNA-PKCS_A2319K
DNA-PKCS	3	missense	A2319L	DNA-PKCS	2319	2319	A	L	Saturation-Mutagenesis	-0.933	7.59643	-3.717	Deleterious	0.802985	-75	deleterious	-1.633	-3.304	86.4101	0.327321	0.866175	11.9677	0.0460519	0.997967	DNA-PKCS_A2319L
DNA-PKCS	3	missense	A2319M	DNA-PKCS	2319	2319	A	M	Saturation-Mutagenesis	0.132	7.59643	-3.696	Deleterious	0.802985	-59	neutral	-1.633	-2.966	86.4101	0.327321	0.866175	11.9677	0.0460519	0.997967	DNA-PKCS_A2319M
DNA-PKCS	3	missense	A2319N	DNA-PKCS	2319	2319	A	N	Saturation-Mutagenesis	-0.248	7.59643	-4.447	Deleterious	0.802985	48	deleterious	-1.633	-3.614	86.4101	0.327321	0.866175	11.9677	0.0460519	0.997967	DNA-PKCS_A2319N
DNA-PKCS	3	missense	A2319P	DNA-PKCS	2319	2319	A	P	Saturation-Mutagenesis	0.501	7.59643	-3.796	Deleterious	0.802985	-22	deleterious	-1.633	-3.012	86.4101	0.327321	0.866175	11.9677	0.0460519	0.997967	DNA-PKCS_A2319P
DNA-PKCS	3	missense	A2319Q	DNA-PKCS	2319	2319	A	Q	Saturation-Mutagenesis	-0.244	7.59643	-3.776	Deleterious	0.802985	-47	deleterious	-1.633	-4.931	86.4101	0.327321	0.866175	11.9677	0.0460519	0.997967	DNA-PKCS_A2319Q
DNA-PKCS	3	missense	A2319R	DNA-PKCS	2319	2319	A	R	Saturation-Mutagenesis	-0.002	7.59643	-3.83	Deleterious	0.802985	-56	deleterious	-1.633	-4.36	86.4101	0.276684	0.835837	10.9444	0.0382096	0.796732	DNA-PKCS_A2319R
DNA-PKCS	3	missense	A2319S	DNA-PKCS	2319	2319	A	S	Saturation-Mutagenesis	-0.248	7.59643	-2.113	Neutral	0.802985	2	deleterious	-1.633	-3.294	86.4101	0.327321	0.866175	11.9677	0.0460519	0.997967	DNA-PKCS_A2319S
DNA-PKCS	3	missense	A2319T	DNA-PKCS	2319	2319	A	T	Saturation-Mutagenesis	-0.27	7.59643	-2.565	Deleterious	0.802985	-6	neutral	-1.633	-2.53	86.4101	0.327321	0.866175	11.9677	0.0460519	0.997967	DNA-PKCS_A2319T
DNA-PKCS	3	missense	A2319V	DNA-PKCS	2319	2319	A	V	Saturation-Mutagenesis	0.541	7.59643	-2.825	Deleterious	0.802985	-42	deleterious	-1.633	-3.589	86.4101	0.327321	0.866175	11.9677	0.0460519	0.997967	DNA-PKCS_A2319V
DNA-PKCS	3	missense	A2319W	DNA-PKCS	2319	2319	A	W	Saturation-Mutagenesis	-0.266	7.59643	-5.386	Deleterious	0.79901	-67	deleterious	-1.297	-4.021	86.4101	0.327321	0.866175	11.9677	0.0460519	0.997967	DNA-PKCS_A2319W
DNA-PKCS	3	missense	A2319Y	DNA-PKCS	2319	2319	A	Y	Saturation-Mutagenesis	-0.179	7.59643	-4.575	Deleterious	0.802985	-45	deleterious	-1.633	-4.195	86.4101	0.327321	0.866175	11.9677	0.0460519	0.997967	DNA-PKCS_A2319Y
DNA-PKCS	3	missense	A2320C	DNA-PKCS	2320	2320	A	C	Saturation-Mutagenesis	-0.605	7.24443	-3.046	Deleterious	0.79901	-21	deleterious	-1.297	-3.727	87.878	0.249687	0.585016	10.5275	0.0391572	0.713043	DNA-PKCS_A2320C
DNA-PKCS	3	missense	A2320D	DNA-PKCS	2320	2320	A	D	Saturation-Mutagenesis	-0.553	7.24443	-4.235	Deleterious	0.79901	-32	deleterious	-1.297	-3.809	87.878	0.249687	0.585016	10.5275	0.0391572	0.713043	DNA-PKCS_A2320D
DNA-PKCS	3	missense	A2320E	DNA-PKCS	2320	2320	A	E	Saturation-Mutagenesis	-0.259	7.24443	-3.557	Deleterious	0.79901	-42	deleterious	-1.297	-3.597	87.878	0.249687	0.585016	10.5275	0.0391572	0.713043	DNA-PKCS_A2320E
DNA-PKCS	3	missense	A2320F	DNA-PKCS	2320	2320	A	F	Saturation-Mutagenesis	-0.485	7.24443	-4.568	Deleterious	0.79901	-19	deleterious	-1.297	-3.923	87.878	0.249687	0.585016	10.5275	0.0391572	0.713043	DNA-PKCS_A2320F
DNA-PKCS	3	missense	A2320G	DNA-PKCS	2320	2320	A	G	Saturation-Mutagenesis	-0.58	7.24443	-2.879	Deleterious	0.79901	-23	deleterious	-1.297	-4.024	87.878	0.249687	0.585016	10.5275	0.0391572	0.713043	DNA-PKCS_A2320G
DNA-PKCS	3	missense	A2320H	DNA-PKCS	2320	2320	A	H	Saturation-Mutagenesis	-0.543	7.24443	-4.402	Deleterious	0.79901	-48	deleterious	-1.297	-3.71	87.878	0.249687	0.585016	10.5275	0.0391572	0.713043	DNA-PKCS_A2320H
DNA-PKCS	3	missense	A2320I	DNA-PKCS	2320	2320	A	I	Saturation-Mutagenesis	-0.38	7.24443	-3.89	Deleterious	0.79901	-61	neutral	-1.297	-2.021	87.878	0.249687	0.585016	10.5275	0.0391572	0.713043	DNA-PKCS_A2320I
DNA-PKCS	3	missense	A2320K	DNA-PKCS	2320	2320	A	K	Saturation-Mutagenesis	-0.648	7.24443	-3.557	Deleterious	0.79901	-46	deleterious	-1.297	-4.016	87.878	0.249687	0.585016	10.5275	0.0391572	0.713043	DNA-PKCS_A2320K
DNA-PKCS	3	missense	A2320L	DNA-PKCS	2320	2320	A	L	Saturation-Mutagenesis	-0.203	7.24443	-3.89	Deleterious	0.79901	-53	deleterious	-1.297	-3.892	87.878	0.249687	0.585016	10.5275	0.0391572	0.713043	DNA-PKCS_A2320L
DNA-PKCS	3	missense	A2320M	DNA-PKCS	2320	2320	A	M	Saturation-Mutagenesis	-0.38	7.24443	-3.724	Deleterious	0.79901	-23	deleterious	-1.297	-3.66	87.878	0.249687	0.585016	10.5275	0.0391572	0.713043	DNA-PKCS_A2320M
DNA-PKCS	3	missense	A2320N	DNA-PKCS	2320	2320	A	N	Saturation-Mutagenesis	-0.148	7.24443	-4.068	Deleterious	0.79901	45	deleterious	-1.297	-4.153	87.878	0.249687	0.585016	10.5275	0.0391572	0.713043	DNA-PKCS_A2320N
DNA-PKCS	3	missense	A2320P	DNA-PKCS	2320	2320	A	P	Saturation-Mutagenesis	-0.385	7.24443	-3.724	Deleterious	0.79901	17	deleterious	-1.297	-2.997	87.878	0.249687	0.585016	10.5275	0.0391572	0.713043	DNA-PKCS_A2320P
DNA-PKCS	3	missense	A2320Q	DNA-PKCS	2320	2320	A	Q	Saturation-Mutagenesis	-0.287	7.24443	-3.557	Deleterious	0.79901	-6	deleterious	-1.297	-4.623	87.878	0.249687	0.585016	10.5275	0.0391572	0.713043	DNA-PKCS_A2320Q
DNA-PKCS	3	missense	A2320R	DNA-PKCS	2320	2320	A	R	Saturation-Mutagenesis	-0.486	7.24443	-3.724	Deleterious	0.79901	-41	deleterious	-1.297	-4.891	87.878	0.327321	0.866175	11.9677	0.0460519	0.997967	DNA-PKCS_A2320R
DNA-PKCS	3	missense	A2320S	DNA-PKCS	2320	2320	A	S	Saturation-Mutagenesis	-0.729	7.24443	-1.534	Neutral	0.79901	-3	deleterious	-1.297	-3.341	87.878	0.249687	0.585016	10.5275	0.0391572	0.713043	DNA-PKCS_A2320S
DNA-PKCS	3	missense	A2320T	DNA-PKCS	2320	2320	A	T	Saturation-Mutagenesis	-0.746	7.24443	-2.712	Deleterious	0.79901	-21	deleterious	-1.297	-4.109	87.878	0.249687	0.585016	10.5275	0.0391572	0.713043	DNA-PKCS_A2320T
DNA-PKCS	3	missense	A2320V	DNA-PKCS	2320	2320	A	V	Saturation-Mutagenesis	-0.134	7.24443	-3.212	Deleterious	0.79901	-3	neutral	-1.297	-1.785	87.878	0.249687	0.585016	10.5275	0.0391572	0.713043	DNA-PKCS_A2320V
DNA-PKCS	3	missense	A2320W	DNA-PKCS	2320	2320	A	W	Saturation-Mutagenesis	0.026	7.24443	-5.413	Deleterious	0.770192	-39	deleterious	-1.356	-4.397	87.878	0.249687	0.585016	10.5275	0.0391572	0.713043	DNA-PKCS_A2320W
DNA-PKCS	3	missense	A2320Y	DNA-PKCS	2320	2320	A	Y	Saturation-Mutagenesis	-0.396	7.24443	-4.568	Deleterious	0.79901	-31	deleterious	-1.356	-3.943	87.878	0.249687	0.585016	10.5275	0.0391572	0.713043	DNA-PKCS_A2320Y
DNA-PKCS	3	missense	A2346C	DNA-PKCS	2346	2346	A	C	Saturation-Mutagenesis	-0.364	19.2587	-1.357	Neutral	0.764917	-35	neutral	-2.33	-3.745	74.7557	0.239773	0.622915	10.3102	0.0364621	0.652612	DNA-PKCS_A2346C
DNA-PKCS	3	missense	A2346D	DNA-PKCS	2346	2346	A	D	Saturation-Mutagenesis	0.336	19.2587	-1.497	Neutral	0.764917	19	neutral	-2.33	-3.624	74.7557	0.239773	0.622915	10.3102	0.0364621	0.652612	DNA-PKCS_A2346D
DNA-PKCS	3	missense	A2346E	DNA-PKCS	2346	2346	A	E	Saturation-Mutagenesis	-0.611	19.2587	-0.999	Neutral	0.764917	15	deleterious	-2.33	-3.997	74.7557	0.239773	0.622915	10.3102	0.0364621	0.652612	DNA-PKCS_A2346E
DNA-PKCS	3	missense	A2346F	DNA-PKCS	2346	2346	A	F	Saturation-Mutagenesis	-0.52	19.2587	-0.921	Neutral	0.764917	-18	deleterious	-1.275	-2.295	74.7557	0.239773	0.622915	10.3102	0.0364621	0.652612	DNA-PKCS_A2346F
DNA-PKCS	3	missense	A2346G	DNA-PKCS	2346	2346	A	G	Saturation-Mutagenesis	-0.394	19.2587	-1.381	Neutral	0.764917	-43	deleterious	-2.33	-4.003	74.7557	0.239773	0.622915	10.3102	0.0364621	0.652612	DNA-PKCS_A2346G
DNA-PKCS	3	missense	A2346H	DNA-PKCS	2346	2346	A	H	Saturation-Mutagenesis	-0.272	19.2587	-1.412	Neutral	0.764917	-1	deleterious	-2.33	-4.062	74.7557	0.239773	0.622915	10.3102	0.0364621	0.652612	DNA-PKCS_A2346H
DNA-PKCS	3	missense	A2346I	DNA-PKCS	2346	2346	A	I	Saturation-Mutagenesis	-0.324	19.2587	-0.058	Neutral	0.764917	-62	deleterious	-1.275	-3.4	74.7557	0.239773	0.622915	10.3102	0.0364621	0.652612	DNA-PKCS_A2346I
DNA-PKCS	3	missense	A2346K	DNA-PKCS	2346	2346	A	K	Saturation-Mutagenesis	0.386	19.2587	-0.964	Neutral	0.764917	-10	deleterious	-2.33	-4.656	74.7557	0.239773	0.622915	10.3102	0.0364621	0.652612	DNA-PKCS_A2346K
DNA-PKCS	3	missense	A2346L	DNA-PKCS	2346	2346	A	L	Saturation-Mutagenesis	-0.458	19.2587	-0.369	Neutral	0.764917	-50	deleterious	-1.275	-3.433	74.7557	0.239773	0.622915	10.3102	0.0364621	0.652612	DNA-PKCS_A2346L
DNA-PKCS	3	missense	A2346M	DNA-PKCS	2346	2346	A	M	Saturation-Mutagenesis	-0.52	19.2587	-0.455	Neutral	0.764917	-36	deleterious	-1.275	-3.383	74.7557	0.239773	0.622915	10.3102	0.0364621	0.652612	DNA-PKCS_A2346M
DNA-PKCS	3	missense	A2346N	DNA-PKCS	2346	2346	A	N	Saturation-Mutagenesis	-0.247	19.2587	-1.278	Neutral	0.764917	69	neutral	-2.33	-2.192	74.7557	0.239773	0.622915	10.3102	0.0364621	0.652612	DNA-PKCS_A2346N
DNA-PKCS	3	missense	A2346P	DNA-PKCS	2346	2346	A	P	Saturation-Mutagenesis	-0.255	19.2587	-1.315	Neutral	0.764917	-14	deleterious	-1.275	-3.682	74.7557	0.239773	0.622915	10.3102	0.0364621	0.652612	DNA-PKCS_A2346P
DNA-PKCS	3	missense	A2346Q	DNA-PKCS	2346	2346	A	Q	Saturation-Mutagenesis	-0.207	19.2587	-1.079	Neutral	0.764917	-33	neutral	-2.33	-1.587	74.7557	0.239773	0.622915	10.3102	0.0364621	0.652612	DNA-PKCS_A2346Q
DNA-PKCS	3	missense	A2346R	DNA-PKCS	2346	2346	A	R	Saturation-Mutagenesis	-0.169	19.2587	-1.162	Neutral	0.764917	-37	deleterious	-2.33	-4.092	74.7557	0.213513	0.602347	10.0045	0.0331581	0.614108	DNA-PKCS_A2346R
DNA-PKCS	3	missense	A2346S	DNA-PKCS	2346	2346	A	S	Saturation-Mutagenesis	-0.633	19.2587	-0.621	Neutral	0.764917	26	neutral	-2.33	-2.374	74.7557	0.239773	0.622915	10.3102	0.0364621	0.652612	DNA-PKCS_A2346S
DNA-PKCS	3	missense	A2346T	DNA-PKCS	2346	2346	A	T	Saturation-Mutagenesis	-0.218	19.2587	-0.092	Neutral	0.764917	13	neutral	-2.33	-1.936	74.7557	0.239773	0.622915	10.3102	0.0364621	0.652612	DNA-PKCS_A2346T
DNA-PKCS	2	missense	A2346V	DNA-PKCS	2346	2346	A	V	Non-Pathogenic	-0.458	19.2587	0.297	Neutral	0.764917	-25	deleterious	-1.275	-4.478	74.7557	0.239773	0.622915	10.3102	0.0364621	0.652612	DNA-PKCS_A2346V
DNA-PKCS	3	missense	A2346W	DNA-PKCS	2346	2346	A	W	Saturation-Mutagenesis	-0.474	19.2587	-2.225	Neutral	0.786298	-3	deleterious	-1.275	-2.227	74.7557	0.239773	0.622915	10.3102	0.0364621	0.652612	DNA-PKCS_A2346W
DNA-PKCS	3	missense	A2346Y	DNA-PKCS	2346	2346	A	Y	Saturation-Mutagenesis	-0.114	19.2587	-1.225	Neutral	0.764917	-24	deleterious	-1.275	-3.208	74.7557	0.239773	0.622915	10.3102	0.0364621	0.652612	DNA-PKCS_A2346Y
DNA-PKCS	3	missense	A2375C	DNA-PKCS	2375	2375	A	C	Saturation-Mutagenesis	-0.781	18.4126	-1.562	Neutral	0.901773	-33	neutral	-1.651	-3.424	70.2971	0.237702	0.678407	10.8253	0.0365177	0.742321	DNA-PKCS_A2375C
DNA-PKCS	3	missense	A2375D	DNA-PKCS	2375	2375	A	D	Saturation-Mutagenesis	-0.259	18.4126	-3.485	Deleterious	0.901773	4	deleterious	-1.721	-3.721	70.2971	0.237702	0.678407	10.8253	0.0365177	0.742321	DNA-PKCS_A2375D
DNA-PKCS	3	missense	A2375E	DNA-PKCS	2375	2375	A	E	Saturation-Mutagenesis	-1.107	18.4126	-2.79	Deleterious	0.901773	-2	neutral	-1.651	-4.363	70.2971	0.237702	0.678407	10.8253	0.0365177	0.742321	DNA-PKCS_A2375E
DNA-PKCS	3	missense	A2375F	DNA-PKCS	2375	2375	A	F	Saturation-Mutagenesis	-0.926	18.4126	-2.635	Deleterious	0.901773	-11	neutral	-1.651	-3.642	70.2971	0.237702	0.678407	10.8253	0.0365177	0.742321	DNA-PKCS_A2375F
DNA-PKCS	3	missense	A2375G	DNA-PKCS	2375	2375	A	G	Saturation-Mutagenesis	-0.838	18.4126	-2.712	Deleterious	0.901773	-38	neutral	-1.651	-3.419	70.2971	0.237702	0.678407	10.8253	0.0365177	0.742321	DNA-PKCS_A2375G
DNA-PKCS	3	missense	A2375H	DNA-PKCS	2375	2375	A	H	Saturation-Mutagenesis	-1.109	18.4126	-3.402	Deleterious	0.901773	-15	deleterious	-1.721	-4.072	70.2971	0.237702	0.678407	10.8253	0.0365177	0.742321	DNA-PKCS_A2375H
DNA-PKCS	3	missense	A2375I	DNA-PKCS	2375	2375	A	I	Saturation-Mutagenesis	-0.782	18.4126	-1.157	Neutral	0.901773	-65	neutral	-1.651	-3.329	70.2971	0.237702	0.678407	10.8253	0.0365177	0.742321	DNA-PKCS_A2375I
DNA-PKCS	3	missense	A2375K	DNA-PKCS	2375	2375	A	K	Saturation-Mutagenesis	-1.316	18.4126	-2.624	Deleterious	0.901773	-5	neutral	-1.721	-2.3	70.2971	0.237702	0.678407	10.8253	0.0365177	0.742321	DNA-PKCS_A2375K
DNA-PKCS	3	missense	A2375L	DNA-PKCS	2375	2375	A	L	Saturation-Mutagenesis	-0.522	18.4126	-1.324	Neutral	0.901773	-63	neutral	-1.651	-3.74	70.2971	0.237702	0.678407	10.8253	0.0365177	0.742321	DNA-PKCS_A2375L
DNA-PKCS	3	missense	A2375M	DNA-PKCS	2375	2375	A	M	Saturation-Mutagenesis	-0.782	18.4126	-1.39	Neutral	0.901773	-28	neutral	-1.651	-3.106	70.2971	0.237702	0.678407	10.8253	0.0365177	0.742321	DNA-PKCS_A2375M
DNA-PKCS	3	missense	A2375N	DNA-PKCS	2375	2375	A	N	Saturation-Mutagenesis	-0.304	18.4126	-3.302	Deleterious	0.901773	56	neutral	-1.651	-3.041	70.2971	0.237702	0.678407	10.8253	0.0365177	0.742321	DNA-PKCS_A2375N
DNA-PKCS	3	missense	A2375P	DNA-PKCS	2375	2375	A	P	Saturation-Mutagenesis	-0.929	18.4126	-2.79	Deleterious	0.901773	-32	neutral	-1.651	-3.478	70.2971	0.237702	0.678407	10.8253	0.0365177	0.742321	DNA-PKCS_A2375P
DNA-PKCS	3	missense	A2375Q	DNA-PKCS	2375	2375	A	Q	Saturation-Mutagenesis	-0.487	18.4126	-2.59	Deleterious	0.901773	-26	neutral	-1.651	-3.246	70.2971	0.237702	0.678407	10.8253	0.0365177	0.742321	DNA-PKCS_A2375Q
DNA-PKCS	3	missense	A2375R	DNA-PKCS	2375	2375	A	R	Saturation-Mutagenesis	-0.882	18.4126	-2.857	Deleterious	0.901773	-6	neutral	-1.721	-1.967	70.2971	0.522509	1.03764	13.4674	0.0504878	1.26139	DNA-PKCS_A2375R
DNA-PKCS	3	missense	A2375S	DNA-PKCS	2375	2375	A	S	Saturation-Mutagenesis	-0.901	18.4126	-1.601	Neutral	0.901773	14	neutral	-1.651	-1.407	70.2971	0.237702	0.678407	10.8253	0.0365177	0.742321	DNA-PKCS_A2375S
DNA-PKCS	3	missense	A2375T	DNA-PKCS	2375	2375	A	T	Saturation-Mutagenesis	-1.08	18.4126	-1.529	Neutral	0.901773	10	neutral	-1.651	-2.461	70.2971	0.237702	0.678407	10.8253	0.0365177	0.742321	DNA-PKCS_A2375T
DNA-PKCS	3	missense	A2375V	DNA-PKCS	2375	2375	A	V	Saturation-Mutagenesis	-0.41	18.4126	-0.646	Neutral	0.901773	-32	deleterious	-1.651	-5.09	70.2971	0.237702	0.678407	10.8253	0.0365177	0.742321	DNA-PKCS_A2375V
DNA-PKCS	3	missense	A2375W	DNA-PKCS	2375	2375	A	W	Saturation-Mutagenesis	-0.794	18.4126	-3.696	Deleterious	0.907076	-13	neutral	-1.651	-3.408	70.2971	0.237702	0.678407	10.8253	0.0365177	0.742321	DNA-PKCS_A2375W
DNA-PKCS	3	missense	A2375Y	DNA-PKCS	2375	2375	A	Y	Saturation-Mutagenesis	-1.106	18.4126	-2.768	Deleterious	0.901773	-42	neutral	-1.651	-4.013	70.2971	0.237702	0.678407	10.8253	0.0365177	0.742321	DNA-PKCS_A2375Y
DNA-PKCS	3	missense	A2381C	DNA-PKCS	2381	2381	A	C	Saturation-Mutagenesis	-0.839	18.5908	-1.891	Neutral	0.88756	-38	deleterious	-1.177	-3.526	61.5913	0.235942	0.592357	9.59661	0.0347664	0.664717	DNA-PKCS_A2381C
DNA-PKCS	3	missense	A2381D	DNA-PKCS	2381	2381	A	D	Saturation-Mutagenesis	0.639	18.5908	-1.974	Neutral	0.88756	30	deleterious	-1.177	-3.573	61.5913	0.235942	0.592357	9.59661	0.0347664	0.664717	DNA-PKCS_A2381D
DNA-PKCS	3	missense	A2381E	DNA-PKCS	2381	2381	A	E	Saturation-Mutagenesis	-0.1	18.5908	-1.022	Neutral	0.88756	30	deleterious	-1.177	-3.553	61.5913	0.235942	0.592357	9.59661	0.0347664	0.664717	DNA-PKCS_A2381E
DNA-PKCS	3	missense	A2381F	DNA-PKCS	2381	2381	A	F	Saturation-Mutagenesis	0.115	18.5908	-2.304	Neutral	0.88756	-32	deleterious	-1.177	-2.337	61.5913	0.235942	0.592357	9.59661	0.0347664	0.664717	DNA-PKCS_A2381F
DNA-PKCS	3	missense	A2381G	DNA-PKCS	2381	2381	A	G	Saturation-Mutagenesis	-0.61	18.5908	-1.8	Neutral	0.88756	-33	deleterious	-1.177	-4.073	61.5913	0.235942	0.592357	9.59661	0.0347664	0.664717	DNA-PKCS_A2381G
DNA-PKCS	3	missense	A2381H	DNA-PKCS	2381	2381	A	H	Saturation-Mutagenesis	0.056	18.5908	-1.312	Neutral	0.88756	28	deleterious	-1.177	-3.65	61.5913	0.235942	0.592357	9.59661	0.0347664	0.664717	DNA-PKCS_A2381H
DNA-PKCS	3	missense	A2381I	DNA-PKCS	2381	2381	A	I	Saturation-Mutagenesis	-0.342	18.5908	-1.718	Neutral	0.88756	-51	deleterious	-1.177	-3.592	61.5913	0.235942	0.592357	9.59661	0.0347664	0.664717	DNA-PKCS_A2381I
DNA-PKCS	3	missense	A2381K	DNA-PKCS	2381	2381	A	K	Saturation-Mutagenesis	-0.069	18.5908	-0.145	Neutral	0.88756	25	deleterious	-1.177	-3.803	61.5913	0.235942	0.592357	9.59661	0.0347664	0.664717	DNA-PKCS_A2381K
DNA-PKCS	3	missense	A2381L	DNA-PKCS	2381	2381	A	L	Saturation-Mutagenesis	-0.028	18.5908	-1.635	Neutral	0.88756	-43	deleterious	-1.177	-3.164	61.5913	0.235942	0.592357	9.59661	0.0347664	0.664717	DNA-PKCS_A2381L
DNA-PKCS	3	missense	A2381M	DNA-PKCS	2381	2381	A	M	Saturation-Mutagenesis	0.115	18.5908	-1.293	Neutral	0.88756	-46	deleterious	-1.177	-4.478	61.5913	0.235942	0.592357	9.59661	0.0347664	0.664717	DNA-PKCS_A2381M
DNA-PKCS	3	missense	A2381N	DNA-PKCS	2381	2381	A	N	Saturation-Mutagenesis	-1.038	18.5908	-1.442	Neutral	0.88756	62	deleterious	-1.177	-3.889	61.5913	0.235942	0.592357	9.59661	0.0347664	0.664717	DNA-PKCS_A2381N
DNA-PKCS	2	missense	A2381P	DNA-PKCS	2381	2381	A	P	Non-Pathogenic	-0.507	18.5908	-1.465	Neutral	0.88756	-64	deleterious	-1.177	-3.294	61.5913	0.235942	0.592357	9.59661	0.0347664	0.664717	DNA-PKCS_A2381P
DNA-PKCS	3	missense	A2381Q	DNA-PKCS	2381	2381	A	Q	Saturation-Mutagenesis	-1.278	18.5908	-0.911	Neutral	0.88756	-22	deleterious	-1.177	-4.895	61.5913	0.235942	0.592357	9.59661	0.0347664	0.664717	DNA-PKCS_A2381Q
DNA-PKCS	3	missense	A2381R	DNA-PKCS	2381	2381	A	R	Saturation-Mutagenesis	0.016	18.5908	-0.443	Neutral	0.88756	32	deleterious	-1.177	-2.312	61.5913	0.19465	0.530319	9.22826	0.0334233	0.573857	DNA-PKCS_A2381R
DNA-PKCS	3	missense	A2381S	DNA-PKCS	2381	2381	A	S	Saturation-Mutagenesis	-0.467	18.5908	-0.615	Neutral	0.88756	36	deleterious	-1.177	-3.638	61.5913	0.235942	0.592357	9.59661	0.0347664	0.664717	DNA-PKCS_A2381S
DNA-PKCS	3	missense	A2381T	DNA-PKCS	2381	2381	A	T	Saturation-Mutagenesis	-1.194	18.5908	-0.873	Neutral	0.88756	22	deleterious	-1.177	-3.736	61.5913	0.235942	0.592357	9.59661	0.0347664	0.664717	DNA-PKCS_A2381T
DNA-PKCS	3	missense	A2381V	DNA-PKCS	2381	2381	A	V	Saturation-Mutagenesis	-0.028	18.5908	-1.194	Neutral	0.88756	-43	deleterious	-1.177	-3.371	61.5913	0.235942	0.592357	9.59661	0.0347664	0.664717	DNA-PKCS_A2381V
DNA-PKCS	3	missense	A2381W	DNA-PKCS	2381	2381	A	W	Saturation-Mutagenesis	-0.375	18.5908	-2.909	Deleterious	0.908163	-36	deleterious	-1.674	-4.619	61.5913	0.235942	0.592357	9.59661	0.0347664	0.664717	DNA-PKCS_A2381W
DNA-PKCS	3	missense	A2381Y	DNA-PKCS	2381	2381	A	Y	Saturation-Mutagenesis	0.773	18.5908	-1.826	Neutral	0.88756	-27	deleterious	-1.674	-3.73	61.5913	0.235942	0.592357	9.59661	0.0347664	0.664717	DNA-PKCS_A2381Y
DNA-PKCS	3	missense	A2502C	DNA-PKCS	2502	2502	A	C	Saturation-Mutagenesis	-0.818	33.6431	-1.754	Neutral	0.739397	-5	deleterious	-1.403	-5.09	43.9708	0.247067	0.572315	9.94625	0.037816	0.707561	DNA-PKCS_A2502C
DNA-PKCS	3	missense	A2502D	DNA-PKCS	2502	2502	A	D	Saturation-Mutagenesis	-0.648	33.6431	-3.627	Deleterious	0.739397	-58	neutral	-1.403	-1.611	43.9708	0.247067	0.572315	9.94625	0.037816	0.707561	DNA-PKCS_A2502D
DNA-PKCS	3	missense	A2502E	DNA-PKCS	2502	2502	A	E	Saturation-Mutagenesis	-0.76	33.6431	-3.141	Deleterious	0.739397	-55	deleterious	-1.403	-2.901	43.9708	0.247067	0.572315	9.94625	0.037816	0.707561	DNA-PKCS_A2502E
DNA-PKCS	3	missense	A2502F	DNA-PKCS	2502	2502	A	F	Saturation-Mutagenesis	-1.147	33.6431	-3.635	Deleterious	0.739397	40	deleterious	-1.403	-4.674	43.9708	0.247067	0.572315	9.94625	0.037816	0.707561	DNA-PKCS_A2502F
DNA-PKCS	3	missense	A2502G	DNA-PKCS	2502	2502	A	G	Saturation-Mutagenesis	-0.673	33.6431	-2.629	Deleterious	0.739397	-29	deleterious	-1.403	-3.246	43.9708	0.247067	0.572315	9.94625	0.037816	0.707561	DNA-PKCS_A2502G
DNA-PKCS	3	missense	A2502H	DNA-PKCS	2502	2502	A	H	Saturation-Mutagenesis	-0.296	33.6431	-3.735	Deleterious	0.739397	-37	neutral	-1.403	-2.503	43.9708	0.247067	0.572315	9.94625	0.037816	0.707561	DNA-PKCS_A2502H
DNA-PKCS	3	missense	A2502I	DNA-PKCS	2502	2502	A	I	Saturation-Mutagenesis	-0.915	33.6431	-2.574	Deleterious	0.739397	-20	deleterious	-1.403	-3.662	43.9708	0.247067	0.572315	9.94625	0.037816	0.707561	DNA-PKCS_A2502I
DNA-PKCS	3	missense	A2502K	DNA-PKCS	2502	2502	A	K	Saturation-Mutagenesis	-1.287	33.6431	-2.941	Deleterious	0.739397	-56	deleterious	-1.403	-4.426	43.9708	0.247067	0.572315	9.94625	0.037816	0.707561	DNA-PKCS_A2502K
DNA-PKCS	3	missense	A2502L	DNA-PKCS	2502	2502	A	L	Saturation-Mutagenesis	-1.075	33.6431	-2.641	Deleterious	0.739397	-2	deleterious	-1.403	-4.013	43.9708	0.247067	0.572315	9.94625	0.037816	0.707561	DNA-PKCS_A2502L
DNA-PKCS	3	missense	A2502M	DNA-PKCS	2502	2502	A	M	Saturation-Mutagenesis	-1.147	33.6431	-2.741	Deleterious	0.739397	-18	deleterious	-1.403	-3.552	43.9708	0.247067	0.572315	9.94625	0.037816	0.707561	DNA-PKCS_A2502M
DNA-PKCS	3	missense	A2502N	DNA-PKCS	2502	2502	A	N	Saturation-Mutagenesis	-0.572	33.6431	-3.519	Deleterious	0.739397	-30	deleterious	-1.403	-3.336	43.9708	0.247067	0.572315	9.94625	0.037816	0.707561	DNA-PKCS_A2502N
DNA-PKCS	3	missense	A2502P	DNA-PKCS	2502	2502	A	P	Saturation-Mutagenesis	-0.83	33.6431	-3.141	Deleterious	0.739397	-24	deleterious	-1.403	-3.683	43.9708	0.247067	0.572315	9.94625	0.037816	0.707561	DNA-PKCS_A2502P
DNA-PKCS	3	missense	A2502Q	DNA-PKCS	2502	2502	A	Q	Saturation-Mutagenesis	-0.863	33.6431	-3.074	Deleterious	0.739397	-23	deleterious	-1.403	-3.554	43.9708	0.247067	0.572315	9.94625	0.037816	0.707561	DNA-PKCS_A2502Q
DNA-PKCS	3	missense	A2502R	DNA-PKCS	2502	2502	A	R	Saturation-Mutagenesis	-0.286	33.6431	-3.107	Deleterious	0.739397	-46	deleterious	-1.155	-4.034	43.9708	0.310864	0.677278	10.8784	0.0417093	0.878326	DNA-PKCS_A2502R
DNA-PKCS	3	missense	A2502S	DNA-PKCS	2502	2502	A	S	Saturation-Mutagenesis	-0.793	33.6431	-1.451	Neutral	0.739397	-58	deleterious	-1.403	-3.189	43.9708	0.247067	0.572315	9.94625	0.037816	0.707561	DNA-PKCS_A2502S
DNA-PKCS	3	missense	A2502T	DNA-PKCS	2502	2502	A	T	Saturation-Mutagenesis	-0.525	33.6431	-1.971	Neutral	0.739397	-8	deleterious	-1.403	-3.424	43.9708	0.247067	0.572315	9.94625	0.037816	0.707561	DNA-PKCS_A2502T
DNA-PKCS	3	missense	A2502V	DNA-PKCS	2502	2502	A	V	Saturation-Mutagenesis	-1.075	33.6431	-2.046	Neutral	0.739397	-16	deleterious	-1.403	-3.182	43.9708	0.247067	0.572315	9.94625	0.037816	0.707561	DNA-PKCS_A2502V
DNA-PKCS	3	missense	A2502W	DNA-PKCS	2502	2502	A	W	Saturation-Mutagenesis	-0.712	33.6431	-4.322	Deleterious	0.756014	3	deleterious	-1.403	-4.267	43.9708	0.247067	0.572315	9.94625	0.037816	0.707561	DNA-PKCS_A2502W
DNA-PKCS	3	missense	A2502Y	DNA-PKCS	2502	2502	A	Y	Saturation-Mutagenesis	-0.919	33.6431	-3.635	Deleterious	0.739397	26	deleterious	-1.403	-4.295	43.9708	0.247067	0.572315	9.94625	0.037816	0.707561	DNA-PKCS_A2502Y
DNA-PKCS	3	missense	A2541C	DNA-PKCS	2541	2541	A	C	Saturation-Mutagenesis	-0.436	44.3514	-2.068	Neutral	0.916531	-35	deleterious	-1.39	-3.38	39.7676	0.243636	0.571338	9.45315	0.0358883	0.730682	DNA-PKCS_A2541C
DNA-PKCS	3	missense	A2541D	DNA-PKCS	2541	2541	A	D	Saturation-Mutagenesis	0.396	44.3514	-1.946	Neutral	0.916531	-63	deleterious	-1.39	-3.775	39.7676	0.243636	0.571338	9.45315	0.0358883	0.730682	DNA-PKCS_A2541D
DNA-PKCS	3	missense	A2541E	DNA-PKCS	2541	2541	A	E	Saturation-Mutagenesis	-0.298	44.3514	-1.551	Neutral	0.916531	-48	deleterious	-1.39	-4.713	39.7676	0.243636	0.571338	9.45315	0.0358883	0.730682	DNA-PKCS_A2541E
DNA-PKCS	3	missense	A2541F	DNA-PKCS	2541	2541	A	F	Saturation-Mutagenesis	-0.765	44.3514	-1.813	Neutral	0.916531	61	deleterious	-1.39	-2.762	39.7676	0.243636	0.571338	9.45315	0.0358883	0.730682	DNA-PKCS_A2541F
DNA-PKCS	3	missense	A2541G	DNA-PKCS	2541	2541	A	G	Saturation-Mutagenesis	-0.37	44.3514	-1.412	Neutral	0.916531	-7	deleterious	-1.39	-3.931	39.7676	0.243636	0.571338	9.45315	0.0358883	0.730682	DNA-PKCS_A2541G
DNA-PKCS	3	missense	A2541H	DNA-PKCS	2541	2541	A	H	Saturation-Mutagenesis	-0.175	44.3514	-2.513	Deleterious	0.916531	-14	neutral	-1.532	-2.205	39.7676	0.243636	0.571338	9.45315	0.0358883	0.730682	DNA-PKCS_A2541H
DNA-PKCS	3	missense	A2541I	DNA-PKCS	2541	2541	A	I	Saturation-Mutagenesis	-0.704	44.3514	-0.296	Neutral	0.916531	6	deleterious	-1.39	-3.49	39.7676	0.243636	0.571338	9.45315	0.0358883	0.730682	DNA-PKCS_A2541I
DNA-PKCS	3	missense	A2541K	DNA-PKCS	2541	2541	A	K	Saturation-Mutagenesis	-0.465	44.3514	-1.751	Neutral	0.916531	-17	deleterious	-1.532	-3.788	39.7676	0.243636	0.571338	9.45315	0.0358883	0.730682	DNA-PKCS_A2541K
DNA-PKCS	3	missense	A2541L	DNA-PKCS	2541	2541	A	L	Saturation-Mutagenesis	-0.587	44.3514	-0.785	Neutral	0.916531	16	deleterious	-1.39	-3.878	39.7676	0.243636	0.571338	9.45315	0.0358883	0.730682	DNA-PKCS_A2541L
DNA-PKCS	3	missense	A2541M	DNA-PKCS	2541	2541	A	M	Saturation-Mutagenesis	-0.704	44.3514	-0.751	Neutral	0.916531	10	deleterious	-1.39	-2.28	39.7676	0.243636	0.571338	9.45315	0.0358883	0.730682	DNA-PKCS_A2541M
DNA-PKCS	3	missense	A2541N	DNA-PKCS	2541	2541	A	N	Saturation-Mutagenesis	-0.082	44.3514	-1.98	Neutral	0.916531	-25	deleterious	-1.39	-3.663	39.7676	0.243636	0.571338	9.45315	0.0358883	0.730682	DNA-PKCS_A2541N
DNA-PKCS	3	missense	A2541P	DNA-PKCS	2541	2541	A	P	Saturation-Mutagenesis	-0.146	44.3514	-2.296	Neutral	0.916531	-12	deleterious	-1.39	-3.8	39.7676	0.243636	0.571338	9.45315	0.0358883	0.730682	DNA-PKCS_A2541P
DNA-PKCS	3	missense	A2541Q	DNA-PKCS	2541	2541	A	Q	Saturation-Mutagenesis	-0.177	44.3514	-1.118	Neutral	0.916531	-9	deleterious	-1.39	-3.342	39.7676	0.243636	0.571338	9.45315	0.0358883	0.730682	DNA-PKCS_A2541Q
DNA-PKCS	3	missense	A2541R	DNA-PKCS	2541	2541	A	R	Saturation-Mutagenesis	-0.09	44.3514	-1.829	Neutral	0.916531	-37	deleterious	-1.532	-4.16	39.7676	0.243636	0.571338	9.45315	0.0358883	0.730682	DNA-PKCS_A2541R
DNA-PKCS	3	missense	A2541S	DNA-PKCS	2541	2541	A	S	Saturation-Mutagenesis	0.003	44.3514	-0.706	Neutral	0.916531	-24	deleterious	-1.39	-3.524	39.7676	0.243636	0.571338	9.45315	0.0358883	0.730682	DNA-PKCS_A2541S
DNA-PKCS	2	missense	A2541T	DNA-PKCS	2541	2541	A	T	Non-Pathogenic	-0.089	44.3514	-1.201	Neutral	0.916531	-14	deleterious	-1.39	-3.877	39.7676	0.243636	0.571338	9.45315	0.0358883	0.730682	DNA-PKCS_A2541T
DNA-PKCS	3	missense	A2541V	DNA-PKCS	2541	2541	A	V	Saturation-Mutagenesis	-0.532	44.3514	-0.135	Neutral	0.916531	10	deleterious	-1.39	-4.596	39.7676	0.243636	0.571338	9.45315	0.0358883	0.730682	DNA-PKCS_A2541V
DNA-PKCS	3	missense	A2541W	DNA-PKCS	2541	2541	A	W	Saturation-Mutagenesis	-0.337	44.3514	-3.052	Deleterious	0.922561	9	deleterious	-1.39	-2.518	39.7676	0.243636	0.571338	9.45315	0.0358883	0.730682	DNA-PKCS_A2541W
DNA-PKCS	3	missense	A2541Y	DNA-PKCS	2541	2541	A	Y	Saturation-Mutagenesis	-0.551	44.3514	-2.257	Neutral	0.916531	30	deleterious	-1.39	-2.156	39.7676	0.243636	0.571338	9.45315	0.0358883	0.730682	DNA-PKCS_A2541Y
DNA-PKCS	3	missense	A2558C	DNA-PKCS	2558	2558	A	C	Saturation-Mutagenesis	-0.771	41.0234	-2.708	Deleterious	0.845319	34	neutral	-2.345	-2.575	48.7853	0.659872	1.25889	16.418	0.0667248	2.12659	DNA-PKCS_A2558C
DNA-PKCS	3	missense	A2558D	DNA-PKCS	2558	2558	A	D	Saturation-Mutagenesis	0.319	41.0234	-3.63	Deleterious	0.845319	11	deleterious	-1.512	-3.977	48.7853	0.659872	1.25889	16.418	0.0667248	2.12659	DNA-PKCS_A2558D
DNA-PKCS	3	missense	A2558E	DNA-PKCS	2558	2558	A	E	Saturation-Mutagenesis	-0.457	41.0234	-3.102	Deleterious	0.845319	-22	deleterious	-1.512	-4.125	48.7853	0.659872	1.25889	16.418	0.0667248	2.12659	DNA-PKCS_A2558E
DNA-PKCS	3	missense	A2558F	DNA-PKCS	2558	2558	A	F	Saturation-Mutagenesis	-0.335	41.0234	-3.96	Deleterious	0.845319	42	neutral	-2.345	-3.148	48.7853	0.659872	1.25889	16.418	0.0667248	2.12659	DNA-PKCS_A2558F
DNA-PKCS	3	missense	A2558G	DNA-PKCS	2558	2558	A	G	Saturation-Mutagenesis	-0.283	41.0234	-2.377	Neutral	0.845319	10	neutral	-2.345	-3.417	48.7853	0.659872	1.25889	16.418	0.0667248	2.12659	DNA-PKCS_A2558G
DNA-PKCS	3	missense	A2558H	DNA-PKCS	2558	2558	A	H	Saturation-Mutagenesis	-0.218	41.0234	-3.83	Deleterious	0.845319	50	deleterious	-1.512	-3.059	48.7853	0.659872	1.25889	16.418	0.0667248	2.12659	DNA-PKCS_A2558H
DNA-PKCS	3	missense	A2558I	DNA-PKCS	2558	2558	A	I	Saturation-Mutagenesis	-0.284	41.0234	-3.128	Deleterious	0.845319	-79	deleterious	-2.345	-5.023	48.7853	0.659872	1.25889	16.418	0.0667248	2.12659	DNA-PKCS_A2558I
DNA-PKCS	3	missense	A2558K	DNA-PKCS	2558	2558	A	K	Saturation-Mutagenesis	-0.463	41.0234	-3.102	Deleterious	0.845319	6	deleterious	-1.512	-4.373	48.7853	0.659872	1.25889	16.418	0.0667248	2.12659	DNA-PKCS_A2558K
DNA-PKCS	3	missense	A2558L	DNA-PKCS	2558	2558	A	L	Saturation-Mutagenesis	-0.311	41.0234	-3.264	Deleterious	0.845319	-21	neutral	-2.345	-3.514	48.7853	0.659872	1.25889	16.418	0.0667248	2.12659	DNA-PKCS_A2558L
DNA-PKCS	3	missense	A2558M	DNA-PKCS	2558	2558	A	M	Saturation-Mutagenesis	-0.335	41.0234	-3.097	Deleterious	0.845319	-13	neutral	-2.345	-2.76	48.7853	0.659872	1.25889	16.418	0.0667248	2.12659	DNA-PKCS_A2558M
DNA-PKCS	3	missense	A2558N	DNA-PKCS	2558	2558	A	N	Saturation-Mutagenesis	-0.517	41.0234	-3.264	Deleterious	0.845319	-21	neutral	-2.345	-2.369	48.7853	0.659872	1.25889	16.418	0.0667248	2.12659	DNA-PKCS_A2558N
DNA-PKCS	3	missense	A2558P	DNA-PKCS	2558	2558	A	P	Saturation-Mutagenesis	-0.282	41.0234	-3.302	Deleterious	0.845319	-61	neutral	-2.345	-3.475	48.7853	0.659872	1.25889	16.418	0.0667248	2.12659	DNA-PKCS_A2558P
DNA-PKCS	3	missense	A2558Q	DNA-PKCS	2558	2558	A	Q	Saturation-Mutagenesis	-0.543	41.0234	-3.102	Deleterious	0.845319	48	neutral	-2.345	-2.677	48.7853	0.659872	1.25889	16.418	0.0667248	2.12659	DNA-PKCS_A2558Q
DNA-PKCS	3	missense	A2558R	DNA-PKCS	2558	2558	A	R	Saturation-Mutagenesis	0.054	41.0234	-3.271	Deleterious	0.845319	19	deleterious	-1.512	-2.302	48.7853	0.659872	1.25889	16.418	0.0667248	2.12659	DNA-PKCS_A2558R
DNA-PKCS	3	missense	A2558S	DNA-PKCS	2558	2558	A	S	Saturation-Mutagenesis	-0.16	41.0234	-1.249	Neutral	0.845319	18	neutral	-2.345	-2.506	48.7853	0.659872	1.25889	16.418	0.0667248	2.12659	DNA-PKCS_A2558S
DNA-PKCS	3	missense	A2558T	DNA-PKCS	2558	2558	A	T	Saturation-Mutagenesis	-0.279	41.0234	-2.073	Neutral	0.845319	-14	deleterious	-2.345	-4.58	48.7853	0.659872	1.25889	16.418	0.0667248	2.12659	DNA-PKCS_A2558T
DNA-PKCS	3	missense	A2558V	DNA-PKCS	2558	2558	A	V	Saturation-Mutagenesis	-0.311	41.0234	-2.5	Deleterious	0.845319	-76	neutral	-2.345	-3.72	48.7853	0.659872	1.25889	16.418	0.0667248	2.12659	DNA-PKCS_A2558V
DNA-PKCS	3	missense	A2558W	DNA-PKCS	2558	2558	A	W	Saturation-Mutagenesis	-0.657	41.0234	-4.823	Deleterious	0.872921	21	neutral	-2.345	-3.534	48.7853	0.659872	1.25889	16.418	0.0667248	2.12659	DNA-PKCS_A2558W
DNA-PKCS	3	missense	A2558Y	DNA-PKCS	2558	2558	A	Y	Saturation-Mutagenesis	0.139	41.0234	-3.96	Deleterious	0.845319	38	neutral	-2.345	-2.232	48.7853	0.659872	1.25889	16.418	0.0667248	2.12659	DNA-PKCS_A2558Y
DNA-PKCS	3	missense	A255C	DNA-PKCS	255	255	A	C	Saturation-Mutagenesis	-0.067	49.6285	-1.471	Neutral	0.537252	26	deleterious	-1.834	-3.646	105.541	0.335131	0.724006	11.1773	0.0407984	0.895179	DNA-PKCS_A255C
DNA-PKCS	3	missense	A255D	DNA-PKCS	255	255	A	D	Saturation-Mutagenesis	0.716	49.6285	-3.168	Deleterious	0.537252	-9	neutral	-1.834	-3.103	105.541	0.335131	0.724006	11.1773	0.0407984	0.895179	DNA-PKCS_A255D
DNA-PKCS	3	missense	A255E	DNA-PKCS	255	255	A	E	Saturation-Mutagenesis	0.22	49.6285	-2.664	Deleterious	0.537252	-30	deleterious	-1.834	-3.364	105.541	0.335131	0.724006	11.1773	0.0407984	0.895179	DNA-PKCS_A255E
DNA-PKCS	3	missense	A255F	DNA-PKCS	255	255	A	F	Saturation-Mutagenesis	0.835	49.6285	-3.157	Deleterious	0.537252	18	deleterious	-1.834	-4.157	105.541	0.335131	0.724006	11.1773	0.0407984	0.895179	DNA-PKCS_A255F
DNA-PKCS	3	missense	A255G	DNA-PKCS	255	255	A	G	Saturation-Mutagenesis	0.091	49.6285	-2.394	Neutral	0.537252	-3	neutral	-1.834	-2.058	105.541	0.335131	0.724006	11.1773	0.0407984	0.895179	DNA-PKCS_A255G
DNA-PKCS	3	missense	A255H	DNA-PKCS	255	255	A	H	Saturation-Mutagenesis	0.326	49.6285	-3.279	Deleterious	0.537252	56	neutral	-1.834	-3.184	105.541	0.335131	0.724006	11.1773	0.0407984	0.895179	DNA-PKCS_A255H
DNA-PKCS	3	missense	A255I	DNA-PKCS	255	255	A	I	Saturation-Mutagenesis	0.139	49.6285	-2.32	Neutral	0.537252	6	deleterious	-1.834	-3.47	105.541	0.335131	0.724006	11.1773	0.0407984	0.895179	DNA-PKCS_A255I
DNA-PKCS	3	missense	A255K	DNA-PKCS	255	255	A	K	Saturation-Mutagenesis	0.744	49.6285	-2.464	Neutral	0.537252	41	neutral	-1.834	-1.687	105.541	0.335131	0.724006	11.1773	0.0407984	0.895179	DNA-PKCS_A255K
DNA-PKCS	3	missense	A255L	DNA-PKCS	255	255	A	L	Saturation-Mutagenesis	0.69	49.6285	-2.253	Neutral	0.537252	11	deleterious	-1.834	-4.592	105.541	0.335131	0.724006	11.1773	0.0407984	0.895179	DNA-PKCS_A255L
DNA-PKCS	3	missense	A255M	DNA-PKCS	255	255	A	M	Saturation-Mutagenesis	0.819	49.6285	-2.309	Neutral	0.537252	-22	deleterious	-1.834	-4.234	105.541	0.335131	0.724006	11.1773	0.0407984	0.895179	DNA-PKCS_A255M
DNA-PKCS	3	missense	A255N	DNA-PKCS	255	255	A	N	Saturation-Mutagenesis	0.397	49.6285	-3.09	Deleterious	0.537252	-45	deleterious	-1.834	-4.96	105.541	0.335131	0.724006	11.1773	0.0407984	0.895179	DNA-PKCS_A255N
DNA-PKCS	3	missense	A255P	DNA-PKCS	255	255	A	P	Saturation-Mutagenesis	0.091	49.6285	-2.542	Deleterious	0.537252	19	deleterious	-1.834	-3.462	105.541	0.335131	0.724006	11.1773	0.0407984	0.895179	DNA-PKCS_A255P
DNA-PKCS	3	missense	A255Q	DNA-PKCS	255	255	A	Q	Saturation-Mutagenesis	0.765	49.6285	-2.464	Neutral	0.537252	-4	deleterious	-1.834	-3.184	105.541	0.335131	0.724006	11.1773	0.0407984	0.895179	DNA-PKCS_A255Q
DNA-PKCS	3	missense	A255R	DNA-PKCS	255	255	A	R	Saturation-Mutagenesis	0.951	49.6285	-2.609	Deleterious	0.537252	62	deleterious	-1.834	-4.357	105.541	0.335131	0.724006	11.1773	0.0407984	0.895179	DNA-PKCS_A255R
DNA-PKCS	3	missense	A255S	DNA-PKCS	255	255	A	S	Saturation-Mutagenesis	0.234	49.6285	-1.245	Neutral	0.537252	-12	deleterious	-1.834	-3.445	105.541	0.335131	0.724006	11.1773	0.0407984	0.895179	DNA-PKCS_A255S
DNA-PKCS	3	missense	A255T	DNA-PKCS	255	255	A	T	Saturation-Mutagenesis	0.199	49.6285	-1.783	Neutral	0.537252	-31	neutral	-1.834	-2.259	105.541	0.335131	0.724006	11.1773	0.0407984	0.895179	DNA-PKCS_A255T
DNA-PKCS	2	missense	A255V	DNA-PKCS	255	255	A	V	Non-Pathogenic	0.139	49.6285	-1.849	Neutral	0.537252	50	deleterious	-1.834	-3.894	105.541	0.335131	0.724006	11.1773	0.0407984	0.895179	DNA-PKCS_A255V
DNA-PKCS	3	missense	A255W	DNA-PKCS	255	255	A	W	Saturation-Mutagenesis	-0.318	49.6285	-3.606	Deleterious	0.537252	-21	deleterious	-1.377	-4.293	105.541	0.335131	0.724006	11.1773	0.0407984	0.895179	DNA-PKCS_A255W
DNA-PKCS	3	missense	A255Y	DNA-PKCS	255	255	A	Y	Saturation-Mutagenesis	0.895	49.6285	-3.124	Deleterious	0.537252	-14	deleterious	-1.377	-3.622	105.541	0.335131	0.724006	11.1773	0.0407984	0.895179	DNA-PKCS_A255Y
DNA-PKCS	3	missense	A266C	DNA-PKCS	266	266	A	C	Saturation-Mutagenesis	-0.622	47.5907	-1.994	Neutral	0.60564	25	deleterious	-1.402	-3.497	101.461	0.40964	0.995059	12.1329	0.0455573	1.25848	DNA-PKCS_A266C
DNA-PKCS	3	missense	A266D	DNA-PKCS	266	266	A	D	Saturation-Mutagenesis	-1.959	47.5907	-1.124	Neutral	0.60564	56	deleterious	-1.343	-2.872	101.461	0.40964	0.995059	12.1329	0.0455573	1.25848	DNA-PKCS_A266D
DNA-PKCS	3	missense	A266E	DNA-PKCS	266	266	A	E	Saturation-Mutagenesis	-1.411	47.5907	-0.609	Neutral	0.60564	30	deleterious	-1.343	-4.218	101.461	0.40964	0.995059	12.1329	0.0455573	1.25848	DNA-PKCS_A266E
DNA-PKCS	3	missense	A266F	DNA-PKCS	266	266	A	F	Saturation-Mutagenesis	-1.263	47.5907	-2.79	Deleterious	0.60564	18	deleterious	-1.402	-2.061	101.461	0.40964	0.995059	12.1329	0.0455573	1.25848	DNA-PKCS_A266F
DNA-PKCS	3	missense	A266G	DNA-PKCS	266	266	A	G	Saturation-Mutagenesis	-1.128	47.5907	-1.66	Neutral	0.60564	-8	deleterious	-1.402	-3.472	101.461	0.40964	0.995059	12.1329	0.0455573	1.25848	DNA-PKCS_A266G
DNA-PKCS	3	missense	A266H	DNA-PKCS	266	266	A	H	Saturation-Mutagenesis	-2.394	47.5907	-2.09	Neutral	0.60564	21	deleterious	-1.343	-2.32	101.461	0.40964	0.995059	12.1329	0.0455573	1.25848	DNA-PKCS_A266H
DNA-PKCS	3	missense	A266I	DNA-PKCS	266	266	A	I	Saturation-Mutagenesis	-1.312	47.5907	-2.275	Neutral	0.60564	-5	deleterious	-1.402	-2.315	101.461	0.40964	0.995059	12.1329	0.0455573	1.25848	DNA-PKCS_A266I
DNA-PKCS	3	missense	A266K	DNA-PKCS	266	266	A	K	Saturation-Mutagenesis	-1.756	47.5907	-1.342	Neutral	0.60564	10	deleterious	-1.343	-3.191	101.461	0.40964	0.995059	12.1329	0.0455573	1.25848	DNA-PKCS_A266K
DNA-PKCS	3	missense	A266L	DNA-PKCS	266	266	A	L	Saturation-Mutagenesis	-1.478	47.5907	-2.409	Neutral	0.60564	55	deleterious	-1.402	-3.802	101.461	0.40964	0.995059	12.1329	0.0455573	1.25848	DNA-PKCS_A266L
DNA-PKCS	3	missense	A266M	DNA-PKCS	266	266	A	M	Saturation-Mutagenesis	-1.21	47.5907	-2.109	Neutral	0.60564	39	deleterious	-1.402	-4.857	101.461	0.40964	0.995059	12.1329	0.0455573	1.25848	DNA-PKCS_A266M
DNA-PKCS	3	missense	A266N	DNA-PKCS	266	266	A	N	Saturation-Mutagenesis	-1.878	47.5907	-1.724	Neutral	0.60564	60	deleterious	-1.402	-3.862	101.461	0.40964	0.995059	12.1329	0.0455573	1.25848	DNA-PKCS_A266N
DNA-PKCS	3	missense	A266P	DNA-PKCS	266	266	A	P	Saturation-Mutagenesis	-1.128	47.5907	-1.909	Neutral	0.60564	32	deleterious	-1.402	-3.261	101.461	0.40964	0.995059	12.1329	0.0455573	1.25848	DNA-PKCS_A266P
DNA-PKCS	3	missense	A266Q	DNA-PKCS	266	266	A	Q	Saturation-Mutagenesis	-1.978	47.5907	-1.109	Neutral	0.60564	23	deleterious	-1.402	-3.489	101.461	0.40964	0.995059	12.1329	0.0455573	1.25848	DNA-PKCS_A266Q
DNA-PKCS	3	missense	A266R	DNA-PKCS	266	266	A	R	Saturation-Mutagenesis	-0.862	47.5907	-1.609	Neutral	0.60564	-16	deleterious	-1.343	-3.172	101.461	0.40964	0.995059	12.1329	0.0455573	1.25848	DNA-PKCS_A266R
DNA-PKCS	3	missense	A266S	DNA-PKCS	266	266	A	S	Saturation-Mutagenesis	-1.642	47.5907	-0.645	Neutral	0.60564	5	neutral	-1.343	-2.013	101.461	0.40964	0.995059	12.1329	0.0455573	1.25848	DNA-PKCS_A266S
DNA-PKCS	3	missense	A266T	DNA-PKCS	266	266	A	T	Saturation-Mutagenesis	-1.707	47.5907	-1.26	Neutral	0.60564	24	deleterious	-1.402	-3.74	101.461	0.40964	0.995059	12.1329	0.0455573	1.25848	DNA-PKCS_A266T
DNA-PKCS	3	missense	A266V	DNA-PKCS	266	266	A	V	Saturation-Mutagenesis	-1.312	47.5907	-1.76	Neutral	0.60564	5	deleterious	-1.402	-3.454	101.461	0.40964	0.995059	12.1329	0.0455573	1.25848	DNA-PKCS_A266V
DNA-PKCS	3	missense	A266W	DNA-PKCS	266	266	A	W	Saturation-Mutagenesis	-1.679	47.5907	-3.339	Deleterious	0.597527	-78	deleterious	-1.402	-3.11	101.461	0.40964	0.995059	12.1329	0.0455573	1.25848	DNA-PKCS_A266W
DNA-PKCS	3	missense	A266Y	DNA-PKCS	266	266	A	Y	Saturation-Mutagenesis	-1.558	47.5907	-2.557	Deleterious	0.60564	-58	deleterious	-1.402	-3.923	101.461	0.40964	0.995059	12.1329	0.0455573	1.25848	DNA-PKCS_A266Y
DNA-PKCS	1	missense	A2681S	DNA-PKCS	2681	2681	A	S	Pathogenic																DNA-PKCS_A2681S
DNA-PKCS	3	missense	A270C	DNA-PKCS	270	270	A	C	Saturation-Mutagenesis	-0.447	50.1112	-2.694	Deleterious	0.626794	-2	deleterious	-1.608	-3.69	106.569	0.264514	0.680822	10.8766	0.0383262	0.760972	DNA-PKCS_A270C
DNA-PKCS	3	missense	A270D	DNA-PKCS	270	270	A	D	Saturation-Mutagenesis	-1.192	50.1112	-3.757	Deleterious	0.626794	58	deleterious	-1.608	-4.657	106.569	0.264514	0.680822	10.8766	0.0383262	0.760972	DNA-PKCS_A270D
DNA-PKCS	3	missense	A270E	DNA-PKCS	270	270	A	E	Saturation-Mutagenesis	-0.666	50.1112	-3.175	Deleterious	0.626794	39	deleterious	-1.608	-3.507	106.569	0.264514	0.680822	10.8766	0.0383262	0.760972	DNA-PKCS_A270E
DNA-PKCS	3	missense	A270F	DNA-PKCS	270	270	A	F	Saturation-Mutagenesis	-0.598	50.1112	-3.79	Deleterious	0.626794	48	deleterious	-1.608	-3.128	106.569	0.264514	0.680822	10.8766	0.0383262	0.760972	DNA-PKCS_A270F
DNA-PKCS	3	missense	A270G	DNA-PKCS	270	270	A	G	Saturation-Mutagenesis	-0.818	50.1112	-2.56	Deleterious	0.626794	29	deleterious	-1.608	-3.911	106.569	0.264514	0.680822	10.8766	0.0383262	0.760972	DNA-PKCS_A270G
DNA-PKCS	3	missense	A270H	DNA-PKCS	270	270	A	H	Saturation-Mutagenesis	-1.553	50.1112	-3.724	Deleterious	0.626794	11	deleterious	-1.27	-3.599	106.569	0.264514	0.680822	10.8766	0.0383262	0.760972	DNA-PKCS_A270H
DNA-PKCS	3	missense	A270I	DNA-PKCS	270	270	A	I	Saturation-Mutagenesis	-0.958	50.1112	-3.275	Deleterious	0.626794	28	deleterious	-1.608	-3.744	106.569	0.264514	0.680822	10.8766	0.0383262	0.760972	DNA-PKCS_A270I
DNA-PKCS	3	missense	A270K	DNA-PKCS	270	270	A	K	Saturation-Mutagenesis	-1.019	50.1112	-3.175	Deleterious	0.626794	-1	deleterious	-1.608	-3.857	106.569	0.264514	0.680822	10.8766	0.0383262	0.760972	DNA-PKCS_A270K
DNA-PKCS	3	missense	A270L	DNA-PKCS	270	270	A	L	Saturation-Mutagenesis	-0.705	50.1112	-3.209	Deleterious	0.626794	42	neutral	-1.608	-2.368	106.569	0.264514	0.680822	10.8766	0.0383262	0.760972	DNA-PKCS_A270L
DNA-PKCS	3	missense	A270M	DNA-PKCS	270	270	A	M	Saturation-Mutagenesis	-0.553	50.1112	-3.209	Deleterious	0.626794	42	deleterious	-1.608	-3.417	106.569	0.264514	0.680822	10.8766	0.0383262	0.760972	DNA-PKCS_A270M
DNA-PKCS	3	missense	A270N	DNA-PKCS	270	270	A	N	Saturation-Mutagenesis	-1.119	50.1112	-3.457	Deleterious	0.626794	-10	neutral	-1.608	-2.335	106.569	0.264514	0.680822	10.8766	0.0383262	0.760972	DNA-PKCS_A270N
DNA-PKCS	3	missense	A270P	DNA-PKCS	270	270	A	P	Saturation-Mutagenesis	-0.818	50.1112	-3.242	Deleterious	0.626794	34	neutral	-1.608	-2.352	106.569	0.264514	0.680822	10.8766	0.0383262	0.760972	DNA-PKCS_A270P
DNA-PKCS	3	missense	A270Q	DNA-PKCS	270	270	A	Q	Saturation-Mutagenesis	-0.723	50.1112	-3.175	Deleterious	0.626794	13	deleterious	-1.608	-3.21	106.569	0.264514	0.680822	10.8766	0.0383262	0.760972	DNA-PKCS_A270Q
DNA-PKCS	3	missense	A270R	DNA-PKCS	270	270	A	R	Saturation-Mutagenesis	-0.536	50.1112	-3.209	Deleterious	0.626794	-18	deleterious	-1.27	-2.323	106.569	0.264514	0.680822	10.8766	0.0383262	0.760972	DNA-PKCS_A270R
DNA-PKCS	3	missense	A270S	DNA-PKCS	270	270	A	S	Saturation-Mutagenesis	-0.84	50.1112	-1.745	Neutral	0.626794	43	deleterious	-1.608	-2.423	106.569	0.264514	0.680822	10.8766	0.0383262	0.760972	DNA-PKCS_A270S
DNA-PKCS	3	missense	A270T	DNA-PKCS	270	270	A	T	Saturation-Mutagenesis	-1.108	50.1112	-2.527	Deleterious	0.626794	26	deleterious	-1.608	-3.378	106.569	0.264514	0.680822	10.8766	0.0383262	0.760972	DNA-PKCS_A270T
DNA-PKCS	3	missense	A270V	DNA-PKCS	270	270	A	V	Saturation-Mutagenesis	-0.958	50.1112	-2.694	Deleterious	0.626794	44	deleterious	-1.608	-3.114	106.569	0.264514	0.680822	10.8766	0.0383262	0.760972	DNA-PKCS_A270V
DNA-PKCS	3	missense	A270W	DNA-PKCS	270	270	A	W	Saturation-Mutagenesis	-2.655	50.1112	-4.639	Deleterious	0.626794	64	deleterious	-1.608	-4.037	106.569	0.264514	0.680822	10.8766	0.0383262	0.760972	DNA-PKCS_A270W
DNA-PKCS	3	missense	A270Y	DNA-PKCS	270	270	A	Y	Saturation-Mutagenesis	-0.729	50.1112	-3.89	Deleterious	0.626794	55	deleterious	-1.608	-4.428	106.569	0.264514	0.680822	10.8766	0.0383262	0.760972	DNA-PKCS_A270Y
DNA-PKCS	1	missense	A2719V	DNA-PKCS	2719	2719	A	V	Pathogenic																DNA-PKCS_A2719V
DNA-PKCS	3	missense	A276C	DNA-PKCS	276	276	A	C	Saturation-Mutagenesis	-0.238	58.6029	-1.872	Neutral	0.632212	30	neutral	-1.889	-2.11	115.413	0.191792	0.485017	9.52618	0.0343549	0.560187	DNA-PKCS_A276C
DNA-PKCS	3	missense	A276D	DNA-PKCS	276	276	A	D	Saturation-Mutagenesis	0.211	58.6029	-1.958	Neutral	0.632212	65	neutral	-1.889	-2.052	115.413	0.191792	0.485017	9.52618	0.0343549	0.560187	DNA-PKCS_A276D
DNA-PKCS	3	missense	A276E	DNA-PKCS	276	276	A	E	Saturation-Mutagenesis	0.172	58.6029	-1.398	Neutral	0.632212	35	neutral	-1.889	-2.487	115.413	0.191792	0.485017	9.52618	0.0343549	0.560187	DNA-PKCS_A276E
DNA-PKCS	3	missense	A276F	DNA-PKCS	276	276	A	F	Saturation-Mutagenesis	0.832	58.6029	-2.624	Deleterious	0.632212	24	deleterious	-1.167	-3.803	115.413	0.191792	0.485017	9.52618	0.0343549	0.560187	DNA-PKCS_A276F
DNA-PKCS	3	missense	A276G	DNA-PKCS	276	276	A	G	Saturation-Mutagenesis	-0.113	58.6029	-1.805	Neutral	0.632212	-4	neutral	-1.889	-3.432	115.413	0.191792	0.485017	9.52618	0.0343549	0.560187	DNA-PKCS_A276G
DNA-PKCS	3	missense	A276H	DNA-PKCS	276	276	A	H	Saturation-Mutagenesis	0.019	58.6029	-2.302	Neutral	0.632212	21	neutral	-1.889	-3.361	115.413	0.191792	0.485017	9.52618	0.0343549	0.560187	DNA-PKCS_A276H
DNA-PKCS	3	missense	A276I	DNA-PKCS	276	276	A	I	Saturation-Mutagenesis	-0.082	58.6029	-2.032	Neutral	0.632212	3	deleterious	-1.889	-4.557	115.413	0.191792	0.485017	9.52618	0.0343549	0.560187	DNA-PKCS_A276I
DNA-PKCS	3	missense	A276K	DNA-PKCS	276	276	A	K	Saturation-Mutagenesis	0.276	58.6029	-1.598	Neutral	0.632212	4	neutral	-1.889	-2.48	115.413	0.191792	0.485017	9.52618	0.0343549	0.560187	DNA-PKCS_A276K
DNA-PKCS	3	missense	A276L	DNA-PKCS	276	276	A	L	Saturation-Mutagenesis	0.221	58.6029	-2.087	Neutral	0.632212	60	deleterious	-1.889	-4.27	115.413	0.191792	0.485017	9.52618	0.0343549	0.560187	DNA-PKCS_A276L
DNA-PKCS	3	missense	A276M	DNA-PKCS	276	276	A	M	Saturation-Mutagenesis	0.794	58.6029	-1.876	Neutral	0.632212	49	deleterious	-1.889	-4.218	115.413	0.191792	0.485017	9.52618	0.0343549	0.560187	DNA-PKCS_A276M
DNA-PKCS	3	missense	A276N	DNA-PKCS	276	276	A	N	Saturation-Mutagenesis	0.166	58.6029	-1.747	Neutral	0.632212	66	deleterious	-1.889	-4.859	115.413	0.191792	0.485017	9.52618	0.0343549	0.560187	DNA-PKCS_A276N
DNA-PKCS	3	missense	A276P	DNA-PKCS	276	276	A	P	Saturation-Mutagenesis	-0.113	58.6029	-2.02	Neutral	0.632212	38	deleterious	-1.889	-3.868	115.413	0.191792	0.485017	9.52618	0.0343549	0.560187	DNA-PKCS_A276P
DNA-PKCS	3	missense	A276Q	DNA-PKCS	276	276	A	Q	Saturation-Mutagenesis	0.409	58.6029	-1.565	Neutral	0.632212	28	neutral	-1.889	-3.211	115.413	0.191792	0.485017	9.52618	0.0343549	0.560187	DNA-PKCS_A276Q
DNA-PKCS	3	missense	A276R	DNA-PKCS	276	276	A	R	Saturation-Mutagenesis	0.683	58.6029	-1.72	Neutral	0.632212	-24	neutral	-1.889	-3.315	115.413	0.191792	0.485017	9.52618	0.0343549	0.560187	DNA-PKCS_A276R
DNA-PKCS	3	missense	A276S	DNA-PKCS	276	276	A	S	Saturation-Mutagenesis	0.159	58.6029	-0.268	Neutral	0.632212	13	neutral	-1.889	-3.595	115.413	0.191792	0.485017	9.52618	0.0343549	0.560187	DNA-PKCS_A276S
DNA-PKCS	3	missense	A276T	DNA-PKCS	276	276	A	T	Saturation-Mutagenesis	0.043	58.6029	-0.562	Neutral	0.632212	28	neutral	-1.889	-2.438	115.413	0.191792	0.485017	9.52618	0.0343549	0.560187	DNA-PKCS_A276T
DNA-PKCS	3	missense	A276V	DNA-PKCS	276	276	A	V	Saturation-Mutagenesis	-0.082	58.6029	-1.594	Neutral	0.632212	9	neutral	-1.889	-3.408	115.413	0.191792	0.485017	9.52618	0.0343549	0.560187	DNA-PKCS_A276V
DNA-PKCS	3	missense	A276W	DNA-PKCS	276	276	A	W	Saturation-Mutagenesis	0.046	58.6029	-3.04	Deleterious	0.632212	-76	deleterious	-1.167	-3.378	115.413	0.191792	0.485017	9.52618	0.0343549	0.560187	DNA-PKCS_A276W
DNA-PKCS	3	missense	A276Y	DNA-PKCS	276	276	A	Y	Saturation-Mutagenesis	0.918	58.6029	-2.569	Deleterious	0.632212	-52	deleterious	-1.167	-4.418	115.413	0.191792	0.485017	9.52618	0.0343549	0.560187	DNA-PKCS_A276Y
DNA-PKCS	3	missense	A2796C	DNA-PKCS	2796	2796	A	C	Saturation-Mutagenesis	-0.478	39.3777	-2.912	Deleterious	0.918167	26	deleterious	-1.374	-3.557	41.0415	0.410755	1.01704	13.8442	0.0509583	1.42961	DNA-PKCS_A2796C
DNA-PKCS	3	missense	A2796D	DNA-PKCS	2796	2796	A	D	Saturation-Mutagenesis	0.709	39.3777	-4.335	Deleterious	0.918167	-10	deleterious	-1.382	-4.02	41.0415	0.410755	1.01704	13.8442	0.0509583	1.42961	DNA-PKCS_A2796D
DNA-PKCS	3	missense	A2796E	DNA-PKCS	2796	2796	A	E	Saturation-Mutagenesis	0.144	39.3777	-3.674	Deleterious	0.918167	-37	deleterious	-1.382	-4.152	41.0415	0.410755	1.01704	13.8442	0.0509583	1.42961	DNA-PKCS_A2796E
DNA-PKCS	3	missense	A2796F	DNA-PKCS	2796	2796	A	F	Saturation-Mutagenesis	0.128	39.3777	-4.168	Deleterious	0.918167	-25	deleterious	-1.374	-3.922	41.0415	0.410755	1.01704	13.8442	0.0509583	1.42961	DNA-PKCS_A2796F
DNA-PKCS	3	missense	A2796G	DNA-PKCS	2796	2796	A	G	Saturation-Mutagenesis	-0.434	39.3777	-2.579	Deleterious	0.918167	13	deleterious	-1.374	-2.525	41.0415	0.410755	1.01704	13.8442	0.0509583	1.42961	DNA-PKCS_A2796G
DNA-PKCS	3	missense	A2796H	DNA-PKCS	2796	2796	A	H	Saturation-Mutagenesis	0.447	39.3777	-4.368	Deleterious	0.918167	-11	deleterious	-1.382	-3.02	41.0415	0.410755	1.01704	13.8442	0.0509583	1.42961	DNA-PKCS_A2796H
DNA-PKCS	3	missense	A2796I	DNA-PKCS	2796	2796	A	I	Saturation-Mutagenesis	-0.292	39.3777	-3.307	Deleterious	0.918167	-35	deleterious	-1.374	-3.935	41.0415	0.410755	1.01704	13.8442	0.0509583	1.42961	DNA-PKCS_A2796I
DNA-PKCS	3	missense	A2796K	DNA-PKCS	2796	2796	A	K	Saturation-Mutagenesis	0.098	39.3777	-3.607	Deleterious	0.918167	-34	deleterious	-1.382	-4.414	41.0415	0.410755	1.01704	13.8442	0.0509583	1.42961	DNA-PKCS_A2796K
DNA-PKCS	3	missense	A2796L	DNA-PKCS	2796	2796	A	L	Saturation-Mutagenesis	-0.001	39.3777	-3.24	Deleterious	0.918167	-43	deleterious	-1.374	-4.725	41.0415	0.410755	1.01704	13.8442	0.0509583	1.42961	DNA-PKCS_A2796L
DNA-PKCS	3	missense	A2796M	DNA-PKCS	2796	2796	A	M	Saturation-Mutagenesis	0.128	39.3777	-3.307	Deleterious	0.918167	-14	deleterious	-1.374	-3.546	41.0415	0.410755	1.01704	13.8442	0.0509583	1.42961	DNA-PKCS_A2796M
DNA-PKCS	3	missense	A2796N	DNA-PKCS	2796	2796	A	N	Saturation-Mutagenesis	-0.579	39.3777	-4.135	Deleterious	0.918167	19	deleterious	-1.374	-2.285	41.0415	0.410755	1.01704	13.8442	0.0509583	1.42961	DNA-PKCS_A2796N
DNA-PKCS	3	missense	A2796P	DNA-PKCS	2796	2796	A	P	Saturation-Mutagenesis	-0.45	39.3777	-3.707	Deleterious	0.918167	69	deleterious	-1.374	-2.478	41.0415	0.410755	1.01704	13.8442	0.0509583	1.42961	DNA-PKCS_A2796P
DNA-PKCS	3	missense	A2796Q	DNA-PKCS	2796	2796	A	Q	Saturation-Mutagenesis	-0.774	39.3777	-3.607	Deleterious	0.918167	15	deleterious	-1.374	-3.779	41.0415	0.410755	1.01704	13.8442	0.0509583	1.42961	DNA-PKCS_A2796Q
DNA-PKCS	3	missense	A2796R	DNA-PKCS	2796	2796	A	R	Saturation-Mutagenesis	0.259	39.3777	-3.64	Deleterious	0.918167	-27	neutral	-1.382	-2.315	41.0415	0.458408	1.02233	14.2027	0.0546422	1.51753	DNA-PKCS_A2796R
DNA-PKCS	3	missense	A2796S	DNA-PKCS	2796	2796	A	S	Saturation-Mutagenesis	-0.76	39.3777	-1.984	Neutral	0.918167	-1	deleterious	-1.374	-3.704	41.0415	0.410755	1.01704	13.8442	0.0509583	1.42961	DNA-PKCS_A2796S
DNA-PKCS	3	missense	A2796T	DNA-PKCS	2796	2796	A	T	Saturation-Mutagenesis	-0.726	39.3777	-2.779	Deleterious	0.918167	-10	deleterious	-1.374	-4.752	41.0415	0.410755	1.01704	13.8442	0.0509583	1.42961	DNA-PKCS_A2796T
DNA-PKCS	2	missense	A2796V	DNA-PKCS	2796	2796	A	V	Non-Pathogenic	-0.001	39.3777	-2.679	Deleterious	0.918167	-33	deleterious	-1.374	-3.778	41.0415	0.410755	1.01704	13.8442	0.0509583	1.42961	DNA-PKCS_A2796V
DNA-PKCS	3	missense	A2796W	DNA-PKCS	2796	2796	A	W	Saturation-Mutagenesis	-0.106	39.3777	-5.03	Deleterious	0.914038	-50	deleterious	-1.374	-2.981	41.0415	0.410755	1.01704	13.8442	0.0509583	1.42961	DNA-PKCS_A2796W
DNA-PKCS	3	missense	A2796Y	DNA-PKCS	2796	2796	A	Y	Saturation-Mutagenesis	0.434	39.3777	-4.268	Deleterious	0.918167	-62	deleterious	-1.374	-3.011	41.0415	0.410755	1.01704	13.8442	0.0509583	1.42961	DNA-PKCS_A2796Y
DNA-PKCS	3	missense	A2798C	DNA-PKCS	2798	2798	A	C	Saturation-Mutagenesis	-1.479	39.1889	-1.279	Neutral	0.929183	39	deleterious	-1.099	-3.393	42.0441	0.448417	0.933156	14.2088	0.0517547	1.62059	DNA-PKCS_A2798C
DNA-PKCS	3	missense	A2798D	DNA-PKCS	2798	2798	A	D	Saturation-Mutagenesis	-0.977	39.1889	-4.635	Deleterious	0.929183	26	deleterious	-1.099	-4.21	42.0441	0.448417	0.933156	14.2088	0.0517547	1.62059	DNA-PKCS_A2798D
DNA-PKCS	3	missense	A2798E	DNA-PKCS	2798	2798	A	E	Saturation-Mutagenesis	-2.061	39.1889	-4.14	Deleterious	0.929183	-8	deleterious	-1.099	-2.086	42.0441	0.448417	0.933156	14.2088	0.0517547	1.62059	DNA-PKCS_A2798E
DNA-PKCS	3	missense	A2798F	DNA-PKCS	2798	2798	A	F	Saturation-Mutagenesis	-1.28	39.1889	-4.502	Deleterious	0.929183	-48	deleterious	-1.099	-3.956	42.0441	0.448417	0.933156	14.2088	0.0517547	1.62059	DNA-PKCS_A2798F
DNA-PKCS	3	missense	A2798G	DNA-PKCS	2798	2798	A	G	Saturation-Mutagenesis	-1.547	39.1889	-3.279	Deleterious	0.929183	25	deleterious	-1.099	-3.395	42.0441	0.448417	0.933156	14.2088	0.0517547	1.62059	DNA-PKCS_A2798G
DNA-PKCS	3	missense	A2798H	DNA-PKCS	2798	2798	A	H	Saturation-Mutagenesis	0.038	39.1889	-4.668	Deleterious	0.929183	-20	deleterious	-1.73	-4.222	42.0441	0.448417	0.933156	14.2088	0.0517547	1.62059	DNA-PKCS_A2798H
DNA-PKCS	3	missense	A2798I	DNA-PKCS	2798	2798	A	I	Saturation-Mutagenesis	-1.135	39.1889	-3.64	Deleterious	0.929183	-58	deleterious	-1.099	-3.784	42.0441	0.448417	0.933156	14.2088	0.0517547	1.62059	DNA-PKCS_A2798I
DNA-PKCS	3	missense	A2798K	DNA-PKCS	2798	2798	A	K	Saturation-Mutagenesis	-2.331	39.1889	-3.974	Deleterious	0.929183	9	deleterious	-1.73	-4.078	42.0441	0.448417	0.933156	14.2088	0.0517547	1.62059	DNA-PKCS_A2798K
DNA-PKCS	3	missense	A2798L	DNA-PKCS	2798	2798	A	L	Saturation-Mutagenesis	-1.135	39.1889	-3.64	Deleterious	0.929183	-50	deleterious	-1.099	-3.023	42.0441	0.448417	0.933156	14.2088	0.0517547	1.62059	DNA-PKCS_A2798L
DNA-PKCS	3	missense	A2798M	DNA-PKCS	2798	2798	A	M	Saturation-Mutagenesis	-1.28	39.1889	-3.64	Deleterious	0.929183	-30	deleterious	-1.099	-3.658	42.0441	0.448417	0.933156	14.2088	0.0517547	1.62059	DNA-PKCS_A2798M
DNA-PKCS	3	missense	A2798N	DNA-PKCS	2798	2798	A	N	Saturation-Mutagenesis	-1.058	39.1889	-4.668	Deleterious	0.929183	22	deleterious	-1.099	-3.29	42.0441	0.448417	0.933156	14.2088	0.0517547	1.62059	DNA-PKCS_A2798N
DNA-PKCS	3	missense	A2798P	DNA-PKCS	2798	2798	A	P	Saturation-Mutagenesis	-1.212	39.1889	-3.974	Deleterious	0.929183	60	deleterious	-1.099	-5.033	42.0441	0.448417	0.933156	14.2088	0.0517547	1.62059	DNA-PKCS_A2798P
DNA-PKCS	3	missense	A2798Q	DNA-PKCS	2798	2798	A	Q	Saturation-Mutagenesis	-1.237	39.1889	-3.974	Deleterious	0.929183	13	deleterious	-1.099	-3.367	42.0441	0.448417	0.933156	14.2088	0.0517547	1.62059	DNA-PKCS_A2798Q
DNA-PKCS	3	missense	A2798R	DNA-PKCS	2798	2798	A	R	Saturation-Mutagenesis	-0.044	39.1889	-3.974	Deleterious	0.929183	-10	deleterious	-1.73	-4.755	42.0441	0.493089	1.1393	15.7895	0.0540374	1.80638	DNA-PKCS_A2798R
DNA-PKCS	3	missense	A2798S	DNA-PKCS	2798	2798	A	S	Saturation-Mutagenesis	-1.709	39.1889	-2.251	Neutral	0.929183	0	deleterious	-1.099	-3.598	42.0441	0.448417	0.933156	14.2088	0.0517547	1.62059	DNA-PKCS_A2798S
DNA-PKCS	3	missense	A2798T	DNA-PKCS	2798	2798	A	T	Saturation-Mutagenesis	-1.886	39.1889	-2.946	Deleterious	0.929183	17	deleterious	-1.099	-3.119	42.0441	0.448417	0.933156	14.2088	0.0517547	1.62059	DNA-PKCS_A2798T
DNA-PKCS	3	missense	A2798V	DNA-PKCS	2798	2798	A	V	Saturation-Mutagenesis	-0.748	39.1889	-2.946	Deleterious	0.929183	-48	deleterious	-1.099	-3.304	42.0441	0.448417	0.933156	14.2088	0.0517547	1.62059	DNA-PKCS_A2798V
DNA-PKCS	3	missense	A2798W	DNA-PKCS	2798	2798	A	W	Saturation-Mutagenesis	-0.837	39.1889	-5.196	Deleterious	0.924588	-79	deleterious	-1.099	-4.425	42.0441	0.448417	0.933156	14.2088	0.0517547	1.62059	DNA-PKCS_A2798W
DNA-PKCS	3	missense	A2798Y	DNA-PKCS	2798	2798	A	Y	Saturation-Mutagenesis	-1.076	39.1889	-4.502	Deleterious	0.929183	-82	deleterious	-1.099	-3.304	42.0441	0.448417	0.933156	14.2088	0.0517547	1.62059	DNA-PKCS_A2798Y
DNA-PKCS	3	missense	A279C	DNA-PKCS	279	279	A	C	Saturation-Mutagenesis	-0.561	61.9593	-2.505	Deleterious	0.668047	13	deleterious	-1.177	-2.716	117.962	0.235942	0.592357	9.59661	0.0347664	0.664717	DNA-PKCS_A279C
DNA-PKCS	3	missense	A279D	DNA-PKCS	279	279	A	D	Saturation-Mutagenesis	-1.515	61.9593	-3.402	Deleterious	0.668047	82	deleterious	-1.177	-3.913	117.962	0.235942	0.592357	9.59661	0.0347664	0.664717	DNA-PKCS_A279D
DNA-PKCS	3	missense	A279E	DNA-PKCS	279	279	A	E	Saturation-Mutagenesis	-0.982	61.9593	-2.864	Deleterious	0.668047	-5	deleterious	-1.177	-4.617	117.962	0.235942	0.592357	9.59661	0.0347664	0.664717	DNA-PKCS_A279E
DNA-PKCS	3	missense	A279F	DNA-PKCS	279	279	A	F	Saturation-Mutagenesis	-1.082	61.9593	-3.757	Deleterious	0.668047	9	deleterious	-1.331	-3.589	117.962	0.235942	0.592357	9.59661	0.0347664	0.664717	DNA-PKCS_A279F
DNA-PKCS	3	missense	A279G	DNA-PKCS	279	279	A	G	Saturation-Mutagenesis	-1.062	61.9593	-2.327	Neutral	0.668047	33	deleterious	-1.177	-4.039	117.962	0.235942	0.592357	9.59661	0.0347664	0.664717	DNA-PKCS_A279G
DNA-PKCS	3	missense	A279H	DNA-PKCS	279	279	A	H	Saturation-Mutagenesis	-1.879	61.9593	-3.579	Deleterious	0.668047	56	deleterious	-1.177	-3.097	117.962	0.235942	0.592357	9.59661	0.0347664	0.664717	DNA-PKCS_A279H
DNA-PKCS	3	missense	A279I	DNA-PKCS	279	279	A	I	Saturation-Mutagenesis	-1.24	61.9593	-3.22	Deleterious	0.668047	52	deleterious	-1.331	-3.511	117.962	0.235942	0.592357	9.59661	0.0347664	0.664717	DNA-PKCS_A279I
DNA-PKCS	3	missense	A279K	DNA-PKCS	279	279	A	K	Saturation-Mutagenesis	-1.315	61.9593	-2.864	Deleterious	0.668047	55	deleterious	-1.177	-2.343	117.962	0.235942	0.592357	9.59661	0.0347664	0.664717	DNA-PKCS_A279K
DNA-PKCS	3	missense	A279L	DNA-PKCS	279	279	A	L	Saturation-Mutagenesis	-1.243	61.9593	-3.22	Deleterious	0.668047	49	deleterious	-1.331	-4.483	117.962	0.235942	0.592357	9.59661	0.0347664	0.664717	DNA-PKCS_A279L
DNA-PKCS	3	missense	A279M	DNA-PKCS	279	279	A	M	Saturation-Mutagenesis	-1.037	61.9593	-2.942	Deleterious	0.668047	47	deleterious	-1.331	-2.269	117.962	0.235942	0.592357	9.59661	0.0347664	0.664717	DNA-PKCS_A279M
DNA-PKCS	3	missense	A279N	DNA-PKCS	279	279	A	N	Saturation-Mutagenesis	-1.49	61.9593	-3.224	Deleterious	0.668047	37	deleterious	-1.177	-2.832	117.962	0.235942	0.592357	9.59661	0.0347664	0.664717	DNA-PKCS_A279N
DNA-PKCS	3	missense	A279P	DNA-PKCS	279	279	A	P	Saturation-Mutagenesis	-1.062	61.9593	-3.042	Deleterious	0.668047	25	deleterious	-1.177	-3.822	117.962	0.235942	0.592357	9.59661	0.0347664	0.664717	DNA-PKCS_A279P
DNA-PKCS	3	missense	A279Q	DNA-PKCS	279	279	A	Q	Saturation-Mutagenesis	-1.41	61.9593	-2.864	Deleterious	0.668047	33	deleterious	-1.177	-2.729	117.962	0.235942	0.592357	9.59661	0.0347664	0.664717	DNA-PKCS_A279Q
DNA-PKCS	3	missense	A279R	DNA-PKCS	279	279	A	R	Saturation-Mutagenesis	-0.516	61.9593	-3.042	Deleterious	0.668047	46	deleterious	-1.177	-3.329	117.962	0.235942	0.592357	9.59661	0.0347664	0.664717	DNA-PKCS_A279R
DNA-PKCS	3	missense	A279S	DNA-PKCS	279	279	A	S	Saturation-Mutagenesis	-1.209	61.9593	-1.079	Neutral	0.668047	7	deleterious	-1.177	-3.301	117.962	0.235942	0.592357	9.59661	0.0347664	0.664717	DNA-PKCS_A279S
DNA-PKCS	1	missense	A279T	DNA-PKCS	279	279	A	T	Pathogenic	-1.384	61.9593	-2.149	Neutral	0.668047	43	deleterious	-1.177	-3.781	117.962	0.235942	0.592357	9.59661	0.0347664	0.664717	DNA-PKCS_A279T
DNA-PKCS	3	missense	A279V	DNA-PKCS	279	279	A	V	Saturation-Mutagenesis	-1.24	61.9593	-2.683	Deleterious	0.668047	35	deleterious	-1.177	-3.881	117.962	0.235942	0.592357	9.59661	0.0347664	0.664717	DNA-PKCS_A279V
DNA-PKCS	3	missense	A279W	DNA-PKCS	279	279	A	W	Saturation-Mutagenesis	-1.042	61.9593	-4.472	Deleterious	0.668047	27	deleterious	-1.331	-3.261	117.962	0.235942	0.592357	9.59661	0.0347664	0.664717	DNA-PKCS_A279W
DNA-PKCS	3	missense	A279Y	DNA-PKCS	279	279	A	Y	Saturation-Mutagenesis	-1.289	61.9593	-3.757	Deleterious	0.668047	14	deleterious	-1.331	-3.414	117.962	0.235942	0.592357	9.59661	0.0347664	0.664717	DNA-PKCS_A279Y
DNA-PKCS	3	missense	A27C	DNA-PKCS	27	27	A	C	Saturation-Mutagenesis	0.686	30.9068	-1.362	Neutral	0.76978	-27	neutral	-1.746	-2.252	107.329	0.888739	1.91227	14.6021	0.0538161	3.17411	DNA-PKCS_A27C
DNA-PKCS	3	missense	A27D	DNA-PKCS	27	27	A	D	Saturation-Mutagenesis	0.607	30.9068	-1.303	Neutral	0.76978	0	neutral	-2.153	-3.35	107.329	0.888739	1.91227	14.6021	0.0538161	3.17411	DNA-PKCS_A27D
DNA-PKCS	3	missense	A27E	DNA-PKCS	27	27	A	E	Saturation-Mutagenesis	0.569	30.9068	-1.202	Neutral	0.76978	-14	deleterious	-1.12	-3.365	107.329	0.888739	1.91227	14.6021	0.0538161	3.17411	DNA-PKCS_A27E
DNA-PKCS	3	missense	A27F	DNA-PKCS	27	27	A	F	Saturation-Mutagenesis	0.78	30.9068	-1.692	Neutral	0.76978	19	neutral	-1.951	-3.46	107.329	0.888739	1.91227	14.6021	0.0538161	3.17411	DNA-PKCS_A27F
DNA-PKCS	3	missense	A27G	DNA-PKCS	27	27	A	G	Saturation-Mutagenesis	-0.172	30.9068	-1.106	Neutral	0.76978	-52	deleterious	-1.105	-4.733	107.329	0.888739	1.91227	14.6021	0.0538161	3.17411	DNA-PKCS_A27G
DNA-PKCS	3	missense	A27H	DNA-PKCS	27	27	A	H	Saturation-Mutagenesis	0.891	30.9068	-1.614	Neutral	0.76978	-34	deleterious	-1.788	-3.224	107.329	0.888739	1.91227	14.6021	0.0538161	3.17411	DNA-PKCS_A27H
DNA-PKCS	3	missense	A27I	DNA-PKCS	27	27	A	I	Saturation-Mutagenesis	0.031	30.9068	-1.018	Neutral	0.76978	-31	deleterious	-1.464	-4.574	107.329	0.888739	1.91227	14.6021	0.0538161	3.17411	DNA-PKCS_A27I
DNA-PKCS	3	missense	A27K	DNA-PKCS	27	27	A	K	Saturation-Mutagenesis	0.272	30.9068	-1.311	Neutral	0.76978	-30	deleterious	-1.611	-3.605	107.329	0.888739	1.91227	14.6021	0.0538161	3.17411	DNA-PKCS_A27K
DNA-PKCS	3	missense	A27L	DNA-PKCS	27	27	A	L	Saturation-Mutagenesis	0.031	30.9068	-1.218	Neutral	0.76978	-12	deleterious	-1.12	-4.755	107.329	0.888739	1.91227	14.6021	0.0538161	3.17411	DNA-PKCS_A27L
DNA-PKCS	3	missense	A27M	DNA-PKCS	27	27	A	M	Saturation-Mutagenesis	0.519	30.9068	-1.257	Neutral	0.76978	-24	deleterious	-1.243	-3.332	107.329	0.888739	1.91227	14.6021	0.0538161	3.17411	DNA-PKCS_A27M
DNA-PKCS	3	missense	A27N	DNA-PKCS	27	27	A	N	Saturation-Mutagenesis	0.182	30.9068	-1.153	Neutral	0.76978	-42	deleterious	-1.083	-3.856	107.329	0.888739	1.91227	14.6021	0.0538161	3.17411	DNA-PKCS_A27N
DNA-PKCS	3	missense	A27P	DNA-PKCS	27	27	A	P	Saturation-Mutagenesis	-0.015	30.9068	-1.29	Neutral	0.76978	-20	deleterious	-1.105	-3.993	107.329	0.888739	1.91227	14.6021	0.0538161	3.17411	DNA-PKCS_A27P
DNA-PKCS	3	missense	A27Q	DNA-PKCS	27	27	A	Q	Saturation-Mutagenesis	0.365	30.9068	-1.346	Neutral	0.76978	-38	deleterious	-1.746	-4.467	107.329	0.888739	1.91227	14.6021	0.0538161	3.17411	DNA-PKCS_A27Q
DNA-PKCS	3	missense	A27R	DNA-PKCS	27	27	A	R	Saturation-Mutagenesis	-0.079	30.9068	-1.417	Neutral	0.76978	-28	deleterious	-1.645	-3.329	107.329	0.888739	1.91227	14.6021	0.0538161	3.17411	DNA-PKCS_A27R
DNA-PKCS	1	missense	A27S	DNA-PKCS	27	27	A	S	Pathogenic	0.242	30.9068	-0.471	Neutral	0.76978	-69	deleterious	-1.671	-3.409	107.329	0.888739	1.91227	14.6021	0.0538161	3.17411	DNA-PKCS_A27S
DNA-PKCS	3	missense	A27T	DNA-PKCS	27	27	A	T	Saturation-Mutagenesis	0.25	30.9068	-1.095	Neutral	0.76978	-64	deleterious	-1.612	-3.673	107.329	0.888739	1.91227	14.6021	0.0538161	3.17411	DNA-PKCS_A27T
DNA-PKCS	3	missense	A27V	DNA-PKCS	27	27	A	V	Saturation-Mutagenesis	-0.015	30.9068	-0.711	Neutral	0.76978	-33	deleterious	-1.364	-3.451	107.329	0.888739	1.91227	14.6021	0.0538161	3.17411	DNA-PKCS_A27V
DNA-PKCS	3	missense	A27W	DNA-PKCS	27	27	A	W	Saturation-Mutagenesis	0.875	30.9068	-2.227	Neutral	0.76978	63	deleterious	-1.408	-3.729	107.329	0.888739	1.91227	14.6021	0.0538161	3.17411	DNA-PKCS_A27W
DNA-PKCS	3	missense	A27Y	DNA-PKCS	27	27	A	Y	Saturation-Mutagenesis	0.809	30.9068	-1.575	Neutral	0.76978	4	deleterious	-1.284	-2.986	107.329	0.888739	1.91227	14.6021	0.0538161	3.17411	DNA-PKCS_A27Y
DNA-PKCS	3	missense	A2805C	DNA-PKCS	2805	2805	A	C	Saturation-Mutagenesis	-0.484	46.7917	-3.212	Deleterious	0.942419	9	deleterious	-1.312	-3.152	30.4283	0.306362	0.666399	12.1006	0.0428077	1.02354	DNA-PKCS_A2805C
DNA-PKCS	3	missense	A2805D	DNA-PKCS	2805	2805	A	D	Saturation-Mutagenesis	0.157	46.7917	-4.335	Deleterious	0.942419	-31	deleterious	-1.312	-3.495	30.4283	0.306362	0.666399	12.1006	0.0428077	1.02354	DNA-PKCS_A2805D
DNA-PKCS	3	missense	A2805E	DNA-PKCS	2805	2805	A	E	Saturation-Mutagenesis	-0.095	46.7917	-3.74	Deleterious	0.942419	-39	deleterious	-1.312	-4.045	30.4283	0.306362	0.666399	12.1006	0.0428077	1.02354	DNA-PKCS_A2805E
DNA-PKCS	3	missense	A2805F	DNA-PKCS	2805	2805	A	F	Saturation-Mutagenesis	-0.879	46.7917	-4.668	Deleterious	0.942419	-22	deleterious	-1.047	-3.896	30.4283	0.306362	0.666399	12.1006	0.0428077	1.02354	DNA-PKCS_A2805F
DNA-PKCS	3	missense	A2805G	DNA-PKCS	2805	2805	A	G	Saturation-Mutagenesis	-0.405	46.7917	-2.246	Neutral	0.942419	-3	deleterious	-1.312	-2.981	30.4283	0.306362	0.666399	12.1006	0.0428077	1.02354	DNA-PKCS_A2805G
DNA-PKCS	3	missense	A2805H	DNA-PKCS	2805	2805	A	H	Saturation-Mutagenesis	-0.243	46.7917	-4.502	Deleterious	0.942419	-30	deleterious	-1.312	-3.812	30.4283	0.306362	0.666399	12.1006	0.0428077	1.02354	DNA-PKCS_A2805H
DNA-PKCS	3	missense	A2805I	DNA-PKCS	2805	2805	A	I	Saturation-Mutagenesis	-0.815	46.7917	-4.074	Deleterious	0.942419	-25	neutral	-1.312	-2.509	30.4283	0.306362	0.666399	12.1006	0.0428077	1.02354	DNA-PKCS_A2805I
DNA-PKCS	3	missense	A2805K	DNA-PKCS	2805	2805	A	K	Saturation-Mutagenesis	-0.099	46.7917	-3.74	Deleterious	0.942419	-30	deleterious	-1.312	-3.576	30.4283	0.306362	0.666399	12.1006	0.0428077	1.02354	DNA-PKCS_A2805K
DNA-PKCS	3	missense	A2805L	DNA-PKCS	2805	2805	A	L	Saturation-Mutagenesis	-0.685	46.7917	-4.074	Deleterious	0.942419	-33	deleterious	-1.312	-2.285	30.4283	0.306362	0.666399	12.1006	0.0428077	1.02354	DNA-PKCS_A2805L
DNA-PKCS	3	missense	A2805M	DNA-PKCS	2805	2805	A	M	Saturation-Mutagenesis	-0.815	46.7917	-3.907	Deleterious	0.942419	-15	deleterious	-1.047	-3.868	30.4283	0.306362	0.666399	12.1006	0.0428077	1.02354	DNA-PKCS_A2805M
DNA-PKCS	3	missense	A2805N	DNA-PKCS	2805	2805	A	N	Saturation-Mutagenesis	-0.103	46.7917	-4.168	Deleterious	0.942419	-17	deleterious	-1.312	-3.703	30.4283	0.306362	0.666399	12.1006	0.0428077	1.02354	DNA-PKCS_A2805N
DNA-PKCS	3	missense	A2805P	DNA-PKCS	2805	2805	A	P	Saturation-Mutagenesis	-0.06	46.7917	-3.807	Deleterious	0.942419	53	deleterious	-1.312	-3.083	30.4283	0.306362	0.666399	12.1006	0.0428077	1.02354	DNA-PKCS_A2805P
DNA-PKCS	3	missense	A2805Q	DNA-PKCS	2805	2805	A	Q	Saturation-Mutagenesis	-0.169	46.7917	-3.74	Deleterious	0.942419	-30	deleterious	-1.312	-4.094	30.4283	0.306362	0.666399	12.1006	0.0428077	1.02354	DNA-PKCS_A2805Q
DNA-PKCS	3	missense	A2805R	DNA-PKCS	2805	2805	A	R	Saturation-Mutagenesis	-0.269	46.7917	-3.807	Deleterious	0.942419	-37	deleterious	-1.312	-4.038	30.4283	0.344855	0.703336	12.319	0.0458663	1.13969	DNA-PKCS_A2805R
DNA-PKCS	1	missense	A2805S	DNA-PKCS	2805	2805	A	S	Pathogenic	-0.219	46.7917	-1.884	Neutral	0.942419	-38	deleterious	-1.312	-4.017	30.4283	0.306362	0.666399	12.1006	0.0428077	1.02354	DNA-PKCS_A2805S
DNA-PKCS	3	missense	A2805T	DNA-PKCS	2805	2805	A	T	Saturation-Mutagenesis	-0.262	46.7917	-2.979	Deleterious	0.942419	-26	deleterious	-1.312	-4.711	30.4283	0.306362	0.666399	12.1006	0.0428077	1.02354	DNA-PKCS_A2805T
DNA-PKCS	3	missense	A2805V	DNA-PKCS	2805	2805	A	V	Saturation-Mutagenesis	-0.619	46.7917	-3.279	Deleterious	0.942419	-22	deleterious	-1.312	-2.475	30.4283	0.306362	0.666399	12.1006	0.0428077	1.02354	DNA-PKCS_A2805V
DNA-PKCS	3	missense	A2805W	DNA-PKCS	2805	2805	A	W	Saturation-Mutagenesis	-0.948	46.7917	-5.33	Deleterious	0.943141	-44	deleterious	-1.047	-3.794	30.4283	0.306362	0.666399	12.1006	0.0428077	1.02354	DNA-PKCS_A2805W
DNA-PKCS	3	missense	A2805Y	DNA-PKCS	2805	2805	A	Y	Saturation-Mutagenesis	-0.524	46.7917	-4.668	Deleterious	0.942419	-50	deleterious	-1.047	-3.617	30.4283	0.306362	0.666399	12.1006	0.0428077	1.02354	DNA-PKCS_A2805Y
DNA-PKCS	3	missense	A2866C	DNA-PKCS	2866	2866	A	C	Saturation-Mutagenesis	-0.065	63.035	-1.572	Neutral	0.846393	9	deleterious	-1.295	-4.536	37.5995	0.494961	1.24287	14.0659	0.0573849	1.69558	DNA-PKCS_A2866C
DNA-PKCS	3	missense	A2866D	DNA-PKCS	2866	2866	A	D	Saturation-Mutagenesis	0.868	63.035	-0.24	Neutral	0.846393	-75	deleterious	-1.295	-2.448	37.5995	0.494961	1.24287	14.0659	0.0573849	1.69558	DNA-PKCS_A2866D
DNA-PKCS	3	missense	A2866E	DNA-PKCS	2866	2866	A	E	Saturation-Mutagenesis	-0.042	63.035	0.097	Neutral	0.846393	-13	deleterious	-1.295	-2.218	37.5995	0.494961	1.24287	14.0659	0.0573849	1.69558	DNA-PKCS_A2866E
DNA-PKCS	3	missense	A2866F	DNA-PKCS	2866	2866	A	F	Saturation-Mutagenesis	-0.166	63.035	-2.213	Neutral	0.846393	-19	deleterious	-1.311	-2.407	37.5995	0.494961	1.24287	14.0659	0.0573849	1.69558	DNA-PKCS_A2866F
DNA-PKCS	3	missense	A2866G	DNA-PKCS	2866	2866	A	G	Saturation-Mutagenesis	0.024	63.035	-1.314	Neutral	0.846393	49	deleterious	-1.295	-4.102	37.5995	0.494961	1.24287	14.0659	0.0573849	1.69558	DNA-PKCS_A2866G
DNA-PKCS	3	missense	A2866H	DNA-PKCS	2866	2866	A	H	Saturation-Mutagenesis	-1.27	63.035	-0.798	Neutral	0.846393	-54	deleterious	-1.295	-3.719	37.5995	0.494961	1.24287	14.0659	0.0573849	1.69558	DNA-PKCS_A2866H
DNA-PKCS	3	missense	A2866I	DNA-PKCS	2866	2866	A	I	Saturation-Mutagenesis	-0.198	63.035	-1.368	Neutral	0.846393	-14	deleterious	-1.311	-4.374	37.5995	0.494961	1.24287	14.0659	0.0573849	1.69558	DNA-PKCS_A2866I
DNA-PKCS	3	missense	A2866K	DNA-PKCS	2866	2866	A	K	Saturation-Mutagenesis	-0.323	63.035	0.097	Neutral	0.846393	-72	deleterious	-1.295	-3.956	37.5995	0.494961	1.24287	14.0659	0.0573849	1.69558	DNA-PKCS_A2866K
DNA-PKCS	3	missense	A2866L	DNA-PKCS	2866	2866	A	L	Saturation-Mutagenesis	-0.172	63.035	-1.158	Neutral	0.846393	24	deleterious	-1.311	-3.499	37.5995	0.494961	1.24287	14.0659	0.0573849	1.69558	DNA-PKCS_A2866L
DNA-PKCS	3	missense	A2866M	DNA-PKCS	2866	2866	A	M	Saturation-Mutagenesis	-0.166	63.035	-0.805	Neutral	0.846393	-6	deleterious	-1.311	-3.083	37.5995	0.494961	1.24287	14.0659	0.0573849	1.69558	DNA-PKCS_A2866M
[truncated: 65,712 more rows]

## Sheet: KU70_80_Sat_mut
gene	insight_class	consequence	Mutations	chrom	pos	protein_position	ref	alt	variants	mCSM_PPI	Distance_interface	Provean_scores	Provean_Predicted_Effect	MTR_scores	SNAP2_scores	polyphen2_class	polyphen2_Score1	polyphen2_Score2	Clash	Covalent	VDWClash	VDW	Proximal	Hbond	WeakHbond	Halogen	Ionic	Metal	Aromatic	Hydrophobic	Carbonyl	Polar	WeakPolar	PI-PI	Carbon-PI	Cation-PI	Donor-PI	MetalSulphur-PI	Halogen-PI	Amide-Amide	Amide-Ring	d_Clash	d_Covalent	d_VDWClash	d_VDW	d_Proximal	d_Hbond	d_WeakHbond	d_Halogen
[truncated: 19,437 more rows]
[truncated: 23 more columns]

[truncated: 6 more sheets: LIG4_Sat_mut, XRCC4_Sat_mut, XRCC4, LIG4, DNA-PKcs, KU70-80]
